# Supplementary material for: Genomic Resources for Water Yam (Dioscorea alata L.): Analyses of EST-Sequences, De Novo Sequencing and GBS Libraries
Source: PLoS One. 2015 Jul 29;10(7):e0134031. doi: 10.1371/journal.pone.0134031 (PMC4519108; doi:10.1371/journal.pone.0134031)
Supplement: S1 Table — (XLSX) [file pone.0134031.s001.xlsx]

## Sheet: Supplemental Table 1
S1 Table. List of EST-SSRs, primer sequences, repeat motifs, product size range and their polymorphism.
Left Primer Name	Left Primer with tail	Right Primer name	Right Primer with tail	Repeat Motif	Repeat Motif w/subscript	Repeat Motif w/o number	Allele Min	Allele Max	Allele Range	Poly/Monomorphic													Oligo name	Oligo sequence (5' to 3') w/tag		ordername	Marker Name L	MinMatch	Type	Length	(Repeat Motif)	#	Repeat Motif			Marker Name L	Repeat Motif			Marker Name L	MinMatch				YAM_EST_jan2012	Marker Name L	MinPeak
Wc_4200_aL	CAGTTTTCCCAGTCACGACATATAAGGCCAGCTCTGAAGGACA	Wc_4200_aR	GTTTGCTTGTCTTCTTCATCTTGTGGCT	(AGC)12	(AGC)12	AGC	0	0	-	Didn't Work													Wc_4200_aL	CAGTTTTCCCAGTCACGACATATAAGGCCAGCTCTGAAGGACA		yam_W_contig_4200_a	Wc_4200_aL	AGC	3	36	(AGC)	12	(AGC)12			Wc_4200_aL	(AGC)12			Wc_4200_aL	AGC				Wc_4200_a	Wc_4200_aL
Wc_4163_aL	CAGTTTTCCCAGTCACGACCGGAAGAACAAACGCTCCAA	Wc_4163_aR	GTTTGCTGCTAGACTAGACTGCTGCTGA	(ACC)10	(ACC)10	ACC	145	219	145-219	Polymorphic													Wc_4163_aL	CAGTTTTCCCAGTCACGACCGGAAGAACAAACGCTCCAA		yam_W_contig_4163_a	Wc_4163_aL	ACC	3	30	(ACC)	10	(ACC)10			Wc_4163_aL	(ACC)10			Wc_4163_aL	ACC				Wc_4163_a	Wc_4163_aL	145
Wc_4451_aL	CAGTTTTCCCAGTCACGACAGCCAGTTAATGAGAGGGAGGAAG	Wc_4451_aR	GTTTTACCGGATGGCTGATGTAAATCTT	(TGA)10	(TGA)10	TGA	63	63	63-63	Monomorphic													Wc_4451_aL	CAGTTTTCCCAGTCACGACAGCCAGTTAATGAGAGGGAGGAAG		yam_W_contig_4451_a	Wc_4451_aL	TGA	3	30	(TGA)	10	(TGA)10			Wc_4451_aL	(TGA)10			Wc_4451_aL	TGA				Wc_4451_a	Wc_4451_aL	63
Wc_5951_aL	CAGTTTTCCCAGTCACGACTCCCGTTTCTCAGGTAATCAGTTC	Wc_5951_aR	GTTTGTTTCAACCGATGTTTTCTCAAGC	(TTC)10	(TTC)10	TTC	147	163	147-163	Polymorphic													Wc_5951_aL	CAGTTTTCCCAGTCACGACTCCCGTTTCTCAGGTAATCAGTTC		yam_W_contig_5951_a	Wc_5951_aL	TTC	3	30	(TTC)	10	(TTC)10			Wc_5951_aL	(TTC)10			Wc_5951_aL	TTC				Wc_5951_a	Wc_5951_aL	147
Ws87_c12398_aL	CAGTTTTCCCAGTCACGACGTCGCTTCTTACCATCTTGAGGCT	Ws87_c12398_aR	GTTTTGTACCAAGGAGAGGCGTAAAGAA	(TCA)10	(TCA)10	TCA	94	106	94-106	Polymorphic													Ws87_c12398_aL	CAGTTTTCCCAGTCACGACGTCGCTTCTTACCATCTTGAGGCT		yam_W_singleton_87-01091-33_1_c12398_a	Ws87_c12398_aL	TCA	3	30	(TCA)	10	(TCA)10			Ws87_c12398_aL	(TCA)10			Ws87_c12398_aL	TCA				Ws87_c12398_a	Ws87_c12398_aL	94
Ws87_c5038_aL	CAGTTTTCCCAGTCACGACCAAAACCCTTCTCCCAAAACTCTT	Ws87_c5038_aR	GTTTGTCATGAAGAGCAGAGAAGTGACG	(TCCTCT)5	(TCCTCT)5	TCCTCT	93	105	93-105	Polymorphic													Ws87_c5038_aL	CAGTTTTCCCAGTCACGACCAAAACCCTTCTCCCAAAACTCTT		yam_W_singleton_87-01091-33_1_c5038_a	Ws87_c5038_aL	TCCTCT	6	30	(TCCTCT)	5	(TCCTCT)5			Ws87_c5038_aL	(TCCTCT)5			Ws87_c5038_aL	TCCTCT				Ws87_c5038_a	Ws87_c5038_aL	93
WsA8_c2862_10_aL	CAGTTTTCCCAGTCACGACAGGACCCTTCTTCCTCAATAGCAT	WsA8_c2862_10_aR	GTTTCTCTTTGATCTCCCATGGTGTTCT	(ACA)10	(ACA)10	ACA	169	175	169-175	Polymorphic													WsA8_c2862_10_aL	CAGTTTTCCCAGTCACGACAGGACCCTTCTTCCTCAATAGCAT		yam_W_singleton_A328-33_8_c2862_10_a	WsA8_c2862_10_aL	ACA	3	30	(ACA)	10	(ACA)10			WsA8_c2862_10_aL	(ACA)10			WsA8_c2862_10_aL	ACA				WsA8_c2862_10_a	WsA8_c2862_10_aL	169
Wc_1200_aL	CAGTTTTCCCAGTCACGACATTTACTGAGGGAGCAAATGCAAA	Wc_1200_aR	GTTTCAGCAAAACCTTCATCCTCTGAAT	(GATGGT)4	(GATGGT)4	GATGGT	142	162	142-162	Polymorphic													Wc_1200_aL	CAGTTTTCCCAGTCACGACATTTACTGAGGGAGCAAATGCAAA		yam_W_contig_1200_a	Wc_1200_aL	GATGGT	6	24	(GATGGT)	4	(GATGGT)4			Wc_1200_aL	(GATGGT)4			Wc_1200_aL	GATGGT				Wc_1200_a	Wc_1200_aL	142
Wc_1217_aL	CAGTTTTCCCAGTCACGACGGACTTGGAGCTCTTGATCCC	Wc_1217_aR	GTTTGAGTGATGATGGTGATGGTGAGAG	(CTCCGG)4	(CTCCGG)4	CTCCGG	131	137	131-137	Polymorphic													Wc_1217_aL	CAGTTTTCCCAGTCACGACGGACTTGGAGCTCTTGATCCC		yam_W_contig_1217_a	Wc_1217_aL	CTCCGG	6	24	(CTCCGG)	4	(CTCCGG)4			Wc_1217_aL	(CTCCGG)4			Wc_1217_aL	CTCCGG				Wc_1217_a	Wc_1217_aL	131
Wc_1977_aL	CAGTTTTCCCAGTCACGACAGACCAGAAGCAGCAGAAGGAAG	Wc_1977_aR	GTTTCACTTCAGTGAAAATGCAGATGCT	(GTCTCA)4	(GTCTCA)4	GTCTCA	125	134	125-134	Polymorphic													Wc_1977_aL	CAGTTTTCCCAGTCACGACAGACCAGAAGCAGCAGAAGGAAG		yam_W_contig_1977_a	Wc_1977_aL	GTCTCA	6	24	(GTCTCA)	4	(GTCTCA)4			Wc_1977_aL	(GTCTCA)4			Wc_1977_aL	GTCTCA				Wc_1977_a	Wc_1977_aL	125
Wc_2084_aL	CAGTTTTCCCAGTCACGACGCCTTCATGCAGCAATACCTATCT	Wc_2084_aR	GTTTTCTTCCACTGCTCTCAATCACAAC	(GCTAAT)4	(GCTAAT)4	GCTAAT	172	178	172-178	Polymorphic													Wc_2084_aL	CAGTTTTCCCAGTCACGACGCCTTCATGCAGCAATACCTATCT		yam_W_contig_2084_a	Wc_2084_aL	GCTAAT	6	24	(GCTAAT)	4	(GCTAAT)4			Wc_2084_aL	(GCTAAT)4			Wc_2084_aL	GCTAAT				Wc_2084_a	Wc_2084_aL	172
Wc_2183_aL	CAGTTTTCCCAGTCACGACGGTATTTCAAGGTGAGGACGAGAG	Wc_2183_aR	GTTTCTGGCTTCTCCTCCTAATTTGGTT	(AGCAAG)4	(AGCAAG)4	AGCAAG	178	178	178-178	Monomorphic													Wc_2183_aL	CAGTTTTCCCAGTCACGACGGTATTTCAAGGTGAGGACGAGAG		yam_W_contig_2183_a	Wc_2183_aL	AGCAAG	6	24	(AGCAAG)	4	(AGCAAG)4			Wc_2183_aL	(AGCAAG)4			Wc_2183_aL	AGCAAG				Wc_2183_a	Wc_2183_aL	178
Wc_3404_aL	CAGTTTTCCCAGTCACGACAGAGCAGTTTATGATGGAAGCCTG	Wc_3404_aR	GTTTCTCCTGCACATGAAACTCATTTTG	(CAT)8	(CAT)8	CAT	144	157	144-157	Polymorphic													Wc_3404_aL	CAGTTTTCCCAGTCACGACAGAGCAGTTTATGATGGAAGCCTG		yam_W_contig_3404_a	Wc_3404_aL	CAT	3	24	(CAT)	8	(CAT)8			Wc_3404_aL	(CAT)8			Wc_3404_aL	CAT				Wc_3404_a	Wc_3404_aL	144
Wc_447_aL	CAGTTTTCCCAGTCACGACGGAACTTGTGTGTACCCATCATCA	Wc_447_aR	GTTTATACCAGCACCAGGAATAAAACCA	(CTGGTG)4	(CTGGTG)4	CTGGTG	270	282	270-282	Polymorphic													Wc_447_aL	CAGTTTTCCCAGTCACGACGGAACTTGTGTGTACCCATCATCA		yam_W_contig_447_a	Wc_447_aL	CTGGTG	6	24	(CTGGTG)	4	(CTGGTG)4			Wc_447_aL	(CTGGTG)4			Wc_447_aL	CTGGTG				Wc_447_a	Wc_447_aL	270
Wc_46_aL	CAGTTTTCCCAGTCACGACAAGCTGTTGGAGTGAAAATTGTGG	Wc_46_aR	GTTTCTTCCGCTGCTTTCTTATCCTCTT	(GAT)8	(GAT)8	GAT	73	73	73-73	Monomorphic													Wc_46_aL	CAGTTTTCCCAGTCACGACAAGCTGTTGGAGTGAAAATTGTGG		yam_W_contig_46_a	Wc_46_aL	GAT	3	24	(GAT)	8	(GAT)8			Wc_46_aL	(GAT)8			Wc_46_aL	GAT				Wc_46_a	Wc_46_aL	73
Wc_4696_aL	CAGTTTTCCCAGTCACGACCCTCATGGTTGCTCCACACA	Wc_4696_aR	GTTTATTCCAGGAACACAGCTACTGCAT	(CAT)8	(CAT)8	CAT	164	164	164-164	Monomorphic													Wc_4696_aL	CAGTTTTCCCAGTCACGACCCTCATGGTTGCTCCACACA		yam_W_contig_4696_a	Wc_4696_aL	CAT	3	24	(CAT)	8	(CAT)8			Wc_4696_aL	(CAT)8			Wc_4696_aL	CAT				Wc_4696_a	Wc_4696_aL	164
Wc_4909_aL	CAGTTTTCCCAGTCACGACGTTTCTTGCTTGAAAAGACCACCA	Wc_4909_aR	GTTTAACTCAGATAGCAACAGTGAGGGG	(TTTTGG)4	(TTTTGG)4	TTTTGG	171	171	171-171	Monomorphic													Wc_4909_aL	CAGTTTTCCCAGTCACGACGTTTCTTGCTTGAAAAGACCACCA		yam_W_contig_4909_a	Wc_4909_aL	TTTTGG	6	24	(TTTTGG)	4	(TTTTGG)4			Wc_4909_aL	(TTTTGG)4			Wc_4909_aL	TTTTGG				Wc_4909_a	Wc_4909_aL	171
Wc_531_aL	CAGTTTTCCCAGTCACGACGAAAGAGAAGGATGGGAAGGATCA	Wc_531_aR	GTTTGGCATGGAGGCAAGGACTTC	(AGC)8	(AGC)8	AGC	162	176	162-176	Polymorphic													Wc_531_aL	CAGTTTTCCCAGTCACGACGAAAGAGAAGGATGGGAAGGATCA		yam_W_contig_531_a	Wc_531_aL	AGC	3	24	(AGC)	8	(AGC)8			Wc_531_aL	(AGC)8			Wc_531_aL	AGC				Wc_531_a	Wc_531_aL	162
Wc_5485_aL	CAGTTTTCCCAGTCACGACTGATTGAAGCAATGAGGATGAAGA	Wc_5485_aR	GTTTAAGCTCTCCCTCAAAACCCTAGAA	(TCT)8	(TCT)8	TCT	146	162	146-162	Polymorphic													Wc_5485_aL	CAGTTTTCCCAGTCACGACTGATTGAAGCAATGAGGATGAAGA		yam_W_contig_5485_a	Wc_5485_aL	TCT	3	24	(TCT)	8	(TCT)8			Wc_5485_aL	(TCT)8			Wc_5485_aL	TCT				Wc_5485_a	Wc_5485_aL	146
Wc_962_aL	CAGTTTTCCCAGTCACGACCAAGTATCCTGTTCACCATTGCAC	Wc_962_aR	GTTTACAAGAAAAGAAGCCATGAAACCA	(CTT)8	(CTT)8	CTT	169	179	169-179	Polymorphic													Wc_962_aL	CAGTTTTCCCAGTCACGACCAAGTATCCTGTTCACCATTGCAC		yam_W_contig_962_a	Wc_962_aL	CTT	3	24	(CTT)	8	(CTT)8			Wc_962_aL	(CTT)8			Wc_962_aL	CTT				Wc_962_a	Wc_962_aL	169
Ws87_c7372_aL	CAGTTTTCCCAGTCACGACCATCCGAATCCGATACCCTCTTTA	Ws87_c7372_aR	GTTTGGAGTCGACGATGGAGTTAGAGG	(CCTCCG)4	(CCTCCG)4	CCTCCG	170	176	170-176	Polymorphic													Ws87_c7372_aL	CAGTTTTCCCAGTCACGACCATCCGAATCCGATACCCTCTTTA		yam_W_singleton_87-01091-33_1_c7372_a	Ws87_c7372_aL	CCTCCG	6	24	(CCTCCG)	4	(CCTCCG)4			Ws87_c7372_aL	(CCTCCG)4			Ws87_c7372_aL	CCTCCG				Ws87_c7372_a	Ws87_c7372_aL	170
Ws87_c7600_aL	CAGTTTTCCCAGTCACGACCATCATCGTACGCAGATAGTTTGG	Ws87_c7600_aR	GTTTTTCCAATTCGATCAAATCATTCCT	(GTCGCC)4	(GTCGCC)4	GTCGCC	139	139	139-139	Monomorphic													Ws87_c7600_aL	CAGTTTTCCCAGTCACGACCATCATCGTACGCAGATAGTTTGG		yam_W_singleton_87-01091-33_1_c7600_a	Ws87_c7600_aL	GTCGCC	6	24	(GTCGCC)	4	(GTCGCC)4			Ws87_c7600_aL	(GTCGCC)4			Ws87_c7600_aL	GTCGCC				Ws87_c7600_a	Ws87_c7600_aL	139
Ws87_lrc3111_aL	CAGTTTTCCCAGTCACGACTCTTTGTTAATGTTTGGGGTTTGC	Ws87_lrc3111_aR	GTTTCACCGAATGGCACATACTTGAC	(GAA)8	(GAA)8	GAA	154	174	154-174	Polymorphic													Ws87_lrc3111_aL	CAGTTTTCCCAGTCACGACTCTTTGTTAATGTTTGGGGTTTGC		yam_W_singleton_87-01091-33_1_lrc3111_a	Ws87_lrc3111_aL	GAA	3	24	(GAA)	8	(GAA)8			Ws87_lrc3111_aL	(GAA)8			Ws87_lrc3111_aL	GAA				Ws87_lrc3111_a	Ws87_lrc3111_aL	154
WsA8_c10812_2_aL	CAGTTTTCCCAGTCACGACAATCAAGGGACATATAGATGCGGA	WsA8_c10812_2_aR	GTTTGCAGCAAACCAAAGACCTGATAGT	(GAT)8	(GAT)8	GAT	0	0	-	Didn't Work													WsA8_c10812_2_aL	CAGTTTTCCCAGTCACGACAATCAAGGGACATATAGATGCGGA		yam_W_singleton_A328-33_8_c10812_2_a	WsA8_c10812_2_aL	GAT	3	24	(GAT)	8	(GAT)8			WsA8_c10812_2_aL	(GAT)8			WsA8_c10812_2_aL	GAT				WsA8_c10812_2_a	WsA8_c10812_2_aL
WsA8_c9061_3_aL	CAGTTTTCCCAGTCACGACTTAGATCTAGAAAATGGCATCGCA	WsA8_c9061_3_aR	GTTTAAACCGAAGCATCCTGATTTGATA	(TGC)8	(TGC)8	TGC	162	162	162-162	Monomorphic													WsA8_c9061_3_aL	CAGTTTTCCCAGTCACGACTTAGATCTAGAAAATGGCATCGCA		yam_W_singleton_A328-33_8_c9061_3_a	WsA8_c9061_3_aL	TGC	3	24	(TGC)	8	(TGC)8			WsA8_c9061_3_aL	(TGC)8			WsA8_c9061_3_aL	TGC				WsA8_c9061_3_a	WsA8_c9061_3_aL	162
Wc_1967_aL	CAGTTTTCCCAGTCACGACAAGAGATTCCAACTTTGCAACCAG	Wc_1967_aR	GTTTCTTCCTTTAACTTGTTTCTGCCCA	(CAA)8	(CAA)8	CAA	153	164	153-164	Polymorphic													Wc_1967_aL	CAGTTTTCCCAGTCACGACAAGAGATTCCAACTTTGCAACCAG		yam_W_contig_1967_a	Wc_1967_aL	CAA	3	24	(CAA)	8	(CAA)8			Wc_1967_aL	(CAA)8			Wc_1967_aL	CAA				Wc_1967_a	Wc_1967_aL	153
Wc_1996_aL	CAGTTTTCCCAGTCACGACCCACCATTCCAAGACTGAAGGTTA	Wc_1996_aR	GTTTGAATAACACTCCTTTGATCCCTTCAA	(TAT)7	(TAT)7	TAT	163	172	163-172	Polymorphic													Wc_1996_aL	CAGTTTTCCCAGTCACGACCCACCATTCCAAGACTGAAGGTTA		yam_W_contig_1996_a	Wc_1996_aL	TAT	3	21	(TAT)	7	(TAT)7			Wc_1996_aL	(TAT)7			Wc_1996_aL	TAT				Wc_1996_a	Wc_1996_aL	163
Wc_2191_bL	CAGTTTTCCCAGTCACGACCTCAATCCCTCTCTCCCACCTC	Wc_2191_bR	GTTTAGTTTGGGGTCGAAAATCCAGTAG	(CTC)7	(CTC)7	CTC	171	171	171-171	Monomorphic													Wc_2191_bL	CAGTTTTCCCAGTCACGACCTCAATCCCTCTCTCCCACCTC		yam_W_contig_2191_b	Wc_2191_bL	CTC	3	21	(CTC)	7	(CTC)7			Wc_2191_bL	(CTC)7			Wc_2191_bL	CTC				Wc_2191_b	Wc_2191_bL	171
Wc_3810_aL	CAGTTTTCCCAGTCACGACCTGGTCCGAGAGCCACTTTAACTA	Wc_3810_aR	GTTTCCTCCTGTCCTTCACTTTTGATGT	(GAT)7	(GAT)7	GAT	105	105	105-105	Monomorphic													Wc_3810_aL	CAGTTTTCCCAGTCACGACCTGGTCCGAGAGCCACTTTAACTA		yam_W_contig_3810_a	Wc_3810_aL	GAT	3	21	(GAT)	7	(GAT)7			Wc_3810_aL	(GAT)7			Wc_3810_aL	GAT				Wc_3810_a	Wc_3810_aL	105
Wc_3915_aL	CAGTTTTCCCAGTCACGACACCTTAAGCAAGATCAAGACGGTG	Wc_3915_aR	GTTTCGGTCCGAGTATCTTCACTTCAAT	(TGC)7	(TGC)7	TGC	132	136	132-136	Polymorphic													Wc_3915_aL	CAGTTTTCCCAGTCACGACACCTTAAGCAAGATCAAGACGGTG		yam_W_contig_3915_a	Wc_3915_aL	TGC	3	21	(TGC)	7	(TGC)7			Wc_3915_aL	(TGC)7			Wc_3915_aL	TGC				Wc_3915_a	Wc_3915_aL	132
Wc_422_aL	CAGTTTTCCCAGTCACGACCACCATTTTTCCCAGCTATTCAAG	Wc_422_aR	GTTTCGGTGAAGCATGTAAAATGCAGTA	(CAG)7	(CAG)7	CAG	159	165	159-165	Polymorphic													Wc_422_aL	CAGTTTTCCCAGTCACGACCACCATTTTTCCCAGCTATTCAAG		yam_W_contig_422_a	Wc_422_aL	CAG	3	21	(CAG)	7	(CAG)7			Wc_422_aL	(CAG)7			Wc_422_aL	CAG				Wc_422_a	Wc_422_aL	159
Wc_4410_aL	CAGTTTTCCCAGTCACGACAACAGAAGAACAGGCAAGATTTGG	Wc_4410_aR	GTTTTGCAAACTACTCCTTTTGGGACAT	(ACC)7	(ACC)7	ACC	154	160	154-160	Polymorphic													Wc_4410_aL	CAGTTTTCCCAGTCACGACAACAGAAGAACAGGCAAGATTTGG		yam_W_contig_4410_a	Wc_4410_aL	ACC	3	21	(ACC)	7	(ACC)7			Wc_4410_aL	(ACC)7			Wc_4410_aL	ACC				Wc_4410_a	Wc_4410_aL	154
Wc_5003_aL	CAGTTTTCCCAGTCACGACCGGGAGTGAGACAGAGATGTCA	Wc_5003_aR	GTTTCGATCCACTCTTCAAGGTCAAGAT	(CTC)7	(CTC)7	CTC	179	185	179-185	Polymorphic													Wc_5003_aL	CAGTTTTCCCAGTCACGACCGGGAGTGAGACAGAGATGTCA		yam_W_contig_5003_a	Wc_5003_aL	CTC	3	21	(CTC)	7	(CTC)7			Wc_5003_aL	(CTC)7			Wc_5003_aL	CTC				Wc_5003_a	Wc_5003_aL	179
Wc_5531_aL	CAGTTTTCCCAGTCACGACGTCCTCTTTTTGACCCTCTTCCTC	Wc_5531_aR	GTTTGTATTGCTGGAACCTGGAGATAGC	(GCG)7	(GCG)7	GCG	102	108	102-108	Polymorphic													Wc_5531_aL	CAGTTTTCCCAGTCACGACGTCCTCTTTTTGACCCTCTTCCTC		yam_W_contig_5531_a	Wc_5531_aL	GCG	3	21	(GCG)	7	(GCG)7			Wc_5531_aL	(GCG)7			Wc_5531_aL	GCG				Wc_5531_a	Wc_5531_aL	102
Wc_5598_aL	CAGTTTTCCCAGTCACGACGGAGGCTGAGCTAGATCCAGTG	Wc_5598_aR	GTTTATCCTAGAGATGCCTTCCCTTGTC	(GAA)7	(GAA)7	GAA	174	177	174-177	Polymorphic													Wc_5598_aL	CAGTTTTCCCAGTCACGACGGAGGCTGAGCTAGATCCAGTG		yam_W_contig_5598_a	Wc_5598_aL	GAA	3	21	(GAA)	7	(GAA)7			Wc_5598_aL	(GAA)7			Wc_5598_aL	GAA				Wc_5598_a	Wc_5598_aL	174
Wc_6250_aL	CAGTTTTCCCAGTCACGACCCTACAAAAACTGAAGAGGCTGGA	Wc_6250_aR	GTTTCAAGGCCAGATCATAACCACTTCT	(GTG)7	(GTG)7	GTG	167	173	167-173	Polymorphic													Wc_6250_aL	CAGTTTTCCCAGTCACGACCCTACAAAAACTGAAGAGGCTGGA		yam_W_contig_6250_a	Wc_6250_aL	GTG	3	21	(GTG)	7	(GTG)7			Wc_6250_aL	(GTG)7			Wc_6250_aL	GTG				Wc_6250_a	Wc_6250_aL	167
Wc_7014_aL	CAGTTTTCCCAGTCACGACGTGACTGTCAGAACGAACCAATGT	Wc_7014_aR	GTTTCGAAACTACCACCACCGGTAACTA	(GGT)7	(GGT)7	GGT	0	0	-	Didn't Work													Wc_7014_aL	CAGTTTTCCCAGTCACGACGTGACTGTCAGAACGAACCAATGT		yam_W_contig_7014_a	Wc_7014_aL	GGT	3	21	(GGT)	7	(GGT)7			Wc_7014_aL	(GGT)7			Wc_7014_aL	GGT				Wc_7014_a	Wc_7014_aL
Wc_775_aL	CAGTTTTCCCAGTCACGACCAGATGAGTACAAGAAAGGCACCG	Wc_775_aR	GTTTTTTGAGCGCATATCAGACATGAAG	(TGG)7	(TGG)7	TGG	162	165	162-165	Polymorphic													Wc_775_aL	CAGTTTTCCCAGTCACGACCAGATGAGTACAAGAAAGGCACCG		yam_W_contig_775_a	Wc_775_aL	TGG	3	21	(TGG)	7	(TGG)7			Wc_775_aL	(TGG)7			Wc_775_aL	TGG				Wc_775_a	Wc_775_aL	162
Wc_777_aL	CAGTTTTCCCAGTCACGACAAAGAGAGGAGCATTGAAGGAAGG	Wc_777_aR	GTTTTTCTAATGCATTGGTTTCAGGCTT	(CAA)7	(CAA)7	CAA	116	131	116-131	Polymorphic													Wc_777_aL	CAGTTTTCCCAGTCACGACAAAGAGAGGAGCATTGAAGGAAGG		yam_W_contig_777_a	Wc_777_aL	CAA	3	21	(CAA)	7	(CAA)7			Wc_777_aL	(CAA)7			Wc_777_aL	CAA				Wc_777_a	Wc_777_aL	116
WsB9_c11432_2_aL	CAGTTTTCCCAGTCACGACAAAGAGCAGCAACTGAAAAAGCTC	WsB9_c11432_2_aR	GTTTAAAGTCCATCTGCTTGCTCTCATC	(GAA)7	(GAA)7	GAA	180	180	180-180	Monomorphic													WsB9_c11432_2_aL	CAGTTTTCCCAGTCACGACAAAGAGCAGCAACTGAAAAAGCTC		yam_W_singleton_B310-33_9_c11432_2_a	WsB9_c11432_2_aL	GAA	3	21	(GAA)	7	(GAA)7			WsB9_c11432_2_aL	(GAA)7			WsB9_c11432_2_aL	GAA				WsB9_c11432_2_a	WsB9_c11432_2_aL	180
Wc_3780_aL	CAGTTTTCCCAGTCACGACGAGAGTTTTGGAGAGTTTGGTGGA	Wc_3780_aR	GTTTTGTTTGCATGATTTCTTGGTTTTG	(GCA)7	(GCA)7	GCA	463	469	463-469	Polymorphic													Wc_3780_aL	CAGTTTTCCCAGTCACGACGAGAGTTTTGGAGAGTTTGGTGGA		yam_W_contig_3780_a	Wc_3780_aL	GCA	3	21	(GCA)	7	(GCA)7			Wc_3780_aL	(GCA)7			Wc_3780_aL	GCA				Wc_3780_a	Wc_3780_aL	463
Wc_4446_aL	CAGTTTTCCCAGTCACGACAAATGCTGGAAAAGCTACCTGAGA	Wc_4446_aR	GTTTTATTCTTGGGGGAGGATCTACACA	(GAAGT)4	(GAAGT)4	GAAGT	167	167	167-167	Monomorphic													Wc_4446_aL	CAGTTTTCCCAGTCACGACAAATGCTGGAAAAGCTACCTGAGA		yam_W_contig_4446_a	Wc_4446_aL	GAAGT	5	20	(GAAGT)	4	(GAAGT)4			Wc_4446_aL	(GAAGT)4			Wc_4446_aL	GAAGT				Wc_4446_a	Wc_4446_aL	167
Wc_4844_aL	CAGTTTTCCCAGTCACGACTGAGGAACTTACCACTGCTCCTCT	Wc_4844_aR	GTTTCACAACCACCAACTAACCAAACAA	(TGAAA)4	(TGAAA)4	TGAAA	66	66	66-66	Monomorphic													Wc_4844_aL	CAGTTTTCCCAGTCACGACTGAGGAACTTACCACTGCTCCTCT		yam_W_contig_4844_a	Wc_4844_aL	TGAAA	5	20	(TGAAA)	4	(TGAAA)4			Wc_4844_aL	(TGAAA)4			Wc_4844_aL	TGAAA				Wc_4844_a	Wc_4844_aL	66
Wc_1665_aL	CAGTTTTCCCAGTCACGACAGGAAGGGTTGTTGGTTGGTATTT	Wc_1665_aR	GTTTTCTGGAAGAGCACAGAGGAAAGAT	(GCT)6	(GCT)6	GCT	164	164	164-164	Monomorphic													Wc_1665_aL	CAGTTTTCCCAGTCACGACAGGAAGGGTTGTTGGTTGGTATTT		yam_W_contig_1665_a	Wc_1665_aL	GCT	3	18	(GCT)	6	(GCT)6			Wc_1665_aL	(GCT)6			Wc_1665_aL	GCT				Wc_1665_a	Wc_1665_aL	164
Wc_2151_aL	CAGTTTTCCCAGTCACGACCACATCTCCAACCTTAGAGCAAGC	Wc_2151_aR	GTTTGCCGGAGGAATTATTGTTTTGTTT	(CAC)6	(CAC)6	CAC	100	100	100-100	Monomorphic													Wc_2151_aL	CAGTTTTCCCAGTCACGACCACATCTCCAACCTTAGAGCAAGC		yam_W_contig_2151_a	Wc_2151_aL	CAC	3	18	(CAC)	6	(CAC)6			Wc_2151_aL	(CAC)6			Wc_2151_aL	CAC				Wc_2151_a	Wc_2151_aL	100
Wc_2196_bL	CAGTTTTCCCAGTCACGACGAGAGATCAAACGATCTCCAGAGG	Wc_2196_bR	GTTTGATTCATCCTCCATCGTCGATTT	(GGT)6	(GGT)6	GGT	138	142	138-142	Polymorphic													Wc_2196_bL	CAGTTTTCCCAGTCACGACGAGAGATCAAACGATCTCCAGAGG		yam_W_contig_2196_b	Wc_2196_bL	GGT	3	18	(GGT)	6	(GGT)6			Wc_2196_bL	(GGT)6			Wc_2196_bL	GGT				Wc_2196_b	Wc_2196_bL	138
Wc_2431_aL	CAGTTTTCCCAGTCACGACCCCAAAGAATCATTTAAACCACCA	Wc_2431_aR	GTTTGAACAAATCCATTGCTTTAGTGGC	(GAA)6	(GAA)6	GAA	156	156	156-156	Monomorphic													Wc_2431_aL	CAGTTTTCCCAGTCACGACCCCAAAGAATCATTTAAACCACCA		yam_W_contig_2431_a	Wc_2431_aL	GAA	3	18	(GAA)	6	(GAA)6			Wc_2431_aL	(GAA)6			Wc_2431_aL	GAA				Wc_2431_a	Wc_2431_aL	156
Wc_2435_aL	CAGTTTTCCCAGTCACGACATTTGTTCAAAGGTTTTCCCTTCC	Wc_2435_aR	GTTTAGTCAAACCCTCTAAAAACCGAGC	(GAC)6	(GAC)6	GAC	174	174	174-174	Monomorphic													Wc_2435_aL	CAGTTTTCCCAGTCACGACATTTGTTCAAAGGTTTTCCCTTCC		yam_W_contig_2435_a	Wc_2435_aL	GAC	3	18	(GAC)	6	(GAC)6			Wc_2435_aL	(GAC)6			Wc_2435_aL	GAC				Wc_2435_a	Wc_2435_aL	174
Wc_3717_aL	CAGTTTTCCCAGTCACGACTATGAATGATGATGGAGCTGGAGA	Wc_3717_aR	GTTTGCAAGGATACTGGCTCTTGATGAT	(AAG)6	(AAG)6	AAG	150	153	150-153	Polymorphic													Wc_4200_aR	GTTTGCTTGTCTTCTTCATCTTGTGGCT		yam_W_contig_3717_a	Wc_3717_aL	AAG	3	18	(AAG)	6	(AAG)6			Wc_3717_aL	(AAG)6			Wc_3717_aL	AAG				Wc_3717_a	Wc_3717_aL	150
Wc_404_aL	CAGTTTTCCCAGTCACGACGTAGGACTCGTCGTAGACCCAAGA	Wc_404_aR	GTTTAAGAGGAGCAAGAATCACCATGAC	(CAC)6	(CAC)6	CAC	124	124	124-124	Monomorphic													Wc_4163_aR	GTTTGCTGCTAGACTAGACTGCTGCTGA		yam_W_contig_404_a	Wc_404_aL	CAC	3	18	(CAC)	6	(CAC)6			Wc_404_aL	(CAC)6			Wc_404_aL	CAC				Wc_404_a	Wc_404_aL	124
Wc_5962_aL	CAGTTTTCCCAGTCACGACTGTCCATCTTTGTCCTCTTCTTCC	Wc_5962_aR	GTTTCCGTTGCTGTAGTTCTTCTTAGGC	(TGA)6	(TGA)6	TGA	183	183	183-183	Monomorphic													Wc_4451_aR	GTTTTACCGGATGGCTGATGTAAATCTT		yam_W_contig_5962_a	Wc_5962_aL	TGA	3	18	(TGA)	6	(TGA)6			Wc_5962_aL	(TGA)6			Wc_5962_aL	TGA				Wc_5962_a	Wc_5962_aL	183
Wc_6200_aL	CAGTTTTCCCAGTCACGACAAATCGCACAACTACCAAAATGCT	Wc_6200_aR	GTTTCATCAAAGCATGGTTCCATTAACA	(AGG)6	(AGG)6	AGG	76	76	76-76	Monomorphic													Wc_5951_aR	GTTTGTTTCAACCGATGTTTTCTCAAGC		yam_W_contig_6200_a	Wc_6200_aL	AGG	3	18	(AGG)	6	(AGG)6			Wc_6200_aL	(AGG)6			Wc_6200_aL	AGG				Wc_6200_a	Wc_6200_aL	76
Wc_6827_aL	CAGTTTTCCCAGTCACGACTAATATTCAGCTTGCATGGAGACG	Wc_6827_aR	GTTTTGAACACAGCTGCACATAAACGTA	(TGG)6	(TGG)6	TGG	145	148	145-148	Polymorphic													Ws87_c12398_aR	GTTTTGTACCAAGGAGAGGCGTAAAGAA		yam_W_contig_6827_a	Wc_6827_aL	TGG	3	18	(TGG)	6	(TGG)6			Wc_6827_aL	(TGG)6			Wc_6827_aL	TGG				Wc_6827_a	Wc_6827_aL	145
Wc_75_aL	CAGTTTTCCCAGTCACGACGAGGAGAAGGAGAAGAAGTCTGTCG	Wc_75_aR	GTTTAGATCTTGTAGGTCTCGCTTCCCT	(AGA)6	(AGA)6	AGA	0	0	-	Didn't Work													Ws87_c5038_aR	GTTTGTCATGAAGAGCAGAGAAGTGACG		yam_W_contig_75_a	Wc_75_aL	AGA	3	18	(AGA)	6	(AGA)6			Wc_75_aL	(AGA)6			Wc_75_aL	AGA				Wc_75_a	Wc_75_aL
Wc_983_aL	CAGTTTTCCCAGTCACGACTACTAGAATGGCCAAAGGAGTGGA	Wc_983_aR	GTTTTCTCAGTACTGGTCAAGATGGGTG	(AAG)6	(AAG)6	AAG	173	176	173-176	Polymorphic													WsA8_c2862_10_aR	GTTTCTCTTTGATCTCCCATGGTGTTCT		yam_W_contig_983_a	Wc_983_aL	AAG	3	18	(AAG)	6	(AAG)6			Wc_983_aL	(AAG)6			Wc_983_aL	AAG				Wc_983_a	Wc_983_aL	173
Ws87_c5895_aL	CAGTTTTCCCAGTCACGACGTTGCTTTCTCATCACCAACCTCT	Ws87_c5895_aR	GTTTTCTACCACCACTGTCTTTGTGGAA	(CCT)6	(CCT)6	CCT	71	126	71-126	Polymorphic													Wc_1200_aR	GTTTCAGCAAAACCTTCATCCTCTGAAT		yam_W_singleton_87-01091-33_1_c5895_a	Ws87_c5895_aL	CCT	3	18	(CCT)	6	(CCT)6			Ws87_c5895_aL	(CCT)6			Ws87_c5895_aL	CCT				Ws87_c5895_a	Ws87_c5895_aL	71
Ws87_lrc4798_aL	CAGTTTTCCCAGTCACGACTGGGATCTATGCAACCTTAATTTTT	Ws87_lrc4798_aR	GTTTAGACTGCTACCAGAGCAGCG	(CCA)6	(CCA)6	CCA	0	0	-	Didn't Work													Wc_1217_aR	GTTTGAGTGATGATGGTGATGGTGAGAG		yam_W_singleton_87-01091-33_1_lrc4798_a	Ws87_lrc4798_aL	CCA	3	18	(CCA)	6	(CCA)6			Ws87_lrc4798_aL	(CCA)6			Ws87_lrc4798_aL	CCA				Ws87_lrc4798_a	Ws87_lrc4798_aL
Ws87_lrc5684_aL	CAGTTTTCCCAGTCACGACTGGAGGAGAAGCTACAGAAGTTGG	Ws87_lrc5684_aR	GTTTATATGTGGGTTCTCCACTTCCCTT	(GGT)6	(GGT)6	GGT	171	171	171-171	Monomorphic													Wc_1977_aR	GTTTCACTTCAGTGAAAATGCAGATGCT		yam_W_singleton_87-01091-33_1_lrc5684_a	Ws87_lrc5684_aL	GGT	3	18	(GGT)	6	(GGT)6			Ws87_lrc5684_aL	(GGT)6			Ws87_lrc5684_aL	GGT				Ws87_lrc5684_a	Ws87_lrc5684_aL	171
Ws87_lrc7506_aL	CAGTTTTCCCAGTCACGACGAGTCTCCAACGTCAACGCTAAG	Ws87_lrc7506_aR	GTTTCAAAGCATTTCCAGTCAACCTCTT	(CCA)6	(CCA)6	CCA	136	140	136-140	Polymorphic													Wc_2084_aR	GTTTTCTTCCACTGCTCTCAATCACAAC		yam_W_singleton_87-01091-33_1_lrc7506_a	Ws87_lrc7506_aL	CCA	3	18	(CCA)	6	(CCA)6			Ws87_lrc7506_aL	(CCA)6			Ws87_lrc7506_aL	CCA				Ws87_lrc7506_a	Ws87_lrc7506_aL	136
WsA8_c8808_3_aL	CAGTTTTCCCAGTCACGACCATTGATGTTGAGCGCATAGATGT	WsA8_c8808_3_aR	GTTTTTGTTTTGTTTGAATAATGGATGATGA	(TGA)6	(TGA)6	TGA	131	131	131-131	Monomorphic													Wc_2183_aR	GTTTCTGGCTTCTCCTCCTAATTTGGTT		yam_W_singleton_A328-33_8_c8808_3_a	WsA8_c8808_3_aL	TGA	3	18	(TGA)	6	(TGA)6			WsA8_c8808_3_aL	(TGA)6			WsA8_c8808_3_aL	TGA				WsA8_c8808_3_a	WsA8_c8808_3_aL	131
WsB9_c13520_2_aL	CAGTTTTCCCAGTCACGACGAACTCTTTGGAGCGGCTATCA	WsB9_c13520_2_aR	GTTTCTAAGCACTTCCAGCAACCTCTTC	(TTC)6	(TTC)6	TTC	157	157	157-157	Monomorphic													Wc_3404_aR	GTTTCTCCTGCACATGAAACTCATTTTG		yam_W_singleton_B310-33_9_c13520_2_a	WsB9_c13520_2_aL	TTC	3	18	(TTC)	6	(TTC)6			WsB9_c13520_2_aL	(TTC)6			WsB9_c13520_2_aL	TTC				WsB9_c13520_2_a	WsB9_c13520_2_aL	157
Wc_2185cL	CAGTTTTCCCAGTCACGACGAACAGTTCATGCACCTACCATGT	Wc_2185cR	GTTTAAGTAACAAGGTGGAGGAAGTCCC	(ATC)6	(ATC)6	ATC	157	160	157-160	Polymorphic													Wc_447_aR	GTTTATACCAGCACCAGGAATAAAACCA		yam_W_contig_2185_c	Wc_2185cL	ATC	3	18	(ATC)	6	(ATC)6			Wc_2185cL	(ATC)6			Wc_2185cL	ATC				Wc_2185c	Wc_2185cL	157
Wc_369_aL	CAGTTTTCCCAGTCACGACAGTGAGCTCATCTTCCCCAAAAA	Wc_369_aR	GTTTCTGCTGCTGATCTTTCTCATGTTC	(GAA)6	(GAA)6	GAA	176	182	176-182	Polymorphic													Wc_46_aR	GTTTCTTCCGCTGCTTTCTTATCCTCTT		yam_W_contig_369_a	Wc_369_aL	GAA	3	18	(GAA)	6	(GAA)6			Wc_369_aL	(GAA)6			Wc_369_aL	GAA				Wc_369_a	Wc_369_aL	176
Wc_5258cL	CAGTTTTCCCAGTCACGACTCCGGATAGGAACCCTATAGCATC	Wc_5258cR	GTTTATTATCTTCGTCTCCACCTCCTCC	(CGG)6	(CGG)6	CGG	124	398	124-398	Polymorphic													Wc_4696_aR	GTTTATTCCAGGAACACAGCTACTGCAT		yam_W_contig_5258_c	Wc_5258cL	CGG	3	18	(CGG)	6	(CGG)6			Wc_5258cL	(CGG)6			Wc_5258cL	CGG				Wc_5258c	Wc_5258cL	124
Wc_5523_bL	CAGTTTTCCCAGTCACGACGTACACCCAAGAAGGAGGATGAGG	Wc_5523_bR	GTTTAGTAAACCCGTTTCTTCACCGAGT	(AGA)6	(AGA)6	AGA	130	133	130-133	Polymorphic													Wc_4909_aR	GTTTAACTCAGATAGCAACAGTGAGGGG		yam_W_contig_5523_b	Wc_5523_bL	AGA	3	18	(AGA)	6	(AGA)6			Wc_5523_bL	(AGA)6			Wc_5523_bL	AGA				Wc_5523_b	Wc_5523_bL	130
Wc_6261_aL	CAGTTTTCCCAGTCACGACGACTTCGATCTCTCCACCAAAATC	Wc_6261_aR	GTTTCGTTTACATTGCGTGATAAGCATC	(GAA)6	(GAA)6	GAA	162	162	162-162	Monomorphic													Wc_531_aR	GTTTGGCATGGAGGCAAGGACTTC		yam_W_contig_6261_a	Wc_6261_aL	GAA	3	18	(GAA)	6	(GAA)6			Wc_6261_aL	(GAA)6			Wc_6261_aL	GAA				Wc_6261_a	Wc_6261_aL	162
Wc_1747_aL	CAGTTTTCCCAGTCACGACATCGAGAGAAGGGAAGGGAGG	Wc_1747_aR	GTTTTTCCACTCTCTCCTGAAGAACACC	(GA)8	(GA)8	GA	116	118	116-118	Polymorphic													Wc_5485_aR	GTTTAAGCTCTCCCTCAAAACCCTAGAA		yam_W_contig_1747_a	Wc_1747_aL	GA	2	16	(GA)	8	(GA)8			Wc_1747_aL	(GA)8			Wc_1747_aL	GA				Wc_1747_a	Wc_1747_aL	116
Wc_1036_aL	CAGTTTTCCCAGTCACGACTCTACTCCCTCATGAGATCCTTGC	Wc_1036_aR	GTTTTTACCTAGCTTCAAAACGTCCTGC	(TGA)5	(TGA)5	TGA	141	141	141-141	Monomorphic													Wc_962_aR	GTTTACAAGAAAAGAAGCCATGAAACCA		yam_W_contig_1036_a	Wc_1036_aL	TGA	3	15	(TGA)	5	(TGA)5			Wc_1036_aL	(TGA)5			Wc_1036_aL	TGA				Wc_1036_a	Wc_1036_aL	141
Wc_1972_aL	CAGTTTTCCCAGTCACGACTCACCAAAAGGATTAGATGCGATT	Wc_1972_aR	GTTTGTTCAAATGGCTGCTATGGCTC	(TTG)5	(TTG)5	TTG	170	173	170-173	Polymorphic													Ws87_c7372_aR	GTTTGGAGTCGACGATGGAGTTAGAGG		yam_W_contig_1972_a	Wc_1972_aL	TTG	3	15	(TTG)	5	(TTG)5			Wc_1972_aL	(TTG)5			Wc_1972_aL	TTG				Wc_1972_a	Wc_1972_aL	170
Wc_215_aL	CAGTTTTCCCAGTCACGACCCAGGTCTGACAAGTACTGGGG	Wc_215_aR	GTTTAACCAGTGGGTTTCGTTCAGC	(CTC)5	(CTC)5	CTC	162	165	162-165	Polymorphic													Ws87_c7600_aR	GTTTTTCCAATTCGATCAAATCATTCCT		yam_W_contig_215_a	Wc_215_aL	CTC	3	15	(CTC)	5	(CTC)5			Wc_215_aL	(CTC)5			Wc_215_aL	CTC				Wc_215_a	Wc_215_aL	162
Wc_2251_aL	CAGTTTTCCCAGTCACGACCTCGATGCCTTTGTTGGACTCT	Wc_2251_aR	GTTTTCCTCATCTTCATCCTGGCATATT	(AGA)5	(AGA)5	AGA	160	160	160-160	Monomorphic													Ws87_lrc3111_aR	GTTTCACCGAATGGCACATACTTGAC		yam_W_contig_2251_a	Wc_2251_aL	AGA	3	15	(AGA)	5	(AGA)5			Wc_2251_aL	(AGA)5			Wc_2251_aL	AGA				Wc_2251_a	Wc_2251_aL	160
Wc_2471_bL	CAGTTTTCCCAGTCACGACACAATGAATATGTGCTCCAAATGC	Wc_2471_bR	GTTTCCACAACATCAGTAACAACAGGCT	(GCA)5	(GCA)5	GCA	175	178	175-178	Polymorphic													WsA8_c10812_2_aR	GTTTGCAGCAAACCAAAGACCTGATAGT		yam_W_contig_2471_b	Wc_2471_bL	GCA	3	15	(GCA)	5	(GCA)5			Wc_2471_bL	(GCA)5			Wc_2471_bL	GCA				Wc_2471_b	Wc_2471_bL	175
Wc_2511_aL	CAGTTTTCCCAGTCACGACCAGGATAGAAAATCCAAAGGGGTT	Wc_2511_aR	GTTTAGTCCCAATTGCTTTCTCCAAAAT	(TGA)5	(TGA)5	TGA	161	161	161-161	Monomorphic													WsA8_c9061_3_aR	GTTTAAACCGAAGCATCCTGATTTGATA		yam_W_contig_2511_a	Wc_2511_aL	TGA	3	15	(TGA)	5	(TGA)5			Wc_2511_aL	(TGA)5			Wc_2511_aL	TGA				Wc_2511_a	Wc_2511_aL	161
Wc_2602_bL	CAGTTTTCCCAGTCACGACTCTACTGCAAAGCTTGCAAAATCA	Wc_2602_bR	GTTTGTGGTGGTGGGTCAGGTTTTT	(CCT)5	(CCT)5	CCT	98	98	98-98	Monomorphic													Wc_1967_aR	GTTTCTTCCTTTAACTTGTTTCTGCCCA		yam_W_contig_2602_b	Wc_2602_bL	CCT	3	15	(CCT)	5	(CCT)5			Wc_2602_bL	(CCT)5			Wc_2602_bL	CCT				Wc_2602_b	Wc_2602_bL	98
Wc_2691_aL	CAGTTTTCCCAGTCACGACGAAGATGGTGTCATGGAAGAAGGT	Wc_2691_aR	GTTTATTTATCACCCATGATGATTGCCT	(GAA)5	(GAA)5	GAA	63	137	63-137	Polymorphic													Wc_1996_aR	GTTTGAATAACACTCCTTTGATCCCTTCAA		yam_W_contig_2691_a	Wc_2691_aL	GAA	3	15	(GAA)	5	(GAA)5			Wc_2691_aL	(GAA)5			Wc_2691_aL	GAA				Wc_2691_a	Wc_2691_aL	63
Wc_2697_bL	CAGTTTTCCCAGTCACGACCAAGGGATTGAGAGGAAGATGAAG	Wc_2697_bR	GTTTCCAACTTCAACATGAAATCCAAGA	(AGG)5	(AGG)5	AGG	157	166	157-166	Polymorphic													Wc_2191_bR	GTTTAGTTTGGGGTCGAAAATCCAGTAG		yam_W_contig_2697_b	Wc_2697_bL	AGG	3	15	(AGG)	5	(AGG)5			Wc_2697_bL	(AGG)5			Wc_2697_bL	AGG				Wc_2697_b	Wc_2697_bL	157
Wc_278_aL	CAGTTTTCCCAGTCACGACGATCCAGAGGCAACAGCATCTACT	Wc_278_aR	GTTTTGAAAACCCTTGAACTTGATGAGC	(TGA)5	(TGA)5	TGA	157	157	157-157	Monomorphic													Wc_3810_aR	GTTTCCTCCTGTCCTTCACTTTTGATGT		yam_W_contig_278_a	Wc_278_aL	TGA	3	15	(TGA)	5	(TGA)5			Wc_278_aL	(TGA)5			Wc_278_aL	TGA				Wc_278_a	Wc_278_aL	157
Wc_2837_aL	CAGTTTTCCCAGTCACGACATGTGGAAAAACACACATTGTTGG	Wc_2837_aR	GTTTTATTTGTTCAGAAGCTCAGGTCCC	(TGC)5	(TGC)5	TGC	107	110	107-110	Polymorphic													Wc_3915_aR	GTTTCGGTCCGAGTATCTTCACTTCAAT		yam_W_contig_2837_a	Wc_2837_aL	TGC	3	15	(TGC)	5	(TGC)5			Wc_2837_aL	(TGC)5			Wc_2837_aL	TGC				Wc_2837_a	Wc_2837_aL	107
Wc_300_aL	CAGTTTTCCCAGTCACGACAAGATGATCGAAATCCATACCGAA	Wc_300_aR	GTTTAGCCTGATCTCACCATCGAGAC	(CTG)5	(CTG)5	CTG	156	156	156-156	Monomorphic													Wc_422_aR	GTTTCGGTGAAGCATGTAAAATGCAGTA		yam_W_contig_300_a	Wc_300_aL	CTG	3	15	(CTG)	5	(CTG)5			Wc_300_aL	(CTG)5			Wc_300_aL	CTG				Wc_300_a	Wc_300_aL	156
Wc_3078_aL	CAGTTTTCCCAGTCACGACAGCTGACGTATGATGAGAGGAAGG	Wc_3078_aR	GTTTACGAAACTGGCAAGCTTAGTCATC	(GAT)5	(GAT)5	GAT	134	134	134-134	Monomorphic													Wc_4410_aR	GTTTTGCAAACTACTCCTTTTGGGACAT		yam_W_contig_3078_a	Wc_3078_aL	GAT	3	15	(GAT)	5	(GAT)5			Wc_3078_aL	(GAT)5			Wc_3078_aL	GAT				Wc_3078_a	Wc_3078_aL	134
Wc_349_aL	CAGTTTTCCCAGTCACGACGATTTCAACTCCATTGCTTTCCTG	Wc_349_aR	GTTTTAAACTTCAGTCAGACCACCACCA	(GGT)5	(GGT)5	GGT	66	301	66-301	Polymorphic													Wc_5003_aR	GTTTCGATCCACTCTTCAAGGTCAAGAT		yam_W_contig_349_a	Wc_349_aL	GGT	3	15	(GGT)	5	(GGT)5			Wc_349_aL	(GGT)5			Wc_349_aL	GGT				Wc_349_a	Wc_349_aL	66
Wc_36_aL	CAGTTTTCCCAGTCACGACGCATACCAGCACATGTATGCTCAG	Wc_36_aR	GTTTCAGCCTTCATGATCTTCTTGATCC	(CAG)5	(CAG)5	CAG	172	172	172-172	Monomorphic													Wc_5531_aR	GTTTGTATTGCTGGAACCTGGAGATAGC		yam_W_contig_36_a	Wc_36_aL	CAG	3	15	(CAG)	5	(CAG)5			Wc_36_aL	(CAG)5			Wc_36_aL	CAG				Wc_36_a	Wc_36_aL	172
Wc_3784_aL	CAGTTTTCCCAGTCACGACATCACTAATGTGGCTCTTGCCATT	Wc_3784_aR	GTTTCATCAAGAGGAAACTAGCTGCACA	(CTC)5	(CTC)5	CTC	183	183	183-183	Monomorphic													Wc_5598_aR	GTTTATCCTAGAGATGCCTTCCCTTGTC		yam_W_contig_3784_a	Wc_3784_aL	CTC	3	15	(CTC)	5	(CTC)5			Wc_3784_aL	(CTC)5			Wc_3784_aL	CTC				Wc_3784_a	Wc_3784_aL	183
Wc_4034_aL	CAGTTTTCCCAGTCACGACGAGTGGAGGAGTTGGAAGTGAGTC	Wc_4034_aR	GTTTGGATAAGAAGCAAGTCTCCCCATT	(GAT)5	(GAT)5	GAT	268	268	268-268	Monomorphic													Wc_6250_aR	GTTTCAAGGCCAGATCATAACCACTTCT		yam_W_contig_4034_a	Wc_4034_aL	GAT	3	15	(GAT)	5	(GAT)5			Wc_4034_aL	(GAT)5			Wc_4034_aL	GAT				Wc_4034_a	Wc_4034_aL	268
Wc_4114_aL	CAGTTTTCCCAGTCACGACCAAAACGAAAAGATGGAGATGGTC	Wc_4114_aR	GTTTTTTCATCAAGGACTTGGTTCACAA	(GAA)5	(GAA)5	GAA	53	53	53-53	Monomorphic													Wc_7014_aR	GTTTCGAAACTACCACCACCGGTAACTA		yam_W_contig_4114_a	Wc_4114_aL	GAA	3	15	(GAA)	5	(GAA)5			Wc_4114_aL	(GAA)5			Wc_4114_aL	GAA				Wc_4114_a	Wc_4114_aL	53
Wc_4973_aL	CAGTTTTCCCAGTCACGACGATTTTAAGAAGAGGCATGGTTCG	Wc_4973_aR	GTTTATCATTGAACTCCTGGAAATCAGC	(GAT)5	(GAT)5	GAT	142	142	142-142	Monomorphic													Wc_775_aR	GTTTTTTGAGCGCATATCAGACATGAAG		yam_W_contig_4973_a	Wc_4973_aL	GAT	3	15	(GAT)	5	(GAT)5			Wc_4973_aL	(GAT)5			Wc_4973_aL	GAT				Wc_4973_a	Wc_4973_aL	142
Wc_5349_aL	CAGTTTTCCCAGTCACGACTGGGTGTGGTTAATGAGTCTTGTG	Wc_5349_aR	GTTTTTGTTCATGGGAACCAAATATTCC	(CAG)5	(CAG)5	CAG	151	155	151-155	Polymorphic													Wc_777_aR	GTTTTTCTAATGCATTGGTTTCAGGCTT		yam_W_contig_5349_a	Wc_5349_aL	CAG	3	15	(CAG)	5	(CAG)5			Wc_5349_aL	(CAG)5			Wc_5349_aL	CAG				Wc_5349_a	Wc_5349_aL	151
Wc_5515_aL	CAGTTTTCCCAGTCACGACCTGGATTCTCCGACATTTAGATCG	Wc_5515_aR	GTTTGAAAACTAGTCACCCGCTTGAGAA	(ACC)5	(ACC)5	ACC	157	160	157-160	Polymorphic													WsB9_c11432_2_aR	GTTTAAAGTCCATCTGCTTGCTCTCATC		yam_W_contig_5515_a	Wc_5515_aL	ACC	3	15	(ACC)	5	(ACC)5			Wc_5515_aL	(ACC)5			Wc_5515_aL	ACC				Wc_5515_a	Wc_5515_aL	157
Wc_5539_aL	CAGTTTTCCCAGTCACGACTTTATCAGAGCTTTTCTGCTACCGA	Wc_5539_aR	GTTTCCAATAGACCAACACCAAACATCA	(GAA)5	(GAA)5	GAA	166	169	166-169	Polymorphic													Wc_3780_aR	GTTTTGTTTGCATGATTTCTTGGTTTTG		yam_W_contig_5539_a	Wc_5539_aL	GAA	3	15	(GAA)	5	(GAA)5			Wc_5539_aL	(GAA)5			Wc_5539_aL	GAA				Wc_5539_a	Wc_5539_aL	166
Wc_5986_aL	CAGTTTTCCCAGTCACGACACCTACATGCCAACACAGTCTTCA	Wc_5986_aR	GTTTCGGTCGTCTATGATAGTAGGAAGCA	(GCT)5	(GCT)5	GCT	118	121	118-121	Polymorphic													Wc_4446_aR	GTTTTATTCTTGGGGGAGGATCTACACA		yam_W_contig_5986_a	Wc_5986_aL	GCT	3	15	(GCT)	5	(GCT)5			Wc_5986_aL	(GCT)5			Wc_5986_aL	GCT				Wc_5986_a	Wc_5986_aL	118
Wc_616_aL	CAGTTTTCCCAGTCACGACGAGCCGTACAAGAGTGCGAAAT	Wc_616_aR	GTTTGAAGCTCTGGAGGTTCTTCTCCTC	(AAG)5	(AAG)5	AAG	158	170	158-170	Polymorphic													Wc_4844_aR	GTTTCACAACCACCAACTAACCAAACAA		yam_W_contig_616_a	Wc_616_aL	AAG	3	15	(AAG)	5	(AAG)5			Wc_616_aL	(AAG)5			Wc_616_aL	AAG				Wc_616_a	Wc_616_aL	158
Wc_6416_aL	CAGTTTTCCCAGTCACGACCCATCAGTGGACTTTCTCAGTCCT	Wc_6416_aR	GTTTGATGTGCACAAAAGGATACGAGTG	(GCA)5	(GCA)5	GCA	0	0	-	Didn't Work													Wc_1665_aR	GTTTTCTGGAAGAGCACAGAGGAAAGAT		yam_W_contig_6416_a	Wc_6416_aL	GCA	3	15	(GCA)	5	(GCA)5			Wc_6416_aL	(GCA)5			Wc_6416_aL	GCA				Wc_6416_a	Wc_6416_aL
Wc_6678_aL	CAGTTTTCCCAGTCACGACACAGAGAACAACATGGGTTTCACA	Wc_6678_aR	GTTTAACACCATTCCAAGCTACATCCAT	(GGT)5	(GGT)5	GGT	127	147	127-147	Polymorphic													Wc_2151_aR	GTTTGCCGGAGGAATTATTGTTTTGTTT		yam_W_contig_6678_a	Wc_6678_aL	GGT	3	15	(GGT)	5	(GGT)5			Wc_6678_aL	(GGT)5			Wc_6678_aL	GGT				Wc_6678_a	Wc_6678_aL	127
Wc_7052_aL	CAGTTTTCCCAGTCACGACGAAACACAACCATGATGTACCAGC	Wc_7052_aR	GTTTGCTTGGTGATGATTATTCTTTCGG	(GCT)5	(GCT)5	GCT	179	184	179-184	Polymorphic													Wc_2196_bR	GTTTGATTCATCCTCCATCGTCGATTT		yam_W_contig_7052_a	Wc_7052_aL	GCT	3	15	(GCT)	5	(GCT)5			Wc_7052_aL	(GCT)5			Wc_7052_aL	GCT				Wc_7052_a	Wc_7052_aL	179
Wc_7189_aL	CAGTTTTCCCAGTCACGACTTCTCCTTGATGTCTCATGACCTG	Wc_7189_aR	GTTTTAGCAGACATGATAGTGACCGACG	(TGG)5	(TGG)5	TGG	319	319	319-319	Monomorphic													Wc_2431_aR	GTTTGAACAAATCCATTGCTTTAGTGGC		yam_W_contig_7189_a	Wc_7189_aL	TGG	3	15	(TGG)	5	(TGG)5			Wc_7189_aL	(TGG)5			Wc_7189_aL	TGG				Wc_7189_a	Wc_7189_aL	319
Wc_7424_aL	CAGTTTTCCCAGTCACGACAAGGATGAAGAAGCCAAACCCTAC	Wc_7424_aR	GTTTGAGTTCCACACTTGTTGTTGATGC	(CTT)5	(CTT)5	CTT	223	267	223-267	Polymorphic													Wc_2435_aR	GTTTAGTCAAACCCTCTAAAAACCGAGC		yam_W_contig_7424_a	Wc_7424_aL	CTT	3	15	(CTT)	5	(CTT)5			Wc_7424_aL	(CTT)5			Wc_7424_aL	CTT				Wc_7424_a	Wc_7424_aL	223
Wc_818_aL	CAGTTTTCCCAGTCACGACGATACCCGTTGCGTGCTGTC	Wc_818_aR	GTTTATACCCGAAGTGCTAGCAAGATCA	(GAG)5	(GAG)5	GAG	178	178	178-178	Monomorphic																yam_W_contig_818_a	Wc_818_aL	GAG	3	15	(GAG)	5	(GAG)5			Wc_818_aL	(GAG)5			Wc_818_aL	GAG				Wc_818_a	Wc_818_aL	178
Wc_946_aL	CAGTTTTCCCAGTCACGACGAAGAAGGCGGAGACCTTCAA	Wc_946_aR	GTTTTCTACTCTCCGGTTCAGATCATCC	(GCA)5	(GCA)5	GCA	127	130	127-130	Polymorphic													Wc_3717_aL	CAGTTTTCCCAGTCACGACTATGAATGATGATGGAGCTGGAGA		yam_W_contig_946_a	Wc_946_aL	GCA	3	15	(GCA)	5	(GCA)5			Wc_946_aL	(GCA)5			Wc_946_aL	GCA				Wc_946_a	Wc_946_aL	127
Wc_961_aL	CAGTTTTCCCAGTCACGACCTTCGTTGAAGAGTGATGGTGTTG	Wc_961_aR	GTTTACTCATCTCAACATCCGGTCTCA	(GCC)5	(GCC)5	GCC	169	169	169-169	Monomorphic													Wc_404_aL	CAGTTTTCCCAGTCACGACGTAGGACTCGTCGTAGACCCAAGA		yam_W_contig_961_a	Wc_961_aL	GCC	3	15	(GCC)	5	(GCC)5			Wc_961_aL	(GCC)5			Wc_961_aL	GCC				Wc_961_a	Wc_961_aL	169
Ws87_c10411_aL	CAGTTTTCCCAGTCACGACATTAAAGTCGCACAACCCAAAGAG	Ws87_c10411_aR	GTTTTCCAACTTTGGCTTTGACCTCTAC	(AGC)5	(AGC)5	AGC	0	0	-	Didn't Work													Wc_5962_aL	CAGTTTTCCCAGTCACGACTGTCCATCTTTGTCCTCTTCTTCC		yam_W_singleton_87-01091-33_1_c10411_a	Ws87_c10411_aL	AGC	3	15	(AGC)	5	(AGC)5			Ws87_c10411_aL	(AGC)5			Ws87_c10411_aL	AGC				Ws87_c10411_a	Ws87_c10411_aL
Ws87_c4466_aL	CAGTTTTCCCAGTCACGACGATGCTCGGTTAACGGTAAAGTTG	Ws87_c4466_aR	GTTTGATATATCACCCCCTCCAAACTCTG	(AGG)5	(AGG)5	AGG	101	101	101-101	Monomorphic													Wc_6200_aL	CAGTTTTCCCAGTCACGACAAATCGCACAACTACCAAAATGCT		yam_W_singleton_87-01091-33_1_c4466_a	Ws87_c4466_aL	AGG	3	15	(AGG)	5	(AGG)5			Ws87_c4466_aL	(AGG)5			Ws87_c4466_aL	AGG				Ws87_c4466_a	Ws87_c4466_aL	101
Ws87_c4471_aL	CAGTTTTCCCAGTCACGACTTTATAGTGGCTCAAATGGCAATG	Ws87_c4471_aR	GTTTTCTATGGTAATATTGTGGGGCAGG	(ACC)5	(ACC)5	ACC	158	163	158-163	Polymorphic													Wc_6827_aL	CAGTTTTCCCAGTCACGACTAATATTCAGCTTGCATGGAGACG		yam_W_singleton_87-01091-33_1_c4471_a	Ws87_c4471_aL	ACC	3	15	(ACC)	5	(ACC)5			Ws87_c4471_aL	(ACC)5			Ws87_c4471_aL	ACC				Ws87_c4471_a	Ws87_c4471_aL	158
Ws87_c4688_bL	CAGTTTTCCCAGTCACGACGTTCTCCTTCCTCCCATCAACTTT	Ws87_c4688_bR	GTTTGAAACAACCCGGACTTTGGTTTAG	(AGG)5	(AGG)5	AGG	209	212	209-212	Polymorphic													Wc_75_aL	CAGTTTTCCCAGTCACGACGAGGAGAAGGAGAAGAAGTCTGTCG		yam_W_singleton_87-01091-33_1_c4688_b	Ws87_c4688_bL	AGG	3	15	(AGG)	5	(AGG)5			Ws87_c4688_bL	(AGG)5			Ws87_c4688_bL	AGG				Ws87_c4688_b	Ws87_c4688_bL	209
Ws87_c6429_aL	CAGTTTTCCCAGTCACGACGATGGCGGAGTTGTGATGAATAA	Ws87_c6429_aR	GTTTATTGACAGCACAACAAGATCCTCC	(CGG)5	(CGG)5	CGG	134	134	134-134	Monomorphic													Wc_983_aL	CAGTTTTCCCAGTCACGACTACTAGAATGGCCAAAGGAGTGGA		yam_W_singleton_87-01091-33_1_c6429_a	Ws87_c6429_aL	CGG	3	15	(CGG)	5	(CGG)5			Ws87_c6429_aL	(CGG)5			Ws87_c6429_aL	CGG				Ws87_c6429_a	Ws87_c6429_aL	134
Ws87_c7137_aL	CAGTTTTCCCAGTCACGACCTCAATCATCACCTTCGTCCTCTT	Ws87_c7137_aR	GTTTCTTCTTCACCCCACCTACTCCTCT	(GCA)5	(GCA)5	GCA	152	152	152-152	Monomorphic													Ws87_c5895_aL	CAGTTTTCCCAGTCACGACGTTGCTTTCTCATCACCAACCTCT		yam_W_singleton_87-01091-33_1_c7137_a	Ws87_c7137_aL	GCA	3	15	(GCA)	5	(GCA)5			Ws87_c7137_aL	(GCA)5			Ws87_c7137_aL	GCA				Ws87_c7137_a	Ws87_c7137_aL	152
Ws87_c7312_aL	CAGTTTTCCCAGTCACGACAACAAACAACTCCTCAAGATTCGC	Ws87_c7312_aR	GTTTGTATGAAATGGGATCTAGGAGGGC	(CTC)5	(CTC)5	CTC	165	165	165-165	Monomorphic													Ws87_lrc4798_aL	CAGTTTTCCCAGTCACGACTGGGATCTATGCAACCTTAATTTTT		yam_W_singleton_87-01091-33_1_c7312_a	Ws87_c7312_aL	CTC	3	15	(CTC)	5	(CTC)5			Ws87_c7312_aL	(CTC)5			Ws87_c7312_aL	CTC				Ws87_c7312_a	Ws87_c7312_aL	165
Ws87_c7809_aL	CAGTTTTCCCAGTCACGACACTAGAATCACTGTCCGACGATCC	Ws87_c7809_aR	GTTTCTCCAACTCCAACTCGACTCTCTC	(CCT)5	(CCT)5	CCT	257	274	257-274	Polymorphic													Ws87_lrc5684_aL	CAGTTTTCCCAGTCACGACTGGAGGAGAAGCTACAGAAGTTGG		yam_W_singleton_87-01091-33_1_c7809_a	Ws87_c7809_aL	CCT	3	15	(CCT)	5	(CCT)5			Ws87_c7809_aL	(CCT)5			Ws87_c7809_aL	CCT				Ws87_c7809_a	Ws87_c7809_aL	257
Ws87_lrc1697_aL	CAGTTTTCCCAGTCACGACTCATTAAGGTTTGGTGAAGTGGGT	Ws87_lrc1697_aR	GTTTGTTGGTCTTCAAGTTCTTGTGGG	(AAG)5	(AAG)5	AAG	171	171	171-171	Monomorphic													Ws87_lrc7506_aL	CAGTTTTCCCAGTCACGACGAGTCTCCAACGTCAACGCTAAG		yam_W_singleton_87-01091-33_1_lrc1697_a	Ws87_lrc1697_aL	AAG	3	15	(AAG)	5	(AAG)5			Ws87_lrc1697_aL	(AAG)5			Ws87_lrc1697_aL	AAG				Ws87_lrc1697_a	Ws87_lrc1697_aL	171
WsA8_c10477_2_aL	CAGTTTTCCCAGTCACGACTGAGATTTTGGAAGGCCAGAATAG	WsA8_c10477_2_aR	GTTTATGCTCCAGTTTGAGAATGTAGGG	(TCA)5	(TCA)5	TCA	0	0	-	Didn't Work													WsA8_c8808_3_aL	CAGTTTTCCCAGTCACGACCATTGATGTTGAGCGCATAGATGT		yam_W_singleton_A328-33_8_c10477_2_a	WsA8_c10477_2_aL	TCA	3	15	(TCA)	5	(TCA)5			WsA8_c10477_2_aL	(TCA)5			WsA8_c10477_2_aL	TCA				WsA8_c10477_2_a	WsA8_c10477_2_aL
WsA8_c13246_2_aL	CAGTTTTCCCAGTCACGACCGATTAAATGATCACCTTGTGGAA	WsA8_c13246_2_aR	GTTTTAGGTCTGGAGAGGAAGGATTGAA	(ACC)5	(ACC)5	ACC	0	0	-	Didn't Work													WsB9_c13520_2_aL	CAGTTTTCCCAGTCACGACGAACTCTTTGGAGCGGCTATCA		yam_W_singleton_A328-33_8_c13246_2_a	WsA8_c13246_2_aL	ACC	3	15	(ACC)	5	(ACC)5			WsA8_c13246_2_aL	(ACC)5			WsA8_c13246_2_aL	ACC				WsA8_c13246_2_a	WsA8_c13246_2_aL
WsA8_c14051_2_aL	CAGTTTTCCCAGTCACGACTGAATGGGATGACGAGGATTG	WsA8_c14051_2_aR	GTTTATTACAAGAAGATCCTCAACCCCA	(CGG)5	(CGG)5	CGG	160	160	160-160	Monomorphic													Wc_2185cL	CAGTTTTCCCAGTCACGACGAACAGTTCATGCACCTACCATGT		yam_W_singleton_A328-33_8_c14051_2_a	WsA8_c14051_2_aL	CGG	3	15	(CGG)	5	(CGG)5			WsA8_c14051_2_aL	(CGG)5			WsA8_c14051_2_aL	CGG				WsA8_c14051_2_a	WsA8_c14051_2_aL	160
WsA8_c4604_9_aL	CAGTTTTCCCAGTCACGACGTGATGATCGATTGAAAAGGGAAC	WsA8_c4604_9_aR	GTTTCAGAGGTATTGCACACTGAACCAG	(GCA)5	(GCA)5	GCA	290	290	290-290	Monomorphic													Wc_369_aL	CAGTTTTCCCAGTCACGACAGTGAGCTCATCTTCCCCAAAAA		yam_W_singleton_A328-33_8_c4604_9_a	WsA8_c4604_9_aL	GCA	3	15	(GCA)	5	(GCA)5			WsA8_c4604_9_aL	(GCA)5			WsA8_c4604_9_aL	GCA				WsA8_c4604_9_a	WsA8_c4604_9_aL	290
WsA8_c8305_3_aL	CAGTTTTCCCAGTCACGACCGTTTGCAAGGAGGAGTTCTTGT	WsA8_c8305_3_aR	GTTTTTCACTGTGATAGCAATGTGAGCA	(GGA)5	(GGA)5	GGA	106	106	106-106	Monomorphic													Wc_5258cL	CAGTTTTCCCAGTCACGACTCCGGATAGGAACCCTATAGCATC		yam_W_singleton_A328-33_8_c8305_3_a	WsA8_c8305_3_aL	GGA	3	15	(GGA)	5	(GGA)5			WsA8_c8305_3_aL	(GGA)5			WsA8_c8305_3_aL	GGA				WsA8_c8305_3_a	WsA8_c8305_3_aL	106
WsA8_c8655_3_aL	CAGTTTTCCCAGTCACGACATATTTATGAGATTGCAAGGCGGA	WsA8_c8655_3_aR	GTTTTCTCTCCCATAGTTTTCTCAGGCA	(GAT)5	(GAT)5	GAT	129	129	129-129	Monomorphic													Wc_5523_bL	CAGTTTTCCCAGTCACGACGTACACCCAAGAAGGAGGATGAGG		yam_W_singleton_A328-33_8_c8655_3_a	WsA8_c8655_3_aL	GAT	3	15	(GAT)	5	(GAT)5			WsA8_c8655_3_aL	(GAT)5			WsA8_c8655_3_aL	GAT				WsA8_c8655_3_a	WsA8_c8655_3_aL	129
WsB9_c10540_2_aL	CAGTTTTCCCAGTCACGACTAGGAAGGTAGTTACCGACCCTGG	WsB9_c10540_2_aR	GTTTCTTTCTGGGCTGTTCCCACC	(CGG)5	(CGG)5	CGG	169	169	169-169	Monomorphic													Wc_6261_aL	CAGTTTTCCCAGTCACGACGACTTCGATCTCTCCACCAAAATC		yam_W_singleton_B310-33_9_c10540_2_a	WsB9_c10540_2_aL	CGG	3	15	(CGG)	5	(CGG)5			WsB9_c10540_2_aL	(CGG)5			WsB9_c10540_2_aL	CGG				WsB9_c10540_2_a	WsB9_c10540_2_aL	169
WsB9_c15149_2_aL	CAGTTTTCCCAGTCACGACCTTGACCCCTCTCACATCCTTCT	WsB9_c15149_2_aR	GTTTGAATCAGTGTGGTTGAAGCTGAGA	(CTC)5	(CTC)5	CTC	171	171	171-171	Monomorphic													Wc_1747_aL	CAGTTTTCCCAGTCACGACATCGAGAGAAGGGAAGGGAGG		yam_W_singleton_B310-33_9_c15149_2_a	WsB9_c15149_2_aL	CTC	3	15	(CTC)	5	(CTC)5			WsB9_c15149_2_aL	(CTC)5			WsB9_c15149_2_aL	CTC				WsB9_c15149_2_a	WsB9_c15149_2_aL	171
Wc_2285_bL	CAGTTTTCCCAGTCACGACCTGTCTCTTCACCAAACAAATCCA	Wc_2285_bR	GTTTCAGGGAGTCACAATTTCAGGATCT	(CAT)5	(CAT)5	CAT	0	0	-	Didn't Work													Wc_1036_aL	CAGTTTTCCCAGTCACGACTCTACTCCCTCATGAGATCCTTGC		yam_W_contig_2285_b	Wc_2285_bL	CAT	3	15	(CAT)	5	(CAT)5			Wc_2285_bL	(CAT)5			Wc_2285_bL	CAT				Wc_2285_b	Wc_2285_bL
Wc_3031_bL	CAGTTTTCCCAGTCACGACCAGCCCACTTCTTCGATGTGAT	Wc_3031_bR	GTTTATCTCAGTAGCTCCAATGGGTTTG	(CTT)5	(CTT)5	CTT	182	182	182-182	Monomorphic													Wc_1972_aL	CAGTTTTCCCAGTCACGACTCACCAAAAGGATTAGATGCGATT		yam_W_contig_3031_b	Wc_3031_bL	CTT	3	15	(CTT)	5	(CTT)5			Wc_3031_bL	(CTT)5			Wc_3031_bL	CTT				Wc_3031_b	Wc_3031_bL	182
Wc_5474_aL	CAGTTTTCCCAGTCACGACAGCCAACAAGAATCAAAACCAAAA	Wc_5474_aR	GTTTTGATGATGATGGTTCCTTCACTGT	(CCT)5	(CCT)5	CCT	135	138	135-138	Polymorphic													Wc_215_aL	CAGTTTTCCCAGTCACGACCCAGGTCTGACAAGTACTGGGG		yam_W_contig_5474_a	Wc_5474_aL	CCT	3	15	(CCT)	5	(CCT)5			Wc_5474_aL	(CCT)5			Wc_5474_aL	CCT				Wc_5474_a	Wc_5474_aL	135
Wc_5905_bL	CAGTTTTCCCAGTCACGACGGTGTATGATCAGTATGGGGAGGA	Wc_5905_bR	GTTTAGAACTCGGCAAATATATCATCGG	(TGG)5	(TGG)5	TGG	167	167	167-167	Monomorphic													Wc_2251_aL	CAGTTTTCCCAGTCACGACCTCGATGCCTTTGTTGGACTCT		yam_W_contig_5905_b	Wc_5905_bL	TGG	3	15	(TGG)	5	(TGG)5			Wc_5905_bL	(TGG)5			Wc_5905_bL	TGG				Wc_5905_b	Wc_5905_bL	167
Wc_6254_bL	CAGTTTTCCCAGTCACGACACATTTTTGCGGCACTTGAGAC	Wc_6254_bR	GTTTTCTTCAACATCAGCCCATTTCTTT	(GAA)5	(GAA)5	GAA	178	178	178-178	Monomorphic													Wc_2471_bL	CAGTTTTCCCAGTCACGACACAATGAATATGTGCTCCAAATGC		yam_W_contig_6254_b	Wc_6254_bL	GAA	3	15	(GAA)	5	(GAA)5			Wc_6254_bL	(GAA)5			Wc_6254_bL	GAA				Wc_6254_b	Wc_6254_bL	178
Wc_1005_bL	CAGTTTTCCCAGTCACGACTGTGAAGAGAGTGATCTCAAGGGA	Wc_1005_bR	GTTTTTCCTTCTCCTTCTCCTTCTCCTC	(TGA)4	(TGA)4	TGA	0	0	-	Didn't Work													Wc_2511_aL	CAGTTTTCCCAGTCACGACCAGGATAGAAAATCCAAAGGGGTT		yam_W_contig_1005_b	Wc_1005_bL	TGA	3	12	(TGA)	4	(TGA)4			Wc_1005_bL	(TGA)4			Wc_1005_bL	TGA				Wc_1005_b	Wc_1005_bL
Wc_1013_bL	CAGTTTTCCCAGTCACGACGGTGGTGATACCAGTCACAGTCAA	Wc_1013_bR	GTTTTTCAACCAGAATTCATCATCCTCA	(TGA)4	(TGA)4	TGA	159	173	159-173	Polymorphic													Wc_2602_bL	CAGTTTTCCCAGTCACGACTCTACTGCAAAGCTTGCAAAATCA		yam_W_contig_1013_b	Wc_1013_bL	TGA	3	12	(TGA)	4	(TGA)4			Wc_1013_bL	(TGA)4			Wc_1013_bL	TGA				Wc_1013_b	Wc_1013_bL	159
Wc_1022_aL	CAGTTTTCCCAGTCACGACCTCACTACCACTAAACCCACCACC	Wc_1022_aR	GTTTCTTATCACTGCACATGCCAAAGTT	(AGA)4	(AGA)4	AGA	218	218	218-218	Monomorphic													Wc_2691_aL	CAGTTTTCCCAGTCACGACGAAGATGGTGTCATGGAAGAAGGT		yam_W_contig_1022_a	Wc_1022_aL	AGA	3	12	(AGA)	4	(AGA)4			Wc_1022_aL	(AGA)4			Wc_1022_aL	AGA				Wc_1022_a	Wc_1022_aL	218
Wc_1105_aL	CAGTTTTCCCAGTCACGACATGTCGAAGCAAGCAAGATGC	Wc_1105_aR	GTTTGTTTTGAAGGTGAGGCTTTTGATG	(CCT)4	(CCT)4	CCT	170	170	170-170	Monomorphic													Wc_2697_bL	CAGTTTTCCCAGTCACGACCAAGGGATTGAGAGGAAGATGAAG		yam_W_contig_1105_a	Wc_1105_aL	CCT	3	12	(CCT)	4	(CCT)4			Wc_1105_aL	(CCT)4			Wc_1105_aL	CCT				Wc_1105_a	Wc_1105_aL	170
Wc_114_aL	CAGTTTTCCCAGTCACGACAGGAGAAATCGCCTGAACTTGAC	Wc_114_aR	GTTTTTTATCCTTTAGCATGCCCAGAAA	(CTT)4	(CTT)4	CTT	182	182	182-182	Monomorphic													Wc_278_aL	CAGTTTTCCCAGTCACGACGATCCAGAGGCAACAGCATCTACT		yam_W_contig_114_a	Wc_114_aL	CTT	3	12	(CTT)	4	(CTT)4			Wc_114_aL	(CTT)4			Wc_114_aL	CTT				Wc_114_a	Wc_114_aL	182
Wc_1198_aL	CAGTTTTCCCAGTCACGACTTTCTGGAGATGGGAATAGTGGAA	Wc_1198_aR	GTTTTTAGGATCCACTCCAAAGTCGAAG	(TGC)4	(TGC)4	TGC	118	118	118-118	Monomorphic													Wc_2837_aL	CAGTTTTCCCAGTCACGACATGTGGAAAAACACACATTGTTGG		yam_W_contig_1198_a	Wc_1198_aL	TGC	3	12	(TGC)	4	(TGC)4			Wc_1198_aL	(TGC)4			Wc_1198_aL	TGC				Wc_1198_a	Wc_1198_aL	118
Wc_1235_aL	CAGTTTTCCCAGTCACGACATATTCACCTCCTTCTTTGGCTCC	Wc_1235_aR	GTTTGGTTAGCTGACTTTGATTGGAGGA	(TCA)4	(TCA)4	TCA	169	169	169-169	Monomorphic													Wc_300_aL	CAGTTTTCCCAGTCACGACAAGATGATCGAAATCCATACCGAA		yam_W_contig_1235_a	Wc_1235_aL	TCA	3	12	(TCA)	4	(TCA)4			Wc_1235_aL	(TCA)4			Wc_1235_aL	TCA				Wc_1235_a	Wc_1235_aL	169
Wc_134_aL	CAGTTTTCCCAGTCACGACGCTGCTGAAGACAAGAACAAGGAT	Wc_134_aR	GTTTGTTCCTCTTTAGCTCCACGACCTT	(CCG)4	(CCG)4	CCG	108	108	108-108	Monomorphic													Wc_3078_aL	CAGTTTTCCCAGTCACGACAGCTGACGTATGATGAGAGGAAGG		yam_W_contig_134_a	Wc_134_aL	CCG	3	12	(CCG)	4	(CCG)4			Wc_134_aL	(CCG)4			Wc_134_aL	CCG				Wc_134_a	Wc_134_aL	108
Wc_1401_bL	CAGTTTTCCCAGTCACGACGTCTCCTCGATGTTCGTCTCTGAC	Wc_1401_bR	GTTTTGAGAAGAGGTTTCTTGGGATCAG	(CCG)4	(CCG)4	CCG	167	167	167-167	Monomorphic													Wc_349_aL	CAGTTTTCCCAGTCACGACGATTTCAACTCCATTGCTTTCCTG		yam_W_contig_1401_b	Wc_1401_bL	CCG	3	12	(CCG)	4	(CCG)4			Wc_1401_bL	(CCG)4			Wc_1401_bL	CCG				Wc_1401_b	Wc_1401_bL	167
Wc_1404_aL	CAGTTTTCCCAGTCACGACAGCTTCAATTTCAAAGCTCGACAG	Wc_1404_aR	GTTTGTCAGTGATGTTTTCGATCTCCCT	(GAT)4	(GAT)4	GAT	163	163	163-163	Monomorphic													Wc_36_aL	CAGTTTTCCCAGTCACGACGCATACCAGCACATGTATGCTCAG		yam_W_contig_1404_a	Wc_1404_aL	GAT	3	12	(GAT)	4	(GAT)4			Wc_1404_aL	(GAT)4			Wc_1404_aL	GAT				Wc_1404_a	Wc_1404_aL	163
Wc_1416_aL	CAGTTTTCCCAGTCACGACGAGAAAGGGTATCTCTGAGGAGGC	Wc_1416_aR	GTTTTCCTTGATCACGTCAAGGGAAG	(CCG)4	(CCG)4	CCG	64	64	64-64	Monomorphic													Wc_3784_aL	CAGTTTTCCCAGTCACGACATCACTAATGTGGCTCTTGCCATT		yam_W_contig_1416_a	Wc_1416_aL	CCG	3	12	(CCG)	4	(CCG)4			Wc_1416_aL	(CCG)4			Wc_1416_aL	CCG				Wc_1416_a	Wc_1416_aL	64
Wc_1429_aL	CAGTTTTCCCAGTCACGACGCTTGGTGCTTATTTTCTCACCAC	Wc_1429_aR	GTTTACAAGCAGGTTGGTAACAGGATCA	(TTC)4	(TTC)4	TTC	182	182	182-182	Monomorphic													Wc_4034_aL	CAGTTTTCCCAGTCACGACGAGTGGAGGAGTTGGAAGTGAGTC		yam_W_contig_1429_a	Wc_1429_aL	TTC	3	12	(TTC)	4	(TTC)4			Wc_1429_aL	(TTC)4			Wc_1429_aL	TTC				Wc_1429_a	Wc_1429_aL	182
Wc_1459_aL	CAGTTTTCCCAGTCACGACAATTGGCTCTCCAGGAAGGTTTAC	Wc_1459_aR	GTTTACCACAATGAGTTTTCCTGCATTT	(AGC)4	(AGC)4	AGC	0	0	-	Didn't Work													Wc_4114_aL	CAGTTTTCCCAGTCACGACCAAAACGAAAAGATGGAGATGGTC		yam_W_contig_1459_a	Wc_1459_aL	AGC	3	12	(AGC)	4	(AGC)4			Wc_1459_aL	(AGC)4			Wc_1459_aL	AGC				Wc_1459_a	Wc_1459_aL
Wc_1531_aL	CAGTTTTCCCAGTCACGACGTTTCTCAGATGTGGATGGAGCTT	Wc_1531_aR	GTTTGACCTTGAGATGAAGGAGGAGGAT	(CCT)4	(CCT)4	CCT	237	250	237-250	Polymorphic													Wc_4973_aL	CAGTTTTCCCAGTCACGACGATTTTAAGAAGAGGCATGGTTCG		yam_W_contig_1531_a	Wc_1531_aL	CCT	3	12	(CCT)	4	(CCT)4			Wc_1531_aL	(CCT)4			Wc_1531_aL	CCT				Wc_1531_a	Wc_1531_aL	237
Wc_1535_aL	CAGTTTTCCCAGTCACGACATCAGTGGTGTTGGATCAAGTTCA	Wc_1535_aR	GTTTTGCATGAGTCGAAATTCATAGGTG	(TGA)4	(TGA)4	TGA	182	182	182-182	Monomorphic													Wc_5349_aL	CAGTTTTCCCAGTCACGACTGGGTGTGGTTAATGAGTCTTGTG		yam_W_contig_1535_a	Wc_1535_aL	TGA	3	12	(TGA)	4	(TGA)4			Wc_1535_aL	(TGA)4			Wc_1535_aL	TGA				Wc_1535_a	Wc_1535_aL	182
Wc_1562_aL	CAGTTTTCCCAGTCACGACTGACCAGAACCCACTCAGTGTTTA	Wc_1562_aR	GTTTGTCACCTCAGCAATGCACATCTT	(GAG)4	(GAG)4	GAG	104	104	104-104	Monomorphic													Wc_5515_aL	CAGTTTTCCCAGTCACGACCTGGATTCTCCGACATTTAGATCG		yam_W_contig_1562_a	Wc_1562_aL	GAG	3	12	(GAG)	4	(GAG)4			Wc_1562_aL	(GAG)4			Wc_1562_aL	GAG				Wc_1562_a	Wc_1562_aL	104
Wc_1577_aL	CAGTTTTCCCAGTCACGACGGATGAGGCTTTCTTCTCATCAAA	Wc_1577_aR	GTTTATCCAATCTGGCACTAACAGGAGT	(GCT)4	(GCT)4	GCT	248	248	248-248	Monomorphic													Wc_5539_aL	CAGTTTTCCCAGTCACGACTTTATCAGAGCTTTTCTGCTACCGA		yam_W_contig_1577_a	Wc_1577_aL	GCT	3	12	(GCT)	4	(GCT)4			Wc_1577_aL	(GCT)4			Wc_1577_aL	GCT				Wc_1577_a	Wc_1577_aL	248
Wc_1582_aL	CAGTTTTCCCAGTCACGACACTAGTCCACATAGGCGACCAGAG	Wc_1582_aR	GTTTGGATGGTCAGTACCGTCACTCTTC	(GAA)4	(GAA)4	GAA	122	122	122-122	Monomorphic													Wc_5986_aL	CAGTTTTCCCAGTCACGACACCTACATGCCAACACAGTCTTCA		yam_W_contig_1582_a	Wc_1582_aL	GAA	3	12	(GAA)	4	(GAA)4			Wc_1582_aL	(GAA)4			Wc_1582_aL	GAA				Wc_1582_a	Wc_1582_aL	122
Wc_1596_aL	CAGTTTTCCCAGTCACGACAGCAATTCTTCAAGCTGCACAAG	Wc_1596_aR	GTTTCCAACCATCTCCTTCACATTCACT	(CAA)4	(CAA)4	CAA	172	172	172-172	Monomorphic													Wc_616_aL	CAGTTTTCCCAGTCACGACGAGCCGTACAAGAGTGCGAAAT		yam_W_contig_1596_a	Wc_1596_aL	CAA	3	12	(CAA)	4	(CAA)4			Wc_1596_aL	(CAA)4			Wc_1596_aL	CAA				Wc_1596_a	Wc_1596_aL	172
Wc_1622_aL	CAGTTTTCCCAGTCACGACCATAACGCAAACACCAAAGGAAAC	Wc_1622_aR	GTTTTTATCACCTGTTGAGGGACACAGA	(CTC)4	(CTC)4	CTC	67	67	67-67	Monomorphic													Wc_6416_aL	CAGTTTTCCCAGTCACGACCCATCAGTGGACTTTCTCAGTCCT		yam_W_contig_1622_a	Wc_1622_aL	CTC	3	12	(CTC)	4	(CTC)4			Wc_1622_aL	(CTC)4			Wc_1622_aL	CTC				Wc_1622_a	Wc_1622_aL	67
Wc_1648_aL	CAGTTTTCCCAGTCACGACGGATGGAAAACGATGGTGATCT	Wc_1648_aR	GTTTCTCATCGTTGATGATTTGATACGC	(CGA)4	(CGA)4	CGA	287	287	287-287	Monomorphic													Wc_6678_aL	CAGTTTTCCCAGTCACGACACAGAGAACAACATGGGTTTCACA		yam_W_contig_1648_a	Wc_1648_aL	CGA	3	12	(CGA)	4	(CGA)4			Wc_1648_aL	(CGA)4			Wc_1648_aL	CGA				Wc_1648_a	Wc_1648_aL	287
Wc_1678_aL	CAGTTTTCCCAGTCACGACACGAGCACAAGTAAAAGAACTCCG	Wc_1678_aR	GTTTTGGTACTGTCTGCTATGTTGCTCC	(ACC)4	(ACC)4	ACC	117	117	117-117	Monomorphic													Wc_7052_aL	CAGTTTTCCCAGTCACGACGAAACACAACCATGATGTACCAGC		yam_W_contig_1678_a	Wc_1678_aL	ACC	3	12	(ACC)	4	(ACC)4			Wc_1678_aL	(ACC)4			Wc_1678_aL	ACC				Wc_1678_a	Wc_1678_aL	117
Wc_1683_aL	CAGTTTTCCCAGTCACGACTAGAGGTTGGAAGTTCATGGATGG	Wc_1683_aR	GTTTTCACCCTCTGAACATGATTAGCAA	(TTC)4	(TTC)4	TTC	172	172	172-172	Monomorphic													Wc_7189_aL	CAGTTTTCCCAGTCACGACTTCTCCTTGATGTCTCATGACCTG		yam_W_contig_1683_a	Wc_1683_aL	TTC	3	12	(TTC)	4	(TTC)4			Wc_1683_aL	(TTC)4			Wc_1683_aL	TTC				Wc_1683_a	Wc_1683_aL	172
Wc_1721_aL	CAGTTTTCCCAGTCACGACGACGAGCTTCAGGACTCTTTCAAC	Wc_1721_aR	GTTTCTCGGAGGAGAAGAAAGAGGAGTC	(GCC)4	(GCC)4	GCC	97	101	97-101	Polymorphic													Wc_7424_aL	CAGTTTTCCCAGTCACGACAAGGATGAAGAAGCCAAACCCTAC		yam_W_contig_1721_a	Wc_1721_aL	GCC	3	12	(GCC)	4	(GCC)4			Wc_1721_aL	(GCC)4			Wc_1721_aL	GCC				Wc_1721_a	Wc_1721_aL	97
Wc_1746_aL	CAGTTTTCCCAGTCACGACCTGTCAACAGTTTATCAGGGCCTC	Wc_1746_aR	GTTTCCCGGTTGTTGTTCATCATATCTT	(CAG)4	(CAG)4	CAG	179	194	179-194	Polymorphic													Wc_3717_aR	GTTTGCAAGGATACTGGCTCTTGATGAT		yam_W_contig_1746_a	Wc_1746_aL	CAG	3	12	(CAG)	4	(CAG)4			Wc_1746_aL	(CAG)4			Wc_1746_aL	CAG				Wc_1746_a	Wc_1746_aL	179
Wc_1748_aL	CAGTTTTCCCAGTCACGACTTGTTGCTTTGGTAAAGATCCCAT	Wc_1748_aR	GTTTGATTTTCCGACTGAAGGAAAGACA	(AGA)4	(AGA)4	AGA	70	111	70-111	Polymorphic													Wc_404_aR	GTTTAAGAGGAGCAAGAATCACCATGAC		yam_W_contig_1748_a	Wc_1748_aL	AGA	3	12	(AGA)	4	(AGA)4			Wc_1748_aL	(AGA)4			Wc_1748_aL	AGA				Wc_1748_a	Wc_1748_aL	70
Wc_1789_aL	CAGTTTTCCCAGTCACGACGTCCAAGGGATGAATGAAGTTTTG	Wc_1789_aR	GTTTGACAGAAATTGTCCCTGAATCCAC	(TGC)4	(TGC)4	TGC	540	540	540-540	Monomorphic													Wc_5962_aR	GTTTCCGTTGCTGTAGTTCTTCTTAGGC		yam_W_contig_1789_a	Wc_1789_aL	TGC	3	12	(TGC)	4	(TGC)4			Wc_1789_aL	(TGC)4			Wc_1789_aL	TGC				Wc_1789_a	Wc_1789_aL	540
Wc_1831_bL	CAGTTTTCCCAGTCACGACAGCAGCAACAGCATCTACAACAAC	Wc_1831_bR	GTTTGTAGGCCTCCAATGTCTCTCCTTT	(AG)6	(AG)6	AG	540	587	540-587	Polymorphic													Wc_6200_aR	GTTTCATCAAAGCATGGTTCCATTAACA		yam_W_contig_1831_b	Wc_1831_bL	AG	2	12	(AG)	6	(AG)6			Wc_1831_bL	(AG)6			Wc_1831_bL	AG				Wc_1831_b	Wc_1831_bL	540
Wc_1915_aL	CAGTTTTCCCAGTCACGACTCAGCACAAGTGAGTATTTCAGCC	Wc_1915_aR	GTTTTCTCGACATCAAAGATGGAGACTG	(GGC)4	(GGC)4	GGC	106	106	106-106	Monomorphic													Wc_6827_aR	GTTTTGAACACAGCTGCACATAAACGTA		yam_W_contig_1915_a	Wc_1915_aL	GGC	3	12	(GGC)	4	(GGC)4			Wc_1915_aL	(GGC)4			Wc_1915_aL	GGC				Wc_1915_a	Wc_1915_aL	106
Wc_1948_aL	CAGTTTTCCCAGTCACGACCTGTGGTGAAGAACAGCTTCAAAA	Wc_1948_aR	GTTTTGGATTCAGTGGAGGTCTTGATTT	(AAG)4	(AAG)4	AAG	142	142	142-142	Monomorphic													Wc_75_aR	GTTTAGATCTTGTAGGTCTCGCTTCCCT		yam_W_contig_1948_a	Wc_1948_aL	AAG	3	12	(AAG)	4	(AAG)4			Wc_1948_aL	(AAG)4			Wc_1948_aL	AAG				Wc_1948_a	Wc_1948_aL	142
Wc_1981_aL	CAGTTTTCCCAGTCACGACACCCGTACACTTATGACAGGCAAT	Wc_1981_aR	GTTTTGAGTAGGGGAGATGGTGTAGGAC	(CCA)4	(CCA)4	CCA	116	119	116-119	Polymorphic													Wc_983_aR	GTTTTCTCAGTACTGGTCAAGATGGGTG		yam_W_contig_1981_a	Wc_1981_aL	CCA	3	12	(CCA)	4	(CCA)4			Wc_1981_aL	(CCA)4			Wc_1981_aL	CCA				Wc_1981_a	Wc_1981_aL	116
Wc_1982_aL	CAGTTTTCCCAGTCACGACTCCAGGGGAAAGTGCATATTGTAT	Wc_1982_aR	GTTTTCTCAGCTCCATTCACAAGTTCAC	(ATG)4	(ATG)4	ATG	177	177	177-177	Monomorphic													Ws87_c5895_aR	GTTTTCTACCACCACTGTCTTTGTGGAA		yam_W_contig_1982_a	Wc_1982_aL	ATG	3	12	(ATG)	4	(ATG)4			Wc_1982_aL	(ATG)4			Wc_1982_aL	ATG				Wc_1982_a	Wc_1982_aL	177
Wc_2033_aL	CAGTTTTCCCAGTCACGACAATGTTGTCCAGCTCTACGAGGTC	Wc_2033_aR	GTTTCCACAGCATTGATAAGTTGCTGAA	(AAG)4	(AAG)4	AAG	180	180	180-180	Monomorphic													Ws87_lrc4798_aR	GTTTAGACTGCTACCAGAGCAGCG		yam_W_contig_2033_a	Wc_2033_aL	AAG	3	12	(AAG)	4	(AAG)4			Wc_2033_aL	(AAG)4			Wc_2033_aL	AAG				Wc_2033_a	Wc_2033_aL	180
Wc_2142_aL	CAGTTTTCCCAGTCACGACTTTGCAGTTTAACCCTAACCCTCA	Wc_2142_aR	GTTTTGCATGCCATTCATAAGACCAG	(CAG)4	(CAG)4	CAG	156	156	156-156	Monomorphic													Ws87_lrc5684_aR	GTTTATATGTGGGTTCTCCACTTCCCTT		yam_W_contig_2142_a	Wc_2142_aL	CAG	3	12	(CAG)	4	(CAG)4			Wc_2142_aL	(CAG)4			Wc_2142_aL	CAG				Wc_2142_a	Wc_2142_aL	156
Wc_2228_aL	CAGTTTTCCCAGTCACGACTTCTGCTCCGATATCTTCAACCTC	Wc_2228_aR	GTTTCACAATAGCATGGGAAAGACCATT	(CTC)4	(CTC)4	CTC	137	137	137-137	Monomorphic													Ws87_lrc7506_aR	GTTTCAAAGCATTTCCAGTCAACCTCTT		yam_W_contig_2228_a	Wc_2228_aL	CTC	3	12	(CTC)	4	(CTC)4			Wc_2228_aL	(CTC)4			Wc_2228_aL	CTC				Wc_2228_a	Wc_2228_aL	137
Wc_2318_aL	CAGTTTTCCCAGTCACGACGGTGAGGATCGTCGGAGATG	Wc_2318_aR	GTTTGAACAAGTCCACCATCAGAGAGGT	(GAG)4	(GAG)4	GAG	170	170	170-170	Monomorphic													WsA8_c8808_3_aR	GTTTTTGTTTTGTTTGAATAATGGATGATGA		yam_W_contig_2318_a	Wc_2318_aL	GAG	3	12	(GAG)	4	(GAG)4			Wc_2318_aL	(GAG)4			Wc_2318_aL	GAG				Wc_2318_a	Wc_2318_aL	170
Wc_2404_aL	CAGTTTTCCCAGTCACGACACTCCATTGTTGGAGTCTCATGGT	Wc_2404_aR	GTTTATGGGAACTGCAAAGTAGAACTGC	(AAG)4	(AAG)4	AAG	129	129	129-129	Monomorphic													WsB9_c13520_2_aR	GTTTCTAAGCACTTCCAGCAACCTCTTC		yam_W_contig_2404_a	Wc_2404_aL	AAG	3	12	(AAG)	4	(AAG)4			Wc_2404_aL	(AAG)4			Wc_2404_aL	AAG				Wc_2404_a	Wc_2404_aL	129
Wc_2432_aL	CAGTTTTCCCAGTCACGACATCCTCGAAGGTTCTTCTCTCCAG	Wc_2432_aR	GTTTCCATTCTCCAACACCCTTCTTCT	(GGT)4	(GGT)4	GGT	159	159	159-159	Monomorphic													Wc_2185cR	GTTTAAGTAACAAGGTGGAGGAAGTCCC		yam_W_contig_2432_a	Wc_2432_aL	GGT	3	12	(GGT)	4	(GGT)4			Wc_2432_aL	(GGT)4			Wc_2432_aL	GGT				Wc_2432_a	Wc_2432_aL	159
Wc_2443_bL	CAGTTTTCCCAGTCACGACGAAAGTCATCTGGATTGCAAGGAT	Wc_2443_bR	GTTTATAAAAGTGCAACAGCTCCTCCC	(AAG)4	(AAG)4	AAG	259	269	259-269	Polymorphic													Wc_369_aR	GTTTCTGCTGCTGATCTTTCTCATGTTC		yam_W_contig_2443_b	Wc_2443_bL	AAG	3	12	(AAG)	4	(AAG)4			Wc_2443_bL	(AAG)4			Wc_2443_bL	AAG				Wc_2443_b	Wc_2443_bL	259
Wc_2465_aL	CAGTTTTCCCAGTCACGACCGTTGTGTACCTGGTTGGTGG	Wc_2465_aR	GTTTAACTCATCACAGGGTTCCAATGAG	(GTC)4	(GTC)4	GTC	241	241	241-241	Monomorphic													Wc_5258cR	GTTTATTATCTTCGTCTCCACCTCCTCC		yam_W_contig_2465_a	Wc_2465_aL	GTC	3	12	(GTC)	4	(GTC)4			Wc_2465_aL	(GTC)4			Wc_2465_aL	GTC				Wc_2465_a	Wc_2465_aL	241
Wc_2495_aL	CAGTTTTCCCAGTCACGACGTCTTTTCCCTTTGGATGACATTG	Wc_2495_aR	GTTTGGCATAGGACACCACTTGTTTGAT	(AAG)4	(AAG)4	AAG	146	146	146-146	Monomorphic													Wc_5523_bR	GTTTAGTAAACCCGTTTCTTCACCGAGT		yam_W_contig_2495_a	Wc_2495_aL	AAG	3	12	(AAG)	4	(AAG)4			Wc_2495_aL	(AAG)4			Wc_2495_aL	AAG				Wc_2495_a	Wc_2495_aL	146
Wc_2498_aL	CAGTTTTCCCAGTCACGACGGCAACTGAATTGTGTTTCTTCG	Wc_2498_aR	GTTTAGCAGATAGATCAAGTTCAAACACAAAC	(TTA)4	(TTA)4	TTA	158	158	158-158	Monomorphic													Wc_6261_aR	GTTTCGTTTACATTGCGTGATAAGCATC		yam_W_contig_2498_a	Wc_2498_aL	TTA	3	12	(TTA)	4	(TTA)4			Wc_2498_aL	(TTA)4			Wc_2498_aL	TTA				Wc_2498_a	Wc_2498_aL	158
Wc_2574_aL	CAGTTTTCCCAGTCACGACTGTGAAGCTTAAGTTATCGCCCAT	Wc_2574_aR	GTTTTGCAATCCTCATATGAACTTCCCT	(TGT)4	(TGT)4	TGT	174	174	174-174	Monomorphic													Wc_1747_aR	GTTTTTCCACTCTCTCCTGAAGAACACC		yam_W_contig_2574_a	Wc_2574_aL	TGT	3	12	(TGT)	4	(TGT)4			Wc_2574_aL	(TGT)4			Wc_2574_aL	TGT				Wc_2574_a	Wc_2574_aL	174
Wc_2639_bL	CAGTTTTCCCAGTCACGACTGCAGTCAGTGAGGAGTGTGAAAT	Wc_2639_bR	GTTTCCCAGCCTTAACAAAAAGAGGTTT	(AAG)4	(AAG)4	AAG	141	141	141-141	Monomorphic													Wc_1036_aR	GTTTTTACCTAGCTTCAAAACGTCCTGC		yam_W_contig_2639_b	Wc_2639_bL	AAG	3	12	(AAG)	4	(AAG)4			Wc_2639_bL	(AAG)4			Wc_2639_bL	AAG				Wc_2639_b	Wc_2639_bL	141
Wc_2657_aL	CAGTTTTCCCAGTCACGACATACCTATAAGAGGCCGAGGCAGT	Wc_2657_aR	GTTTTCACCATCAATGTCAACAACAGTG	(CTG)4	(CTG)4	CTG	151	151	151-151	Monomorphic													Wc_1972_aR	GTTTGTTCAAATGGCTGCTATGGCTC		yam_W_contig_2657_a	Wc_2657_aL	CTG	3	12	(CTG)	4	(CTG)4			Wc_2657_aL	(CTG)4			Wc_2657_aL	CTG				Wc_2657_a	Wc_2657_aL	151
Wc_2732_aL	CAGTTTTCCCAGTCACGACGAGGTCCTGATATCGCTCTACACG	Wc_2732_aR	GTTTATCCGCTTCTCAATCACCTCC	(AGG)4	(AGG)4	AGG	174	174	174-174	Monomorphic													Wc_215_aR	GTTTAACCAGTGGGTTTCGTTCAGC		yam_W_contig_2732_a	Wc_2732_aL	AGG	3	12	(AGG)	4	(AGG)4			Wc_2732_aL	(AGG)4			Wc_2732_aL	AGG				Wc_2732_a	Wc_2732_aL	174
Wc_2749_aL	CAGTTTTCCCAGTCACGACCTCTCTTTCTGCCAGCACTCTCA	Wc_2749_aR	GTTTAGTACTCAGCGTCAGTGGACTTCA	(GCG)4	(GCG)4	GCG	166	171	166-171	Polymorphic													Wc_2251_aR	GTTTTCCTCATCTTCATCCTGGCATATT		yam_W_contig_2749_a	Wc_2749_aL	GCG	3	12	(GCG)	4	(GCG)4			Wc_2749_aL	(GCG)4			Wc_2749_aL	GCG				Wc_2749_a	Wc_2749_aL	166
Wc_3037_aL	CAGTTTTCCCAGTCACGACCCGAGGAGGAGTTTAACATTGAGA	Wc_3037_aR	GTTTCGAATTTCAACCTGCTTTTCTTTG	(AGA)4	(AGA)4	AGA	119	119	119-119	Monomorphic													Wc_2471_bR	GTTTCCACAACATCAGTAACAACAGGCT		yam_W_contig_3037_a	Wc_3037_aL	AGA	3	12	(AGA)	4	(AGA)4			Wc_3037_aL	(AGA)4			Wc_3037_aL	AGA				Wc_3037_a	Wc_3037_aL	119
Wc_3057_aL	CAGTTTTCCCAGTCACGACCATTGTCTCTCATATGGGGACCTC	Wc_3057_aR	GTTTGGAGATCCATTAATTGTCGAACCA	(AAG)4	(AAG)4	AAG	181	181	181-181	Monomorphic													Wc_2511_aR	GTTTAGTCCCAATTGCTTTCTCCAAAAT		yam_W_contig_3057_a	Wc_3057_aL	AAG	3	12	(AAG)	4	(AAG)4			Wc_3057_aL	(AAG)4			Wc_3057_aL	AAG				Wc_3057_a	Wc_3057_aL	181
Wc_3062_aL	CAGTTTTCCCAGTCACGACCTGTTGAAGAAGGATGGCAAAAAG	Wc_3062_aR	GTTTTATTCACAAACTCAGCGCTTGAAC	(AGA)4	(AGA)4	AGA	174	174	174-174	Monomorphic													Wc_2602_bR	GTTTGTGGTGGTGGGTCAGGTTTTT		yam_W_contig_3062_a	Wc_3062_aL	AGA	3	12	(AGA)	4	(AGA)4			Wc_3062_aL	(AGA)4			Wc_3062_aL	AGA				Wc_3062_a	Wc_3062_aL	174
Wc_3092_aL	CAGTTTTCCCAGTCACGACTATGCTCTTTAGCTGGACTCGGAT	Wc_3092_aR	GTTTAGGATATCACGGCTAACCACCTC	(TCT)4	(TCT)4	TCT	164	164	164-164	Monomorphic													Wc_2691_aR	GTTTATTTATCACCCATGATGATTGCCT		yam_W_contig_3092_a	Wc_3092_aL	TCT	3	12	(TCT)	4	(TCT)4			Wc_3092_aL	(TCT)4			Wc_3092_aL	TCT				Wc_3092_a	Wc_3092_aL	164
Wc_3126_aL	CAGTTTTCCCAGTCACGACGAGTGGAACTCCTTGGGTTGTAGA	Wc_3126_aR	GTTTAAAATAACAACTTTTTCTGCCGGG	(CCG)4	(CCG)4	CCG	174	174	174-174	Monomorphic													Wc_2697_bR	GTTTCCAACTTCAACATGAAATCCAAGA		yam_W_contig_3126_a	Wc_3126_aL	CCG	3	12	(CCG)	4	(CCG)4			Wc_3126_aL	(CCG)4			Wc_3126_aL	CCG				Wc_3126_a	Wc_3126_aL	174
Wc_32_aL	CAGTTTTCCCAGTCACGACGTCGTCATCGCTCTCTTCTTTCTC	Wc_32_aR	GTTTCCGTTTTCCAGGTTATTATTGGC	(CCA)4	(CCA)4	CCA	178	178	178-178	Monomorphic													Wc_278_aR	GTTTTGAAAACCCTTGAACTTGATGAGC		yam_W_contig_32_a	Wc_32_aL	CCA	3	12	(CCA)	4	(CCA)4			Wc_32_aL	(CCA)4			Wc_32_aL	CCA				Wc_32_a	Wc_32_aL	178
Wc_3230_aL	CAGTTTTCCCAGTCACGACATAAATCTGGATGGCAGCTTGAGA	Wc_3230_aR	GTTTATAACAAGCAAAAGGCAGCTCATC	(TGA)4	(TGA)4	TGA	174	176	174-176	Polymorphic													Wc_2837_aR	GTTTTATTTGTTCAGAAGCTCAGGTCCC		yam_W_contig_3230_a	Wc_3230_aL	TGA	3	12	(TGA)	4	(TGA)4			Wc_3230_aL	(TGA)4			Wc_3230_aL	TGA				Wc_3230_a	Wc_3230_aL	174
Wc_3253_bL	CAGTTTTCCCAGTCACGACTCCTTCCCAGCAATCTATACATCC	Wc_3253_bR	GTTTATTTCTTTGCAGGTTTAGCCCATT	(CAA)4	(CAA)4	CAA	167	170	167-170	Polymorphic													Wc_300_aR	GTTTAGCCTGATCTCACCATCGAGAC		yam_W_contig_3253_b	Wc_3253_bL	CAA	3	12	(CAA)	4	(CAA)4			Wc_3253_bL	(CAA)4			Wc_3253_bL	CAA				Wc_3253_b	Wc_3253_bL	167
Wc_3263_aL	CAGTTTTCCCAGTCACGACCCGCAGCTTGTGAAATAAGAGAAG	Wc_3263_aR	GTTTCAAGCTGGCAATTATGGAGAGAAG	(GAA)4	(GAA)4	GAA	113	113	113-113	Monomorphic													Wc_3078_aR	GTTTACGAAACTGGCAAGCTTAGTCATC		yam_W_contig_3263_a	Wc_3263_aL	GAA	3	12	(GAA)	4	(GAA)4			Wc_3263_aL	(GAA)4			Wc_3263_aL	GAA				Wc_3263_a	Wc_3263_aL	113
Wc_3295_aL	CAGTTTTCCCAGTCACGACTGGTAGCTGATTACTGGACAACGA	Wc_3295_aR	GTTTCTGGGTCAACCAACATTTCTAACC	(ATG)4	(ATG)4	ATG	440	440	440-440	Monomorphic													Wc_349_aR	GTTTTAAACTTCAGTCAGACCACCACCA		yam_W_contig_3295_a	Wc_3295_aL	ATG	3	12	(ATG)	4	(ATG)4			Wc_3295_aL	(ATG)4			Wc_3295_aL	ATG				Wc_3295_a	Wc_3295_aL	440
Wc_3308_aL	CAGTTTTCCCAGTCACGACCCACTTTCATACTTCCCAGAATGG	Wc_3308_aR	GTTTTCCTACAAAGGAAGGGAATGATGA	(TCC)4	(TCC)4	TCC	165	165	165-165	Monomorphic													Wc_36_aR	GTTTCAGCCTTCATGATCTTCTTGATCC		yam_W_contig_3308_a	Wc_3308_aL	TCC	3	12	(TCC)	4	(TCC)4			Wc_3308_aL	(TCC)4			Wc_3308_aL	TCC				Wc_3308_a	Wc_3308_aL	165
Wc_3386_aL	CAGTTTTCCCAGTCACGACAAGCTTCAGCTTTCACAAACTGCT	Wc_3386_aR	GTTTCCCTTGACTACTGAGGCATCATCT	(TGA)4	(TGA)4	TGA	0	0	-	Didn't Work													Wc_3784_aR	GTTTCATCAAGAGGAAACTAGCTGCACA		yam_W_contig_3386_a	Wc_3386_aL	TGA	3	12	(TGA)	4	(TGA)4			Wc_3386_aL	(TGA)4			Wc_3386_aL	TGA				Wc_3386_a	Wc_3386_aL
Wc_3434_aL	CAGTTTTCCCAGTCACGACGCTTGCCTGAACTTTGCTGATT	Wc_3434_aR	GTTTCTCCTTCAATCCCAACCCTTTC	(GCG)4	(GCG)4	GCG	155	155	155-155	Monomorphic													Wc_4034_aR	GTTTGGATAAGAAGCAAGTCTCCCCATT		yam_W_contig_3434_a	Wc_3434_aL	GCG	3	12	(GCG)	4	(GCG)4			Wc_3434_aL	(GCG)4			Wc_3434_aL	GCG				Wc_3434_a	Wc_3434_aL	155
Wc_3492_aL	CAGTTTTCCCAGTCACGACTTGGACAAAATCAGATACCGATGA	Wc_3492_aR	GTTTCTACTGGTCATGATCCAAGGTGGT	(AAG)4	(AAG)4	AAG	181	181	181-181	Monomorphic													Wc_4114_aR	GTTTTTTCATCAAGGACTTGGTTCACAA		yam_W_contig_3492_a	Wc_3492_aL	AAG	3	12	(AAG)	4	(AAG)4			Wc_3492_aL	(AAG)4			Wc_3492_aL	AAG				Wc_3492_a	Wc_3492_aL	181
Wc_3505_aL	CAGTTTTCCCAGTCACGACTTTAGTAGCAGCTTCTTTGCCGAG	Wc_3505_aR	GTTTGTTGCTGAAAGAGAACCCAAACAT	(CCA)4	(CCA)4	CCA	132	132	132-132	Monomorphic													Wc_4973_aR	GTTTATCATTGAACTCCTGGAAATCAGC		yam_W_contig_3505_a	Wc_3505_aL	CCA	3	12	(CCA)	4	(CCA)4			Wc_3505_aL	(CCA)4			Wc_3505_aL	CCA				Wc_3505_a	Wc_3505_aL	132
Wc_3561_aL	CAGTTTTCCCAGTCACGACGAAATCCAGAGATTTTGTGTTGGG	Wc_3561_aR	GTTTGCCTGAATGATGTGCAGTATCTGT	(CAA)4	(CAA)4	CAA	150	150	150-150	Monomorphic													Wc_5349_aR	GTTTTTGTTCATGGGAACCAAATATTCC		yam_W_contig_3561_a	Wc_3561_aL	CAA	3	12	(CAA)	4	(CAA)4			Wc_3561_aL	(CAA)4			Wc_3561_aL	CAA				Wc_3561_a	Wc_3561_aL	150
Wc_3562_aL	CAGTTTTCCCAGTCACGACAGCAATACCTATGGAGTTGCAGGA	Wc_3562_aR	GTTTGAAGTCTTCCGTTTCATCTGCATT	(TGC)4	(TGC)4	TGC	0	0	-	Didn't Work													Wc_5515_aR	GTTTGAAAACTAGTCACCCGCTTGAGAA		yam_W_contig_3562_a	Wc_3562_aL	TGC	3	12	(TGC)	4	(TGC)4			Wc_3562_aL	(TGC)4			Wc_3562_aL	TGC				Wc_3562_a	Wc_3562_aL
Wc_3577_aL	CAGTTTTCCCAGTCACGACGCACAAGCACCTAATCATTCATTTC	Wc_3577_aR	GTTTGTACCTAGCACCGGATTGTGTCTC	(TGG)4	(TGG)4	TGG	80	80	80-80	Monomorphic													Wc_5539_aR	GTTTCCAATAGACCAACACCAAACATCA		yam_W_contig_3577_a	Wc_3577_aL	TGG	3	12	(TGG)	4	(TGG)4			Wc_3577_aL	(TGG)4			Wc_3577_aL	TGG				Wc_3577_a	Wc_3577_aL	80
Wc_3658_aL	CAGTTTTCCCAGTCACGACATGGAATTGGAACCAAGTTACGAG	Wc_3658_aR	GTTTTATCGCTGATGAGCGGAATAATAG	(GAA)4	(GAA)4	GAA	173	173	173-173	Monomorphic													Wc_5986_aR	GTTTCGGTCGTCTATGATAGTAGGAAGCA		yam_W_contig_3658_a	Wc_3658_aL	GAA	3	12	(GAA)	4	(GAA)4			Wc_3658_aL	(GAA)4			Wc_3658_aL	GAA				Wc_3658_a	Wc_3658_aL	173
Wc_3659_aL	CAGTTTTCCCAGTCACGACGTGCTCATTGTGCTAAAGTTCGTG	Wc_3659_aR	GTTTATGAGCTTTCAATTAGACCTGCCA	(CTG)4	(CTG)4	CTG	252	254	252-254	Polymorphic													Wc_616_aR	GTTTGAAGCTCTGGAGGTTCTTCTCCTC		yam_W_contig_3659_a	Wc_3659_aL	CTG	3	12	(CTG)	4	(CTG)4			Wc_3659_aL	(CTG)4			Wc_3659_aL	CTG				Wc_3659_a	Wc_3659_aL	252
Wc_368_aL	CAGTTTTCCCAGTCACGACGATATGAGAAAGCAGCTCAAGGGA	Wc_368_aR	GTTTCTCATTCCCCGGAAGTAGAAGC	(TCA)4	(TCA)4	TCA	183	183	183-183	Monomorphic													Wc_6416_aR	GTTTGATGTGCACAAAAGGATACGAGTG		yam_W_contig_368_a	Wc_368_aL	TCA	3	12	(TCA)	4	(TCA)4			Wc_368_aL	(TCA)4			Wc_368_aL	TCA				Wc_368_a	Wc_368_aL	183
Wc_3744_aL	CAGTTTTCCCAGTCACGACAACTCCCACAAAACACCATCAAGT	Wc_3744_aR	GTTTAATAACACTCCCATCCTCCAACTG	(AAG)4	(AAG)4	AAG	122	122	122-122	Monomorphic													Wc_6678_aR	GTTTAACACCATTCCAAGCTACATCCAT		yam_W_contig_3744_a	Wc_3744_aL	AAG	3	12	(AAG)	4	(AAG)4			Wc_3744_aL	(AAG)4			Wc_3744_aL	AAG				Wc_3744_a	Wc_3744_aL	122
Wc_3783_aL	CAGTTTTCCCAGTCACGACCATTCATCTTCTCCGAATGGTAGC	Wc_3783_aR	GTTTGAGAGCATCACCATCTCTGCTGT	(ATG)4	(ATG)4	ATG	177	177	177-177	Monomorphic													Wc_7052_aR	GTTTGCTTGGTGATGATTATTCTTTCGG		yam_W_contig_3783_a	Wc_3783_aL	ATG	3	12	(ATG)	4	(ATG)4			Wc_3783_aL	(ATG)4			Wc_3783_aL	ATG				Wc_3783_a	Wc_3783_aL	177
Wc_3797_aL	CAGTTTTCCCAGTCACGACCAAAGATTGCTGCCTTCTGGTTAT	Wc_3797_aR	GTTTTTCTTTGTATGCCCACCAAATCTT	(ATG)4	(ATG)4	ATG	121	121	121-121	Monomorphic													Wc_7189_aR	GTTTTAGCAGACATGATAGTGACCGACG		yam_W_contig_3797_a	Wc_3797_aL	ATG	3	12	(ATG)	4	(ATG)4			Wc_3797_aL	(ATG)4			Wc_3797_aL	ATG				Wc_3797_a	Wc_3797_aL	121
Wc_3855_aL	CAGTTTTCCCAGTCACGACGAGCTCATTCTCAATGGGTTCATC	Wc_3855_aR	GTTTGCTTGGTTGGAGATCAACAAGTCT	(CAT)4	(CAT)4	CAT	0	0	-	Didn't Work													Wc_7424_aR	GTTTGAGTTCCACACTTGTTGTTGATGC		yam_W_contig_3855_a	Wc_3855_aL	CAT	3	12	(CAT)	4	(CAT)4			Wc_3855_aL	(CAT)4			Wc_3855_aL	CAT				Wc_3855_a	Wc_3855_aL
Wc_3893_aL	CAGTTTTCCCAGTCACGACATCAATTCGTATCCCGTTCAGGTT	Wc_3893_aR	GTTTATACCCCTTTGATGGTGTTGTTTG	(TAG)4	(TAG)4	TAG	156	156	156-156	Monomorphic																yam_W_contig_3893_a	Wc_3893_aL	TAG	3	12	(TAG)	4	(TAG)4			Wc_3893_aL	(TAG)4			Wc_3893_aL	TAG				Wc_3893_a	Wc_3893_aL	156
Wc_3943_aL	CAGTTTTCCCAGTCACGACCCTTGTGAGAAACCCATGATCG	Wc_3943_aR	GTTTGCCCATCAGCATCAGTACTACCAT	(CTG)4	(CTG)4	CTG	132	132	132-132	Monomorphic													Wc_818_aL	CAGTTTTCCCAGTCACGACGATACCCGTTGCGTGCTGTC		yam_W_contig_3943_a	Wc_3943_aL	CTG	3	12	(CTG)	4	(CTG)4			Wc_3943_aL	(CTG)4			Wc_3943_aL	CTG				Wc_3943_a	Wc_3943_aL	132
Wc_403_aL	CAGTTTTCCCAGTCACGACACCACTAGCACTGAAAGGCTTGAG	Wc_403_aR	GTTTCGTCAATTATATCCGGATGGAGAG	(TGA)4	(TGA)4	TGA	0	0	-	Didn't Work													Wc_946_aL	CAGTTTTCCCAGTCACGACGAAGAAGGCGGAGACCTTCAA		yam_W_contig_403_a	Wc_403_aL	TGA	3	12	(TGA)	4	(TGA)4			Wc_403_aL	(TGA)4			Wc_403_aL	TGA				Wc_403_a	Wc_403_aL
Wc_4176_aL	CAGTTTTCCCAGTCACGACGAGCCAGAGATAGCTTGAGTTTGG	Wc_4176_aR	GTTTCAACACATCCCAGATGGAGTTACA	(CAT)4	(CAT)4	CAT	128	128	128-128	Monomorphic													Wc_961_aL	CAGTTTTCCCAGTCACGACCTTCGTTGAAGAGTGATGGTGTTG		yam_W_contig_4176_a	Wc_4176_aL	CAT	3	12	(CAT)	4	(CAT)4			Wc_4176_aL	(CAT)4			Wc_4176_aL	CAT				Wc_4176_a	Wc_4176_aL	128
Wc_4215_aL	CAGTTTTCCCAGTCACGACCTCGCCCATATTGTAACCTCTCAC	Wc_4215_aR	GTTTTAAAGCAAGTAGAGGAGGGTGCTG	(GGT)4	(GGT)4	GGT	170	170	170-170	Monomorphic													Ws87_c10411_aL	CAGTTTTCCCAGTCACGACATTAAAGTCGCACAACCCAAAGAG		yam_W_contig_4215_a	Wc_4215_aL	GGT	3	12	(GGT)	4	(GGT)4			Wc_4215_aL	(GGT)4			Wc_4215_aL	GGT				Wc_4215_a	Wc_4215_aL	170
Wc_423_aL	CAGTTTTCCCAGTCACGACATGGGCTCATCCGTTCCTAACTAT	Wc_423_aR	GTTTCCTCCAAGATGATGTTAAATTCCG	(ATG)4	(ATG)4	ATG	169	169	169-169	Monomorphic													Ws87_c4466_aL	CAGTTTTCCCAGTCACGACGATGCTCGGTTAACGGTAAAGTTG		yam_W_contig_423_a	Wc_423_aL	ATG	3	12	(ATG)	4	(ATG)4			Wc_423_aL	(ATG)4			Wc_423_aL	ATG				Wc_423_a	Wc_423_aL	169
Wc_4308_aL	CAGTTTTCCCAGTCACGACTATTGAGGATGCAATGTAGAGCCA	Wc_4308_aR	GTTTAGCTTTGGAACATACACCCAAATG	(CCA)4	(CCA)4	CCA	65	65	65-65	Monomorphic													Ws87_c4471_aL	CAGTTTTCCCAGTCACGACTTTATAGTGGCTCAAATGGCAATG		yam_W_contig_4308_a	Wc_4308_aL	CCA	3	12	(CCA)	4	(CCA)4			Wc_4308_aL	(CCA)4			Wc_4308_aL	CCA				Wc_4308_a	Wc_4308_aL	65
Wc_4334_aL	CAGTTTTCCCAGTCACGACGCTTGTCAAAAGCCACATGAAGTA	Wc_4334_aR	GTTTTAGTCTTCACTCCCGAACTCAACC	(GCT)4	(GCT)4	GCT	176	176	176-176	Monomorphic													Ws87_c4688_bL	CAGTTTTCCCAGTCACGACGTTCTCCTTCCTCCCATCAACTTT		yam_W_contig_4334_a	Wc_4334_aL	GCT	3	12	(GCT)	4	(GCT)4			Wc_4334_aL	(GCT)4			Wc_4334_aL	GCT				Wc_4334_a	Wc_4334_aL	176
Wc_4336_aL	CAGTTTTCCCAGTCACGACCAAAAAGAGCAAAAACACAAACCA	Wc_4336_aR	GTTTGATGCAGGGTTCTAAGGACACTCT	(CCT)4	(CCT)4	CCT	172	176	172-176	Polymorphic													Ws87_c6429_aL	CAGTTTTCCCAGTCACGACGATGGCGGAGTTGTGATGAATAA		yam_W_contig_4336_a	Wc_4336_aL	CCT	3	12	(CCT)	4	(CCT)4			Wc_4336_aL	(CCT)4			Wc_4336_aL	CCT				Wc_4336_a	Wc_4336_aL	172
Wc_4372_aL	CAGTTTTCCCAGTCACGACCAGTGAAAGCCAAGAGAAGCAAG	Wc_4372_aR	GTTTTGAGACAAGACGATGAAGAGGATG	(CGT)4	(CGT)4	CGT	171	171	171-171	Monomorphic													Ws87_c7137_aL	CAGTTTTCCCAGTCACGACCTCAATCATCACCTTCGTCCTCTT		yam_W_contig_4372_a	Wc_4372_aL	CGT	3	12	(CGT)	4	(CGT)4			Wc_4372_aL	(CGT)4			Wc_4372_aL	CGT				Wc_4372_a	Wc_4372_aL	171
NHc_4177_aL	CAGTTTTCCCAGTCACGACGTGTCCTTGTACCAGTTCGCTTAC	NHc_4177_aR	GTTTAAAAGAAGGAGCTACAAAATAAAGTTCA	(AT)20	(AT)20	AT	0	0	-	Didn't Work													Ws87_c7312_aL	CAGTTTTCCCAGTCACGACAACAAACAACTCCTCAAGATTCGC		yam_NH_contig_4177_a	NHc_4177_aL	AT	2	40	(AT)	20	(AT)20			NHc_4177_aL	(AT)20			NHc_4177_aL	AT				NHc_4177_a	NHc_4177_aL
NHsB9_c13712_2_aL	CAGTTTTCCCAGTCACGACGATGATCTTGCATGCCTTCTTGT	NHsB9_c13712_2_aR	GTTTAAACTCTCAAGAAACAACATCAACAACT	(GTT)12	(GTT)12	GTT	167	235	167-235	Polymorphic													Ws87_c7809_aL	CAGTTTTCCCAGTCACGACACTAGAATCACTGTCCGACGATCC		yam_NH_singleton_B310-33_9_c13712_2_a	NHsB9_c13712_2_aL	GTT	3	36	(GTT)	12	(GTT)12			NHsB9_c13712_2_aL	(GTT)12			NHsB9_c13712_2_aL	GTT				NHsB9_c13712_2_a	NHsB9_c13712_2_aL	167
NHc_1742_aL	CAGTTTTCCCAGTCACGACAAGTATTCCATCTCCTGAAAGGGG	NHc_1742_aR	GTTTCCGTGACTCTGACAACTGTGTACC	(AGGCAC)5	(AGGCAC)5	AGGCAC	159	177	159-177	Polymorphic													Ws87_lrc1697_aL	CAGTTTTCCCAGTCACGACTCATTAAGGTTTGGTGAAGTGGGT		yam_NH_contig_1742_a	NHc_1742_aL	AGGCAC	6	30	(AGGCAC)	5	(AGGCAC)5			NHc_1742_aL	(AGGCAC)5			NHc_1742_aL	AGGCAC				NHc_1742_a	NHc_1742_aL	159
NHc_2230_aL	CAGTTTTCCCAGTCACGACATAATTTGCATGGCGAAAAGGAA	NHc_2230_aR	GTTTTGCAGTGATCTCTTCATGGACAA	(TAA)10	(TAA)10	TAA	171	180	171-180	Polymorphic													WsA8_c10477_2_aL	CAGTTTTCCCAGTCACGACTGAGATTTTGGAAGGCCAGAATAG		yam_NH_contig_2230_a	NHc_2230_aL	TAA	3	30	(TAA)	10	(TAA)10			NHc_2230_aL	(TAA)10			NHc_2230_aL	TAA				NHc_2230_a	NHc_2230_aL	171
NHsA8_c12418_2_aL	CAGTTTTCCCAGTCACGACATAGCCATCATCCATTGAGCTTAC	NHsA8_c12418_2_aR	GTTTTGATTGGATATTTATTCTTTCGTTATGA	(AC)15	(AC)15	AC	176	176	176-176	Monomorphic													WsA8_c13246_2_aL	CAGTTTTCCCAGTCACGACCGATTAAATGATCACCTTGTGGAA		yam_NH_singleton_A328-33_8_c12418_2_a	NHsA8_c12418_2_aL	AC	2	30	(AC)	15	(AC)15			NHsA8_c12418_2_aL	(AC)15			NHsA8_c12418_2_aL	AC				NHsA8_c12418_2_a	NHsA8_c12418_2_aL	176
NHc_7064_aL	CAGTTTTCCCAGTCACGACCAAGCCATTGCATTTGGAATTT	NHc_7064_aR	GTTTGAGACCTCAAACTCAATCCACTGAA	(GAGGAAA)4	(GAGGAAA)4	GAGGAAA	174	181	174-181	Polymorphic													WsA8_c14051_2_aL	CAGTTTTCCCAGTCACGACTGAATGGGATGACGAGGATTG		yam_NH_contig_7064_a	NHc_7064_aL	GAGGAAA	7	28	(GAGGAAA)	4	(GAGGAAA)4			NHc_7064_aL	(GAGGAAA)4			NHc_7064_aL	GAGGAAA				NHc_7064_a	NHc_7064_aL	174
NHsA8_c4909_5_aL	CAGTTTTCCCAGTCACGACAGTAGCTGCTTCCCTTGGAAAAGA	NHsA8_c4909_5_aR	GTTTCACATACAAACATGCAGGATGCTC	(ATCAATA)4	(ATCAATA)4	ATCAATA	119	126	119-126	Polymorphic													WsA8_c4604_9_aL	CAGTTTTCCCAGTCACGACGTGATGATCGATTGAAAAGGGAAC		yam_NH_singleton_A328-33_8_c4909_5_a	NHsA8_c4909_5_aL	ATCAATA	7	28	(ATCAATA)	4	(ATCAATA)4			NHsA8_c4909_5_aL	(ATCAATA)4			NHsA8_c4909_5_aL	ATCAATA				NHsA8_c4909_5_a	NHsA8_c4909_5_aL	119
NHc_118_aL	CAGTTTTCCCAGTCACGACTCACCACAACCCAAACAAAATACA	NHc_118_aR	GTTTGAAAAGGTAGGTGGTTTTTGTGGA	(CATG)6	(CATG)6	CATG	155	155	155-155	Monomorphic													WsA8_c8305_3_aL	CAGTTTTCCCAGTCACGACCGTTTGCAAGGAGGAGTTCTTGT		yam_NH_contig_118_a	NHc_118_aL	CATG	4	24	(CATG)	6	(CATG)6			NHc_118_aL	(CATG)6			NHc_118_aL	CATG				NHc_118_a	NHc_118_aL	155
NHc_2841cL	CAGTTTTCCCAGTCACGACTGATATAAAGGGAACAAGGAATGGA	NHc_2841cR	GTTTTCAAGAGAAGAAAAGTGTTACAGGAATG	(CTTTCT)4	(CTTTCT)4	CTTTCT	170	170	170-170	Monomorphic													WsA8_c8655_3_aL	CAGTTTTCCCAGTCACGACATATTTATGAGATTGCAAGGCGGA		yam_NH_contig_2841_c	NHc_2841cL	CTTTCT	6	24	(CTTTCT)	4	(CTTTCT)4			NHc_2841cL	(CTTTCT)4			NHc_2841cL	CTTTCT				NHc_2841c	NHc_2841cL	170
NHc_3568_aL	CAGTTTTCCCAGTCACGACTATAGCTACGTCGAGCAGGTGATG	NHc_3568_aR	GTTTTTTCAGCCCTGACTATGACAGAGA	(GCTCCT)4	(GCTCCT)4	GCTCCT	219	219	219-219	Monomorphic													WsB9_c10540_2_aL	CAGTTTTCCCAGTCACGACTAGGAAGGTAGTTACCGACCCTGG		yam_NH_contig_3568_a	NHc_3568_aL	GCTCCT	6	24	(GCTCCT)	4	(GCTCCT)4			NHc_3568_aL	(GCTCCT)4			NHc_3568_aL	GCTCCT				NHc_3568_a	NHc_3568_aL	219
NHc_6508_aL	CAGTTTTCCCAGTCACGACAAACCACTCAAACCGATCCAAGT	NHc_6508_aR	GTTTGGAGTTGTTCCTGTTGTGCTGTT	(ACA)8	(ACA)8	ACA	0	0	-	Didn't Work													WsB9_c15149_2_aL	CAGTTTTCCCAGTCACGACCTTGACCCCTCTCACATCCTTCT		yam_NH_contig_6508_a	NHc_6508_aL	ACA	3	24	(ACA)	8	(ACA)8			NHc_6508_aL	(ACA)8			NHc_6508_aL	ACA				NHc_6508_a	NHc_6508_aL
NHc_6655_aL	CAGTTTTCCCAGTCACGACTGCATCAATAAAAATTCAAACATCATC	NHc_6655_aR	GTTTTGGTTGAAGTGGTGTCTTTGCTTA	(TAA)8	(TAA)8	TAA	169	181	169-181	Polymorphic													Wc_2285_bL	CAGTTTTCCCAGTCACGACCTGTCTCTTCACCAAACAAATCCA		yam_NH_contig_6655_a	NHc_6655_aL	TAA	3	24	(TAA)	8	(TAA)8			NHc_6655_aL	(TAA)8			NHc_6655_aL	TAA				NHc_6655_a	NHc_6655_aL	169
NHs87_c6808_aL	CAGTTTTCCCAGTCACGACCCGCTACCTCGCTCTCATACTC	NHs87_c6808_aR	GTTTCGGCGTTGAATTTGTCTATTTTGT	(CGAACC)4	(CGAACC)4	CGAACC	142	142	142-142	Monomorphic													Wc_3031_bL	CAGTTTTCCCAGTCACGACCAGCCCACTTCTTCGATGTGAT		yam_NH_singleton_87-01091-33_1_c6808_a	NHs87_c6808_aL	CGAACC	6	24	(CGAACC)	4	(CGAACC)4			NHs87_c6808_aL	(CGAACC)4			NHs87_c6808_aL	CGAACC				NHs87_c6808_a	NHs87_c6808_aL	142
NHs87_c9657_aL	CAGTTTTCCCAGTCACGACAAAGGGGTTGAATTGAAGAAGGTT	NHs87_c9657_aR	GTTTCCCTAATGCCATTTCTTATCTACTCC	(GATTCT)4	(GATTCT)4	GATTCT	0	0	-	Didn't Work													Wc_5474_aL	CAGTTTTCCCAGTCACGACAGCCAACAAGAATCAAAACCAAAA		yam_NH_singleton_87-01091-33_1_c9657_a	NHs87_c9657_aL	GATTCT	6	24	(GATTCT)	4	(GATTCT)4			NHs87_c9657_aL	(GATTCT)4			NHs87_c9657_aL	GATTCT				NHs87_c9657_a	NHs87_c9657_aL
NHs87_lrc3495_aL	CAGTTTTCCCAGTCACGACCATCTTCTCAGCCATTCCATTCTC	NHs87_lrc3495_aR	GTTTGTGTTAGGGTTTCGAAGTGGGAGT	(TCT)8	(TCT)8	TCT	163	169	163-169	Polymorphic													Wc_5905_bL	CAGTTTTCCCAGTCACGACGGTGTATGATCAGTATGGGGAGGA		yam_NH_singleton_87-01091-33_1_lrc3495_a	NHs87_lrc3495_aL	TCT	3	24	(TCT)	8	(TCT)8			NHs87_lrc3495_aL	(TCT)8			NHs87_lrc3495_aL	TCT				NHs87_lrc3495_a	NHs87_lrc3495_aL	163
NHs87_lrc4153_aL	CAGTTTTCCCAGTCACGACAAGAAACCTCATCTCCACCCTCTC	NHs87_lrc4153_aR	GTTTAGCTAGGGTATATGGGGAAGCAAT	(AACCCT)4	(AACCCT)4	AACCCT	180	188	180-188	Polymorphic													Wc_6254_bL	CAGTTTTCCCAGTCACGACACATTTTTGCGGCACTTGAGAC		yam_NH_singleton_87-01091-33_1_lrc4153_a	NHs87_lrc4153_aL	AACCCT	6	24	(AACCCT)	4	(AACCCT)4			NHs87_lrc4153_aL	(AACCCT)4			NHs87_lrc4153_aL	AACCCT				NHs87_lrc4153_a	NHs87_lrc4153_aL	180
NHs87_lrc4525_aL	CAGTTTTCCCAGTCACGACATAAAGCCTTCTATTTCGCCAGGA	NHs87_lrc4525_aR	GTTTATGGAATACCTTCGTTAGCGAGC	(CT)12	(CT)12	CT	102	104	102-104	Polymorphic													Wc_1005_bL	CAGTTTTCCCAGTCACGACTGTGAAGAGAGTGATCTCAAGGGA		yam_NH_singleton_87-01091-33_1_lrc4525_a	NHs87_lrc4525_aL	CT	2	24	(CT)	12	(CT)12			NHs87_lrc4525_aL	(CT)12			NHs87_lrc4525_aL	CT				NHs87_lrc4525_a	NHs87_lrc4525_aL	102
NHs87_lrc7566cL	CAGTTTTCCCAGTCACGACTGCTTGCTGCCATGAATAGTTTTA	NHs87_lrc7566cR	GTTTCTTCTTCTTCCTGCTGTTGTTGCT	(ATC)8	(ATC)8	ATC	140	146	140-146	Polymorphic													Wc_1013_bL	CAGTTTTCCCAGTCACGACGGTGGTGATACCAGTCACAGTCAA		yam_NH_singleton_87-01091-33_1_lrc7566_c	NHs87_lrc7566cL	ATC	3	24	(ATC)	8	(ATC)8			NHs87_lrc7566cL	(ATC)8			NHs87_lrc7566cL	ATC				NHs87_lrc7566c	NHs87_lrc7566cL	140
NHs87_lrc7899_aL	CAGTTTTCCCAGTCACGACGGATCCGGATTTGGTATGGAG	NHs87_lrc7899_aR	GTTTACGTTACCAAACCCACTAAACCC	(GGT)8	(GGT)8	GGT	153	153	153-153	Monomorphic													Wc_1022_aL	CAGTTTTCCCAGTCACGACCTCACTACCACTAAACCCACCACC		yam_NH_singleton_87-01091-33_1_lrc7899_a	NHs87_lrc7899_aL	GGT	3	24	(GGT)	8	(GGT)8			NHs87_lrc7899_aL	(GGT)8			NHs87_lrc7899_aL	GGT				NHs87_lrc7899_a	NHs87_lrc7899_aL	153
NHs87_lrc8239_aL	CAGTTTTCCCAGTCACGACCATCAGCTCTTTCCCACCACTT	NHs87_lrc8239_aR	GTTTTGATCTTGTTGTGCTTTGATTTCAT	(CTT)8	(CTT)8	CTT	122	132	122-132	Polymorphic													Wc_1105_aL	CAGTTTTCCCAGTCACGACATGTCGAAGCAAGCAAGATGC		yam_NH_singleton_87-01091-33_1_lrc8239_a	NHs87_lrc8239_aL	CTT	3	24	(CTT)	8	(CTT)8			NHs87_lrc8239_aL	(CTT)8			NHs87_lrc8239_aL	CTT				NHs87_lrc8239_a	NHs87_lrc8239_aL	122
NHsA8_c10943_3_aL	CAGTTTTCCCAGTCACGACCATTAACAGAGAAGAAGGAGAAAGAGAG	NHsA8_c10943_3_aR	GTTTATGCTTGGGTTTCTCAGATTTTCT	(ATC)8	(ATC)8	ATC	131	140	131-140	Polymorphic													Wc_114_aL	CAGTTTTCCCAGTCACGACAGGAGAAATCGCCTGAACTTGAC		yam_NH_singleton_A328-33_8_c10943_3_a	NHsA8_c10943_3_aL	ATC	3	24	(ATC)	8	(ATC)8			NHsA8_c10943_3_aL	(ATC)8			NHsA8_c10943_3_aL	ATC				NHsA8_c10943_3_a	NHsA8_c10943_3_aL	131
NHsA8_c11845_2_aL	CAGTTTTCCCAGTCACGACAAGTGGTTCGAAGGTTCGTCAAG	NHsA8_c11845_2_aR	GTTTGAGAAGAGCGGTGTGCTGATAGAG	(GCA)8	(GCA)8	GCA	156	162	156-162	Polymorphic													Wc_1198_aL	CAGTTTTCCCAGTCACGACTTTCTGGAGATGGGAATAGTGGAA		yam_NH_singleton_A328-33_8_c11845_2_a	NHsA8_c11845_2_aL	GCA	3	24	(GCA)	8	(GCA)8			NHsA8_c11845_2_aL	(GCA)8			NHsA8_c11845_2_aL	GCA				NHsA8_c11845_2_a	NHsA8_c11845_2_aL	156
NHsA8_c12478_2_aL	CAGTTTTCCCAGTCACGACTCCAATCCGTGGATTTAATACTTC	NHsA8_c12478_2_aR	GTTTAACTAATAGAAATACAGGTTTCCAGCAT	(TG)12	(TG)12	TG	159	167	159-167	Polymorphic													Wc_1235_aL	CAGTTTTCCCAGTCACGACATATTCACCTCCTTCTTTGGCTCC		yam_NH_singleton_A328-33_8_c12478_2_a	NHsA8_c12478_2_aL	TG	2	24	(TG)	12	(TG)12			NHsA8_c12478_2_aL	(TG)12			NHsA8_c12478_2_aL	TG				NHsA8_c12478_2_a	NHsA8_c12478_2_aL	159
NHsA8_c12905_2_aL	CAGTTTTCCCAGTCACGACTTATTTTCAGAAATGGGGAAGGCT	NHsA8_c12905_2_aR	GTTTGGGTCGGTTATAGCACCAAACTTA	(AG)12	(AG)12	AG	68	68	68-68	Monomorphic													Wc_134_aL	CAGTTTTCCCAGTCACGACGCTGCTGAAGACAAGAACAAGGAT		yam_NH_singleton_A328-33_8_c12905_2_a	NHsA8_c12905_2_aL	AG	2	24	(AG)	12	(AG)12			NHsA8_c12905_2_aL	(AG)12			NHsA8_c12905_2_aL	AG				NHsA8_c12905_2_a	NHsA8_c12905_2_aL	68
NHsA8_c13017_2_aL	CAGTTTTCCCAGTCACGACTCGATTTGTATAGCAACAAACTGACT	NHsA8_c13017_2_aR	GTTTCATACACTGATACACAGTTTTCCCAA	(ATA)8	(ATA)8	ATA	169	169	169-169	Monomorphic													Wc_1401_bL	CAGTTTTCCCAGTCACGACGTCTCCTCGATGTTCGTCTCTGAC		yam_NH_singleton_A328-33_8_c13017_2_a	NHsA8_c13017_2_aL	ATA	3	24	(ATA)	8	(ATA)8			NHsA8_c13017_2_aL	(ATA)8			NHsA8_c13017_2_aL	ATA				NHsA8_c13017_2_a	NHsA8_c13017_2_aL	169
NHsA8_c13304_2_aL	CAGTTTTCCCAGTCACGACTGAATTCCTAATAACGCCAAGAAGA	NHsA8_c13304_2_aR	GTTTGAGCTCCGAAATTGGTACCTCTAA	(AT)12	(AT)12	AT	191	265	191-265	Polymorphic													Wc_1404_aL	CAGTTTTCCCAGTCACGACAGCTTCAATTTCAAAGCTCGACAG		yam_NH_singleton_A328-33_8_c13304_2_a	NHsA8_c13304_2_aL	AT	2	24	(AT)	12	(AT)12			NHsA8_c13304_2_aL	(AT)12			NHsA8_c13304_2_aL	AT				NHsA8_c13304_2_a	NHsA8_c13304_2_aL	191
NHsA8_c13798_2_aL	CAGTTTTCCCAGTCACGACGTCCGTGGGTGTCTACACTAGCTT	NHsA8_c13798_2_aR	GTTTAGCCATAGATGATGCTCAGTCTCC	(AG)12	(AG)12	AG	123	129	123-129	Polymorphic													Wc_1416_aL	CAGTTTTCCCAGTCACGACGAGAAAGGGTATCTCTGAGGAGGC		yam_NH_singleton_A328-33_8_c13798_2_a	NHsA8_c13798_2_aL	AG	2	24	(AG)	12	(AG)12			NHsA8_c13798_2_aL	(AG)12			NHsA8_c13798_2_aL	AG				NHsA8_c13798_2_a	NHsA8_c13798_2_aL	123
NHsA8_c6498_3_aL	CAGTTTTCCCAGTCACGACACCTGAGTTTGGATGTTGGAAGAG	NHsA8_c6498_3_aR	GTTTACATGAGAGAACCATTAATGAGACCA	(TCT)8	(TCT)8	TCT	124	131	124-131	Polymorphic													Wc_1429_aL	CAGTTTTCCCAGTCACGACGCTTGGTGCTTATTTTCTCACCAC		yam_NH_singleton_A328-33_8_c6498_3_a	NHsA8_c6498_3_aL	TCT	3	24	(TCT)	8	(TCT)8			NHsA8_c6498_3_aL	(TCT)8			NHsA8_c6498_3_aL	TCT				NHsA8_c6498_3_a	NHsA8_c6498_3_aL	124
NHsA8_c7168_4_aL	CAGTTTTCCCAGTCACGACAACCATTCTGGTTGATTCTTGGAG	NHsA8_c7168_4_aR	GTTTACTTCAAAGAGTTGCCATGATAAACA	(TTG)8	(TTG)8	TTG	128	128	128-128	Monomorphic													Wc_1459_aL	CAGTTTTCCCAGTCACGACAATTGGCTCTCCAGGAAGGTTTAC		yam_NH_singleton_A328-33_8_c7168_4_a	NHsA8_c7168_4_aL	TTG	3	24	(TTG)	8	(TTG)8			NHsA8_c7168_4_aL	(TTG)8			NHsA8_c7168_4_aL	TTG				NHsA8_c7168_4_a	NHsA8_c7168_4_aL	128
NHsA8_c8558_3_aL	CAGTTTTCCCAGTCACGACGGTTTCTCCACAAACATCAATCCT	NHsA8_c8558_3_aR	GTTTTGCAAAGGAGTCCAAGAAAAATTC	(ATTT)6	(ATTT)6	ATTT	106	106	106-106	Monomorphic													Wc_1531_aL	CAGTTTTCCCAGTCACGACGTTTCTCAGATGTGGATGGAGCTT		yam_NH_singleton_A328-33_8_c8558_3_a	NHsA8_c8558_3_aL	ATTT	4	24	(ATTT)	6	(ATTT)6			NHsA8_c8558_3_aL	(ATTT)6			NHsA8_c8558_3_aL	ATTT				NHsA8_c8558_3_a	NHsA8_c8558_3_aL	106
NHsA8_c9177_3_aL	CAGTTTTCCCAGTCACGACTTAGTATGACGTGTGGCTGTGGAT	NHsA8_c9177_3_aR	GTTTCCGAGCATCAATCAGTTTGTTCTA	(TGTGGC)4	(TGTGGC)4	TGTGGC	120	153	120-153	Polymorphic													Wc_1535_aL	CAGTTTTCCCAGTCACGACATCAGTGGTGTTGGATCAAGTTCA		yam_NH_singleton_A328-33_8_c9177_3_a	NHsA8_c9177_3_aL	TGTGGC	6	24	(TGTGGC)	4	(TGTGGC)4			NHsA8_c9177_3_aL	(TGTGGC)4			NHsA8_c9177_3_aL	TGTGGC				NHsA8_c9177_3_a	NHsA8_c9177_3_aL	120
NHsA8_c9294_2_aL	CAGTTTTCCCAGTCACGACTGGGGATTAGAATCAAAGAAGGTG	NHsA8_c9294_2_aR	GTTTATCAGGTACCCTGTTGGACAACTC	(TCTT)6	(TCTT)6	TCTT	117	130	117-130	Polymorphic													Wc_1562_aL	CAGTTTTCCCAGTCACGACTGACCAGAACCCACTCAGTGTTTA		yam_NH_singleton_A328-33_8_c9294_2_a	NHsA8_c9294_2_aL	TCTT	4	24	(TCTT)	6	(TCTT)6			NHsA8_c9294_2_aL	(TCTT)6			NHsA8_c9294_2_aL	TCTT				NHsA8_c9294_2_a	NHsA8_c9294_2_aL	117
NHsB9_c12106_2_aL	CAGTTTTCCCAGTCACGACAAGCTTCTTGACTTCGAGTGATGG	NHsB9_c12106_2_aR	GTTTCATCTCTTCCGATCTCCTCTTCAC	(GATGGA)4	(GATGGA)4	GATGGA	115	140	115-140	Polymorphic													Wc_1577_aL	CAGTTTTCCCAGTCACGACGGATGAGGCTTTCTTCTCATCAAA		yam_NH_singleton_B310-33_9_c12106_2_a	NHsB9_c12106_2_aL	GATGGA	6	24	(GATGGA)	4	(GATGGA)4			NHsB9_c12106_2_aL	(GATGGA)4			NHsB9_c12106_2_aL	GATGGA				NHsB9_c12106_2_a	NHsB9_c12106_2_aL	115
NHsB9_c12383_2_aL	CAGTTTTCCCAGTCACGACTTCAAAGCGAATTTTGGAAGAGAG	NHsB9_c12383_2_aR	GTTTTTATTTTCCTTCCTACTGCTCGCC	(GA)12	(GA)12	GA	115	115	115-115	Monomorphic													Wc_1582_aL	CAGTTTTCCCAGTCACGACACTAGTCCACATAGGCGACCAGAG		yam_NH_singleton_B310-33_9_c12383_2_a	NHsB9_c12383_2_aL	GA	2	24	(GA)	12	(GA)12			NHsB9_c12383_2_aL	(GA)12			NHsB9_c12383_2_aL	GA				NHsB9_c12383_2_a	NHsB9_c12383_2_aL	115
NHsB9_c12502_2_aL	CAGTTTTCCCAGTCACGACTCAGACCATACACTTCAGCCAAAA	NHsB9_c12502_2_aR	GTTTTGTATTTTGTCTGGCTCTTTGCAG	(ATACAA)4	(ATACAA)4	ATACAA	147	170	147-170	Polymorphic													Wc_1596_aL	CAGTTTTCCCAGTCACGACAGCAATTCTTCAAGCTGCACAAG		yam_NH_singleton_B310-33_9_c12502_2_a	NHsB9_c12502_2_aL	ATACAA	6	24	(ATACAA)	4	(ATACAA)4			NHsB9_c12502_2_aL	(ATACAA)4			NHsB9_c12502_2_aL	ATACAA				NHsB9_c12502_2_a	NHsB9_c12502_2_aL	147
NHsB9_c13279_2_aL	CAGTTTTCCCAGTCACGACGTTGGATCAACTGATTTTGCTCCT	NHsB9_c13279_2_aR	GTTTTTTTTGAGTTCTGCTCATGACTGC	(CTCTTG)4	(CTCTTG)4	CTCTTG	144	157	144-157	Polymorphic													Wc_1622_aL	CAGTTTTCCCAGTCACGACCATAACGCAAACACCAAAGGAAAC		yam_NH_singleton_B310-33_9_c13279_2_a	NHsB9_c13279_2_aL	CTCTTG	6	24	(CTCTTG)	4	(CTCTTG)4			NHsB9_c13279_2_aL	(CTCTTG)4			NHsB9_c13279_2_aL	CTCTTG				NHsB9_c13279_2_a	NHsB9_c13279_2_aL	144
NHc_3210_eL	CAGTTTTCCCAGTCACGACTGGTACAATGAGGAGAAAATCAAGG	NHc_3210_eR	GTTTGGATTCCGGTAATGGTACATCAACT	(GCC)8	(GCC)8	GCC	146	149	146-149	Polymorphic													Wc_1648_aL	CAGTTTTCCCAGTCACGACGGATGGAAAACGATGGTGATCT		yam_NH_contig_3210_e	NHc_3210_eL	GCC	3	24	(GCC)	8	(GCC)8			NHc_3210_eL	(GCC)8			NHc_3210_eL	GCC				NHc_3210_e	NHc_3210_eL	146
NHc_3428cL	CAGTTTTCCCAGTCACGACAGAAGCTCGAGAGATAGGGACAGG	NHc_3428cR	GTTTTGACAATCAGGACAATAGCAATACCA	(GA)12	(GA)12	GA	148	162	148-162	Polymorphic													Wc_1678_aL	CAGTTTTCCCAGTCACGACACGAGCACAAGTAAAAGAACTCCG		yam_NH_contig_3428_c	NHc_3428cL	GA	2	24	(GA)	12	(GA)12			NHc_3428cL	(GA)12			NHc_3428cL	GA				NHc_3428c	NHc_3428cL	148
NHc_1324_aL	CAGTTTTCCCAGTCACGACTAAGGACTTCGCAAAGGACATAGC	NHc_1324_aR	GTTTTAGTTCCGGGTACCAGAAGATTTG	(CCG)7	(CCG)7	CCG	127	136	127-136	Polymorphic													Wc_1683_aL	CAGTTTTCCCAGTCACGACTAGAGGTTGGAAGTTCATGGATGG		yam_NH_contig_1324_a	NHc_1324_aL	CCG	3	21	(CCG)	7	(CCG)7			NHc_1324_aL	(CCG)7			NHc_1324_aL	CCG				NHc_1324_a	NHc_1324_aL	127
NHc_1817_aL	CAGTTTTCCCAGTCACGACGGATCCTTCATCTGGTAGCTCAAA	NHc_1817_aR	GTTTGACCGGCTCCATGATTGTCTT	(GTG)7	(GTG)7	GTG	164	176	164-176	Polymorphic													Wc_818_aR	GTTTATACCCGAAGTGCTAGCAAGATCA		yam_NH_contig_1817_a	NHc_1817_aL	GTG	3	21	(GTG)	7	(GTG)7			NHc_1817_aL	(GTG)7			NHc_1817_aL	GTG				NHc_1817_a	NHc_1817_aL	164
NHc_3848_aL	CAGTTTTCCCAGTCACGACGCACCTTTTTCATCCCACAAGTAT	NHc_3848_aR	GTTTAAATTCACAATTGGGAGGAATTGA	(ACC)7	(ACC)7	ACC	161	180	161-180	Polymorphic													Wc_946_aR	GTTTTCTACTCTCCGGTTCAGATCATCC		yam_NH_contig_3848_a	NHc_3848_aL	ACC	3	21	(ACC)	7	(ACC)7			NHc_3848_aL	(ACC)7			NHc_3848_aL	ACC				NHc_3848_a	NHc_3848_aL	161
NHc_4784_aL	CAGTTTTCCCAGTCACGACGGTTCACCTCCTTCACTAAATCCC	NHc_4784_aR	GTTTCGAAAGAGAAAAAGAGATCGTCCA	(TGC)7	(TGC)7	TGC	170	183	170-183	Polymorphic													Wc_961_aR	GTTTACTCATCTCAACATCCGGTCTCA		yam_NH_contig_4784_a	NHc_4784_aL	TGC	3	21	(TGC)	7	(TGC)7			NHc_4784_aL	(TGC)7			NHc_4784_aL	TGC				NHc_4784_a	NHc_4784_aL	170
NHc_5720_aL	CAGTTTTCCCAGTCACGACACAATTCAACCTATCAAGTTTTGCAT	NHc_5720_aR	GTTTTGATCATTTGTTTTGTGAATTGAGG	(AAC)7	(AAC)7	AAC	167	176	167-176	Polymorphic													Ws87_c10411_aR	GTTTTCCAACTTTGGCTTTGACCTCTAC		yam_NH_contig_5720_a	NHc_5720_aL	AAC	3	21	(AAC)	7	(AAC)7			NHc_5720_aL	(AAC)7			NHc_5720_aL	AAC				NHc_5720_a	NHc_5720_aL	167
NHs87_c11990_aL	CAGTTTTCCCAGTCACGACGAGGAAGAGGACGAGGAGGAAG	NHs87_c11990_aR	GTTTTGCCGAAAGAAAGAGAAGAGAGAA	(GAG)7	(GAG)7	GAG	0	0	-	Didn't Work													Ws87_c4466_aR	GTTTGATATATCACCCCCTCCAAACTCTG		yam_NH_singleton_87-01091-33_1_c11990_a	NHs87_c11990_aL	GAG	3	21	(GAG)	7	(GAG)7			NHs87_c11990_aL	(GAG)7			NHs87_c11990_aL	GAG				NHs87_c11990_a	NHs87_c11990_aL
NHs87_lrc3986_aL	CAGTTTTCCCAGTCACGACGATATTTGGTGCTGGGTATGGAAG	NHs87_lrc3986_aR	GTTTCATTCAAAGTCTCAGTGACCACCA	(GGT)7	(GGT)7	GGT	49	58	49-58	Polymorphic													Ws87_c4471_aR	GTTTTCTATGGTAATATTGTGGGGCAGG		yam_NH_singleton_87-01091-33_1_lrc3986_a	NHs87_lrc3986_aL	GGT	3	21	(GGT)	7	(GGT)7			NHs87_lrc3986_aL	(GGT)7			NHs87_lrc3986_aL	GGT				NHs87_lrc3986_a	NHs87_lrc3986_aL	49
NHsA8_c11104_2_aL	CAGTTTTCCCAGTCACGACATTTTTCTTCATCGAGCGCAAATA	NHsA8_c11104_2_aR	GTTTTGGTTTTCCATATGTTTTCCATTCA	(TTG)7	(TTG)7	TTG	120	127	120-127	Polymorphic													Ws87_c4688_bR	GTTTGAAACAACCCGGACTTTGGTTTAG		yam_NH_singleton_A328-33_8_c11104_2_a	NHsA8_c11104_2_aL	TTG	3	21	(TTG)	7	(TTG)7			NHsA8_c11104_2_aL	(TTG)7			NHsA8_c11104_2_aL	TTG				NHsA8_c11104_2_a	NHsA8_c11104_2_aL	120
NHsA8_c14662_2_aL	CAGTTTTCCCAGTCACGACAGGTATGCGAATTCTTGAAACCAA	NHsA8_c14662_2_aR	GTTTACACAGTAATCCGAAGGCTATGCT	(GAT)7	(GAT)7	GAT	122	125	122-125	Polymorphic													Ws87_c6429_aR	GTTTATTGACAGCACAACAAGATCCTCC		yam_NH_singleton_A328-33_8_c14662_2_a	NHsA8_c14662_2_aL	GAT	3	21	(GAT)	7	(GAT)7			NHsA8_c14662_2_aL	(GAT)7			NHsA8_c14662_2_aL	GAT				NHsA8_c14662_2_a	NHsA8_c14662_2_aL	122
NHsA8_c8784_3_aL	CAGTTTTCCCAGTCACGACGAGGTGCCGAGGAAGACATTC	NHsA8_c8784_3_aR	GTTTCTCGCGGATTTGAATAGATGTTCT	(TGA)7	(TGA)7	TGA	131	147	131-147	Polymorphic													Ws87_c7137_aR	GTTTCTTCTTCACCCCACCTACTCCTCT		yam_NH_singleton_A328-33_8_c8784_3_a	NHsA8_c8784_3_aL	TGA	3	21	(TGA)	7	(TGA)7			NHsA8_c8784_3_aL	(TGA)7			NHsA8_c8784_3_aL	TGA				NHsA8_c8784_3_a	NHsA8_c8784_3_aL	131
NHsB9_c11075_2_aL	CAGTTTTCCCAGTCACGACAGTGTGGCCGAGTCTTCGAG	NHsB9_c11075_2_aR	GTTTGAGATGAAGGGAAGGGACGAC	(CCG)7	(CCG)7	CCG	110	113	110-113	Polymorphic													Ws87_c7312_aR	GTTTGTATGAAATGGGATCTAGGAGGGC		yam_NH_singleton_B310-33_9_c11075_2_a	NHsB9_c11075_2_aL	CCG	3	21	(CCG)	7	(CCG)7			NHsB9_c11075_2_aL	(CCG)7			NHsB9_c11075_2_aL	CCG				NHsB9_c11075_2_a	NHsB9_c11075_2_aL	110
NHsB9_c15621_2_aL	CAGTTTTCCCAGTCACGACTCTTGTGATAACCAGGAAGGCAAC	NHsB9_c15621_2_aR	GTTTTTGCCACCTTGCACCTATAAAATC	(TTG)7	(TTG)7	TTG	168	187	168-187	Polymorphic													Ws87_c7809_aR	GTTTCTCCAACTCCAACTCGACTCTCTC		yam_NH_singleton_B310-33_9_c15621_2_a	NHsB9_c15621_2_aL	TTG	3	21	(TTG)	7	(TTG)7			NHsB9_c15621_2_aL	(TTG)7			NHsB9_c15621_2_aL	TTG				NHsB9_c15621_2_a	NHsB9_c15621_2_aL	168
NHsB9_c3076_10_aL	CAGTTTTCCCAGTCACGACAGAAAGAACCCAAGACGGGCTAT	NHsB9_c3076_10_aR	GTTTTTCAGCCTTCAACCTTGTTTTGAT	(ATC)7	(ATC)7	ATC	62	126	62-126	Polymorphic													Ws87_lrc1697_aR	GTTTGTTGGTCTTCAAGTTCTTGTGGG		yam_NH_singleton_B310-33_9_c3076_10_a	NHsB9_c3076_10_aL	ATC	3	21	(ATC)	7	(ATC)7			NHsB9_c3076_10_aL	(ATC)7			NHsB9_c3076_10_aL	ATC				NHsB9_c3076_10_a	NHsB9_c3076_10_aL	62
NHc_4998cL	CAGTTTTCCCAGTCACGACCTTTGGTTGTTTGTTTGCTTCCTT	NHc_4998cR	GTTTCATACATATTCAATTGATGGACTCACAA	(TAT)7	(TAT)7	TAT	101	104	101-104	Polymorphic													WsA8_c10477_2_aR	GTTTATGCTCCAGTTTGAGAATGTAGGG		yam_NH_contig_4998_c	NHc_4998cL	TAT	3	21	(TAT)	7	(TAT)7			NHc_4998cL	(TAT)7			NHc_4998cL	TAT				NHc_4998c	NHc_4998cL	101
NHc_1504_aL	CAGTTTTCCCAGTCACGACAGATCTGAGCCTTTTCCCTCTTTA	NHc_1504_aR	GTTTTTTTATTGTTTGTTTTGATAGCATTGA	(AAGGA)4	(AAGGA)4	AAGGA	108	108	108-108	Monomorphic													WsA8_c13246_2_aR	GTTTTAGGTCTGGAGAGGAAGGATTGAA		yam_NH_contig_1504_a	NHc_1504_aL	AAGGA	5	20	(AAGGA)	4	(AAGGA)4			NHc_1504_aL	(AAGGA)4			NHc_1504_aL	AAGGA				NHc_1504_a	NHc_1504_aL	108
NHc_3467_aL	CAGTTTTCCCAGTCACGACTGGGACATTCTGCCTCTATTCTTC	NHc_3467_aR	GTTTAATGAAATCAAGAATTCCCAGCAA	(AT)10	(AT)10	AT	151	157	151-157	Polymorphic													WsA8_c14051_2_aR	GTTTATTACAAGAAGATCCTCAACCCCA		yam_NH_contig_3467_a	NHc_3467_aL	AT	2	20	(AT)	10	(AT)10			NHc_3467_aL	(AT)10			NHc_3467_aL	AT				NHc_3467_a	NHc_3467_aL	151
NHc_4375_aL	CAGTTTTCCCAGTCACGACTGTGTCTATTCTTTAAGCTGATGATGG	NHc_4375_aR	GTTTGGTTCATCACACACCCAATCTCTA	(TG)10	(TG)10	TG	171	184	171-184	Polymorphic													WsA8_c4604_9_aR	GTTTCAGAGGTATTGCACACTGAACCAG		yam_NH_contig_4375_a	NHc_4375_aL	TG	2	20	(TG)	10	(TG)10			NHc_4375_aL	(TG)10			NHc_4375_aL	TG				NHc_4375_a	NHc_4375_aL	171
NHc_4781_aL	CAGTTTTCCCAGTCACGACCTGAGATGGGCTGAGAGATTTTGT	NHc_4781_aR	GTTTGAGCTGCAAGAACTTCATGGTTTT	(AG)10	(AG)10	AG	158	171	158-171	Polymorphic													WsA8_c8305_3_aR	GTTTTTCACTGTGATAGCAATGTGAGCA		yam_NH_contig_4781_a	NHc_4781_aL	AG	2	20	(AG)	10	(AG)10			NHc_4781_aL	(AG)10			NHc_4781_aL	AG				NHc_4781_a	NHc_4781_aL	158
NHc_5011_bL	CAGTTTTCCCAGTCACGACGTGCTTTGCACGTGAGGGTATT	NHc_5011_bR	GTTTAGCTATCACCACAAAGATCCATCC	(TA)10	(TA)10	TA	178	212	178-212	Polymorphic													WsA8_c8655_3_aR	GTTTTCTCTCCCATAGTTTTCTCAGGCA		yam_NH_contig_5011_b	NHc_5011_bL	TA	2	20	(TA)	10	(TA)10			NHc_5011_bL	(TA)10			NHc_5011_bL	TA				NHc_5011_b	NHc_5011_bL	178
NHc_6846_aL	CAGTTTTCCCAGTCACGACGGCATATTTCCTGGGTTTTCATTA	NHc_6846_aR	GTTTTGTTCCTTTATTCATCTTGCTTGTG	(TA)10	(TA)10	TA	173	173	173-173	Monomorphic													WsB9_c10540_2_aR	GTTTCTTTCTGGGCTGTTCCCACC		yam_NH_contig_6846_a	NHc_6846_aL	TA	2	20	(TA)	10	(TA)10			NHc_6846_aL	(TA)10			NHc_6846_aL	TA				NHc_6846_a	NHc_6846_aL	173
NHs87_c11619_aL	CAGTTTTCCCAGTCACGACCAGTTCCGCTGTTGGTTCCTTAC	NHs87_c11619_aR	GTTTGACCGATCCGGCCTTTTGTA	(AG)10	(AG)10	AG	0	0	-	Didn't Work													WsB9_c15149_2_aR	GTTTGAATCAGTGTGGTTGAAGCTGAGA		yam_NH_singleton_87-01091-33_1_c11619_a	NHs87_c11619_aL	AG	2	20	(AG)	10	(AG)10			NHs87_c11619_aL	(AG)10			NHs87_c11619_aL	AG				NHs87_c11619_a	NHs87_c11619_aL
NHs87_lrc3624_aL	CAGTTTTCCCAGTCACGACTCCTCTTTATTCTCCCCACAAACA	NHs87_lrc3624_aR	GTTTGGGTTTGTTTTACGTGTGTTTTCA	(AACA)5	(AACA)5	AACA	178	178	178-178	Monomorphic													Wc_2285_bR	GTTTCAGGGAGTCACAATTTCAGGATCT		yam_NH_singleton_87-01091-33_1_lrc3624_a	NHs87_lrc3624_aL	AACA	4	20	(AACA)	5	(AACA)5			NHs87_lrc3624_aL	(AACA)5			NHs87_lrc3624_aL	AACA				NHs87_lrc3624_a	NHs87_lrc3624_aL	178
NHsA8_c12061_3_aL	CAGTTTTCCCAGTCACGACAACGTTCCACTTCGTTCTTGTTTC	NHsA8_c12061_3_aR	GTTTTCTTGTCCTTTTTCTTTCATTTCCC	(TA)10	(TA)10	TA	156	164	156-164	Polymorphic													Wc_3031_bR	GTTTATCTCAGTAGCTCCAATGGGTTTG		yam_NH_singleton_A328-33_8_c12061_3_a	NHsA8_c12061_3_aL	TA	2	20	(TA)	10	(TA)10			NHsA8_c12061_3_aL	(TA)10			NHsA8_c12061_3_aL	TA				NHsA8_c12061_3_a	NHsA8_c12061_3_aL	156
NHsA8_c13007_2_aL	CAGTTTTCCCAGTCACGACTTAAAGGGTAACTGCTGCACACAA	NHsA8_c13007_2_aR	GTTTACTTTCACCTACCATCATCACCGT	(TA)10	(TA)10	TA	148	163	148-163	Polymorphic													Wc_5474_aR	GTTTTGATGATGATGGTTCCTTCACTGT		yam_NH_singleton_A328-33_8_c13007_2_a	NHsA8_c13007_2_aL	TA	2	20	(TA)	10	(TA)10			NHsA8_c13007_2_aL	(TA)10			NHsA8_c13007_2_aL	TA				NHsA8_c13007_2_a	NHsA8_c13007_2_aL	148
NHsA8_c13522_2_aL	CAGTTTTCCCAGTCACGACAAGATTGACTCAACACTTTTTGTTTG	NHsA8_c13522_2_aR	GTTTAGAAAATTTGAATCTCACCCCTTC	(TG)10	(TG)10	TG	175	187	175-187	Polymorphic													Wc_5905_bR	GTTTAGAACTCGGCAAATATATCATCGG		yam_NH_singleton_A328-33_8_c13522_2_a	NHsA8_c13522_2_aL	TG	2	20	(TG)	10	(TG)10			NHsA8_c13522_2_aL	(TG)10			NHsA8_c13522_2_aL	TG				NHsA8_c13522_2_a	NHsA8_c13522_2_aL	175
NHsA8_c3256_6_aL	CAGTTTTCCCAGTCACGACCTCCTCCTCCTGATCTTCCTGAAT	NHsA8_c3256_6_aR	GTTTCAACAATCAAAACCAATGGACTCA	(CATG)5	(CATG)5	CATG	131	139	131-139	Polymorphic													Wc_6254_bR	GTTTTCTTCAACATCAGCCCATTTCTTT		yam_NH_singleton_A328-33_8_c3256_6_a	NHsA8_c3256_6_aL	CATG	4	20	(CATG)	5	(CATG)5			NHsA8_c3256_6_aL	(CATG)5			NHsA8_c3256_6_aL	CATG				NHsA8_c3256_6_a	NHsA8_c3256_6_aL	131
NHsA8_c4030_10_aL	CAGTTTTCCCAGTCACGACCCAAAGTCATATCTTTATTGCAGGG	NHsA8_c4030_10_aR	GTTTTGCTCAATGACCACACTAACTCATC	(AAAT)5	(AAAT)5	AAAT	176	180	176-180	Polymorphic													Wc_1005_bR	GTTTTTCCTTCTCCTTCTCCTTCTCCTC		yam_NH_singleton_A328-33_8_c4030_10_a	NHsA8_c4030_10_aL	AAAT	4	20	(AAAT)	5	(AAAT)5			NHsA8_c4030_10_aL	(AAAT)5			NHsA8_c4030_10_aL	AAAT				NHsA8_c4030_10_a	NHsA8_c4030_10_aL	176
NHsA8_c9379_3_aL	CAGTTTTCCCAGTCACGACTTAGAGCATTTGCCAATCAAGGAT	NHsA8_c9379_3_aR	GTTTATTCCAAAATACACAATTGGTGCC	(AT)10	(AT)10	AT	150	170	150-170	Polymorphic													Wc_1013_bR	GTTTTTCAACCAGAATTCATCATCCTCA		yam_NH_singleton_A328-33_8_c9379_3_a	NHsA8_c9379_3_aL	AT	2	20	(AT)	10	(AT)10			NHsA8_c9379_3_aL	(AT)10			NHsA8_c9379_3_aL	AT				NHsA8_c9379_3_a	NHsA8_c9379_3_aL	150
NHsA8_c9564_2_aL	CAGTTTTCCCAGTCACGACAAAGATCTTGTCTTTTGATCTGTGAGC	NHsA8_c9564_2_aR	GTTTATGAAATCTATCCAAAGGCCAACA	(AAAT)5	(AAAT)5	AAAT	166	210	166-210	Polymorphic													Wc_1022_aR	GTTTCTTATCACTGCACATGCCAAAGTT		yam_NH_singleton_A328-33_8_c9564_2_a	NHsA8_c9564_2_aL	AAAT	4	20	(AAAT)	5	(AAAT)5			NHsA8_c9564_2_aL	(AAAT)5			NHsA8_c9564_2_aL	AAAT				NHsA8_c9564_2_a	NHsA8_c9564_2_aL	166
NHsA8_c9852_2_aL	CAGTTTTCCCAGTCACGACTGAATGAACATATGGATGAAAGGG	NHsA8_c9852_2_aR	GTTTAATTTGGAACAATGCAAAGCCTAA	(TTTA)5	(TTTA)5	TTTA	170	170	170-170	Monomorphic													Wc_1105_aR	GTTTGTTTTGAAGGTGAGGCTTTTGATG		yam_NH_singleton_A328-33_8_c9852_2_a	NHsA8_c9852_2_aL	TTTA	4	20	(TTTA)	5	(TTTA)5			NHsA8_c9852_2_aL	(TTTA)5			NHsA8_c9852_2_aL	TTTA				NHsA8_c9852_2_a	NHsA8_c9852_2_aL	170
NHsB9_c10419_2_aL	CAGTTTTCCCAGTCACGACAAAGTGAAAACAGGCATGGAAACT	NHsB9_c10419_2_aR	GTTTCTCCTTTTGTGTGTATTATCATTTGTCA	(AATAA)4	(AATAA)4	AATAA	162	162	162-162	Monomorphic													Wc_114_aR	GTTTTTTATCCTTTAGCATGCCCAGAAA		yam_NH_singleton_B310-33_9_c10419_2_a	NHsB9_c10419_2_aL	AATAA	5	20	(AATAA)	4	(AATAA)4			NHsB9_c10419_2_aL	(AATAA)4			NHsB9_c10419_2_aL	AATAA				NHsB9_c10419_2_a	NHsB9_c10419_2_aL	162
NHsB9_c13489_2_aL	CAGTTTTCCCAGTCACGACTCCTGTTATGTTTGCTTTTGACATTT	NHsB9_c13489_2_aR	GTTTTGCTTGAGGTAATACTTGCTCATCAT	(AT)10	(AT)10	AT	103	181	103-181	Polymorphic													Wc_1198_aR	GTTTTTAGGATCCACTCCAAAGTCGAAG		yam_NH_singleton_B310-33_9_c13489_2_a	NHsB9_c13489_2_aL	AT	2	20	(AT)	10	(AT)10			NHsB9_c13489_2_aL	(AT)10			NHsB9_c13489_2_aL	AT				NHsB9_c13489_2_a	NHsB9_c13489_2_aL	103
NHsB9_c13560_2_aL	CAGTTTTCCCAGTCACGACCTCTTCTCGCTGCGATCCTCT	NHsB9_c13560_2_aR	GTTTCAAAAGAATCAATCAACCCTCCAG	(GA)10	(GA)10	GA	0	0	-	Didn't Work													Wc_1235_aR	GTTTGGTTAGCTGACTTTGATTGGAGGA		yam_NH_singleton_B310-33_9_c13560_2_a	NHsB9_c13560_2_aL	GA	2	20	(GA)	10	(GA)10			NHsB9_c13560_2_aL	(GA)10			NHsB9_c13560_2_aL	GA				NHsB9_c13560_2_a	NHsB9_c13560_2_aL
NHsB9_c14836_2_aL	CAGTTTTCCCAGTCACGACATTTGTAAGTCGAACTGGTCTGGC	NHsB9_c14836_2_aR	GTTTACATGTGCCCATTTAAGACTTGGT	(CCAC)5	(CCAC)5	CCAC	153	157	153-157	Polymorphic													Wc_134_aR	GTTTGTTCCTCTTTAGCTCCACGACCTT		yam_NH_singleton_B310-33_9_c14836_2_a	NHsB9_c14836_2_aL	CCAC	4	20	(CCAC)	5	(CCAC)5			NHsB9_c14836_2_aL	(CCAC)5			NHsB9_c14836_2_aL	CCAC				NHsB9_c14836_2_a	NHsB9_c14836_2_aL	153
NHsB9_c15008_2_aL	CAGTTTTCCCAGTCACGACGCCGTAAATGCAATAACATTAACTTCA	NHsB9_c15008_2_aR	GTTTGCATTCCAAGTGAAGAGAAACGTC	(AAAT)5	(AAAT)5	AAAT	0	0	-	Didn't Work													Wc_1401_bR	GTTTTGAGAAGAGGTTTCTTGGGATCAG		yam_NH_singleton_B310-33_9_c15008_2_a	NHsB9_c15008_2_aL	AAAT	4	20	(AAAT)	5	(AAAT)5			NHsB9_c15008_2_aL	(AAAT)5			NHsB9_c15008_2_aL	AAAT				NHsB9_c15008_2_a	NHsB9_c15008_2_aL
NHsB9_c15281_2_aL	CAGTTTTCCCAGTCACGACGGTGAGGTGGAACTCTAAACCAAA	NHsB9_c15281_2_aR	GTTTAAGCATAACAACGTCTAGATCGGC	(TATT)5	(TATT)5	TATT	119	119	119-119	Monomorphic													Wc_1404_aR	GTTTGTCAGTGATGTTTTCGATCTCCCT		yam_NH_singleton_B310-33_9_c15281_2_a	NHsB9_c15281_2_aL	TATT	4	20	(TATT)	5	(TATT)5			NHsB9_c15281_2_aL	(TATT)5			NHsB9_c15281_2_aL	TATT				NHsB9_c15281_2_a	NHsB9_c15281_2_aL	119
NHsB9_c5688_4_aL	CAGTTTTCCCAGTCACGACAAATGTTTGAGCAGGATGGATTGT	NHsB9_c5688_4_aR	GTTTGCTCACCCTTTTCTTGGTTCGT	(AATA)5	(AATA)5	AATA	102	132	102-132	Polymorphic													Wc_1416_aR	GTTTTCCTTGATCACGTCAAGGGAAG		yam_NH_singleton_B310-33_9_c5688_4_a	NHsB9_c5688_4_aL	AATA	4	20	(AATA)	5	(AATA)5			NHsB9_c5688_4_aL	(AATA)5			NHsB9_c5688_4_aL	AATA				NHsB9_c5688_4_a	NHsB9_c5688_4_aL	102
NHc_1778_aL	CAGTTTTCCCAGTCACGACTGATGATGAGAAGAAGAGCGAGAA	NHc_1778_aR	GTTTTCTCACTATCATCAATCTCCGGCT	(AAG)6	(AAG)6	AAG	0	0	-	Didn't Work													Wc_1429_aR	GTTTACAAGCAGGTTGGTAACAGGATCA		yam_NH_contig_1778_a	NHc_1778_aL	AAG	3	18	(AAG)	6	(AAG)6			NHc_1778_aL	(AAG)6			NHc_1778_aL	AAG				NHc_1778_a	NHc_1778_aL
NHc_268_aL	CAGTTTTCCCAGTCACGACATCTGACGGGAAGCCAATCAT	NHc_268_aR	GTTTCTCTCTGGCTCCCAGTTCTTCATA	(AGC)6	(AGC)6	AGC	125	178	125-178	Polymorphic													Wc_1459_aR	GTTTACCACAATGAGTTTTCCTGCATTT		yam_NH_contig_268_a	NHc_268_aL	AGC	3	18	(AGC)	6	(AGC)6			NHc_268_aL	(AGC)6			NHc_268_aL	AGC				NHc_268_a	NHc_268_aL	125
NHc_3698_aL	CAGTTTTCCCAGTCACGACAAATGAGCAATGACAATGAACGAA	NHc_3698_aR	GTTTTGGTGGTTTCTCATTTCCTCCTAA	(GAT)6	(GAT)6	GAT	135	142	135-142	Polymorphic													Wc_1531_aR	GTTTGACCTTGAGATGAAGGAGGAGGAT		yam_NH_contig_3698_a	NHc_3698_aL	GAT	3	18	(GAT)	6	(GAT)6			NHc_3698_aL	(GAT)6			NHc_3698_aL	GAT				NHc_3698_a	NHc_3698_aL	135
NHc_3786_aL	CAGTTTTCCCAGTCACGACCCAGTATTGAGCAGTAACAGCAGC	NHc_3786_aR	GTTTCAACTTCTGCTTCTTCACAGGCTT	(TGG)6	(TGG)6	TGG	111	179	111-179	Polymorphic													Wc_1535_aR	GTTTTGCATGAGTCGAAATTCATAGGTG		yam_NH_contig_3786_a	NHc_3786_aL	TGG	3	18	(TGG)	6	(TGG)6			NHc_3786_aL	(TGG)6			NHc_3786_aL	TGG				NHc_3786_a	NHc_3786_aL	111
NHc_7097_aL	CAGTTTTCCCAGTCACGACTCGTCTCCCTTTGATACCTCTTTG	NHc_7097_aR	GTTTGCTAACCAAGACTTGCGGAGACT	(TCT)6	(TCT)6	TCT	144	167	144-167	Polymorphic													Wc_1562_aR	GTTTGTCACCTCAGCAATGCACATCTT		yam_NH_contig_7097_a	NHc_7097_aL	TCT	3	18	(TCT)	6	(TCT)6			NHc_7097_aL	(TCT)6			NHc_7097_aL	TCT				NHc_7097_a	NHc_7097_aL	144
NHs87_c10771_aL	CAGTTTTCCCAGTCACGACCCTCTTCCGCACCACTCTCTTAG	NHs87_c10771_aR	GTTTAGGAGGAGAGGACGGTGAGAAGT	(CTC)6	(CTC)6	CTC	0	0	-	Didn't Work													Wc_1577_aR	GTTTATCCAATCTGGCACTAACAGGAGT		yam_NH_singleton_87-01091-33_1_c10771_a	NHs87_c10771_aL	CTC	3	18	(CTC)	6	(CTC)6			NHs87_c10771_aL	(CTC)6			NHs87_c10771_aL	CTC				NHs87_c10771_a	NHs87_c10771_aL
NHs87_c5683_aL	CAGTTTTCCCAGTCACGACAAGCTTAGAGCAACGAGAGCTCAA	NHs87_c5683_aR	GTTTATCAATGGATAGAACCGAAACGAA	(GTC)6	(GTC)6	GTC	156	156	156-156	Monomorphic													Wc_1582_aR	GTTTGGATGGTCAGTACCGTCACTCTTC		yam_NH_singleton_87-01091-33_1_c5683_a	NHs87_c5683_aL	GTC	3	18	(GTC)	6	(GTC)6			NHs87_c5683_aL	(GTC)6			NHs87_c5683_aL	GTC				NHs87_c5683_a	NHs87_c5683_aL	156
NHs87_c940_aL	CAGTTTTCCCAGTCACGACTGTCACCAGGGCTTTTATCTTTGT	NHs87_c940_aR	GTTTTAAACTTCAGTCAGACCACCACCA	(GGT)6	(GGT)6	GGT	64	67	64-67	Polymorphic													Wc_1596_aR	GTTTCCAACCATCTCCTTCACATTCACT		yam_NH_singleton_87-01091-33_1_c940_a	NHs87_c940_aL	GGT	3	18	(GGT)	6	(GGT)6			NHs87_c940_aL	(GGT)6			NHs87_c940_aL	GGT				NHs87_c940_a	NHs87_c940_aL	64
NHs87_lrc7540_aL	CAGTTTTCCCAGTCACGACGCAACGAGGACATCAACAATAACA	NHs87_lrc7540_aR	GTTTGTCTGAGATGTTGGGAATAGCACC	(AAC)6	(AAC)6	AAC	109	112	109-112	Polymorphic													Wc_1622_aR	GTTTTTATCACCTGTTGAGGGACACAGA		yam_NH_singleton_87-01091-33_1_lrc7540_a	NHs87_lrc7540_aL	AAC	3	18	(AAC)	6	(AAC)6			NHs87_lrc7540_aL	(AAC)6			NHs87_lrc7540_aL	AAC				NHs87_lrc7540_a	NHs87_lrc7540_aL	109
NHs87_lrc9940_aL	CAGTTTTCCCAGTCACGACACCTGGAGTGACCAAACAGAAGAG	NHs87_lrc9940_aR	GTTTTCACCAAGGAAATCAGAAGTGTCA	(GAT)6	(GAT)6	GAT	166	169	166-169	Polymorphic													Wc_1648_aR	GTTTCTCATCGTTGATGATTTGATACGC		yam_NH_singleton_87-01091-33_1_lrc9940_a	NHs87_lrc9940_aL	GAT	3	18	(GAT)	6	(GAT)6			NHs87_lrc9940_aL	(GAT)6			NHs87_lrc9940_aL	GAT				NHs87_lrc9940_a	NHs87_lrc9940_aL	166
NHsA8_c10860_2_aL	CAGTTTTCCCAGTCACGACGACATAGTTCCATGGCTAGGAGGA	NHsA8_c10860_2_aR	GTTTGCAGACATGTGTGGAGATGGTACT	(ACA)6	(ACA)6	ACA	163	165	163-165	Polymorphic													Wc_1678_aR	GTTTTGGTACTGTCTGCTATGTTGCTCC		yam_NH_singleton_A328-33_8_c10860_2_a	NHsA8_c10860_2_aL	ACA	3	18	(ACA)	6	(ACA)6			NHsA8_c10860_2_aL	(ACA)6			NHsA8_c10860_2_aL	ACA				NHsA8_c10860_2_a	NHsA8_c10860_2_aL	163
NHsA8_c12200_2_aL	CAGTTTTCCCAGTCACGACTTAAAAAGATGCTGTTGCTGTTGC	NHsA8_c12200_2_aR	GTTTCTTTTTGCAGGAAACTTAATGAGTGA	(TGC)6	(TGC)6	TGC	116	128	116-128	Polymorphic													Wc_1683_aR	GTTTTCACCCTCTGAACATGATTAGCAA		yam_NH_singleton_A328-33_8_c12200_2_a	NHsA8_c12200_2_aL	TGC	3	18	(TGC)	6	(TGC)6			NHsA8_c12200_2_aL	(TGC)6			NHsA8_c12200_2_aL	TGC				NHsA8_c12200_2_a	NHsA8_c12200_2_aL	116
NHsA8_c13110_2_aL	CAGTTTTCCCAGTCACGACCCAATTCGTAGGGGAGAGTTCAG	NHsA8_c13110_2_aR	GTTTCCTCTGGATTGGTACCTCATGATT	(CAG)6	(CAG)6	CAG	104	104	104-104	Monomorphic																yam_NH_singleton_A328-33_8_c13110_2_a	NHsA8_c13110_2_aL	CAG	3	18	(CAG)	6	(CAG)6			NHsA8_c13110_2_aL	(CAG)6			NHsA8_c13110_2_aL	CAG				NHsA8_c13110_2_a	NHsA8_c13110_2_aL	104
NHsA8_c14339_2_aL	CAGTTTTCCCAGTCACGACTCAAAGAGCTATCAAAGAAGGATGAAA	NHsA8_c14339_2_aR	GTTTATGGAGATGTGATTGATGTTGTGG	(AAC)6	(AAC)6	AAC	124	124	124-124	Monomorphic													Wc_1721_aL	CAGTTTTCCCAGTCACGACGACGAGCTTCAGGACTCTTTCAAC		yam_NH_singleton_A328-33_8_c14339_2_a	NHsA8_c14339_2_aL	AAC	3	18	(AAC)	6	(AAC)6			NHsA8_c14339_2_aL	(AAC)6			NHsA8_c14339_2_aL	AAC				NHsA8_c14339_2_a	NHsA8_c14339_2_aL	124
NHsA8_c3500_6_aL	CAGTTTTCCCAGTCACGACCAGAGTTGAAGGTATGATATGCATGG	NHsA8_c3500_6_aR	GTTTTGTTGATGAACTAATTAACAAAAGGCA	(CTT)6	(CTT)6	CTT	165	165	165-165	Monomorphic													Wc_1746_aL	CAGTTTTCCCAGTCACGACCTGTCAACAGTTTATCAGGGCCTC		yam_NH_singleton_A328-33_8_c3500_6_a	NHsA8_c3500_6_aL	CTT	3	18	(CTT)	6	(CTT)6			NHsA8_c3500_6_aL	(CTT)6			NHsA8_c3500_6_aL	CTT				NHsA8_c3500_6_a	NHsA8_c3500_6_aL	165
NHsB9_c10079_2_aL	CAGTTTTCCCAGTCACGACACCCTCCAAAACCAAGTGCTTATC	NHsB9_c10079_2_aR	GTTTATGTTGTCGCGCGAGATATTTATT	(AAT)6	(AAT)6	AAT	147	150	147-150	Polymorphic													Wc_1748_aL	CAGTTTTCCCAGTCACGACTTGTTGCTTTGGTAAAGATCCCAT		yam_NH_singleton_B310-33_9_c10079_2_a	NHsB9_c10079_2_aL	AAT	3	18	(AAT)	6	(AAT)6			NHsB9_c10079_2_aL	(AAT)6			NHsB9_c10079_2_aL	AAT				NHsB9_c10079_2_a	NHsB9_c10079_2_aL	147
NHsB9_c11446_2_bL	CAGTTTTCCCAGTCACGACAGGCTACAAAAGATGCACCTGAAG	NHsB9_c11446_2_bR	GTTTTAGAGTGGTTGCAAAGAGTGCAAG	(CCA)6	(CCA)6	CCA	142	142	142-142	Monomorphic													Wc_1789_aL	CAGTTTTCCCAGTCACGACGTCCAAGGGATGAATGAAGTTTTG		yam_NH_singleton_B310-33_9_c11446_2_b	NHsB9_c11446_2_bL	CCA	3	18	(CCA)	6	(CCA)6			NHsB9_c11446_2_bL	(CCA)6			NHsB9_c11446_2_bL	CCA				NHsB9_c11446_2_b	NHsB9_c11446_2_bL	142
NHsB9_c11476_3_aL	CAGTTTTCCCAGTCACGACTCAAACGCCAATTAACATACTCCA	NHsB9_c11476_3_aR	GTTTAGTATGTAATGCGAACCCTAAGGC	(AAC)6	(AAC)6	AAC	155	161	155-161	Polymorphic													Wc_1831_bL	CAGTTTTCCCAGTCACGACAGCAGCAACAGCATCTACAACAAC		yam_NH_singleton_B310-33_9_c11476_3_a	NHsB9_c11476_3_aL	AAC	3	18	(AAC)	6	(AAC)6			NHsB9_c11476_3_aL	(AAC)6			NHsB9_c11476_3_aL	AAC				NHsB9_c11476_3_a	NHsB9_c11476_3_aL	155
NHsB9_c12604_2_aL	CAGTTTTCCCAGTCACGACGACGAGAACTTGAATGACCGATCT	NHsB9_c12604_2_aR	GTTTCATTTGGGCAGCTCATATAGGAAT	(CAA)6	(CAA)6	CAA	141	148	141-148	Polymorphic													Wc_1915_aL	CAGTTTTCCCAGTCACGACTCAGCACAAGTGAGTATTTCAGCC		yam_NH_singleton_B310-33_9_c12604_2_a	NHsB9_c12604_2_aL	CAA	3	18	(CAA)	6	(CAA)6			NHsB9_c12604_2_aL	(CAA)6			NHsB9_c12604_2_aL	CAA				NHsB9_c12604_2_a	NHsB9_c12604_2_aL	141
NHsB9_c12667_2_aL	CAGTTTTCCCAGTCACGACTCAGAGTCTTTTTCATTTGATCTGC	NHsB9_c12667_2_aR	GTTTCTTAAACAGCTTACCATATCTTGAATGA	(TTG)6	(TTG)6	TTG	207	214	207-214	Polymorphic													Wc_1948_aL	CAGTTTTCCCAGTCACGACCTGTGGTGAAGAACAGCTTCAAAA		yam_NH_singleton_B310-33_9_c12667_2_a	NHsB9_c12667_2_aL	TTG	3	18	(TTG)	6	(TTG)6			NHsB9_c12667_2_aL	(TTG)6			NHsB9_c12667_2_aL	TTG				NHsB9_c12667_2_a	NHsB9_c12667_2_aL	207
NHsB9_c13182_2_aL	CAGTTTTCCCAGTCACGACCATCATGACTCACTTTGTAAACCCC	NHsB9_c13182_2_aR	GTTTCATAGCCATGATGGTCATCTTCAG	(CCT)6	(CCT)6	CCT	128	131	128-131	Polymorphic													Wc_1981_aL	CAGTTTTCCCAGTCACGACACCCGTACACTTATGACAGGCAAT		yam_NH_singleton_B310-33_9_c13182_2_a	NHsB9_c13182_2_aL	CCT	3	18	(CCT)	6	(CCT)6			NHsB9_c13182_2_aL	(CCT)6			NHsB9_c13182_2_aL	CCT				NHsB9_c13182_2_a	NHsB9_c13182_2_aL	128
NHsB9_c14199_2_aL	CAGTTTTCCCAGTCACGACATGAAGATGGAGGTGAGGATGAAA	NHsB9_c14199_2_aR	GTTTGATGGTAATCAGGAGCCTCAAGAA	(AGC)6	(AGC)6	AGC	135	139	135-139	Polymorphic													Wc_1982_aL	CAGTTTTCCCAGTCACGACTCCAGGGGAAAGTGCATATTGTAT		yam_NH_singleton_B310-33_9_c14199_2_a	NHsB9_c14199_2_aL	AGC	3	18	(AGC)	6	(AGC)6			NHsB9_c14199_2_aL	(AGC)6			NHsB9_c14199_2_aL	AGC				NHsB9_c14199_2_a	NHsB9_c14199_2_aL	135
NHsB9_c14481_2_aL	CAGTTTTCCCAGTCACGACTGGAAGATTTGGAGGTCGAGATAG	NHsB9_c14481_2_aR	GTTTCCTGTGCTCTTTAGAGGTGTCCC	(GTG)6	(GTG)6	GTG	172	202	172-202	Polymorphic													Wc_2033_aL	CAGTTTTCCCAGTCACGACAATGTTGTCCAGCTCTACGAGGTC		yam_NH_singleton_B310-33_9_c14481_2_a	NHsB9_c14481_2_aL	GTG	3	18	(GTG)	6	(GTG)6			NHsB9_c14481_2_aL	(GTG)6			NHsB9_c14481_2_aL	GTG				NHsB9_c14481_2_a	NHsB9_c14481_2_aL	172
NHsB9_c9943_3_aL	CAGTTTTCCCAGTCACGACAAACAAGGAAGCACAGACTACAGAGAA	NHsB9_c9943_3_aR	GTTTATTGAGTAGCGTACGTGAGAGCAA	(AAG)6	(AAG)6	AAG	145	151	145-151	Polymorphic													Wc_2142_aL	CAGTTTTCCCAGTCACGACTTTGCAGTTTAACCCTAACCCTCA		yam_NH_singleton_B310-33_9_c9943_3_a	NHsB9_c9943_3_aL	AAG	3	18	(AAG)	6	(AAG)6			NHsB9_c9943_3_aL	(AAG)6			NHsB9_c9943_3_aL	AAG				NHsB9_c9943_3_a	NHsB9_c9943_3_aL	145
NHc_451_aL	CAGTTTTCCCAGTCACGACTGAGTTCAAGTGGGAAGACATCTG	NHc_451_aR	GTTTGAGAAGATGCTAGCCTGCCGT	(CCT)6	(CCT)6	CCT	119	119	119-119	Monomorphic													Wc_2228_aL	CAGTTTTCCCAGTCACGACTTCTGCTCCGATATCTTCAACCTC		yam_NH_contig_451_a	NHc_451_aL	CCT	3	18	(CCT)	6	(CCT)6			NHc_451_aL	(CCT)6			NHc_451_aL	CCT				NHc_451_a	NHc_451_aL	119
NHc_116_aL	CAGTTTTCCCAGTCACGACAATGTTACAAACAGAGCACCAGCA	NHc_116_aR	GTTTCACAACACCATCATCCAAACTTTC	(AC)8	(AC)8	AC	127	137	127-137	Polymorphic													Wc_2318_aL	CAGTTTTCCCAGTCACGACGGTGAGGATCGTCGGAGATG		yam_NH_contig_116_a	NHc_116_aL	AC	2	16	(AC)	8	(AC)8			NHc_116_aL	(AC)8			NHc_116_aL	AC				NHc_116_a	NHc_116_aL	127
NHc_2801_aL	CAGTTTTCCCAGTCACGACCTTGATCATCATCTCCTCATCTTCAA	NHc_2801_aR	GTTTTCATGCATCTTCATCTCCACATCT	(TATG)4	(TATG)4	TATG	137	141	137-141	Polymorphic													Wc_2404_aL	CAGTTTTCCCAGTCACGACACTCCATTGTTGGAGTCTCATGGT		yam_NH_contig_2801_a	NHc_2801_aL	TATG	4	16	(TATG)	4	(TATG)4			NHc_2801_aL	(TATG)4			NHc_2801_aL	TATG				NHc_2801_a	NHc_2801_aL	137
NHc_4243_aL	CAGTTTTCCCAGTCACGACCAAAGCTTCTTGTTTTTCTTCCCC	NHc_4243_aR	GTTTACAACTGTTGCACAACATGCACT	(AG)8	(AG)8	AG	156	160	156-160	Polymorphic													Wc_2432_aL	CAGTTTTCCCAGTCACGACATCCTCGAAGGTTCTTCTCTCCAG		yam_NH_contig_4243_a	NHc_4243_aL	AG	2	16	(AG)	8	(AG)8			NHc_4243_aL	(AG)8			NHc_4243_aL	AG				NHc_4243_a	NHc_4243_aL	156
NHc_4316_aL	CAGTTTTCCCAGTCACGACGACATTATTAGGCGATTTCCGTGT	NHc_4316_aR	GTTTAATGTGATTGCCTGATGGTACAAG	(AT)8	(AT)8	AT	132	145	132-145	Polymorphic													Wc_2443_bL	CAGTTTTCCCAGTCACGACGAAAGTCATCTGGATTGCAAGGAT		yam_NH_contig_4316_a	NHc_4316_aL	AT	2	16	(AT)	8	(AT)8			NHc_4316_aL	(AT)8			NHc_4316_aL	AT				NHc_4316_a	NHc_4316_aL	132
NHc_4788_aL	CAGTTTTCCCAGTCACGACTCTCTTCTTCTCAAATCAAGTGGG	NHc_4788_aR	GTTTTTCTAGATTCGCGATTAATTTAACTTTT	(AT)8	(AT)8	AT	0	0	-	Didn't Work													Wc_2465_aL	CAGTTTTCCCAGTCACGACCGTTGTGTACCTGGTTGGTGG		yam_NH_contig_4788_a	NHc_4788_aL	AT	2	16	(AT)	8	(AT)8			NHc_4788_aL	(AT)8			NHc_4788_aL	AT				NHc_4788_a	NHc_4788_aL
NHs87_c4761_aL	CAGTTTTCCCAGTCACGACTCAAGGTGGTTACTATGGTGGTCA	NHs87_c4761_aR	GTTTATGGCGATGCAAAGAGCTATATTT	(AT)8	(AT)8	AT	178	182	178-182	Polymorphic													Wc_2495_aL	CAGTTTTCCCAGTCACGACGTCTTTTCCCTTTGGATGACATTG		yam_NH_singleton_87-01091-33_1_c4761_a	NHs87_c4761_aL	AT	2	16	(AT)	8	(AT)8			NHs87_c4761_aL	(AT)8			NHs87_c4761_aL	AT				NHs87_c4761_a	NHs87_c4761_aL	178
NHs87_c8507_aL	CAGTTTTCCCAGTCACGACTTTTGCAGCAAGATAGGAACAAGA	NHs87_c8507_aR	GTTTCCTCCATCCCTTCTCTTGGATAGT	(AAAC)4	(AAAC)4	AAAC	179	179	179-179	Monomorphic													Wc_2498_aL	CAGTTTTCCCAGTCACGACGGCAACTGAATTGTGTTTCTTCG		yam_NH_singleton_87-01091-33_1_c8507_a	NHs87_c8507_aL	AAAC	4	16	(AAAC)	4	(AAAC)4			NHs87_c8507_aL	(AAAC)4			NHs87_c8507_aL	AAAC				NHs87_c8507_a	NHs87_c8507_aL	179
NHs87_lrc10426_aL	CAGTTTTCCCAGTCACGACAACACAAACAAGAAGTAAAACCATGC	NHs87_lrc10426_aR	GTTTTCCTCTTTTGATCTTTATATTCCATGC	(GCAT)4	(GCAT)4	GCAT	156	168	156-168	Polymorphic													Wc_2574_aL	CAGTTTTCCCAGTCACGACTGTGAAGCTTAAGTTATCGCCCAT		yam_NH_singleton_87-01091-33_1_lrc10426_a	NHs87_lrc10426_aL	GCAT	4	16	(GCAT)	4	(GCAT)4			NHs87_lrc10426_aL	(GCAT)4			NHs87_lrc10426_aL	GCAT				NHs87_lrc10426_a	NHs87_lrc10426_aL	156
NHs87_lrc3777_aL	CAGTTTTCCCAGTCACGACGGCTATGGAGTTTGTGGCACTTAT	NHs87_lrc3777_aR	GTTTGAGAATTCTTACCCGTACATTAAACCA	(TG)8	(TG)8	TG	135	147	135-147	Polymorphic													Wc_2639_bL	CAGTTTTCCCAGTCACGACTGCAGTCAGTGAGGAGTGTGAAAT		yam_NH_singleton_87-01091-33_1_lrc3777_a	NHs87_lrc3777_aL	TG	2	16	(TG)	8	(TG)8			NHs87_lrc3777_aL	(TG)8			NHs87_lrc3777_aL	TG				NHs87_lrc3777_a	NHs87_lrc3777_aL	135
NHsA8_c10866_2_bL	CAGTTTTCCCAGTCACGACGAAGTAGCAGCAGTATGCTTTGGAA	NHsA8_c10866_2_bR	GTTTTGAAAATAAAACCATCTCCTCCCA	(TATT)4	(TATT)4	TATT	281	281	281-281	Monomorphic													Wc_2657_aL	CAGTTTTCCCAGTCACGACATACCTATAAGAGGCCGAGGCAGT		yam_NH_singleton_A328-33_8_c10866_2_b	NHsA8_c10866_2_bL	TATT	4	16	(TATT)	4	(TATT)4			NHsA8_c10866_2_bL	(TATT)4			NHsA8_c10866_2_bL	TATT				NHsA8_c10866_2_b	NHsA8_c10866_2_bL	281
NHsA8_c10893_2_aL	CAGTTTTCCCAGTCACGACACGACTGGAATGGATCAGTGCTAT	NHsA8_c10893_2_aR	GTTTAAAGTGAGGTGAATTTCCATTTCTTCT	(AAAG)4	(AAAG)4	AAAG	176	176	176-176	Monomorphic													Wc_2732_aL	CAGTTTTCCCAGTCACGACGAGGTCCTGATATCGCTCTACACG		yam_NH_singleton_A328-33_8_c10893_2_a	NHsA8_c10893_2_aL	AAAG	4	16	(AAAG)	4	(AAAG)4			NHsA8_c10893_2_aL	(AAAG)4			NHsA8_c10893_2_aL	AAAG				NHsA8_c10893_2_a	NHsA8_c10893_2_aL	176
NHsA8_c11238_2_aL	CAGTTTTCCCAGTCACGACCCATATTAGCACAAGCAAGTCAAATC	NHsA8_c11238_2_aR	GTTTTCATTTCCTCTTTGTTTATGTTCTTGTT	(TTTC)4	(TTTC)4	TTTC	180	180	180-180	Monomorphic													Wc_2749_aL	CAGTTTTCCCAGTCACGACCTCTCTTTCTGCCAGCACTCTCA		yam_NH_singleton_A328-33_8_c11238_2_a	NHsA8_c11238_2_aL	TTTC	4	16	(TTTC)	4	(TTTC)4			NHsA8_c11238_2_aL	(TTTC)4			NHsA8_c11238_2_aL	TTTC				NHsA8_c11238_2_a	NHsA8_c11238_2_aL	180
NHsA8_c12281_2_aL	CAGTTTTCCCAGTCACGACGAATTGAATGAGACCAAGCTGTCC	NHsA8_c12281_2_aR	GTTTAAGGCTGGTTCTTCTGGAAATCAT	(AT)8	(AT)8	AT	160	171	160-171	Polymorphic													Wc_3037_aL	CAGTTTTCCCAGTCACGACCCGAGGAGGAGTTTAACATTGAGA		yam_NH_singleton_A328-33_8_c12281_2_a	NHsA8_c12281_2_aL	AT	2	16	(AT)	8	(AT)8			NHsA8_c12281_2_aL	(AT)8			NHsA8_c12281_2_aL	AT				NHsA8_c12281_2_a	NHsA8_c12281_2_aL	160
NHsA8_c3719_7_aL	CAGTTTTCCCAGTCACGACTGGCTTTGAATTTTGCTTCAATCT	NHsA8_c3719_7_aR	GTTTGACTTTTGGGTACTTCCCCGTAAT	(TTTA)4	(TTTA)4	TTTA	183	183	183-183	Monomorphic													Wc_3057_aL	CAGTTTTCCCAGTCACGACCATTGTCTCTCATATGGGGACCTC		yam_NH_singleton_A328-33_8_c3719_7_a	NHsA8_c3719_7_aL	TTTA	4	16	(TTTA)	4	(TTTA)4			NHsA8_c3719_7_aL	(TTTA)4			NHsA8_c3719_7_aL	TTTA				NHsA8_c3719_7_a	NHsA8_c3719_7_aL	183
NHsA8_c4009_5_aL	CAGTTTTCCCAGTCACGACAATTGCTCTAATCCCTCCCATCTC	NHsA8_c4009_5_aR	GTTTCGCTTGTTTTCTCTCAACTCTTTCTC	(GA)8	(GA)8	GA	146	148	146-148	Polymorphic													Wc_3062_aL	CAGTTTTCCCAGTCACGACCTGTTGAAGAAGGATGGCAAAAAG		yam_NH_singleton_A328-33_8_c4009_5_a	NHsA8_c4009_5_aL	GA	2	16	(GA)	8	(GA)8			NHsA8_c4009_5_aL	(GA)8			NHsA8_c4009_5_aL	GA				NHsA8_c4009_5_a	NHsA8_c4009_5_aL	146
NHsA8_c4553_8_aL	CAGTTTTCCCAGTCACGACGCACAAACTTACAACAATGAAATGAAA	NHsA8_c4553_8_aR	GTTTTGGAACCTCTTTATGGTTGAGGAA	(CA)8	(CA)8	CA	170	219	170-219	Polymorphic													Wc_3092_aL	CAGTTTTCCCAGTCACGACTATGCTCTTTAGCTGGACTCGGAT		yam_NH_singleton_A328-33_8_c4553_8_a	NHsA8_c4553_8_aL	CA	2	16	(CA)	8	(CA)8			NHsA8_c4553_8_aL	(CA)8			NHsA8_c4553_8_aL	CA				NHsA8_c4553_8_a	NHsA8_c4553_8_aL	170
NHsA8_c4665_6_aL	CAGTTTTCCCAGTCACGACCAAACTCATTTTTGAAAACCTGCC	NHsA8_c4665_6_aR	GTTTTGGTTCTCATTTGAAATACCTGCC	(GAAT)4	(GAAT)4	GAAT	124	124	124-124	Monomorphic													Wc_3126_aL	CAGTTTTCCCAGTCACGACGAGTGGAACTCCTTGGGTTGTAGA		yam_NH_singleton_A328-33_8_c4665_6_a	NHsA8_c4665_6_aL	GAAT	4	16	(GAAT)	4	(GAAT)4			NHsA8_c4665_6_aL	(GAAT)4			NHsA8_c4665_6_aL	GAAT				NHsA8_c4665_6_a	NHsA8_c4665_6_aL	124
NHsA8_c5834_4_aL	CAGTTTTCCCAGTCACGACCCGAAACCAGAAATAGAAAACAGTCA	NHsA8_c5834_4_aR	GTTTCTAAAGAAGCCTCGAATGTCGGAT	(AAAT)4	(AAAT)4	AAAT	176	176	176-176	Monomorphic													Wc_32_aL	CAGTTTTCCCAGTCACGACGTCGTCATCGCTCTCTTCTTTCTC		yam_NH_singleton_A328-33_8_c5834_4_a	NHsA8_c5834_4_aL	AAAT	4	16	(AAAT)	4	(AAAT)4			NHsA8_c5834_4_aL	(AAAT)4			NHsA8_c5834_4_aL	AAAT				NHsA8_c5834_4_a	NHsA8_c5834_4_aL	176
NHsA8_c6180_3_aL	CAGTTTTCCCAGTCACGACGCAAAATGCCTTTTTCTCTTAAATTG	NHsA8_c6180_3_aR	GTTTTGCCTTTCTTTTTCTTTCATCCTG	(AT)8	(AT)8	AT	130	136	130-136	Polymorphic													Wc_3230_aL	CAGTTTTCCCAGTCACGACATAAATCTGGATGGCAGCTTGAGA		yam_NH_singleton_A328-33_8_c6180_3_a	NHsA8_c6180_3_aL	AT	2	16	(AT)	8	(AT)8			NHsA8_c6180_3_aL	(AT)8			NHsA8_c6180_3_aL	AT				NHsA8_c6180_3_a	NHsA8_c6180_3_aL	130
NHsA8_c9967_2_aL	CAGTTTTCCCAGTCACGACTTTATCCAGCAAAAGCAAGAGACTT	NHsA8_c9967_2_aR	GTTTCATTTTTCAGTCAAGCAGGAAACA	(CA)8	(CA)8	CA	127	127	127-127	Monomorphic													Wc_3253_bL	CAGTTTTCCCAGTCACGACTCCTTCCCAGCAATCTATACATCC		yam_NH_singleton_A328-33_8_c9967_2_a	NHsA8_c9967_2_aL	CA	2	16	(CA)	8	(CA)8			NHsA8_c9967_2_aL	(CA)8			NHsA8_c9967_2_aL	CA				NHsA8_c9967_2_a	NHsA8_c9967_2_aL	127
NHsB9_c10661_2_aL	CAGTTTTCCCAGTCACGACGCTCAAAACAATTCACTAGTTTGAAAG	NHsB9_c10661_2_aR	GTTTAAAGGTTTCGTGCAAGTAAGAGTG	(TAAA)4	(TAAA)4	TAAA	121	129	121-129	Polymorphic													Wc_3263_aL	CAGTTTTCCCAGTCACGACCCGCAGCTTGTGAAATAAGAGAAG		yam_NH_singleton_B310-33_9_c10661_2_a	NHsB9_c10661_2_aL	TAAA	4	16	(TAAA)	4	(TAAA)4			NHsB9_c10661_2_aL	(TAAA)4			NHsB9_c10661_2_aL	TAAA				NHsB9_c10661_2_a	NHsB9_c10661_2_aL	121
NHsB9_c12804_2_aL	CAGTTTTCCCAGTCACGACGAAAGCATTGACAACCATGAAACA	NHsB9_c12804_2_aR	GTTTATTGATGCTCTTTGTTCTTGCTGC	(AT)8	(AT)8	AT	115	115	115-115	Monomorphic													Wc_3295_aL	CAGTTTTCCCAGTCACGACTGGTAGCTGATTACTGGACAACGA		yam_NH_singleton_B310-33_9_c12804_2_a	NHsB9_c12804_2_aL	AT	2	16	(AT)	8	(AT)8			NHsB9_c12804_2_aL	(AT)8			NHsB9_c12804_2_aL	AT				NHsB9_c12804_2_a	NHsB9_c12804_2_aL	115
NHsB9_c14405_2_aL	CAGTTTTCCCAGTCACGACGGATAAAAATTTACGAGTTCATTTGATT	NHsB9_c14405_2_aR	GTTTTTCCCCGATGAAACATTAAAGA	(TATT)4	(TATT)4	TATT	165	165	165-165	Monomorphic													Wc_3308_aL	CAGTTTTCCCAGTCACGACCCACTTTCATACTTCCCAGAATGG		yam_NH_singleton_B310-33_9_c14405_2_a	NHsB9_c14405_2_aL	TATT	4	16	(TATT)	4	(TATT)4			NHsB9_c14405_2_aL	(TATT)4			NHsB9_c14405_2_aL	TATT				NHsB9_c14405_2_a	NHsB9_c14405_2_aL	165
NHsB9_c15329_2_aL	CAGTTTTCCCAGTCACGACCAAATGCAACAAATTATCGCAAAA	NHsB9_c15329_2_aR	GTTTGGATCTTTGTTTGGTTTCTTGGTG	(AT)8	(AT)8	AT	130	166	130-166	Polymorphic													Wc_3386_aL	CAGTTTTCCCAGTCACGACAAGCTTCAGCTTTCACAAACTGCT		yam_NH_singleton_B310-33_9_c15329_2_a	NHsB9_c15329_2_aL	AT	2	16	(AT)	8	(AT)8			NHsB9_c15329_2_aL	(AT)8			NHsB9_c15329_2_aL	AT				NHsB9_c15329_2_a	NHsB9_c15329_2_aL	130
NHsB9_c5146_5_aL	CAGTTTTCCCAGTCACGACTCACTTCGAGCAAATACAAACACA	NHsB9_c5146_5_aR	GTTTGAATGGTGGACAAGAAGTCAGGTT	(TTAA)4	(TTAA)4	TTAA	162	162	162-162	Monomorphic													Wc_3434_aL	CAGTTTTCCCAGTCACGACGCTTGCCTGAACTTTGCTGATT		yam_NH_singleton_B310-33_9_c5146_5_a	NHsB9_c5146_5_aL	TTAA	4	16	(TTAA)	4	(TTAA)4			NHsB9_c5146_5_aL	(TTAA)4			NHsB9_c5146_5_aL	TTAA				NHsB9_c5146_5_a	NHsB9_c5146_5_aL	162
NHsB9_c8296_4_aL	CAGTTTTCCCAGTCACGACTGTTCATGGTAGTCTTGGCAGAAA	NHsB9_c8296_4_aR	GTTTACTTAATAAATGGCAAATGCACCC	(TTTA)4	(TTTA)4	TTTA	147	151	147-151	Polymorphic													Wc_3492_aL	CAGTTTTCCCAGTCACGACTTGGACAAAATCAGATACCGATGA		yam_NH_singleton_B310-33_9_c8296_4_a	NHsB9_c8296_4_aL	TTTA	4	16	(TTTA)	4	(TTTA)4			NHsB9_c8296_4_aL	(TTTA)4			NHsB9_c8296_4_aL	TTTA				NHsB9_c8296_4_a	NHsB9_c8296_4_aL	147
NHsB9_c9597_4_aL	CAGTTTTCCCAGTCACGACAAAATTGTCAACAAGACACCACC	NHsB9_c9597_4_aR	GTTTGGAGATGTGAGTCTGTTACGTGTG	(CT)8	(CT)8	CT	175	175	175-175	Monomorphic													Wc_3505_aL	CAGTTTTCCCAGTCACGACTTTAGTAGCAGCTTCTTTGCCGAG		yam_NH_singleton_B310-33_9_c9597_4_a	NHsB9_c9597_4_aL	CT	2	16	(CT)	8	(CT)8			NHsB9_c9597_4_aL	(CT)8			NHsB9_c9597_4_aL	CT				NHsB9_c9597_4_a	NHsB9_c9597_4_aL	175
NHsB9_c9853_3_aL	CAGTTTTCCCAGTCACGACCTAGCTCTTTTTCAGCTGCTCGTC	NHsB9_c9853_3_aR	GTTTAATCGCCATTGTCTTTAATGGTTG	(AT)8	(AT)8	AT	125	134	125-134	Polymorphic													Wc_3561_aL	CAGTTTTCCCAGTCACGACGAAATCCAGAGATTTTGTGTTGGG		yam_NH_singleton_B310-33_9_c9853_3_a	NHsB9_c9853_3_aL	AT	2	16	(AT)	8	(AT)8			NHsB9_c9853_3_aL	(AT)8			NHsB9_c9853_3_aL	AT				NHsB9_c9853_3_a	NHsB9_c9853_3_aL	125
NHsB9_s778_1_aL	CAGTTTTCCCAGTCACGACTGCTTTGTGTTTTGAGGATGATGT	NHsB9_s778_1_aR	GTTTTTTGAGCTTGTCTTTGAGAGTTGG	(TGCT)4	(TGCT)4	TGCT	74	74	74-74	Monomorphic													Wc_3562_aL	CAGTTTTCCCAGTCACGACAGCAATACCTATGGAGTTGCAGGA		yam_NH_singleton_B310-33_9_s778_1_a	NHsB9_s778_1_aL	TGCT	4	16	(TGCT)	4	(TGCT)4			NHsB9_s778_1_aL	(TGCT)4			NHsB9_s778_1_aL	TGCT				NHsB9_s778_1_a	NHsB9_s778_1_aL	74
NHc_3210cL	CAGTTTTCCCAGTCACGACCTTCCACCCATATTTCTCTGAAGC	NHc_3210cR	GTTTGGGAGGACAAAGACAGTCTCAAAA	(TG)8	(TG)8	TG	161	165	161-165	Polymorphic													Wc_3577_aL	CAGTTTTCCCAGTCACGACGCACAAGCACCTAATCATTCATTTC		yam_NH_contig_3210_c	NHc_3210cL	TG	2	16	(TG)	8	(TG)8			NHc_3210cL	(TG)8			NHc_3210cL	TG				NHc_3210c	NHc_3210cL	161
NHc_451_bL	CAGTTTTCCCAGTCACGACCCAAACCGGTGGCTACTTCTAAAT	NHc_451_bR	GTTTTGATAGATCAAACACAAACAAACACAAA	(TGCA)4	(TGCA)4	TGCA	170	187	170-187	Polymorphic													Wc_3658_aL	CAGTTTTCCCAGTCACGACATGGAATTGGAACCAAGTTACGAG		yam_NH_contig_451_b	NHc_451_bL	TGCA	4	16	(TGCA)	4	(TGCA)4			NHc_451_bL	(TGCA)4			NHc_451_bL	TGCA				NHc_451_b	NHc_451_bL	170
NHs87_c5029cL	CAGTTTTCCCAGTCACGACTTCCTCACTGTCTTCATTCCCTTC	NHs87_c5029cR	GTTTCCACAACCAATTCCTCTTAAACAAG	(TTTA)4	(TTTA)4	TTTA	184	187	184-187	Polymorphic													Wc_3659_aL	CAGTTTTCCCAGTCACGACGTGCTCATTGTGCTAAAGTTCGTG		yam_NH_singleton_87-01091-33_1_c5029_c	NHs87_c5029cL	TTTA	4	16	(TTTA)	4	(TTTA)4			NHs87_c5029cL	(TTTA)4			NHs87_c5029cL	TTTA				NHs87_c5029c	NHs87_c5029cL	184
NHc_1085_aL	CAGTTTTCCCAGTCACGACCCTTTCTCTTCTGATGCTTCCCTT	NHc_1085_aR	GTTTGAGAGAGGAGGTGAAAACATGTACAAA	(GAT)5	(GAT)5	GAT	184	187	184-187	Polymorphic													Wc_368_aL	CAGTTTTCCCAGTCACGACGATATGAGAAAGCAGCTCAAGGGA		yam_NH_contig_1085_a	NHc_1085_aL	GAT	3	15	(GAT)	5	(GAT)5			NHc_1085_aL	(GAT)5			NHc_1085_aL	GAT				NHc_1085_a	NHc_1085_aL	184
NHc_120_aL	CAGTTTTCCCAGTCACGACTCTCATGTGATCTTCCTCCATCAA	NHc_120_aR	GTTTCAATCATCTGCATTGCTTTGAAAC	(GCT)5	(GCT)5	GCT	66	66	66-66	Monomorphic													Wc_3744_aL	CAGTTTTCCCAGTCACGACAACTCCCACAAAACACCATCAAGT		yam_NH_contig_120_a	NHc_120_aL	GCT	3	15	(GCT)	5	(GCT)5			NHc_120_aL	(GCT)5			NHc_120_aL	GCT				NHc_120_a	NHc_120_aL	66
NHc_2273_aL	CAGTTTTCCCAGTCACGACAGGAAGTGATCGGTACAATCGAGA	NHc_2273_aR	GTTTCTTGAAAGAAAGTCGCATACCTGG	(GGC)5	(GGC)5	GGC	160	162	160-162	Polymorphic													Wc_3783_aL	CAGTTTTCCCAGTCACGACCATTCATCTTCTCCGAATGGTAGC		yam_NH_contig_2273_a	NHc_2273_aL	GGC	3	15	(GGC)	5	(GGC)5			NHc_2273_aL	(GGC)5			NHc_2273_aL	GGC				NHc_2273_a	NHc_2273_aL	160
NHc_4075_aL	CAGTTTTCCCAGTCACGACTCCCGGGATAGAGGTTATTAAGGA	NHc_4075_aR	GTTTGATGGAGAGCTGCGACATACG	(GGA)5	(GGA)5	GGA	162	164	162-164	Polymorphic													Wc_3797_aL	CAGTTTTCCCAGTCACGACCAAAGATTGCTGCCTTCTGGTTAT		yam_NH_contig_4075_a	NHc_4075_aL	GGA	3	15	(GGA)	5	(GGA)5			NHc_4075_aL	(GGA)5			NHc_4075_aL	GGA				NHc_4075_a	NHc_4075_aL	162
NHc_504_aL	CAGTTTTCCCAGTCACGACTGTCAAATTCAGCAACATCAACAG	NHc_504_aR	GTTTTGATGCTTTTGAGAATGAAAATGAA	(TAG)5	(TAG)5	TAG	156	156	156-156	Monomorphic													Wc_1721_aR	GTTTCTCGGAGGAGAAGAAAGAGGAGTC		yam_NH_contig_504_a	NHc_504_aL	TAG	3	15	(TAG)	5	(TAG)5			NHc_504_aL	(TAG)5			NHc_504_aL	TAG				NHc_504_a	NHc_504_aL	156
NHc_5633_aL	CAGTTTTCCCAGTCACGACCACCTCCTCATTCACCGAACTAAC	NHc_5633_aR	GTTTAAGGAGAAGGTTGAGGAGAAGCTG	(TCC)5	(TCC)5	TCC	124	124	124-124	Monomorphic													Wc_1746_aR	GTTTCCCGGTTGTTGTTCATCATATCTT		yam_NH_contig_5633_a	NHc_5633_aL	TCC	3	15	(TCC)	5	(TCC)5			NHc_5633_aL	(TCC)5			NHc_5633_aL	TCC				NHc_5633_a	NHc_5633_aL	124
NHc_6025_aL	CAGTTTTCCCAGTCACGACCTATGAAGAAGGTGAGGAAGGCTG	NHc_6025_aR	GTTTATGGTACTTGTTCCTTGCTCTTGC	(TGC)5	(TGC)5	TGC	124	124	124-124	Monomorphic													Wc_1748_aR	GTTTGATTTTCCGACTGAAGGAAAGACA		yam_NH_contig_6025_a	NHc_6025_aL	TGC	3	15	(TGC)	5	(TGC)5			NHc_6025_aL	(TGC)5			NHc_6025_aL	TGC				NHc_6025_a	NHc_6025_aL	124
NHc_6117_aL	CAGTTTTCCCAGTCACGACATCAAAACCCGCCGGTGATA	NHc_6117_aR	GTTTAGGAAGAGGAAGAGAAAGAAGGCG	(TCA)5	(TCA)5	TCA	123	123	123-123	Monomorphic													Wc_1789_aR	GTTTGACAGAAATTGTCCCTGAATCCAC		yam_NH_contig_6117_a	NHc_6117_aL	TCA	3	15	(TCA)	5	(TCA)5			NHc_6117_aL	(TCA)5			NHc_6117_aL	TCA				NHc_6117_a	NHc_6117_aL	123
NHc_6145_aL	CAGTTTTCCCAGTCACGACTTGCTACTGATGATGTTGTTGGTG	NHc_6145_aR	GTTTTAACTGCAAAAACGCTGCAATATC	(TGG)5	(TGG)5	TGG	162	162	162-162	Monomorphic													Wc_1831_bR	GTTTGTAGGCCTCCAATGTCTCTCCTTT		yam_NH_contig_6145_a	NHc_6145_aL	TGG	3	15	(TGG)	5	(TGG)5			NHc_6145_aL	(TGG)5			NHc_6145_aL	TGG				NHc_6145_a	NHc_6145_aL	162
NHc_6237_aL	CAGTTTTCCCAGTCACGACTGCTACTTCGCTTCTCGTCTTCTT	NHc_6237_aR	GTTTTCAGGAAGGCGATAATAAACCTGA	(TGC)5	(TGC)5	TGC	182	182	182-182	Monomorphic													Wc_1915_aR	GTTTTCTCGACATCAAAGATGGAGACTG		yam_NH_contig_6237_a	NHc_6237_aL	TGC	3	15	(TGC)	5	(TGC)5			NHc_6237_aL	(TGC)5			NHc_6237_aL	TGC				NHc_6237_a	NHc_6237_aL	182
NHc_6296_aL	CAGTTTTCCCAGTCACGACAGAGTTGTCAGGTCATTTTCCTCG	NHc_6296_aR	GTTTGTTATTTACAATCCTCCCCCTTGC	(GTT)5	(GTT)5	GTT	160	160	160-160	Monomorphic													Wc_1948_aR	GTTTTGGATTCAGTGGAGGTCTTGATTT		yam_NH_contig_6296_a	NHc_6296_aL	GTT	3	15	(GTT)	5	(GTT)5			NHc_6296_aL	(GTT)5			NHc_6296_aL	GTT				NHc_6296_a	NHc_6296_aL	160
NHc_6686_aL	CAGTTTTCCCAGTCACGACCTCCAGCACTCTCCCTGTACAAAT	NHc_6686_aR	GTTTTTGGCAGCATGAGATTTCAGTAAA	(CAT)5	(CAT)5	CAT	181	186	181-186	Polymorphic													Wc_1981_aR	GTTTTGAGTAGGGGAGATGGTGTAGGAC		yam_NH_contig_6686_a	NHc_6686_aL	CAT	3	15	(CAT)	5	(CAT)5			NHc_6686_aL	(CAT)5			NHc_6686_aL	CAT				NHc_6686_a	NHc_6686_aL	181
NHc_6868_aL	CAGTTTTCCCAGTCACGACTATTTATTCGGCATTCTTTGGGTG	NHc_6868_aR	GTTTCATATCTAGTCTCCGCGAACAACC	(GAA)5	(GAA)5	GAA	112	112	112-112	Monomorphic													Wc_1982_aR	GTTTTCTCAGCTCCATTCACAAGTTCAC		yam_NH_contig_6868_a	NHc_6868_aL	GAA	3	15	(GAA)	5	(GAA)5			NHc_6868_aL	(GAA)5			NHc_6868_aL	GAA				NHc_6868_a	NHc_6868_aL	112
NHs87_c10016_aL	CAGTTTTCCCAGTCACGACGAGTTCAGTCCTGTTAGTTACAACTGC	NHs87_c10016_aR	GTTTACTACTCTGAAGCTCTCGCTTCCT	(CAA)5	(CAA)5	CAA	174	177	174-177	Polymorphic													Wc_2033_aR	GTTTCCACAGCATTGATAAGTTGCTGAA		yam_NH_singleton_87-01091-33_1_c10016_a	NHs87_c10016_aL	CAA	3	15	(CAA)	5	(CAA)5			NHs87_c10016_aL	(CAA)5			NHs87_c10016_aL	CAA				NHs87_c10016_a	NHs87_c10016_aL	174
NHs87_c10831_aL	CAGTTTTCCCAGTCACGACACATGATGGACGTGTGTAGGAATG	NHs87_c10831_aR	GTTTTCAATAAAACAAGAGCTCACCGGA	(TGG)5	(TGG)5	TGG	113	161	113-161	Polymorphic													Wc_2142_aR	GTTTTGCATGCCATTCATAAGACCAG		yam_NH_singleton_87-01091-33_1_c10831_a	NHs87_c10831_aL	TGG	3	15	(TGG)	5	(TGG)5			NHs87_c10831_aL	(TGG)5			NHs87_c10831_aL	TGG				NHs87_c10831_a	NHs87_c10831_aL	113
NHs87_c10893_aL	CAGTTTTCCCAGTCACGACGGATCGACGACGAATCGAAG	NHs87_c10893_aR	GTTTATGGGTTGAAGGTGTTGTTGTAGC	(CTC)5	(CTC)5	CTC	145	145	145-145	Monomorphic													Wc_2228_aR	GTTTCACAATAGCATGGGAAAGACCATT		yam_NH_singleton_87-01091-33_1_c10893_a	NHs87_c10893_aL	CTC	3	15	(CTC)	5	(CTC)5			NHs87_c10893_aL	(CTC)5			NHs87_c10893_aL	CTC				NHs87_c10893_a	NHs87_c10893_aL	145
NHs87_c11241_aL	CAGTTTTCCCAGTCACGACCTACGATGAGTTCCTCGAGACCC	NHs87_c11241_aR	GTTTCTCTCTTCTTCGTCTTCAACGACC	(GCG)5	(GCG)5	GCG	154	154	154-154	Monomorphic													Wc_2318_aR	GTTTGAACAAGTCCACCATCAGAGAGGT		yam_NH_singleton_87-01091-33_1_c11241_a	NHs87_c11241_aL	GCG	3	15	(GCG)	5	(GCG)5			NHs87_c11241_aL	(GCG)5			NHs87_c11241_aL	GCG				NHs87_c11241_a	NHs87_c11241_aL	154
NHs87_c3681_aL	CAGTTTTCCCAGTCACGACAGATGGAGATCTCACCGGAGGT	NHs87_c3681_aR	GTTTAAGGTACAAGATCTGGACCCCTTC	(GGC)5	(GGC)5	GGC	168	168	168-168	Monomorphic													Wc_2404_aR	GTTTATGGGAACTGCAAAGTAGAACTGC		yam_NH_singleton_87-01091-33_1_c3681_a	NHs87_c3681_aL	GGC	3	15	(GGC)	5	(GGC)5			NHs87_c3681_aL	(GGC)5			NHs87_c3681_aL	GGC				NHs87_c3681_a	NHs87_c3681_aL	168
NHs87_c7757_aL	CAGTTTTCCCAGTCACGACAAGCTTCGATCCCTCTTTCCAAT	NHs87_c7757_aR	GTTTGATTGAGGGTCGGAATCATCAC	(TCC)5	(TCC)5	TCC	144	148	144-148	Polymorphic													Wc_2432_aR	GTTTCCATTCTCCAACACCCTTCTTCT		yam_NH_singleton_87-01091-33_1_c7757_a	NHs87_c7757_aL	TCC	3	15	(TCC)	5	(TCC)5			NHs87_c7757_aL	(TCC)5			NHs87_c7757_aL	TCC				NHs87_c7757_a	NHs87_c7757_aL	144
NHs87_c8503_aL	CAGTTTTCCCAGTCACGACCACTTACGATCCTCTCGATTACGC	NHs87_c8503_aR	GTTTGAGGCGAGAAGAGAAGCTACGATA	(GCC)5	(GCC)5	GCC	139	142	139-142	Polymorphic													Wc_2443_bR	GTTTATAAAAGTGCAACAGCTCCTCCC		yam_NH_singleton_87-01091-33_1_c8503_a	NHs87_c8503_aL	GCC	3	15	(GCC)	5	(GCC)5			NHs87_c8503_aL	(GCC)5			NHs87_c8503_aL	GCC				NHs87_c8503_a	NHs87_c8503_aL	139
NHs87_c8985_aL	CAGTTTTCCCAGTCACGACGGCTCTTGTTGAAGGATTAGGGTT	NHs87_c8985_aR	GTTTGACTGGTAGGTTGGGAAACCTCTT	(GGC)5	(GGC)5	GGC	301	304	301-304	Polymorphic													Wc_2465_aR	GTTTAACTCATCACAGGGTTCCAATGAG		yam_NH_singleton_87-01091-33_1_c8985_a	NHs87_c8985_aL	GGC	3	15	(GGC)	5	(GGC)5			NHs87_c8985_aL	(GGC)5			NHs87_c8985_aL	GGC				NHs87_c8985_a	NHs87_c8985_aL	301
NHs87_lrc9008_aL	CAGTTTTCCCAGTCACGACCCTGTGAGTGCACACGTAGAGAGT	NHs87_lrc9008_aR	GTTTTCACAAGAGCTCTAATTGGCCTTC	(GTG)5	(GTG)5	GTG	192	192	192-192	Monomorphic													Wc_2495_aR	GTTTGGCATAGGACACCACTTGTTTGAT		yam_NH_singleton_87-01091-33_1_lrc9008_a	NHs87_lrc9008_aL	GTG	3	15	(GTG)	5	(GTG)5			NHs87_lrc9008_aL	(GTG)5			NHs87_lrc9008_aL	GTG				NHs87_lrc9008_a	NHs87_lrc9008_aL	192
NHs87_lrc9455_aL	CAGTTTTCCCAGTCACGACGTTTCTCATTTCGCTCCGAAGAA	NHs87_lrc9455_aR	GTTTAGGCACATTATTCACCATTATCGG	(GAA)5	(GAA)5	GAA	0	0	-	Didn't Work													Wc_2498_aR	GTTTAGCAGATAGATCAAGTTCAAACACAAAC		yam_NH_singleton_87-01091-33_1_lrc9455_a	NHs87_lrc9455_aL	GAA	3	15	(GAA)	5	(GAA)5			NHs87_lrc9455_aL	(GAA)5			NHs87_lrc9455_aL	GAA				NHs87_lrc9455_a	NHs87_lrc9455_aL
NHsA8_c10143_2_aL	CAGTTTTCCCAGTCACGACTGTTTCCACTAATATGGGAATGGG	NHsA8_c10143_2_aR	GTTTGCTTGAATGACACCAAGTTCTGG	(TAT)5	(TAT)5	TAT	103	103	103-103	Monomorphic													Wc_2574_aR	GTTTTGCAATCCTCATATGAACTTCCCT		yam_NH_singleton_A328-33_8_c10143_2_a	NHsA8_c10143_2_aL	TAT	3	15	(TAT)	5	(TAT)5			NHsA8_c10143_2_aL	(TAT)5			NHsA8_c10143_2_aL	TAT				NHsA8_c10143_2_a	NHsA8_c10143_2_aL	103
NHsA8_c10398_2_aL	CAGTTTTCCCAGTCACGACCTCTCAATCCCATAACAAACAGCC	NHsA8_c10398_2_aR	GTTTTCTGGTGAAGTCCAGAGAAGGAGT	(AGC)5	(AGC)5	AGC	145	148	145-148	Polymorphic													Wc_2639_bR	GTTTCCCAGCCTTAACAAAAAGAGGTTT		yam_NH_singleton_A328-33_8_c10398_2_a	NHsA8_c10398_2_aL	AGC	3	15	(AGC)	5	(AGC)5			NHsA8_c10398_2_aL	(AGC)5			NHsA8_c10398_2_aL	AGC				NHsA8_c10398_2_a	NHsA8_c10398_2_aL	145
NHsA8_c10400_3_aL	CAGTTTTCCCAGTCACGACGGCTGCAGCTGAGTTAGGTTAAGA	NHsA8_c10400_3_aR	GTTTTCTCTGCTGGTTATGAATGGTTGA	(TCA)5	(TCA)5	TCA	131	141	131-141	Polymorphic													Wc_2657_aR	GTTTTCACCATCAATGTCAACAACAGTG		yam_NH_singleton_A328-33_8_c10400_3_a	NHsA8_c10400_3_aL	TCA	3	15	(TCA)	5	(TCA)5			NHsA8_c10400_3_aL	(TCA)5			NHsA8_c10400_3_aL	TCA				NHsA8_c10400_3_a	NHsA8_c10400_3_aL	131
NHsA8_c10833_2_aL	CAGTTTTCCCAGTCACGACGGATTGATTTGTCAACAATTCTCAAAA	NHsA8_c10833_2_aR	GTTTGATGGACGACGATGATATTGTGTG	(TTA)5	(TTA)5	TTA	172	172	172-172	Monomorphic													Wc_2732_aR	GTTTATCCGCTTCTCAATCACCTCC		yam_NH_singleton_A328-33_8_c10833_2_a	NHsA8_c10833_2_aL	TTA	3	15	(TTA)	5	(TTA)5			NHsA8_c10833_2_aL	(TTA)5			NHsA8_c10833_2_aL	TTA				NHsA8_c10833_2_a	NHsA8_c10833_2_aL	172
NHsA8_c11631_2_aL	CAGTTTTCCCAGTCACGACTGATCTCACCCAGAAACCCTAACT	NHsA8_c11631_2_aR	GTTTCTTGTTAAGAAGCCACACAAATTCA	(GAT)5	(GAT)5	GAT	117	117	117-117	Monomorphic													Wc_2749_aR	GTTTAGTACTCAGCGTCAGTGGACTTCA		yam_NH_singleton_A328-33_8_c11631_2_a	NHsA8_c11631_2_aL	GAT	3	15	(GAT)	5	(GAT)5			NHsA8_c11631_2_aL	(GAT)5			NHsA8_c11631_2_aL	GAT				NHsA8_c11631_2_a	NHsA8_c11631_2_aL	117
NHsA8_c12903_2_aL	CAGTTTTCCCAGTCACGACAGCAAGCCTAGGATCACTGACAAT	NHsA8_c12903_2_aR	GTTTTGTTATCCATGGAAGTCTTAGCCA	(GCA)5	(GCA)5	GCA	101	101	101-101	Monomorphic													Wc_3037_aR	GTTTCGAATTTCAACCTGCTTTTCTTTG		yam_NH_singleton_A328-33_8_c12903_2_a	NHsA8_c12903_2_aL	GCA	3	15	(GCA)	5	(GCA)5			NHsA8_c12903_2_aL	(GCA)5			NHsA8_c12903_2_aL	GCA				NHsA8_c12903_2_a	NHsA8_c12903_2_aL	101
NHsA8_c13825_2_aL	CAGTTTTCCCAGTCACGACCCACAAGTAGTTGATCAGACCGTG	NHsA8_c13825_2_aR	GTTTCTTTTGCTCTGATTCCTCCTCAAG	(TAA)5	(TAA)5	TAA	139	139	139-139	Monomorphic													Wc_3057_aR	GTTTGGAGATCCATTAATTGTCGAACCA		yam_NH_singleton_A328-33_8_c13825_2_a	NHsA8_c13825_2_aL	TAA	3	15	(TAA)	5	(TAA)5			NHsA8_c13825_2_aL	(TAA)5			NHsA8_c13825_2_aL	TAA				NHsA8_c13825_2_a	NHsA8_c13825_2_aL	139
NHsA8_c13943_2_aL	CAGTTTTCCCAGTCACGACTAAGGACACCATTTCTGACTGTGC	NHsA8_c13943_2_aR	GTTTAAACAACAGCAGCAGGTTACAGGT	(GAT)5	(GAT)5	GAT	184	184	184-184	Monomorphic													Wc_3062_aR	GTTTTATTCACAAACTCAGCGCTTGAAC		yam_NH_singleton_A328-33_8_c13943_2_a	NHsA8_c13943_2_aL	GAT	3	15	(GAT)	5	(GAT)5			NHsA8_c13943_2_aL	(GAT)5			NHsA8_c13943_2_aL	GAT				NHsA8_c13943_2_a	NHsA8_c13943_2_aL	184
NHsA8_c2056_3_aL	CAGTTTTCCCAGTCACGACGGACACATTCTCAACCAAAGAACC	NHsA8_c2056_3_aR	GTTTATCTGCAGCAAAGTGAACAAACAA	(CCT)5	(CCT)5	CCT	158	173	158-173	Polymorphic													Wc_3092_aR	GTTTAGGATATCACGGCTAACCACCTC		yam_NH_singleton_A328-33_8_c2056_3_a	NHsA8_c2056_3_aL	CCT	3	15	(CCT)	5	(CCT)5			NHsA8_c2056_3_aL	(CCT)5			NHsA8_c2056_3_aL	CCT				NHsA8_c2056_3_a	NHsA8_c2056_3_aL	158
NHsA8_c5868_4_aL	CAGTTTTCCCAGTCACGACTCAGATCGTGGTGAAAAGATCGTA	NHsA8_c5868_4_aR	GTTTAGATCACAAATCCCCATCAGAAAA	(CTT)5	(CTT)5	CTT	108	108	108-108	Monomorphic													Wc_3126_aR	GTTTAAAATAACAACTTTTTCTGCCGGG		yam_NH_singleton_A328-33_8_c5868_4_a	NHsA8_c5868_4_aL	CTT	3	15	(CTT)	5	(CTT)5			NHsA8_c5868_4_aL	(CTT)5			NHsA8_c5868_4_aL	CTT				NHsA8_c5868_4_a	NHsA8_c5868_4_aL	108
NHsA8_c6203_7_aL	CAGTTTTCCCAGTCACGACAAAGCAGTGATCTTGCAGGACTGT	NHsA8_c6203_7_aR	GTTTAGGCACAAACCATGTCCAAATATC	(ATC)5	(ATC)5	ATC	156	156	156-156	Monomorphic													Wc_32_aR	GTTTCCGTTTTCCAGGTTATTATTGGC		yam_NH_singleton_A328-33_8_c6203_7_a	NHsA8_c6203_7_aL	ATC	3	15	(ATC)	5	(ATC)5			NHsA8_c6203_7_aL	(ATC)5			NHsA8_c6203_7_aL	ATC				NHsA8_c6203_7_a	NHsA8_c6203_7_aL	156
NHsA8_c6820_3_aL	CAGTTTTCCCAGTCACGACAAGTAGCGTTGAAAGGGGCAG	NHsA8_c6820_3_aR	GTTTACTGCCAACTTCTAGGAGAGGTGA	(GCT)5	(GCT)5	GCT	102	108	102-108	Polymorphic													Wc_3230_aR	GTTTATAACAAGCAAAAGGCAGCTCATC		yam_NH_singleton_A328-33_8_c6820_3_a	NHsA8_c6820_3_aL	GCT	3	15	(GCT)	5	(GCT)5			NHsA8_c6820_3_aL	(GCT)5			NHsA8_c6820_3_aL	GCT				NHsA8_c6820_3_a	NHsA8_c6820_3_aL	102
NHsA8_c7687_4_aL	CAGTTTTCCCAGTCACGACACTCTTCCCTTTCTCATGATGTGC	NHsA8_c7687_4_aR	GTTTATTCTCCCTTCCAAATTTCAAACC	(AGA)5	(AGA)5	AGA	168	168	168-168	Monomorphic													Wc_3253_bR	GTTTATTTCTTTGCAGGTTTAGCCCATT		yam_NH_singleton_A328-33_8_c7687_4_a	NHsA8_c7687_4_aL	AGA	3	15	(AGA)	5	(AGA)5			NHsA8_c7687_4_aL	(AGA)5			NHsA8_c7687_4_aL	AGA				NHsA8_c7687_4_a	NHsA8_c7687_4_aL	168
NHsA8_c9247_2_aL	CAGTTTTCCCAGTCACGACGACTTCTATGCTTGCCATTGATGA	NHsA8_c9247_2_aR	GTTTCCTCACACAAACGTCGAATTTACA	(ACC)5	(ACC)5	ACC	178	178	178-178	Monomorphic													Wc_3263_aR	GTTTCAAGCTGGCAATTATGGAGAGAAG		yam_NH_singleton_A328-33_8_c9247_2_a	NHsA8_c9247_2_aL	ACC	3	15	(ACC)	5	(ACC)5			NHsA8_c9247_2_aL	(ACC)5			NHsA8_c9247_2_aL	ACC				NHsA8_c9247_2_a	NHsA8_c9247_2_aL	178
NHsA8_c9425_2_aL	CAGTTTTCCCAGTCACGACGAAAACAAAGAGAAATCGCGAGG	NHsA8_c9425_2_aR	GTTTCTTCTTTCCAAGGTCTTCCAGCTT	(AAC)5	(AAC)5	AAC	180	180	180-180	Monomorphic													Wc_3295_aR	GTTTCTGGGTCAACCAACATTTCTAACC		yam_NH_singleton_A328-33_8_c9425_2_a	NHsA8_c9425_2_aL	AAC	3	15	(AAC)	5	(AAC)5			NHsA8_c9425_2_aL	(AAC)5			NHsA8_c9425_2_aL	AAC				NHsA8_c9425_2_a	NHsA8_c9425_2_aL	180
NHsB9_c10434_2_aL	CAGTTTTCCCAGTCACGACTGAGAGGTGAGCTAGCTTTCCAGA	NHsB9_c10434_2_aR	GTTTGCAACAACCAAATCCAAAAGTGTT	(GGT)5	(GGT)5	GGT	145	145	145-145	Monomorphic													Wc_3308_aR	GTTTTCCTACAAAGGAAGGGAATGATGA		yam_NH_singleton_B310-33_9_c10434_2_a	NHsB9_c10434_2_aL	GGT	3	15	(GGT)	5	(GGT)5			NHsB9_c10434_2_aL	(GGT)5			NHsB9_c10434_2_aL	GGT				NHsB9_c10434_2_a	NHsB9_c10434_2_aL	145
NHsB9_c10590_2_aL	CAGTTTTCCCAGTCACGACAAAGGACATCTTAATAAATTTTTCTCCA	NHsB9_c10590_2_aR	GTTTTATTTTCACGGTTCTTGGACATTT	(ATT)5	(ATT)5	ATT	159	164	159-164	Polymorphic													Wc_3386_aR	GTTTCCCTTGACTACTGAGGCATCATCT		yam_NH_singleton_B310-33_9_c10590_2_a	NHsB9_c10590_2_aL	ATT	3	15	(ATT)	5	(ATT)5			NHsB9_c10590_2_aL	(ATT)5			NHsB9_c10590_2_aL	ATT				NHsB9_c10590_2_a	NHsB9_c10590_2_aL	159
NHsB9_c11360_2_aL	CAGTTTTCCCAGTCACGACAGAGAGCAAAGAGGCATTGGG	NHsB9_c11360_2_aR	GTTTGAAGTTGCCATCCTCCTGAGTTC	(AAG)5	(AAG)5	AAG	107	107	107-107	Monomorphic													Wc_3434_aR	GTTTCTCCTTCAATCCCAACCCTTTC		yam_NH_singleton_B310-33_9_c11360_2_a	NHsB9_c11360_2_aL	AAG	3	15	(AAG)	5	(AAG)5			NHsB9_c11360_2_aL	(AAG)5			NHsB9_c11360_2_aL	AAG				NHsB9_c11360_2_a	NHsB9_c11360_2_aL	107
NHsB9_c11441_2_aL	CAGTTTTCCCAGTCACGACCTCAGTGTTGCTGAAGATGACGAT	NHsB9_c11441_2_aR	GTTTACCTACAGAGTTAAGCCTTGACCG	(GAT)5	(GAT)5	GAT	109	109	109-109	Monomorphic													Wc_3492_aR	GTTTCTACTGGTCATGATCCAAGGTGGT		yam_NH_singleton_B310-33_9_c11441_2_a	NHsB9_c11441_2_aL	GAT	3	15	(GAT)	5	(GAT)5			NHsB9_c11441_2_aL	(GAT)5			NHsB9_c11441_2_aL	GAT				NHsB9_c11441_2_a	NHsB9_c11441_2_aL	109
NHsB9_c12237_2_aL	CAGTTTTCCCAGTCACGACTGCTTCTTCTTTGAATTTCCCAGT	NHsB9_c12237_2_aR	GTTTTCCATGGTTGACTCTCTAGGCTTC	(AAT)5	(AAT)5	AAT	164	167	164-167	Polymorphic													Wc_3505_aR	GTTTGTTGCTGAAAGAGAACCCAAACAT		yam_NH_singleton_B310-33_9_c12237_2_a	NHsB9_c12237_2_aL	AAT	3	15	(AAT)	5	(AAT)5			NHsB9_c12237_2_aL	(AAT)5			NHsB9_c12237_2_aL	AAT				NHsB9_c12237_2_a	NHsB9_c12237_2_aL	164
NHsB9_c12559_2_aL	CAGTTTTCCCAGTCACGACAATCGCAAAGACAACCCATATTGT	NHsB9_c12559_2_aR	GTTTATGGCTTTGCATTAGAGGACTTGT	(CAT)5	(CAT)5	CAT	132	132	132-132	Monomorphic													Wc_3561_aR	GTTTGCCTGAATGATGTGCAGTATCTGT		yam_NH_singleton_B310-33_9_c12559_2_a	NHsB9_c12559_2_aL	CAT	3	15	(CAT)	5	(CAT)5			NHsB9_c12559_2_aL	(CAT)5			NHsB9_c12559_2_aL	CAT				NHsB9_c12559_2_a	NHsB9_c12559_2_aL	132
NHsB9_c13181_2_aL	CAGTTTTCCCAGTCACGACAAAAATGAACCTTATTGCAGGGGT	NHsB9_c13181_2_aR	GTTTTGCACTTTCATACCCCATTTATCC	(ATT)5	(ATT)5	ATT	121	121	121-121	Monomorphic													Wc_3562_aR	GTTTGAAGTCTTCCGTTTCATCTGCATT		yam_NH_singleton_B310-33_9_c13181_2_a	NHsB9_c13181_2_aL	ATT	3	15	(ATT)	5	(ATT)5			NHsB9_c13181_2_aL	(ATT)5			NHsB9_c13181_2_aL	ATT				NHsB9_c13181_2_a	NHsB9_c13181_2_aL	121
NHsB9_c4927_7_aL	CAGTTTTCCCAGTCACGACTCCATTTACAGCATAACAGCAGGA	NHsB9_c4927_7_aR	GTTTCCTGCTTATTCATTGTGTTGGTAGC	(ACA)5	(ACA)5	ACA	69	180	69-180	Polymorphic													Wc_3577_aR	GTTTGTACCTAGCACCGGATTGTGTCTC		yam_NH_singleton_B310-33_9_c4927_7_a	NHsB9_c4927_7_aL	ACA	3	15	(ACA)	5	(ACA)5			NHsB9_c4927_7_aL	(ACA)5			NHsB9_c4927_7_aL	ACA				NHsB9_c4927_7_a	NHsB9_c4927_7_aL	69
NHsB9_c9791_4_dL	CAGTTTTCCCAGTCACGACCTATCCCTCTTCTCTCCCCTCTTG	NHsB9_c9791_4_dR	GTTTCTCTTTGCCTCAGCTCTTGATGAT	(CTC)5	(CTC)5	CTC	153	153	153-153	Monomorphic													Wc_3658_aR	GTTTTATCGCTGATGAGCGGAATAATAG		yam_NH_singleton_B310-33_9_c9791_4_d	NHsB9_c9791_4_dL	CTC	3	15	(CTC)	5	(CTC)5			NHsB9_c9791_4_dL	(CTC)5			NHsB9_c9791_4_dL	CTC				NHsB9_c9791_4_d	NHsB9_c9791_4_dL	153
NHc_4071_bL	CAGTTTTCCCAGTCACGACAATTAAAATTGAAGGTAGACTAGGAGCA	NHc_4071_bR	GTTTATACCCATCCTACGGTCCTTATTC	(AGG)5	(AGG)5	AGG	173	173	173-173	Monomorphic													Wc_3659_aR	GTTTATGAGCTTTCAATTAGACCTGCCA		yam_NH_contig_4071_b	NHc_4071_bL	AGG	3	15	(AGG)	5	(AGG)5			NHc_4071_bL	(AGG)5			NHc_4071_bL	AGG				NHc_4071_b	NHc_4071_bL	173
NHc_941_aL	CAGTTTTCCCAGTCACGACAACTCTCCGAGCTTGAGTTTTTCA	NHc_941_aR	GTTTTTGTTCATTGATGAAGCTCTTTCTTG	(AAG)5	(AAG)5	AAG	149	155	149-155	Polymorphic													Wc_368_aR	GTTTCTCATTCCCCGGAAGTAGAAGC		yam_NH_contig_941_a	NHc_941_aL	AAG	3	15	(AAG)	5	(AAG)5			NHc_941_aL	(AAG)5			NHc_941_aL	AAG				NHc_941_a	NHc_941_aL	149
NHs87_c5029_aL	CAGTTTTCCCAGTCACGACTTCCAGTCCTAGTCCTCCTAACCC	NHs87_c5029_aR	GTTTGAAGGGAATGAAGACAGTGAGGAA	(CCG)5	(CCG)5	CCG	182	182	182-182	Monomorphic													Wc_3744_aR	GTTTAATAACACTCCCATCCTCCAACTG		yam_NH_singleton_87-01091-33_1_c5029_a	NHs87_c5029_aL	CCG	3	15	(CCG)	5	(CCG)5			NHs87_c5029_aL	(CCG)5			NHs87_c5029_aL	CCG				NHs87_c5029_a	NHs87_c5029_aL	182
NHsA8_c13489_2_aL	CAGTTTTCCCAGTCACGACGGTGGACATGGCACTGGTTTA	NHsA8_c13489_2_aR	GTTTCTCCACCACCACCTACACCATC	(GGT)5	(GGT)5	GGT	77	112	77-112	Polymorphic													Wc_3783_aR	GTTTGAGAGCATCACCATCTCTGCTGT		yam_NH_singleton_A328-33_8_c13489_2_a	NHsA8_c13489_2_aL	GGT	3	15	(GGT)	5	(GGT)5			NHsA8_c13489_2_aL	(GGT)5			NHsA8_c13489_2_aL	GGT				NHsA8_c13489_2_a	NHsA8_c13489_2_aL	77
NHc_127cL	CAGTTTTCCCAGTCACGACGTGGTTATGGTGTTGGCTATGGT	NHc_127cR	GTTTCAAGTAGAATGAAGACCTCAAACATCA	(TA)7	(TA)7	TA	254	254	254-254	Monomorphic													Wc_3797_aR	GTTTTTCTTTGTATGCCCACCAAATCTT		yam_NH_contig_127_c	NHc_127cL	TA	2	14	(TA)	7	(TA)7			NHc_127cL	(TA)7			NHc_127cL	TA				NHc_127c	NHc_127cL	254
NHc_131_bL	CAGTTTTCCCAGTCACGACTGTTAATTGTTTCATGCCCATCAT	NHc_131_bR	GTTTCAGTAATGCTAAACACAAGAAGGTAAGG	(TA)7	(TA)7	TA	128	128	128-128	Monomorphic																yam_NH_contig_131_b	NHc_131_bL	TA	2	14	(TA)	7	(TA)7			NHc_131_bL	(TA)7			NHc_131_bL	TA				NHc_131_b	NHc_131_bL	128
NHc_3405_aL	CAGTTTTCCCAGTCACGACCCATTTTTGTAGCTTGGTCAGAAC	NHc_3405_aR	GTTTCAGTAATTTCAATTGAGCAACACTTACT	(TA)7	(TA)7	TA	159	161	159-161	Polymorphic													Wc_3855_aL	CAGTTTTCCCAGTCACGACGAGCTCATTCTCAATGGGTTCATC		yam_NH_contig_3405_a	NHc_3405_aL	TA	2	14	(TA)	7	(TA)7			NHc_3405_aL	(TA)7			NHc_3405_aL	TA				NHc_3405_a	NHc_3405_aL	159
NHc_5174_aL	CAGTTTTCCCAGTCACGACGCCTCTCACTAACACATTCATCCA	NHc_5174_aR	GTTTCAGACATCAAACAATCAGCAACAA	(AC)7	(AC)7	AC	151	159	151-159	Polymorphic													Wc_3893_aL	CAGTTTTCCCAGTCACGACATCAATTCGTATCCCGTTCAGGTT		yam_NH_contig_5174_a	NHc_5174_aL	AC	2	14	(AC)	7	(AC)7			NHc_5174_aL	(AC)7			NHc_5174_aL	AC				NHc_5174_a	NHc_5174_aL	151
NHc_5324_aL	CAGTTTTCCCAGTCACGACTTGGAAAGAAACCACTACAAAGCC	NHc_5324_aR	GTTTTATACAGTTTCAGCCCCTTCTTGC	(TA)7	(TA)7	TA	161	164	161-164	Polymorphic													Wc_3943_aL	CAGTTTTCCCAGTCACGACCCTTGTGAGAAACCCATGATCG		yam_NH_contig_5324_a	NHc_5324_aL	TA	2	14	(TA)	7	(TA)7			NHc_5324_aL	(TA)7			NHc_5324_aL	TA				NHc_5324_a	NHc_5324_aL	161
NHc_5914_aL	CAGTTTTCCCAGTCACGACAGTGATGGAAGGGTAATTCGGTAA	NHc_5914_aR	GTTTAATTCAGAAGGACTTTTTGGTGAAA	(TA)7	(TA)7	TA	165	165	165-165	Monomorphic													Wc_403_aL	CAGTTTTCCCAGTCACGACACCACTAGCACTGAAAGGCTTGAG		yam_NH_contig_5914_a	NHc_5914_aL	TA	2	14	(TA)	7	(TA)7			NHc_5914_aL	(TA)7			NHc_5914_aL	TA				NHc_5914_a	NHc_5914_aL	165
NHc_7134_aL	CAGTTTTCCCAGTCACGACAACACAACAAAGGATTTCCACACA	NHc_7134_aR	GTTTTGCCATATAAGATGCTTGAAACTCA	(AT)7	(AT)7	AT	124	128	124-128	Polymorphic													Wc_4176_aL	CAGTTTTCCCAGTCACGACGAGCCAGAGATAGCTTGAGTTTGG		yam_NH_contig_7134_a	NHc_7134_aL	AT	2	14	(AT)	7	(AT)7			NHc_7134_aL	(AT)7			NHc_7134_aL	AT				NHc_7134_a	NHc_7134_aL	124
NHs87_c5013_aL	CAGTTTTCCCAGTCACGACTTTTCTTGGAATCTATGAGCAGGC	NHs87_c5013_aR	GTTTTCCAATTTTCAATGGCAATAATCA	(AC)7	(AC)7	AC	179	179	179-179	Monomorphic													Wc_4215_aL	CAGTTTTCCCAGTCACGACCTCGCCCATATTGTAACCTCTCAC		yam_NH_singleton_87-01091-33_1_c5013_a	NHs87_c5013_aL	AC	2	14	(AC)	7	(AC)7			NHs87_c5013_aL	(AC)7			NHs87_c5013_aL	AC				NHs87_c5013_a	NHs87_c5013_aL	179
NHs87_lrc10359_aL	CAGTTTTCCCAGTCACGACATTGCGCTACTAGTCTCCACTTCG	NHs87_lrc10359_aR	GTTTATTAAGCAAGATGACAGCCTTGGA	(TC)7	(TC)7	TC	73	147	73-147	Polymorphic													Wc_423_aL	CAGTTTTCCCAGTCACGACATGGGCTCATCCGTTCCTAACTAT		yam_NH_singleton_87-01091-33_1_lrc10359_a	NHs87_lrc10359_aL	TC	2	14	(TC)	7	(TC)7			NHs87_lrc10359_aL	(TC)7			NHs87_lrc10359_aL	TC				NHs87_lrc10359_a	NHs87_lrc10359_aL	73
NHsA8_c10566_2_aL	CAGTTTTCCCAGTCACGACAAGGAAATGAAGGTGGTGGATATG	NHsA8_c10566_2_aR	GTTTGACCAAACCTATGTATTCACTTACTTGG	(TA)7	(TA)7	TA	143	157	143-157	Polymorphic													Wc_4308_aL	CAGTTTTCCCAGTCACGACTATTGAGGATGCAATGTAGAGCCA		yam_NH_singleton_A328-33_8_c10566_2_a	NHsA8_c10566_2_aL	TA	2	14	(TA)	7	(TA)7			NHsA8_c10566_2_aL	(TA)7			NHsA8_c10566_2_aL	TA				NHsA8_c10566_2_a	NHsA8_c10566_2_aL	143
NHsA8_c10588_2_aL	CAGTTTTCCCAGTCACGACGGCTAATGGTCATTGCTGCTTTAT	NHsA8_c10588_2_aR	GTTTATGGAAAGGAGATTCCTTGGTTGT	(AT)7	(AT)7	AT	171	171	171-171	Monomorphic													Wc_4334_aL	CAGTTTTCCCAGTCACGACGCTTGTCAAAAGCCACATGAAGTA		yam_NH_singleton_A328-33_8_c10588_2_a	NHsA8_c10588_2_aL	AT	2	14	(AT)	7	(AT)7			NHsA8_c10588_2_aL	(AT)7			NHsA8_c10588_2_aL	AT				NHsA8_c10588_2_a	NHsA8_c10588_2_aL	171
NHsA8_c12137_4_aL	CAGTTTTCCCAGTCACGACACGTTACAAGAGAAGTGAGGACGC	NHsA8_c12137_4_aR	GTTTTTCTTCAACATTATCATTGGCAGC	(TA)7	(TA)7	TA	64	64	64-64	Monomorphic													Wc_4336_aL	CAGTTTTCCCAGTCACGACCAAAAAGAGCAAAAACACAAACCA		yam_NH_singleton_A328-33_8_c12137_4_a	NHsA8_c12137_4_aL	TA	2	14	(TA)	7	(TA)7			NHsA8_c12137_4_aL	(TA)7			NHsA8_c12137_4_aL	TA				NHsA8_c12137_4_a	NHsA8_c12137_4_aL	64
NHsA8_c12375_2_aL	CAGTTTTCCCAGTCACGACCTTCGCTGAAGCAAAACCCC	NHsA8_c12375_2_aR	GTTTTCTCCATCCTTCTATACATCCCCC	(CT)7	(CT)7	CT	133	144	133-144	Polymorphic													Wc_4372_aL	CAGTTTTCCCAGTCACGACCAGTGAAAGCCAAGAGAAGCAAG		yam_NH_singleton_A328-33_8_c12375_2_a	NHsA8_c12375_2_aL	CT	2	14	(CT)	7	(CT)7			NHsA8_c12375_2_aL	(CT)7			NHsA8_c12375_2_aL	CT				NHsA8_c12375_2_a	NHsA8_c12375_2_aL	133
NHsA8_c14455_2_aL	CAGTTTTCCCAGTCACGACTGCATTGTAGTCATTAAACTCCTGC	NHsA8_c14455_2_aR	GTTTAGCTGGATGAACAACACCAATCTA	(AG)7	(AG)7	AG	133	138	133-138	Polymorphic													NHc_4177_aL	CAGTTTTCCCAGTCACGACGTGTCCTTGTACCAGTTCGCTTAC		yam_NH_singleton_A328-33_8_c14455_2_a	NHsA8_c14455_2_aL	AG	2	14	(AG)	7	(AG)7			NHsA8_c14455_2_aL	(AG)7			NHsA8_c14455_2_aL	AG				NHsA8_c14455_2_a	NHsA8_c14455_2_aL	133
NHsA8_c4355_5_aL	CAGTTTTCCCAGTCACGACATCTTTTGGCCCATCAATACTCTG	NHsA8_c4355_5_aR	GTTTTAATTGATGATAAGTGCCGCCTTT	(AC)7	(AC)7	AC	175	179	175-179	Polymorphic													NHsB9_c13712_2_aL	CAGTTTTCCCAGTCACGACGATGATCTTGCATGCCTTCTTGT		yam_NH_singleton_A328-33_8_c4355_5_a	NHsA8_c4355_5_aL	AC	2	14	(AC)	7	(AC)7			NHsA8_c4355_5_aL	(AC)7			NHsA8_c4355_5_aL	AC				NHsA8_c4355_5_a	NHsA8_c4355_5_aL	175
NHsA8_c6374_5_aL	CAGTTTTCCCAGTCACGACGTGTGCCGTCTGTCTCACATTAAC	NHsA8_c6374_5_aR	GTTTTCCAAACCAAAATGAACAATACAAAA	(GT)7	(GT)7	GT	156	164	156-164	Polymorphic													NHc_1742_aL	CAGTTTTCCCAGTCACGACAAGTATTCCATCTCCTGAAAGGGG		yam_NH_singleton_A328-33_8_c6374_5_a	NHsA8_c6374_5_aL	GT	2	14	(GT)	7	(GT)7			NHsA8_c6374_5_aL	(GT)7			NHsA8_c6374_5_aL	GT				NHsA8_c6374_5_a	NHsA8_c6374_5_aL	156
NHsA8_c6591_5_aL	CAGTTTTCCCAGTCACGACGAGTCTGAGTGCCACGATTCAGTA	NHsA8_c6591_5_aR	GTTTAAGACTGTATTCTTTTGTCAACCCAAA	(TG)7	(TG)7	TG	141	146	141-146	Polymorphic													NHc_2230_aL	CAGTTTTCCCAGTCACGACATAATTTGCATGGCGAAAAGGAA		yam_NH_singleton_A328-33_8_c6591_5_a	NHsA8_c6591_5_aL	TG	2	14	(TG)	7	(TG)7			NHsA8_c6591_5_aL	(TG)7			NHsA8_c6591_5_aL	TG				NHsA8_c6591_5_a	NHsA8_c6591_5_aL	141
NHsA8_c8963_4_aL	CAGTTTTCCCAGTCACGACTTGGATGATGTTCGATTAATTCCC	NHsA8_c8963_4_aR	GTTTAACTAACTATTCACATGGCACCCG	(AT)7	(AT)7	AT	153	153	153-153	Monomorphic													NHsA8_c12418_2_aL	CAGTTTTCCCAGTCACGACATAGCCATCATCCATTGAGCTTAC		yam_NH_singleton_A328-33_8_c8963_4_a	NHsA8_c8963_4_aL	AT	2	14	(AT)	7	(AT)7			NHsA8_c8963_4_aL	(AT)7			NHsA8_c8963_4_aL	AT				NHsA8_c8963_4_a	NHsA8_c8963_4_aL	153
NHsA8_c9612_2_aL	CAGTTTTCCCAGTCACGACTGGTTAGCGAACAAAAGGAATTTG	NHsA8_c9612_2_aR	GTTTGCACTCACGGGTTCTTATTAATGC	(TA)7	(TA)7	TA	177	179	177-179	Polymorphic													NHc_7064_aL	CAGTTTTCCCAGTCACGACCAAGCCATTGCATTTGGAATTT		yam_NH_singleton_A328-33_8_c9612_2_a	NHsA8_c9612_2_aL	TA	2	14	(TA)	7	(TA)7			NHsA8_c9612_2_aL	(TA)7			NHsA8_c9612_2_aL	TA				NHsA8_c9612_2_a	NHsA8_c9612_2_aL	177
NHsB9_c10576_2_aL	CAGTTTTCCCAGTCACGACTGCATAAGCAATAACTCAAAGCCA	NHsB9_c10576_2_aR	GTTTTGGAAACCATTAGCACATAATTCAAA	(AT)7	(AT)7	AT	138	138	138-138	Monomorphic													NHsA8_c4909_5_aL	CAGTTTTCCCAGTCACGACAGTAGCTGCTTCCCTTGGAAAAGA		yam_NH_singleton_B310-33_9_c10576_2_a	NHsB9_c10576_2_aL	AT	2	14	(AT)	7	(AT)7			NHsB9_c10576_2_aL	(AT)7			NHsB9_c10576_2_aL	AT				NHsB9_c10576_2_a	NHsB9_c10576_2_aL	138
Oc_1854cL	CAGTTTTCCCAGTCACGACCAAGGAAGAAGGAAAGCTGAGAAA	Oc_1854cR	GTTTAAAGCAACACACAACAAGGTCGT	(GAA)15	(GAA)15	GAA	0	0	-	Didn't Work													NHc_118_aL	CAGTTTTCCCAGTCACGACTCACCACAACCCAAACAAAATACA		yam_O_contig_1854_c	Oc_1854cL	GAA	3	45	(GAA)	15	(GAA)15			Oc_1854cL	(GAA)15			Oc_1854cL	GAA				Oc_1854c	Oc_1854cL
Oc_5238_aL	CAGTTTTCCCAGTCACGACTTATTGTCAACAAGGTGGGTGCTA	Oc_5238_aR	GTTTTCATTTCATTTCATTTCAAAGGGG	(TCTCTCT)6	(TCTCTCT)6	TCTCTCT	101	129	101-129	Polymorphic													NHc_2841cL	CAGTTTTCCCAGTCACGACTGATATAAAGGGAACAAGGAATGGA		yam_O_contig_5238_a	Oc_5238_aL	TCTCTCT	7	42	(TCTCTCT)	6	(TCTCTCT)6			Oc_5238_aL	(TCTCTCT)6			Oc_5238_aL	TCTCTCT				Oc_5238_a	Oc_5238_aL	101
Oc_406cL	CAGTTTTCCCAGTCACGACACAGACTGACTAAACAGTTCCATTAGCA	Oc_406cR	GTTTGTGCTGTGCACAAGCTGAGAAG	(GA)20	(GA)20	GA	70	71	70-71	Polymorphic													NHc_3568_aL	CAGTTTTCCCAGTCACGACTATAGCTACGTCGAGCAGGTGATG		yam_O_contig_406_c	Oc_406cL	GA	2	40	(GA)	20	(GA)20			Oc_406cL	(GA)20			Oc_406cL	GA				Oc_406c	Oc_406cL	70
Oc_3527_bL	CAGTTTTCCCAGTCACGACTGATGGGATACCTTCTTTCATGCT	Oc_3527_bR	GTTTAAGCCATCACATTCACTGCAAGTA	(TA)20	(TA)20	TA	63	72	63-72	Polymorphic													NHc_6508_aL	CAGTTTTCCCAGTCACGACAAACCACTCAAACCGATCCAAGT		yam_O_contig_3527_b	Oc_3527_bL	TA	2	40	(TA)	20	(TA)20			Oc_3527_bL	(TA)20			Oc_3527_bL	TA				Oc_3527_b	Oc_3527_bL	63
Oc_627_aL	CAGTTTTCCCAGTCACGACGGAAAAGATTCTGGTGATGAGTCC	Oc_627_aR	GTTTTCTTTGTTGTGCATTGTCTTTTGTC	(AT)20	(AT)20	AT	0	0	-	Didn't Work													NHc_6655_aL	CAGTTTTCCCAGTCACGACTGCATCAATAAAAATTCAAACATCATC		yam_O_contig_627_a	Oc_627_aL	AT	2	40	(AT)	20	(AT)20			Oc_627_aL	(AT)20			Oc_627_aL	AT				Oc_627_a	Oc_627_aL
Oc_4539_aL	CAGTTTTCCCAGTCACGACTGTGCCTGCTTTTCTGTAGATTTT	Oc_4539_aR	GTTTGGAGATGGTTTGAGAGACCATTATT	(TAT)12	(TAT)12	TAT	163	313	163-313	Polymorphic													NHs87_c6808_aL	CAGTTTTCCCAGTCACGACCCGCTACCTCGCTCTCATACTC		yam_O_contig_4539_a	Oc_4539_aL	TAT	3	36	(TAT)	12	(TAT)12			Oc_4539_aL	(TAT)12			Oc_4539_aL	TAT				Oc_4539_a	Oc_4539_aL	163
Oc_2083_aL	CAGTTTTCCCAGTCACGACTATTGCTTCGCCTCTGTACAATCA	Oc_2083_aR	GTTTGGAGCACTGGTGGAGAGATTAGTG	(ATC)12	(ATC)12	ATC	156	171	156-171	Polymorphic													NHs87_c9657_aL	CAGTTTTCCCAGTCACGACAAAGGGGTTGAATTGAAGAAGGTT		yam_O_contig_2083_a	Oc_2083_aL	ATC	3	36	(ATC)	12	(ATC)12			Oc_2083_aL	(ATC)12			Oc_2083_aL	ATC				Oc_2083_a	Oc_2083_aL	156
Oc_2386_aL	CAGTTTTCCCAGTCACGACGCTGAGAATTGAAGCTCGGAGTAG	Oc_2386_aR	GTTTCCTATCAATAATTCACCCATCCCA	(ATT)12	(ATT)12	ATT	0	0	-	Didn't Work													NHs87_lrc3495_aL	CAGTTTTCCCAGTCACGACCATCTTCTCAGCCATTCCATTCTC		yam_O_contig_2386_a	Oc_2386_aL	ATT	3	36	(ATT)	12	(ATT)12			Oc_2386_aL	(ATT)12			Oc_2386_aL	ATT				Oc_2386_a	Oc_2386_aL
OsA8_c12327_3_aL	CAGTTTTCCCAGTCACGACAGAACTTGGTTTTCCTTTGCGTC	OsA8_c12327_3_aR	GTTTCAATACAAGAAGACTTTGGCGCTT	(TAA)12	(TAA)12	TAA	105	108	105-108	Polymorphic													NHs87_lrc4153_aL	CAGTTTTCCCAGTCACGACAAGAAACCTCATCTCCACCCTCTC		yam_O_singleton_A328-33_8_c12327_3_a	OsA8_c12327_3_aL	TAA	3	36	(TAA)	12	(TAA)12			OsA8_c12327_3_aL	(TAA)12			OsA8_c12327_3_aL	TAA				OsA8_c12327_3_a	OsA8_c12327_3_aL	105
Oc_2985_aL	CAGTTTTCCCAGTCACGACCCAACACCAATCCTCTAAAACAGG	Oc_2985_aR	GTTTAGAGATCTAGGGGCTTGAAAGCTG	(TCA)12	(TCA)12	TCA	145	155	145-155	Polymorphic													NHs87_lrc4525_aL	CAGTTTTCCCAGTCACGACATAAAGCCTTCTATTTCGCCAGGA		yam_O_contig_2985_a	Oc_2985_aL	TCA	3	36	(TCA)	12	(TCA)12			Oc_2985_aL	(TCA)12			Oc_2985_aL	TCA				Oc_2985_a	Oc_2985_aL	145
Oc_3971_aL	CAGTTTTCCCAGTCACGACCTAATATGGAGCCTCTCTTGCCTC	Oc_3971_aR	GTTTTTCCACAAGAATCAAGCTGGTAAT	(TTTTA)7	(TTTTA)7	TTTTA	153	163	153-163	Polymorphic													NHs87_lrc7566cL	CAGTTTTCCCAGTCACGACTGCTTGCTGCCATGAATAGTTTTA		yam_O_contig_3971_a	Oc_3971_aL	TTTTA	5	35	(TTTTA)	7	(TTTTA)7			Oc_3971_aL	(TTTTA)7			Oc_3971_aL	TTTTA				Oc_3971_a	Oc_3971_aL	153
OsA8_c1060_15_aL	CAGTTTTCCCAGTCACGACATTCAATCAGTAGAGCTGTTGGGC	OsA8_c1060_15_aR	GTTTCAATTTTCATTTCTATATTCCCATCACA	(TG)16	(TG)16	TG	172	181	172-181	Polymorphic													NHs87_lrc7899_aL	CAGTTTTCCCAGTCACGACGGATCCGGATTTGGTATGGAG		yam_O_singleton_A328-33_8_c1060_15_a	OsA8_c1060_15_aL	TG	2	32	(TG)	16	(TG)16			OsA8_c1060_15_aL	(TG)16			OsA8_c1060_15_aL	TG				OsA8_c1060_15_a	OsA8_c1060_15_aL	172
Oc_1364_aL	CAGTTTTCCCAGTCACGACGTTGGAACCTTGGATCTCGATG	Oc_1364_aR	GTTTGAGATATAGGATCTCGGAGGAGGG	(AAGGCG)5	(AAGGCG)5	AAGGCG	163	163	163-163	Monomorphic													NHs87_lrc8239_aL	CAGTTTTCCCAGTCACGACCATCAGCTCTTTCCCACCACTT		yam_O_contig_1364_a	Oc_1364_aL	AAGGCG	6	30	(AAGGCG)	5	(AAGGCG)5			Oc_1364_aL	(AAGGCG)5			Oc_1364_aL	AAGGCG				Oc_1364_a	Oc_1364_aL	163
Oc_5075_aL	CAGTTTTCCCAGTCACGACATGGTTAAGCACACACCACCTTCT	Oc_5075_aR	GTTTAGAGGTACAAGGATTGCGAGTTTG	(TTCTCC)5	(TTCTCC)5	TTCTCC	146	146	146-146	Monomorphic													NHsA8_c10943_3_aL	CAGTTTTCCCAGTCACGACCATTAACAGAGAAGAAGGAGAAAGAGAG		yam_O_contig_5075_a	Oc_5075_aL	TTCTCC	6	30	(TTCTCC)	5	(TTCTCC)5			Oc_5075_aL	(TTCTCC)5			Oc_5075_aL	TTCTCC				Oc_5075_a	Oc_5075_aL	146
Oc_2919_aL	CAGTTTTCCCAGTCACGACACCGTCAACGAAGCTCAGTCC	Oc_2919_aR	GTTTACCGTAGCCTCCACCAGCAC	(GCGGTG)5	(GCGGTG)5	GCGGTG	109	115	109-115	Polymorphic													NHsA8_c11845_2_aL	CAGTTTTCCCAGTCACGACAAGTGGTTCGAAGGTTCGTCAAG		yam_O_contig_2919_a	Oc_2919_aL	GCGGTG	6	30	(GCGGTG)	5	(GCGGTG)5			Oc_2919_aL	(GCGGTG)5			Oc_2919_aL	GCGGTG				Oc_2919_a	Oc_2919_aL	109
Oc_1547_aL	CAGTTTTCCCAGTCACGACAAGAATCACAAGCATTGGCATGTA	Oc_1547_aR	GTTTTAGCTTTGCTTGAGAATCAGGCTT	(TGA)10	(TGA)10	TGA	257	302	257-302	Polymorphic													NHsA8_c12478_2_aL	CAGTTTTCCCAGTCACGACTCCAATCCGTGGATTTAATACTTC		yam_O_contig_1547_a	Oc_1547_aL	TGA	3	30	(TGA)	10	(TGA)10			Oc_1547_aL	(TGA)10			Oc_1547_aL	TGA				Oc_1547_a	Oc_1547_aL	257
Oc_248_aL	CAGTTTTCCCAGTCACGACTGGCAGCAACTTCTTTATTTATGGA	Oc_248_aR	GTTTTCTGCGTGCACGTTAGAGTCTATT	(AAC)10	(AAC)10	AAC	170	176	170-176	Polymorphic													NHsA8_c12905_2_aL	CAGTTTTCCCAGTCACGACTTATTTTCAGAAATGGGGAAGGCT		yam_O_contig_248_a	Oc_248_aL	AAC	3	30	(AAC)	10	(AAC)10			Oc_248_aL	(AAC)10			Oc_248_aL	AAC				Oc_248_a	Oc_248_aL	170
Oc_4467_aL	CAGTTTTCCCAGTCACGACCCTGCATAAGACATAAGCTCTCAACA	Oc_4467_aR	GTTTAGACCTTCTTCTTGTTGGCCTTTC	(AT)15	(AT)15	AT	0	0	-	Didn't Work													NHsA8_c13017_2_aL	CAGTTTTCCCAGTCACGACTCGATTTGTATAGCAACAAACTGACT		yam_O_contig_4467_a	Oc_4467_aL	AT	2	30	(AT)	15	(AT)15			Oc_4467_aL	(AT)15			Oc_4467_aL	AT				Oc_4467_a	Oc_4467_aL
Oc_587_aL	CAGTTTTCCCAGTCACGACATCTGAAGCCCTCCTGCTTACTTC	Oc_587_aR	GTTTTCCTCTTATGCATGCCCATTTATT	(TGCTTG)5	(TGCTTG)5	TGCTTG	114	134	114-134	Polymorphic													NHsA8_c13304_2_aL	CAGTTTTCCCAGTCACGACTGAATTCCTAATAACGCCAAGAAGA		yam_O_contig_587_a	Oc_587_aL	TGCTTG	6	30	(TGCTTG)	5	(TGCTTG)5			Oc_587_aL	(TGCTTG)5			Oc_587_aL	TGCTTG				Oc_587_a	Oc_587_aL	114
Os87_c4306_aL	CAGTTTTCCCAGTCACGACCCAATGCACCACCACCTCTACT	Os87_c4306_aR	GTTTTGTTAACTCGGCCACTTCGTACTC	(CCA)10	(CCA)10	CCA	115	188	115-188	Polymorphic													NHsA8_c13798_2_aL	CAGTTTTCCCAGTCACGACGTCCGTGGGTGTCTACACTAGCTT		yam_O_singleton_87-01091-33_1_c4306_a	Os87_c4306_aL	CCA	3	30	(CCA)	10	(CCA)10			Os87_c4306_aL	(CCA)10			Os87_c4306_aL	CCA				Os87_c4306_a	Os87_c4306_aL	115
Oc_6102_aL	CAGTTTTCCCAGTCACGACGGCCAGTAATGGTTCTTGTTCATC	Oc_6102_aR	GTTTGATGAGGATGTCTCTGCTCCTGAT	(TCATCC)5	(TCATCC)5	TCATCC	133	156	133-156	Polymorphic													NHsA8_c6498_3_aL	CAGTTTTCCCAGTCACGACACCTGAGTTTGGATGTTGGAAGAG		yam_O_contig_6102_a	Oc_6102_aL	TCATCC	6	30	(TCATCC)	5	(TCATCC)5			Oc_6102_aL	(TCATCC)5			Oc_6102_aL	TCATCC				Oc_6102_a	Oc_6102_aL	133
Os87_lrc10849_aL	CAGTTTTCCCAGTCACGACTACCTGATGGGCGTCTAGGATATG	Os87_lrc10849_aR	GTTTGTCATTGTCATTGTTTTTCCGTCC	(GTG)10	(GTG)10	GTG	344	344	344-344	Monomorphic													NHsA8_c7168_4_aL	CAGTTTTCCCAGTCACGACAACCATTCTGGTTGATTCTTGGAG		yam_O_singleton_87-01091-33_1_lrc10849_a	Os87_lrc10849_aL	GTG	3	30	(GTG)	10	(GTG)10			Os87_lrc10849_aL	(GTG)10			Os87_lrc10849_aL	GTG				Os87_lrc10849_a	Os87_lrc10849_aL	344
Oc_234_aL	CAGTTTTCCCAGTCACGACTTGCTCGCTGAGAAGTCGAATAAT	Oc_234_aR	GTTTTTTATTCATTTTTGCAATTAAACCACAA	(TAT)10	(TAT)10	TAT	0	0	-	Didn't Work													NHsA8_c8558_3_aL	CAGTTTTCCCAGTCACGACGGTTTCTCCACAAACATCAATCCT		yam_O_contig_234_a	Oc_234_aL	TAT	3	30	(TAT)	10	(TAT)10			Oc_234_aL	(TAT)10			Oc_234_aL	TAT				Oc_234_a	Oc_234_aL
Os87_c878_aL	CAGTTTTCCCAGTCACGACTGCACCATGCTCAAGAAGTAACTC	Os87_c878_aR	GTTTTTGGGCTTTCCTTGCAATCTATTA	(TAC)10	(TAC)10	TAC	168	177	168-177	Polymorphic													NHsA8_c9177_3_aL	CAGTTTTCCCAGTCACGACTTAGTATGACGTGTGGCTGTGGAT		yam_O_singleton_87-01091-33_1_c878_a	Os87_c878_aL	TAC	3	30	(TAC)	10	(TAC)10			Os87_c878_aL	(TAC)10			Os87_c878_aL	TAC				Os87_c878_a	Os87_c878_aL	168
Oc_4934_aL	CAGTTTTCCCAGTCACGACCTAATCGCGACTCCTCCTCGT	Oc_4934_aR	GTTTGCTATATACCTCCTCTCCGCGTCT	(TCCTTC)5	(TCCTTC)5	TCCTTC	168	183	168-183	Polymorphic													NHsA8_c9294_2_aL	CAGTTTTCCCAGTCACGACTGGGGATTAGAATCAAAGAAGGTG		yam_O_contig_4934_a	Oc_4934_aL	TCCTTC	6	30	(TCCTTC)	5	(TCCTTC)5			Oc_4934_aL	(TCCTTC)5			Oc_4934_aL	TCCTTC				Oc_4934_a	Oc_4934_aL	168
Os87_c4306_aL	CAGTTTTCCCAGTCACGACCCAATGCACCACCACCTCTACT	Os87_c4306_aR	GTTTTGTTAACTCGGCCACTTCGTACTC	(CCA)10	(CCA)10	CCA	115	188	115-188	Polymorphic													NHsB9_c12106_2_aL	CAGTTTTCCCAGTCACGACAAGCTTCTTGACTTCGAGTGATGG		yam_O_singleton_87-01091-33_1_c4306_a	Os87_c4306_aL	CCA	3	30	(CCA)	10	(CCA)10			Os87_c4306_aL	(CCA)10			Os87_c4306_aL	CCA				Os87_c4306_a	Os87_c4306_aL	74
Oc_3654_aL	CAGTTTTCCCAGTCACGACGGTTGAGTAACGCGAACATTCACT	Oc_3654_aR	GTTTGGCAACGAATGGAAAAGAATCAAT	(AAAT)7	(AAAT)7	AAAT	133	142	133-142	Polymorphic													NHsB9_c12383_2_aL	CAGTTTTCCCAGTCACGACTTCAAAGCGAATTTTGGAAGAGAG		yam_O_contig_3654_a	Oc_3654_aL	AAAT	4	28	(AAAT)	7	(AAAT)7			Oc_3654_aL	(AAAT)7			Oc_3654_aL	AAAT				Oc_3654_a	Oc_3654_aL	133
Oc_3101_aL	CAGTTTTCCCAGTCACGACCCTAGAGGGAAGTCACAGGTTGAA	Oc_3101_aR	GTTTACCCATAGAAACCCTAATCAAGCC	(TATC)7	(TATC)7	TATC	172	193	172-193	Polymorphic													NHsB9_c12502_2_aL	CAGTTTTCCCAGTCACGACTCAGACCATACACTTCAGCCAAAA		yam_O_contig_3101_a	Oc_3101_aL	TATC	4	28	(TATC)	7	(TATC)7			Oc_3101_aL	(TATC)7			Oc_3101_aL	TATC				Oc_3101_a	Oc_3101_aL	172
Oc_4395_aL	CAGTTTTCCCAGTCACGACTGAATCAATTGTATAGCAGGGTGG	Oc_4395_aR	GTTTCAATTTCCCTGGTGATAAAGTTTTG	(CTTT)7	(CTTT)7	CTTT	171	175	171-175	Polymorphic													NHsB9_c13279_2_aL	CAGTTTTCCCAGTCACGACGTTGGATCAACTGATTTTGCTCCT		yam_O_contig_4395_a	Oc_4395_aL	CTTT	4	28	(CTTT)	7	(CTTT)7			Oc_4395_aL	(CTTT)7			Oc_4395_aL	CTTT				Oc_4395_a	Oc_4395_aL	171
Oc_360_aL	CAGTTTTCCCAGTCACGACTCTCTTCTGGATTCCTTCGTGAAC	Oc_360_aR	GTTTAAAATCCACAAAGCAATCATCACTC	(CTTTT)5	(CTTTT)5	CTTTT	166	177	166-177	Polymorphic													NHc_3210_eL	CAGTTTTCCCAGTCACGACTGGTACAATGAGGAGAAAATCAAGG		yam_O_contig_360_a	Oc_360_aL	CTTTT	5	25	(CTTTT)	5	(CTTTT)5			Oc_360_aL	(CTTTT)5			Oc_360_aL	CTTTT				Oc_360_a	Oc_360_aL	166
Oc_205_aL	CAGTTTTCCCAGTCACGACTTTGGGATCAAAACATAGATACACACA	Oc_205_aR	GTTTTGGCATCAACTGGTCATTAAGTGT	(TGTTT)5	(TGTTT)5	TGTTT	163	179	163-179	Polymorphic													Wc_3855_aR	GTTTGCTTGGTTGGAGATCAACAAGTCT		yam_O_contig_205_a	Oc_205_aL	TGTTT	5	25	(TGTTT)	5	(TGTTT)5			Oc_205_aL	(TGTTT)5			Oc_205_aL	TGTTT				Oc_205_a	Oc_205_aL	163
Oc_3981_aL	CAGTTTTCCCAGTCACGACATGAGGGTTTGTATGTGTGAGGAA	Oc_3981_aR	GTTTTTTTTGTCTTTGGCTTGTAAACTAATTC	(AAT)8	(AAT)8	AAT	142	148	142-148	Polymorphic													Wc_3893_aR	GTTTATACCCCTTTGATGGTGTTGTTTG		yam_O_contig_3981_a	Oc_3981_aL	AAT	3	24	(AAT)	8	(AAT)8			Oc_3981_aL	(AAT)8			Oc_3981_aL	AAT				Oc_3981_a	Oc_3981_aL	142
OsA8_c3645_12_aL	CAGTTTTCCCAGTCACGACGCTTACTGAAGAAGAATTGGCTGC	OsA8_c3645_12_aR	GTTTTTGCATCTTGGTGAAGGAGTTGTA	(GAA)8	(GAA)8	GAA	172	172	172-172	Monomorphic													Wc_3943_aR	GTTTGCCCATCAGCATCAGTACTACCAT		yam_O_singleton_A328-33_8_c3645_12_a	OsA8_c3645_12_aL	GAA	3	24	(GAA)	8	(GAA)8			OsA8_c3645_12_aL	(GAA)8			OsA8_c3645_12_aL	GAA				OsA8_c3645_12_a	OsA8_c3645_12_aL	172
Oc_3514_aL	CAGTTTTCCCAGTCACGACCATTCCTCCGATCAGAGCCTAAC	Oc_3514_aR	GTTTGGCGGTAGTTGTTGTTGTAGTTGTT	(ACA)8	(ACA)8	ACA	0	0	-	Didn't Work													Wc_403_aR	GTTTCGTCAATTATATCCGGATGGAGAG		yam_O_contig_3514_a	Oc_3514_aL	ACA	3	24	(ACA)	8	(ACA)8			Oc_3514_aL	(ACA)8			Oc_3514_aL	ACA				Oc_3514_a	Oc_3514_aL
Oc_3514cL	CAGTTTTCCCAGTCACGACCTTCAAGCTCAGTACCAGGCAG	Oc_3514cR	GTTTAAAAACAAAATACTCCTCTGCTAATCAC	(CGC)8	(CGC)8	CGC	159	159	159-159	Monomorphic													Wc_4176_aR	GTTTCAACACATCCCAGATGGAGTTACA		yam_O_contig_3514_c	Oc_3514cL	CGC	3	24	(CGC)	8	(CGC)8			Oc_3514cL	(CGC)8			Oc_3514cL	CGC				Oc_3514c	Oc_3514cL	159
Oc_3758cL	CAGTTTTCCCAGTCACGACAATGGTGCAAATAGATCCCATTTCT	Oc_3758cR	GTTTCCTCTCATCACACACCACAATCA	(TTAA)6	(TTAA)6	TTAA	181	182	181-182	Polymorphic													Wc_4215_aR	GTTTTAAAGCAAGTAGAGGAGGGTGCTG		yam_O_contig_3758_c	Oc_3758cL	TTAA	4	24	(TTAA)	6	(TTAA)6			Oc_3758cL	(TTAA)6			Oc_3758cL	TTAA				Oc_3758c	Oc_3758cL	181
Oc_1833_aL	CAGTTTTCCCAGTCACGACTACTGCGTGCTAGGCAATCTGTAG	Oc_1833_aR	GTTTCTGCTGCAGCCTTGAGACTTATC	(AAT)8	(AAT)8	AAT	0	0	-	Didn't Work													Wc_423_aR	GTTTCCTCCAAGATGATGTTAAATTCCG		yam_O_contig_1833_a	Oc_1833_aL	AAT	3	24	(AAT)	8	(AAT)8			Oc_1833_aL	(AAT)8			Oc_1833_aL	AAT				Oc_1833_a	Oc_1833_aL
Oc_586_aL	CAGTTTTCCCAGTCACGACGATGCTGCTGTCTCGGTTTATCAT	Oc_586_aR	GTTTACTGGAGATCATCCTCCTCTTCG	(GCA)8	(GCA)8	GCA	138	145	138-145	Polymorphic													Wc_4308_aR	GTTTAGCTTTGGAACATACACCCAAATG		yam_O_contig_586_a	Oc_586_aL	GCA	3	24	(GCA)	8	(GCA)8			Oc_586_aL	(GCA)8			Oc_586_aL	GCA				Oc_586_a	Oc_586_aL	138
Oc_5440_aL	CAGTTTTCCCAGTCACGACTGTTCCTTACCTTCTCAAAGAGACTCA	Oc_5440_aR	GTTTCATTGTCACAAAGGGACATTCTCA	(GATGAG)4	(GATGAG)4	GATGAG	173	185	173-185	Polymorphic													Wc_4334_aR	GTTTTAGTCTTCACTCCCGAACTCAACC		yam_O_contig_5440_a	Oc_5440_aL	GATGAG	6	24	(GATGAG)	4	(GATGAG)4			Oc_5440_aL	(GATGAG)4			Oc_5440_aL	GATGAG				Oc_5440_a	Oc_5440_aL	173
Os87_c937_aL	CAGTTTTCCCAGTCACGACCTATTCCTGCCCAAGACTATCCCT	Os87_c937_aR	GTTTGACCACAACAAACAACAAACAACC	(TCT)8	(TCT)8	TCT	112	124	112-124	Polymorphic													Wc_4336_aR	GTTTGATGCAGGGTTCTAAGGACACTCT		yam_O_singleton_87-01091-33_1_c937_a	Os87_c937_aL	TCT	3	24	(TCT)	8	(TCT)8			Os87_c937_aL	(TCT)8			Os87_c937_aL	TCT				Os87_c937_a	Os87_c937_aL	112
Oc_951_aL	CAGTTTTCCCAGTCACGACAAGTCTCGAGCATTCCCCTACTCT	Oc_951_aR	GTTTCATTTTCGAAGCGATCGAGAGA	(CTCCAT)4	(CTCCAT)4	CTCCAT	97	97	97-97	Monomorphic													Wc_4372_aR	GTTTTGAGACAAGACGATGAAGAGGATG		yam_O_contig_951_a	Oc_951_aL	CTCCAT	6	24	(CTCCAT)	4	(CTCCAT)4			Oc_951_aL	(CTCCAT)4			Oc_951_aL	CTCCAT				Oc_951_a	Oc_951_aL	97
Oc_5610_aL	CAGTTTTCCCAGTCACGACCCCTTCTCCATCTCCTTCTTCTCT	Oc_5610_aR	GTTTAGCTTGGCCATCTCTTACTCCAAT	(GAGATC)4	(GAGATC)4	GAGATC	95	108	95-108	Polymorphic													NHc_4177_aR	GTTTAAAAGAAGGAGCTACAAAATAAAGTTCA		yam_O_contig_5610_a	Oc_5610_aL	GAGATC	6	24	(GAGATC)	4	(GAGATC)4			Oc_5610_aL	(GAGATC)4			Oc_5610_aL	GAGATC				Oc_5610_a	Oc_5610_aL	95
Oc_3321_aL	CAGTTTTCCCAGTCACGACGCTATTTCATCTTGTTTTTCCCCC	Oc_3321_aR	GTTTTCCAGGAACAAATGGTTTGAGATT	(TGT)8	(TGT)8	TGT	134	144	134-144	Polymorphic													NHsB9_c13712_2_aR	GTTTAAACTCTCAAGAAACAACATCAACAACT		yam_O_contig_3321_a	Oc_3321_aL	TGT	3	24	(TGT)	8	(TGT)8			Oc_3321_aL	(TGT)8			Oc_3321_aL	TGT				Oc_3321_a	Oc_3321_aL	134
Oc_6254_aL	CAGTTTTCCCAGTCACGACGACGTTATCTCCATTGCTTCGTCT	Oc_6254_aR	GTTTGGATTAAGGAAGGGCTGTTGAGAT	(CT)12	(CT)12	CT	121	129	121-129	Polymorphic													NHc_1742_aR	GTTTCCGTGACTCTGACAACTGTGTACC		yam_O_contig_6254_a	Oc_6254_aL	CT	2	24	(CT)	12	(CT)12			Oc_6254_aL	(CT)12			Oc_6254_aL	CT				Oc_6254_a	Oc_6254_aL	121
Oc_446_aL	CAGTTTTCCCAGTCACGACCTAAGCCTCCGACGAAGAAGC	Oc_446_aR	GTTTATCTTGGACTTCGACTTGGCAG	(CTAAGC)4	(CTAAGC)4	CTAAGC	174	180	174-180	Polymorphic													NHc_2230_aR	GTTTTGCAGTGATCTCTTCATGGACAA		yam_O_contig_446_a	Oc_446_aL	CTAAGC	6	24	(CTAAGC)	4	(CTAAGC)4			Oc_446_aL	(CTAAGC)4			Oc_446_aL	CTAAGC				Oc_446_a	Oc_446_aL	174
Oc_5376_aL	CAGTTTTCCCAGTCACGACCCGCAGGCCAATAATAAAGTAAGA	Oc_5376_aR	GTTTCATCAGTGACTCCAATTTCACACC	(TAAA)6	(TAAA)6	TAAA	125	130	125-130	Polymorphic													NHsA8_c12418_2_aR	GTTTTGATTGGATATTTATTCTTTCGTTATGA		yam_O_contig_5376_a	Oc_5376_aL	TAAA	4	24	(TAAA)	6	(TAAA)6			Oc_5376_aL	(TAAA)6			Oc_5376_aL	TAAA				Oc_5376_a	Oc_5376_aL	125
Oc_1086_aL	CAGTTTTCCCAGTCACGACGAATTCCCGGGATAAACCAACT	Oc_1086_aR	GTTTCAATAGCATGTAGGGCGAGGAC	(TCT)8	(TCT)8	TCT	264	267	264-267	Polymorphic													NHc_7064_aR	GTTTGAGACCTCAAACTCAATCCACTGAA		yam_O_contig_1086_a	Oc_1086_aL	TCT	3	24	(TCT)	8	(TCT)8			Oc_1086_aL	(TCT)8			Oc_1086_aL	TCT				Oc_1086_a	Oc_1086_aL	264
Oc_512_aL	CAGTTTTCCCAGTCACGACGTCCCAAGCTGCTACCCTGAATA	Oc_512_aR	GTTTATAGGATTTCCATCGCTCCAAAGT	(CGCCGT)4	(CGCCGT)4	CGCCGT	0	0	-	Didn't Work													NHsA8_c4909_5_aR	GTTTCACATACAAACATGCAGGATGCTC		yam_O_contig_512_a	Oc_512_aL	CGCCGT	6	24	(CGCCGT)	4	(CGCCGT)4			Oc_512_aL	(CGCCGT)4			Oc_512_aL	CGCCGT				Oc_512_a	Oc_512_aL
Oc_1038_aL	CAGTTTTCCCAGTCACGACATAGGGACGAGACTCAGGACCAG	Oc_1038_aR	GTTTACAGAAGTGACGGGGTCGATAG	(CAG)8	(CAG)8	CAG	126	135	126-135	Polymorphic													NHc_118_aR	GTTTGAAAAGGTAGGTGGTTTTTGTGGA		yam_O_contig_1038_a	Oc_1038_aL	CAG	3	24	(CAG)	8	(CAG)8			Oc_1038_aL	(CAG)8			Oc_1038_aL	CAG				Oc_1038_a	Oc_1038_aL	126
Oc_5776_bL	CAGTTTTCCCAGTCACGACCGGAATCAAGCTGTGTTACTGATG	Oc_5776_bR	GTTTTCAATGCAAACAAAGAACAAGTAATCA	(TAA)8	(TAA)8	TAA	176	330	176-330	Polymorphic													NHc_2841cR	GTTTTCAAGAGAAGAAAAGTGTTACAGGAATG		yam_O_contig_5776_b	Oc_5776_bL	TAA	3	24	(TAA)	8	(TAA)8			Oc_5776_bL	(TAA)8			Oc_5776_bL	TAA				Oc_5776_b	Oc_5776_bL	176
Oc_7199_aL	CAGTTTTCCCAGTCACGACAGCAGAGTGTTTTAGCCAATGTGA	Oc_7199_aR	GTTTCCTGATTTTTCACCTTGTTCTTGC	(ACA)8	(ACA)8	ACA	133	149	133-149	Polymorphic													NHc_3568_aR	GTTTTTTCAGCCCTGACTATGACAGAGA		yam_O_contig_7199_a	Oc_7199_aL	ACA	3	24	(ACA)	8	(ACA)8			Oc_7199_aL	(ACA)8			Oc_7199_aL	ACA				Oc_7199_a	Oc_7199_aL	133
Oc_1786_aL	CAGTTTTCCCAGTCACGACCTTCTTGGTCCACTTGCTCAACTT	Oc_1786_aR	GTTTCTTCGTGCTTTATCAGGATGTGG	(TC)12	(TC)12	TC	166	188	166-188	Polymorphic													NHc_6508_aR	GTTTGGAGTTGTTCCTGTTGTGCTGTT		yam_O_contig_1786_a	Oc_1786_aL	TC	2	24	(TC)	12	(TC)12			Oc_1786_aL	(TC)12			Oc_1786_aL	TC				Oc_1786_a	Oc_1786_aL	166
Oc_4851_bL	CAGTTTTCCCAGTCACGACGTTCTTGATGTCTGCTGCGAATTA	Oc_4851_bR	GTTTGACACTTCCTAAGAAGGGCTACACA	(TG)12	(TG)12	TG	142	170	142-170	Polymorphic													NHc_6655_aR	GTTTTGGTTGAAGTGGTGTCTTTGCTTA		yam_O_contig_4851_b	Oc_4851_bL	TG	2	24	(TG)	12	(TG)12			Oc_4851_bL	(TG)12			Oc_4851_bL	TG				Oc_4851_b	Oc_4851_bL	142
Oc_898_aL	CAGTTTTCCCAGTCACGACAAACCATCCTTGTCACAACACCTAA	Oc_898_aR	GTTTCCAATTAACACACCTTGATCACCA	(TACA)6	(TACA)6	TACA	154	154	154-154	Monomorphic													NHs87_c6808_aR	GTTTCGGCGTTGAATTTGTCTATTTTGT		yam_O_contig_898_a	Oc_898_aL	TACA	4	24	(TACA)	6	(TACA)6			Oc_898_aL	(TACA)6			Oc_898_aL	TACA				Oc_898_a	Oc_898_aL	154
Oc_4953_dL	CAGTTTTCCCAGTCACGACGGTTAGGAATGGGAGAATGATTGA	Oc_4953_dR	GTTTAAGCAGGCTAACAGTTGGTGAAAA	(TGT)8	(TGT)8	TGT	177	184	177-184	Polymorphic													NHs87_c9657_aR	GTTTCCCTAATGCCATTTCTTATCTACTCC		yam_O_contig_4953_d	Oc_4953_dL	TGT	3	24	(TGT)	8	(TGT)8			Oc_4953_dL	(TGT)8			Oc_4953_dL	TGT				Oc_4953_d	Oc_4953_dL	177
Oc_5519_aL	CAGTTTTCCCAGTCACGACGCAAAGGAAAAGCTAGCATCAAAG	Oc_5519_aR	GTTTTGAAATGGAACTACAATCCTTCCAA	(TGA)8	(TGA)8	TGA	175	310	175-310	Polymorphic													NHs87_lrc3495_aR	GTTTGTGTTAGGGTTTCGAAGTGGGAGT		yam_O_contig_5519_a	Oc_5519_aL	TGA	3	24	(TGA)	8	(TGA)8			Oc_5519_aL	(TGA)8			Oc_5519_aL	TGA				Oc_5519_a	Oc_5519_aL	175
Oc_5824_aL	CAGTTTTCCCAGTCACGACGCTGAGAAGAGATCGAAGATGGTG	Oc_5824_aR	GTTTCGGGATCTTCCCTAATCTCCTTC	(AGGAGA)4	(AGGAGA)4	AGGAGA	101	101	101-101	Monomorphic													NHs87_lrc4153_aR	GTTTAGCTAGGGTATATGGGGAAGCAAT		yam_O_contig_5824_a	Oc_5824_aL	AGGAGA	6	24	(AGGAGA)	4	(AGGAGA)4			Oc_5824_aL	(AGGAGA)4			Oc_5824_aL	AGGAGA				Oc_5824_a	Oc_5824_aL	101
Oc_3199_aL	CAGTTTTCCCAGTCACGACCACAAACACTGGGACTTTTCATCA	Oc_3199_aR	GTTTTAAAGATGTTTGGTCTCGTCTGGC	(CAGACC)4	(CAGACC)4	CAGACC	167	173	167-173	Polymorphic													NHs87_lrc4525_aR	GTTTATGGAATACCTTCGTTAGCGAGC		yam_O_contig_3199_a	Oc_3199_aL	CAGACC	6	24	(CAGACC)	4	(CAGACC)4			Oc_3199_aL	(CAGACC)4			Oc_3199_aL	CAGACC				Oc_3199_a	Oc_3199_aL	167
Oc_2547_aL	CAGTTTTCCCAGTCACGACCAAAAGTTTCCACAACCTCTCTGG	Oc_2547_aR	GTTTAACATCCAACAACCGAGCTTAAAA	(CT)12	(CT)12	CT	124	137	124-137	Polymorphic													NHs87_lrc7566cR	GTTTCTTCTTCTTCCTGCTGTTGTTGCT		yam_O_contig_2547_a	Oc_2547_aL	CT	2	24	(CT)	12	(CT)12			Oc_2547_aL	(CT)12			Oc_2547_aL	CT				Oc_2547_a	Oc_2547_aL	124
Oc_2852_aL	CAGTTTTCCCAGTCACGACAATGCTTGCTGACAAAGGCAA	Oc_2852_aR	GTTTACTGAGCTTCCCACTAGCCTACAG	(TTCACC)4	(TTCACC)4	TTCACC	155	179	155-179	Polymorphic													NHs87_lrc7899_aR	GTTTACGTTACCAAACCCACTAAACCC		yam_O_contig_2852_a	Oc_2852_aL	TTCACC	6	24	(TTCACC)	4	(TTCACC)4			Oc_2852_aL	(TTCACC)4			Oc_2852_aL	TTCACC				Oc_2852_a	Oc_2852_aL	155
Os87_c4483_aL	CAGTTTTCCCAGTCACGACCTTCTTCTTTGCTTCTCGTTCTCG	Os87_c4483_aR	GTTTCATCTTCTCCACTTCCTTCCAAAA	(ATTG)6	(ATTG)6	ATTG	91	111	91-111	Polymorphic													NHs87_lrc8239_aR	GTTTTGATCTTGTTGTGCTTTGATTTCAT		yam_O_singleton_87-01091-33_1_c4483_a	Os87_c4483_aL	ATTG	4	24	(ATTG)	6	(ATTG)6			Os87_c4483_aL	(ATTG)6			Os87_c4483_aL	ATTG				Os87_c4483_a	Os87_c4483_aL	91
Oc_5393_aL	CAGTTTTCCCAGTCACGACTTGTCCATCTTTTGGGGTACTGTT	Oc_5393_aR	GTTTAAAAACATAAAATGCAAAACAATCCTG	(TGA)8	(TGA)8	TGA	165	174	165-174	Polymorphic													NHsA8_c10943_3_aR	GTTTATGCTTGGGTTTCTCAGATTTTCT		yam_O_contig_5393_a	Oc_5393_aL	TGA	3	24	(TGA)	8	(TGA)8			Oc_5393_aL	(TGA)8			Oc_5393_aL	TGA				Oc_5393_a	Oc_5393_aL	165
Oc_6407_aL	CAGTTTTCCCAGTCACGACCGGGAAACAAATAACAATACCCTTC	Oc_6407_aR	GTTTAAGCGTAGAGATATCCCAGTTTGG	(CTT)8	(CTT)8	CTT	152	161	152-161	Polymorphic													NHsA8_c11845_2_aR	GTTTGAGAAGAGCGGTGTGCTGATAGAG		yam_O_contig_6407_a	Oc_6407_aL	CTT	3	24	(CTT)	8	(CTT)8			Oc_6407_aL	(CTT)8			Oc_6407_aL	CTT				Oc_6407_a	Oc_6407_aL	152
Oc_5164_bL	CAGTTTTCCCAGTCACGACTATGAGCAATGGTTGAGAAGGACA	Oc_5164_bR	GTTTATAATGCATGGCTTTTCCAAATCA	(ATTG)6	(ATTG)6	ATTG	143	167	143-167	Polymorphic													NHsA8_c12478_2_aR	GTTTAACTAATAGAAATACAGGTTTCCAGCAT		yam_O_contig_5164_b	Oc_5164_bL	ATTG	4	24	(ATTG)	6	(ATTG)6			Oc_5164_bL	(ATTG)6			Oc_5164_bL	ATTG				Oc_5164_b	Oc_5164_bL	143
Oc_6262_aL	CAGTTTTCCCAGTCACGACCGGGATTGATAAAGGACTTGAAAA	Oc_6262_aR	GTTTAAGATCTTCTAGGATTGCCACCAC	(ATAC)6	(ATAC)6	ATAC	170	170	170-170	Monomorphic													NHsA8_c12905_2_aR	GTTTGGGTCGGTTATAGCACCAAACTTA		yam_O_contig_6262_a	Oc_6262_aL	ATAC	4	24	(ATAC)	6	(ATAC)6			Oc_6262_aL	(ATAC)6			Oc_6262_aL	ATAC				Oc_6262_a	Oc_6262_aL	170
Oc_718_aL	CAGTTTTCCCAGTCACGACGCAGGGGAAACTATGTCAAGATGT	Oc_718_aR	GTTTGTTACAGCATACAAAAGGCCCAAC	(TTG)8	(TTG)8	TTG	173	176	173-176	Polymorphic													NHsA8_c13017_2_aR	GTTTCATACACTGATACACAGTTTTCCCAA		yam_O_contig_718_a	Oc_718_aL	TTG	3	24	(TTG)	8	(TTG)8			Oc_718_aL	(TTG)8			Oc_718_aL	TTG				Oc_718_a	Oc_718_aL	173
Oc_1086_aL	CAGTTTTCCCAGTCACGACGAATTCCCGGGATAAACCAACT	Oc_1086_aR	GTTTCAATAGCATGTAGGGCGAGGAC	(TCT)8	(TCT)8	TCT	264	267	264-267	Polymorphic													NHsA8_c13304_2_aR	GTTTGAGCTCCGAAATTGGTACCTCTAA		yam_O_contig_1086_a	Oc_1086_aL	TCT	3	24	(TCT)	8	(TCT)8			Oc_1086_aL	(TCT)8			Oc_1086_aL	TCT				Oc_1086_a	Oc_1086_aL
Oc_4868_aL	CAGTTTTCCCAGTCACGACACTAAATTCCCATTCCTGTTCCGT	Oc_4868_aR	GTTTGGGATAAACACCACTGGCCTTATT	(AAAT)6	(AAAT)6	AAAT	171	175	171-175	Polymorphic													NHsA8_c13798_2_aR	GTTTAGCCATAGATGATGCTCAGTCTCC		yam_O_contig_4868_a	Oc_4868_aL	AAAT	4	24	(AAAT)	6	(AAAT)6			Oc_4868_aL	(AAAT)6			Oc_4868_aL	AAAT				Oc_4868_a	Oc_4868_aL	171
Oc_3279_aL	CAGTTTTCCCAGTCACGACTCGTATTGAAGCAGCTCATGAAAG	Oc_3279_aR	GTTTGTAGCTGATCAACCACGTAACGCT	(CCAGCT)4	(CCAGCT)4	CCAGCT	104	116	104-116	Polymorphic													NHsA8_c6498_3_aR	GTTTACATGAGAGAACCATTAATGAGACCA		yam_O_contig_3279_a	Oc_3279_aL	CCAGCT	6	24	(CCAGCT)	4	(CCAGCT)4			Oc_3279_aL	(CCAGCT)4			Oc_3279_aL	CCAGCT				Oc_3279_a	Oc_3279_aL	104
Os87_c10801_aL	CAGTTTTCCCAGTCACGACTCCATGAACTGGATTTATGATTTTGA	Os87_c10801_aR	GTTTACTTTCAAGAAATGCAGGCAACTT	(AAAT)6	(AAAT)6	AAAT	115	119	115-119	Polymorphic													NHsA8_c7168_4_aR	GTTTACTTCAAAGAGTTGCCATGATAAACA		yam_O_singleton_87-01091-33_1_c10801_a	Os87_c10801_aL	AAAT	4	24	(AAAT)	6	(AAAT)6			Os87_c10801_aL	(AAAT)6			Os87_c10801_aL	AAAT				Os87_c10801_a	Os87_c10801_aL	115
Oc_3451_aL	CAGTTTTCCCAGTCACGACGAAAAGGCTCATCTTTTCCTCTCC	Oc_3451_aR	GTTTCTAATCCAAAGACGAAGCACGAAG	(TCT)8	(TCT)8	TCT	171	184	171-184	Polymorphic													NHsA8_c8558_3_aR	GTTTTGCAAAGGAGTCCAAGAAAAATTC		yam_O_contig_3451_a	Oc_3451_aL	TCT	3	24	(TCT)	8	(TCT)8			Oc_3451_aL	(TCT)8			Oc_3451_aL	TCT				Oc_3451_a	Oc_3451_aL	171
Os87_lrc4485_aL	CAGTTTTCCCAGTCACGACCAATGGCTGGGAAACTGATACACT	Os87_lrc4485_aR	GTTTTCCCAATCAAACAAACTTCCAAAC	(TGT)8	(TGT)8	TGT	106	109	106-109	Polymorphic													NHsA8_c9177_3_aR	GTTTCCGAGCATCAATCAGTTTGTTCTA		yam_O_singleton_87-01091-33_1_lrc4485_a	Os87_lrc4485_aL	TGT	3	24	(TGT)	8	(TGT)8			Os87_lrc4485_aL	(TGT)8			Os87_lrc4485_aL	TGT				Os87_lrc4485_a	Os87_lrc4485_aL	106
Oc_6996_aL	CAGTTTTCCCAGTCACGACTTAAATAGTGCTCTTCGGATTGCC	Oc_6996_aR	GTTTTATAGCAAGATGGCTGCCCTGTAT	(CTG)8	(CTG)8	CTG	150	168	150-168	Polymorphic													NHsA8_c9294_2_aR	GTTTATCAGGTACCCTGTTGGACAACTC		yam_O_contig_6996_a	Oc_6996_aL	CTG	3	24	(CTG)	8	(CTG)8			Oc_6996_aL	(CTG)8			Oc_6996_aL	CTG				Oc_6996_a	Oc_6996_aL	150
Oc_1520_aL	CAGTTTTCCCAGTCACGACGTGGGTTTGGTAAAGGGAACTTCT	Oc_1520_aR	GTTTATATTGAAATGCCATACCCACAGC	(CTG)8	(CTG)8	CTG	158	167	158-167	Polymorphic													NHsB9_c12106_2_aR	GTTTCATCTCTTCCGATCTCCTCTTCAC		yam_O_contig_1520_a	Oc_1520_aL	CTG	3	24	(CTG)	8	(CTG)8			Oc_1520_aL	(CTG)8			Oc_1520_aL	CTG				Oc_1520_a	Oc_1520_aL	158
Os87_c11757_aL	CAGTTTTCCCAGTCACGACGAGAAGAGAAACAGCGAACTGAGG	Os87_c11757_aR	GTTTCTCTTGCAAGGACTCTGATGATGA	(AGC)8	(AGC)8	AGC	150	150	150-150	Monomorphic													NHsB9_c12383_2_aR	GTTTTTATTTTCCTTCCTACTGCTCGCC		yam_O_singleton_87-01091-33_1_c11757_a	Os87_c11757_aL	AGC	3	24	(AGC)	8	(AGC)8			Os87_c11757_aL	(AGC)8			Os87_c11757_aL	AGC				Os87_c11757_a	Os87_c11757_aL	150
Oc_1164_aL	CAGTTTTCCCAGTCACGACCACTTTTCTATCAAGCTTTCCTATGTGT	Oc_1164_aR	GTTTGCCATACATCGGATTCAAATAACA	(ATA)8	(ATA)8	ATA	183	183	183-183	Monomorphic													NHsB9_c12502_2_aR	GTTTTGTATTTTGTCTGGCTCTTTGCAG		yam_O_contig_1164_a	Oc_1164_aL	ATA	3	24	(ATA)	8	(ATA)8			Oc_1164_aL	(ATA)8			Oc_1164_aL	ATA				Oc_1164_a	Oc_1164_aL	183
Oc_1164_aL	CAGTTTTCCCAGTCACGACCACTTTTCTATCAAGCTTTCCTATGTGT	Oc_1164_aR	GTTTGCCATACATCGGATTCAAATAACA	(ATA)8	(ATA)8	ATA	183	183	183-183	Monomorphic													NHsB9_c13279_2_aR	GTTTTTTTTGAGTTCTGCTCATGACTGC		yam_O_contig_1164_a	Oc_1164_aL	ATA	3	24	(ATA)	8	(ATA)8			Oc_1164_aL	(ATA)8			Oc_1164_aL	ATA				Oc_1164_a	Oc_1164_aL	183
Os87_lrc4485_aL	CAGTTTTCCCAGTCACGACCAATGGCTGGGAAACTGATACACT	Os87_lrc4485_aR	GTTTTCCCAATCAAACAAACTTCCAAAC	(TGT)8	(TGT)8	TGT	106	109	106-109	Polymorphic													NHc_3210_eR	GTTTGGATTCCGGTAATGGTACATCAACT		yam_O_singleton_87-01091-33_1_lrc4485_a	Os87_lrc4485_aL	TGT	3	24	(TGT)	8	(TGT)8			Os87_lrc4485_aL	(TGT)8			Os87_lrc4485_aL	TGT				Os87_lrc4485_a	Os87_lrc4485_aL	106
Oc_2185_aL	CAGTTTTCCCAGTCACGACTCTCCTTATCTTTCTCATTGCCCA	Oc_2185_aR	GTTTCCTGAGAGGTCTTGGAGAGAAGTG	(GCCACC)4	(GCCACC)4	GCCACC	171	171	171-171	Monomorphic																yam_O_contig_2185_a	Oc_2185_aL	GCCACC	6	24	(GCCACC)	4	(GCCACC)4			Oc_2185_aL	(GCCACC)4			Oc_2185_aL	GCCACC				Oc_2185_a	Oc_2185_aL	171
Oc_1666_aL	CAGTTTTCCCAGTCACGACATTGCTCATCAGGTACGCTTTGTT	Oc_1666_aR	GTTTACCTTCTTGGCATCTCTGCTCTT	(GA)12	(GA)12	GA	143	164	143-164	Polymorphic													NHc_3428cL	CAGTTTTCCCAGTCACGACAGAAGCTCGAGAGATAGGGACAGG		yam_O_contig_1666_a	Oc_1666_aL	GA	2	24	(GA)	12	(GA)12			Oc_1666_aL	(GA)12			Oc_1666_aL	GA				Oc_1666_a	Oc_1666_aL	143
Oc_3771_aL	CAGTTTTCCCAGTCACGACTGCTACTCCCTTCACTTTTATGCC	Oc_3771_aR	GTTTTCTTCTCTTCCTTTATTCCTTCTCTCTG	(TAT)8	(TAT)8	TAT	215	226	215-226	Polymorphic													NHc_1324_aL	CAGTTTTCCCAGTCACGACTAAGGACTTCGCAAAGGACATAGC		yam_O_contig_3771_a	Oc_3771_aL	TAT	3	24	(TAT)	8	(TAT)8			Oc_3771_aL	(TAT)8			Oc_3771_aL	TAT				Oc_3771_a	Oc_3771_aL	215
Oc_3780_bL	CAGTTTTCCCAGTCACGACTGTTCATCTTTATCCCACTCCTCC	Oc_3780_bR	GTTTGGATTCCATAGCTGGTCAAGAAGA	(CTT)8	(CTT)8	CTT	154	161	154-161	Polymorphic													NHc_1817_aL	CAGTTTTCCCAGTCACGACGGATCCTTCATCTGGTAGCTCAAA		yam_O_contig_3780_b	Oc_3780_bL	CTT	3	24	(CTT)	8	(CTT)8			Oc_3780_bL	(CTT)8			Oc_3780_bL	CTT				Oc_3780_b	Oc_3780_bL	154
Oc_2055_bL	CAGTTTTCCCAGTCACGACTTCTTGTTGAGAAGAGATTGGACC	Oc_2055_bR	GTTTAAAGTGTGTACAAATACAAATGACAACA	(AGGATG)4	(AGGATG)4	AGGATG	149	165	149-165	Polymorphic													NHc_3848_aL	CAGTTTTCCCAGTCACGACGCACCTTTTTCATCCCACAAGTAT		yam_O_contig_2055_b	Oc_2055_bL	AGGATG	6	24	(AGGATG)	4	(AGGATG)4			Oc_2055_bL	(AGGATG)4			Oc_2055_bL	AGGATG				Oc_2055_b	Oc_2055_bL	149
Oc_1251_aL	CAGTTTTCCCAGTCACGACAATTCCCGGGATGTGCTCTC	Oc_1251_aR	GTTTCGTGACCTGGCAAGTAGTATCCC	(CTC)8	(CTC)8	CTC	0	0	-	Didn't Work													NHc_4784_aL	CAGTTTTCCCAGTCACGACGGTTCACCTCCTTCACTAAATCCC		yam_O_contig_1251_a	Oc_1251_aL	CTC	3	24	(CTC)	8	(CTC)8			Oc_1251_aL	(CTC)8			Oc_1251_aL	CTC				Oc_1251_a	Oc_1251_aL
Os87_c6490_aL	CAGTTTTCCCAGTCACGACAAGAGAACCATGGGAGCTTGTTC	Os87_c6490_aR	GTTTCTATAGCAATCGGGGAATTCAGG	(CCTTCG)4	(CCTTCG)4	CCTTCG	150	150	150-150	Monomorphic													NHc_5720_aL	CAGTTTTCCCAGTCACGACACAATTCAACCTATCAAGTTTTGCAT		yam_O_singleton_87-01091-33_1_c6490_a	Os87_c6490_aL	CCTTCG	6	24	(CCTTCG)	4	(CCTTCG)4			Os87_c6490_aL	(CCTTCG)4			Os87_c6490_aL	CCTTCG				Os87_c6490_a	Os87_c6490_aL	150
Oc_2055_bL	CAGTTTTCCCAGTCACGACTTCTTGTTGAGAAGAGATTGGACC	Oc_2055_bR	GTTTAAAGTGTGTACAAATACAAATGACAACA	(AGGATG)4	(AGGATG)4	AGGATG	149	165	149-165	Polymorphic													NHs87_c11990_aL	CAGTTTTCCCAGTCACGACGAGGAAGAGGACGAGGAGGAAG		yam_O_contig_2055_b	Oc_2055_bL	AGGATG	6	24	(AGGATG)	4	(AGGATG)4			Oc_2055_bL	(AGGATG)4			Oc_2055_bL	AGGATG				Oc_2055_b	Oc_2055_bL	149
Oc_6027_aL	CAGTTTTCCCAGTCACGACAATTCAACAGCCAGCTACCTCATC	Oc_6027_aR	GTTTCAACATCATGGAAATCCAACAAGA	(TCT)8	(TCT)8	TCT	145	167	145-167	Polymorphic													NHs87_lrc3986_aL	CAGTTTTCCCAGTCACGACGATATTTGGTGCTGGGTATGGAAG		yam_O_contig_6027_a	Oc_6027_aL	TCT	3	24	(TCT)	8	(TCT)8			Oc_6027_aL	(TCT)8			Oc_6027_aL	TCT				Oc_6027_a	Oc_6027_aL	145
Oc_483_aL	CAGTTTTCCCAGTCACGACAGAACAACCCAATTCCCAGATACA	Oc_483_aR	GTTTGAGAAAGCAACGGCAAAGAAGAG	(AAG)8	(AAG)8	AAG	149	149	149-149	Monomorphic													NHsA8_c11104_2_aL	CAGTTTTCCCAGTCACGACATTTTTCTTCATCGAGCGCAAATA		yam_O_contig_483_a	Oc_483_aL	AAG	3	24	(AAG)	8	(AAG)8			Oc_483_aL	(AAG)8			Oc_483_aL	AAG				Oc_483_a	Oc_483_aL	149
Oc_908_aL	CAGTTTTCCCAGTCACGACCTCCTCTTGACTCGGTATCACGTT	Oc_908_aR	GTTTAAACCCGACTAATTACATGTGTGGA	(CT)12	(CT)12	CT	108	108	108-108	Monomorphic													NHsA8_c14662_2_aL	CAGTTTTCCCAGTCACGACAGGTATGCGAATTCTTGAAACCAA		yam_O_contig_908_a	Oc_908_aL	CT	2	24	(CT)	12	(CT)12			Oc_908_aL	(CT)12			Oc_908_aL	CT				Oc_908_a	Oc_908_aL	108
OsA8_c2962_23_aL	CAGTTTTCCCAGTCACGACTTGGTAAAACTTAAAGCTGGAGATG	OsA8_c2962_23_aR	GTTTTCAGCAAAAACCATCTATTCATTG	(TGT)8	(TGT)8	TGT	141	148	141-148	Polymorphic													NHsA8_c8784_3_aL	CAGTTTTCCCAGTCACGACGAGGTGCCGAGGAAGACATTC		yam_O_singleton_A328-33_8_c2962_23_a	OsA8_c2962_23_aL	TGT	3	24	(TGT)	8	(TGT)8			OsA8_c2962_23_aL	(TGT)8			OsA8_c2962_23_aL	TGT				OsA8_c2962_23_a	OsA8_c2962_23_aL	141
Oc_2804_aL	CAGTTTTCCCAGTCACGACAGGCCTGATGAAGATGAAGGTATG	Oc_2804_aR	GTTTAAAAAGACAACCAGACAGAAGACAGA	(TTC)8	(TTC)8	TTC	113	158	113-158	Polymorphic													NHsB9_c11075_2_aL	CAGTTTTCCCAGTCACGACAGTGTGGCCGAGTCTTCGAG		yam_O_contig_2804_a	Oc_2804_aL	TTC	3	24	(TTC)	8	(TTC)8			Oc_2804_aL	(TTC)8			Oc_2804_aL	TTC				Oc_2804_a	Oc_2804_aL	113
Oc_6128_aL	CAGTTTTCCCAGTCACGACCTGCTGAGAAGTCTCCAAGGAAGT	Oc_6128_aR	GTTTTCATTCCACCATGACATCTTCAGT	(GCAAAG)4	(GCAAAG)4	GCAAAG	0	0	-	Didn't Work													NHsB9_c15621_2_aL	CAGTTTTCCCAGTCACGACTCTTGTGATAACCAGGAAGGCAAC		yam_O_contig_6128_a	Oc_6128_aL	GCAAAG	6	24	(GCAAAG)	4	(GCAAAG)4			Oc_6128_aL	(GCAAAG)4			Oc_6128_aL	GCAAAG				Oc_6128_a	Oc_6128_aL
Oc_4918_aL	CAGTTTTCCCAGTCACGACATCATGGTCAGTGATGCCATTTC	Oc_4918_aR	GTTTTGCCATTTCTTCTAGACAAGGAGG	(TGA)7	(TGA)7	TGA	0	0	-	Didn't Work													NHsB9_c3076_10_aL	CAGTTTTCCCAGTCACGACAGAAAGAACCCAAGACGGGCTAT		yam_O_contig_4918_a	Oc_4918_aL	TGA	3	21	(TGA)	7	(TGA)7			Oc_4918_aL	(TGA)7			Oc_4918_aL	TGA				Oc_4918_a	Oc_4918_aL
Oc_7219_aL	CAGTTTTCCCAGTCACGACGTGATCGTCTTTTCATCGACTGG	Oc_7219_aR	GTTTATAGCTCCATGGGGACAAGGAT	(AGC)7	(AGC)7	AGC	135	138	135-138	Polymorphic													NHc_4998cL	CAGTTTTCCCAGTCACGACCTTTGGTTGTTTGTTTGCTTCCTT		yam_O_contig_7219_a	Oc_7219_aL	AGC	3	21	(AGC)	7	(AGC)7			Oc_7219_aL	(AGC)7			Oc_7219_aL	AGC				Oc_7219_a	Oc_7219_aL	135
OsB9_c3043_10_aL	CAGTTTTCCCAGTCACGACCTGGGTTTTCTCTTGAAGGATTGA	OsB9_c3043_10_aR	GTTTCCAAAGTTATCACCTTTCTGGAACTT	(CTT)7	(CTT)7	CTT	159	159	159-159	Monomorphic													NHc_1504_aL	CAGTTTTCCCAGTCACGACAGATCTGAGCCTTTTCCCTCTTTA		yam_O_singleton_B310-33_9_c3043_10_a	OsB9_c3043_10_aL	CTT	3	21	(CTT)	7	(CTT)7			OsB9_c3043_10_aL	(CTT)7			OsB9_c3043_10_aL	CTT				OsB9_c3043_10_a	OsB9_c3043_10_aL	159
Oc_2949_aL	CAGTTTTCCCAGTCACGACATTCATACTCACACGCCACACACT	Oc_2949_aR	GTTTGTGGAAAGTTCTGGAACGAAATTG	(AAT)7	(AAT)7	AAT	159	159	159-159	Monomorphic													NHc_3467_aL	CAGTTTTCCCAGTCACGACTGGGACATTCTGCCTCTATTCTTC		yam_O_contig_2949_a	Oc_2949_aL	AAT	3	21	(AAT)	7	(AAT)7			Oc_2949_aL	(AAT)7			Oc_2949_aL	AAT				Oc_2949_a	Oc_2949_aL	159
Oc_727_aL	CAGTTTTCCCAGTCACGACCCCCATGTGTTTTTCTAGATCAGG	Oc_727_aR	GTTTACAAGTGAAATTCCAAACCAGAGG	(GAT)7	(GAT)7	GAT	0	0	-	Didn't Work													NHc_4375_aL	CAGTTTTCCCAGTCACGACTGTGTCTATTCTTTAAGCTGATGATGG		yam_O_contig_727_a	Oc_727_aL	GAT	3	21	(GAT)	7	(GAT)7			Oc_727_aL	(GAT)7			Oc_727_aL	GAT				Oc_727_a	Oc_727_aL
Os87_lrc4450_aL	CAGTTTTCCCAGTCACGACTTTCTGACTGATCAAGCCCTTTTC	Os87_lrc4450_aR	GTTTGGTCTCTTCTCCAGCTCTGTTGTG	(CCA)7	(CCA)7	CCA	0	0	-	Didn't Work													NHc_4781_aL	CAGTTTTCCCAGTCACGACCTGAGATGGGCTGAGAGATTTTGT		yam_O_singleton_87-01091-33_1_lrc4450_a	Os87_lrc4450_aL	CCA	3	21	(CCA)	7	(CCA)7			Os87_lrc4450_aL	(CCA)7			Os87_lrc4450_aL	CCA				Os87_lrc4450_a	Os87_lrc4450_aL
Oc_2868_aL	CAGTTTTCCCAGTCACGACTCTCGCAAACGCATTAATCTGATA	Oc_2868_aR	GTTTGGAGAGCTCAATCTTCCTGCTTCT	(AAT)7	(AAT)7	AAT	159	159	159-159	Monomorphic													NHc_5011_bL	CAGTTTTCCCAGTCACGACGTGCTTTGCACGTGAGGGTATT		yam_O_contig_2868_a	Oc_2868_aL	AAT	3	21	(AAT)	7	(AAT)7			Oc_2868_aL	(AAT)7			Oc_2868_aL	AAT				Oc_2868_a	Oc_2868_aL	159
Oc_1923_bL	CAGTTTTCCCAGTCACGACTCCGACAACGAATGCCTCTATACT	Oc_1923_bR	GTTTACAACAACAGCAGCAACAAGAGTC	(TGA)7	(TGA)7	TGA	160	160	160-160	Monomorphic													NHc_6846_aL	CAGTTTTCCCAGTCACGACGGCATATTTCCTGGGTTTTCATTA		yam_O_contig_1923_b	Oc_1923_bL	TGA	3	21	(TGA)	7	(TGA)7			Oc_1923_bL	(TGA)7			Oc_1923_bL	TGA				Oc_1923_b	Oc_1923_bL	160
Oc_1893_aL	CAGTTTTCCCAGTCACGACATCCGTTTCCGTTTTCGGATT	Oc_1893_aR	GTTTAGATGTCCGATATCAAGCCCTCTC	(CCG)7	(CCG)7	CCG	166	180	166-180	Polymorphic													NHs87_c11619_aL	CAGTTTTCCCAGTCACGACCAGTTCCGCTGTTGGTTCCTTAC		yam_O_contig_1893_a	Oc_1893_aL	CCG	3	21	(CCG)	7	(CCG)7			Oc_1893_aL	(CCG)7			Oc_1893_aL	CCG				Oc_1893_a	Oc_1893_aL	166
Oc_1854_aL	CAGTTTTCCCAGTCACGACGAACAATGCTTCGAGGAATAGGAA	Oc_1854_aR	GTTTGCCACCACTTCCATTGTTTAGAGT	(TGG)7	(TGG)7	TGG	160	166	160-166	Polymorphic													NHs87_lrc3624_aL	CAGTTTTCCCAGTCACGACTCCTCTTTATTCTCCCCACAAACA		yam_O_contig_1854_a	Oc_1854_aL	TGG	3	21	(TGG)	7	(TGG)7			Oc_1854_aL	(TGG)7			Oc_1854_aL	TGG				Oc_1854_a	Oc_1854_aL	160
Oc_2863_bL	CAGTTTTCCCAGTCACGACTCTTCATCTTTTTCTTCTGTTAGGTGC	Oc_2863_bR	GTTTTGTTTTGAGTGTACTCCATTTATTTCCA	(CTT)7	(CTT)7	CTT	265	286	265-286	Polymorphic													NHsA8_c12061_3_aL	CAGTTTTCCCAGTCACGACAACGTTCCACTTCGTTCTTGTTTC		yam_O_contig_2863_b	Oc_2863_bL	CTT	3	21	(CTT)	7	(CTT)7			Oc_2863_bL	(CTT)7			Oc_2863_bL	CTT				Oc_2863_b	Oc_2863_bL	265
OsA8_c9740_2_aL	CAGTTTTCCCAGTCACGACAGACCAAGGCTAAGGAAATCCAAG	OsA8_c9740_2_aR	GTTTCCCATTTCCAACCTCAAGGATTAT	(CTT)7	(CTT)7	CTT	122	122	122-122	Monomorphic													NHsA8_c13007_2_aL	CAGTTTTCCCAGTCACGACTTAAAGGGTAACTGCTGCACACAA		yam_O_singleton_A328-33_8_c9740_2_a	OsA8_c9740_2_aL	CTT	3	21	(CTT)	7	(CTT)7			OsA8_c9740_2_aL	(CTT)7			OsA8_c9740_2_aL	CTT				OsA8_c9740_2_a	OsA8_c9740_2_aL	122
Oc_6261_bL	CAGTTTTCCCAGTCACGACATCAGGGGTAGATTGGGAAGACTC	Oc_6261_bR	GTTTAAAATCAAAAACCCACTAAAATCATCA	(AAT)7	(AAT)7	AAT	169	176	169-176	Polymorphic													NHsA8_c13522_2_aL	CAGTTTTCCCAGTCACGACAAGATTGACTCAACACTTTTTGTTTG		yam_O_contig_6261_b	Oc_6261_bL	AAT	3	21	(AAT)	7	(AAT)7			Oc_6261_bL	(AAT)7			Oc_6261_bL	AAT				Oc_6261_b	Oc_6261_bL	169
Oc_4411_aL	CAGTTTTCCCAGTCACGACAACCCTAACCCTAGTTTCGGTGAA	Oc_4411_aR	GTTTTATCCCTCCAGCATCACCTCAC	(AAG)7	(AAG)7	AAG	179	179	179-179	Monomorphic													NHsA8_c3256_6_aL	CAGTTTTCCCAGTCACGACCTCCTCCTCCTGATCTTCCTGAAT		yam_O_contig_4411_a	Oc_4411_aL	AAG	3	21	(AAG)	7	(AAG)7			Oc_4411_aL	(AAG)7			Oc_4411_aL	AAG				Oc_4411_a	Oc_4411_aL	179
Oc_4347_aL	CAGTTTTCCCAGTCACGACCTGCTATCACTGACAAGAAGGCAC	Oc_4347_aR	GTTTCAGATGATTTGATAGCTGCTGCAC	(TGA)7	(TGA)7	TGA	0	0	-	Didn't Work													NHsA8_c4030_10_aL	CAGTTTTCCCAGTCACGACCCAAAGTCATATCTTTATTGCAGGG		yam_O_contig_4347_a	Oc_4347_aL	TGA	3	21	(TGA)	7	(TGA)7			Oc_4347_aL	(TGA)7			Oc_4347_aL	TGA				Oc_4347_a	Oc_4347_aL
Os87_lrc7943_aL	CAGTTTTCCCAGTCACGACCATGTTAGCTTTGGCTTTGATGTG	Os87_lrc7943_aR	GTTTGCTCGGCAACTTATTAATGGTGAG	(ACC)7	(ACC)7	ACC	166	169	166-169	Polymorphic													NHsA8_c9379_3_aL	CAGTTTTCCCAGTCACGACTTAGAGCATTTGCCAATCAAGGAT		yam_O_singleton_87-01091-33_1_lrc7943_a	Os87_lrc7943_aL	ACC	3	21	(ACC)	7	(ACC)7			Os87_lrc7943_aL	(ACC)7			Os87_lrc7943_aL	ACC				Os87_lrc7943_a	Os87_lrc7943_aL	166
Os87_lrc6408_aL	CAGTTTTCCCAGTCACGACAGGTGAAAGTTGGAGAGGTTTGTG	Os87_lrc6408_aR	GTTTGACATCTGATTACCTTCTCCTTCCC	(TGG)7	(TGG)7	TGG	178	184	178-184	Polymorphic													NHsA8_c9564_2_aL	CAGTTTTCCCAGTCACGACAAAGATCTTGTCTTTTGATCTGTGAGC		yam_O_singleton_87-01091-33_1_lrc6408_a	Os87_lrc6408_aL	TGG	3	21	(TGG)	7	(TGG)7			Os87_lrc6408_aL	(TGG)7			Os87_lrc6408_aL	TGG				Os87_lrc6408_a	Os87_lrc6408_aL	178
Oc_1799_aL	CAGTTTTCCCAGTCACGACAAAATCAGCTAAGGCAGTGTCTTTATTC	Oc_1799_aR	GTTTAGTTACAAAACAACAACGCCAACA	(TTG)7	(TTG)7	TTG	104	118	104-118	Polymorphic													NHsA8_c9852_2_aL	CAGTTTTCCCAGTCACGACTGAATGAACATATGGATGAAAGGG		yam_O_contig_1799_a	Oc_1799_aL	TTG	3	21	(TTG)	7	(TTG)7			Oc_1799_aL	(TTG)7			Oc_1799_aL	TTG				Oc_1799_a	Oc_1799_aL	104
Os87_lrc3745_aL	CAGTTTTCCCAGTCACGACTATTATCGAGAACAAAGGCCTGGA	Os87_lrc3745_aR	GTTTCTTCCATTTCTCTGGCTGAACATC	(TGG)7	(TGG)7	TGG	179	179	179-179	Monomorphic													NHsB9_c10419_2_aL	CAGTTTTCCCAGTCACGACAAAGTGAAAACAGGCATGGAAACT		yam_O_singleton_87-01091-33_1_lrc3745_a	Os87_lrc3745_aL	TGG	3	21	(TGG)	7	(TGG)7			Os87_lrc3745_aL	(TGG)7			Os87_lrc3745_aL	TGG				Os87_lrc3745_a	Os87_lrc3745_aL	179
Os87_lrc5487_aL	CAGTTTTCCCAGTCACGACGAGTGTTTTGACGAAATGGTCGAT	Os87_lrc5487_aR	GTTTGAACCACATCCTACTACAATGAACACAC	(GGT)7	(GGT)7	GGT	177	180	177-180	Polymorphic													NHsB9_c13489_2_aL	CAGTTTTCCCAGTCACGACTCCTGTTATGTTTGCTTTTGACATTT		yam_O_singleton_87-01091-33_1_lrc5487_a	Os87_lrc5487_aL	GGT	3	21	(GGT)	7	(GGT)7			Os87_lrc5487_aL	(GGT)7			Os87_lrc5487_aL	GGT				Os87_lrc5487_a	Os87_lrc5487_aL	177
Oc_304_aL	CAGTTTTCCCAGTCACGACGAGGAGGCATGAATTGTAAACCAG	Oc_304_aR	GTTTTGAATTTCACTGATCATCACTTTTTCA	(TCT)7	(TCT)7	TCT	123	130	123-130	Polymorphic													NHsB9_c13560_2_aL	CAGTTTTCCCAGTCACGACCTCTTCTCGCTGCGATCCTCT		yam_O_contig_304_a	Oc_304_aL	TCT	3	21	(TCT)	7	(TCT)7			Oc_304_aL	(TCT)7			Oc_304_aL	TCT				Oc_304_a	Oc_304_aL	123
Oc_5888_aL	CAGTTTTCCCAGTCACGACGAAATGATGGTGAAATAAGGCTCAA	Oc_5888_aR	GTTTCATCAACATTCAACATGGAATTAAGAC	(TGT)7	(TGT)7	TGT	183	183	183-183	Monomorphic													NHsB9_c14836_2_aL	CAGTTTTCCCAGTCACGACATTTGTAAGTCGAACTGGTCTGGC		yam_O_contig_5888_a	Oc_5888_aL	TGT	3	21	(TGT)	7	(TGT)7			Oc_5888_aL	(TGT)7			Oc_5888_aL	TGT				Oc_5888_a	Oc_5888_aL	183
Oc_3776_aL	CAGTTTTCCCAGTCACGACAATTCCCGGGACTCAGCAAG	Oc_3776_aR	GTTTCTCCATCATCGTCGGATACAGAG	(AGA)7	(AGA)7	AGA	0	0	-	Didn't Work													NHsB9_c15008_2_aL	CAGTTTTCCCAGTCACGACGCCGTAAATGCAATAACATTAACTTCA		yam_O_contig_3776_a	Oc_3776_aL	AGA	3	21	(AGA)	7	(AGA)7			Oc_3776_aL	(AGA)7			Oc_3776_aL	AGA				Oc_3776_a	Oc_3776_aL
Oc_5569_aL	CAGTTTTCCCAGTCACGACCGTCCGTTTTGTATCATCATCGT	Oc_5569_aR	GTTTTTTACACGTCATCACTCCATCACC	(TAA)7	(TAA)7	TAA	169	178	169-178	Polymorphic													NHsB9_c15281_2_aL	CAGTTTTCCCAGTCACGACGGTGAGGTGGAACTCTAAACCAAA		yam_O_contig_5569_a	Oc_5569_aL	TAA	3	21	(TAA)	7	(TAA)7			Oc_5569_aL	(TAA)7			Oc_5569_aL	TAA				Oc_5569_a	Oc_5569_aL	169
Oc_6095_aL	CAGTTTTCCCAGTCACGACTTCCCCTTCTATGTCAGAAAACACA	Oc_6095_aR	GTTTTATGCGATGTTGAGTCAGGTGAAC	(TTA)7	(TTA)7	TTA	181	184	181-184	Polymorphic													NHsB9_c5688_4_aL	CAGTTTTCCCAGTCACGACAAATGTTTGAGCAGGATGGATTGT		yam_O_contig_6095_a	Oc_6095_aL	TTA	3	21	(TTA)	7	(TTA)7			Oc_6095_aL	(TTA)7			Oc_6095_aL	TTA				Oc_6095_a	Oc_6095_aL	181
OsB9_c11806_4_aL	CAGTTTTCCCAGTCACGACCCTGGTCTTCTACGTCACCTTCTC	OsB9_c11806_4_aR	GTTTTGGTGAGTTCTTCTCCAAGATTGA	(AAG)7	(AAG)7	AAG	140	140	140-140	Monomorphic													NHc_1778_aL	CAGTTTTCCCAGTCACGACTGATGATGAGAAGAAGAGCGAGAA		yam_O_singleton_B310-33_9_c11806_4_a	OsB9_c11806_4_aL	AAG	3	21	(AAG)	7	(AAG)7			OsB9_c11806_4_aL	(AAG)7			OsB9_c11806_4_aL	AAG				OsB9_c11806_4_a	OsB9_c11806_4_aL	140
Os87_c3563_aL	CAGTTTTCCCAGTCACGACGATTCCTTCCTTCCATTCCAAGTC	Os87_c3563_aR	GTTTCACTGGGATGGAGAAATCCCT	(TCT)7	(TCT)7	TCT	156	168	156-168	Polymorphic													NHc_268_aL	CAGTTTTCCCAGTCACGACATCTGACGGGAAGCCAATCAT		yam_O_singleton_87-01091-33_1_c3563_a	Os87_c3563_aL	TCT	3	21	(TCT)	7	(TCT)7			Os87_c3563_aL	(TCT)7			Os87_c3563_aL	TCT				Os87_c3563_a	Os87_c3563_aL	156
Oc_5017_aL	CAGTTTTCCCAGTCACGACGCAAAACCCTCCTGTCCTCAA	Oc_5017_aR	GTTTCGAATTAGTCCTTGCATTGTTTCC	(TCT)7	(TCT)7	TCT	0	0	-	Didn't Work													NHc_3698_aL	CAGTTTTCCCAGTCACGACAAATGAGCAATGACAATGAACGAA		yam_O_contig_5017_a	Oc_5017_aL	TCT	3	21	(TCT)	7	(TCT)7			Oc_5017_aL	(TCT)7			Oc_5017_aL	TCT				Oc_5017_a	Oc_5017_aL
Oc_5405_bL	CAGTTTTCCCAGTCACGACACCTTTACACACCGGAAACACACT	Oc_5405_bR	GTTTAGTGTTGAACTGAAGTGTGGCTGT	(CAC)7	(CAC)7	CAC	0	0	-	Didn't Work													NHc_3786_aL	CAGTTTTCCCAGTCACGACCCAGTATTGAGCAGTAACAGCAGC		yam_O_contig_5405_b	Oc_5405_bL	CAC	3	21	(CAC)	7	(CAC)7			Oc_5405_bL	(CAC)7			Oc_5405_bL	CAC				Oc_5405_b	Oc_5405_bL
Os87_c3307_aL	CAGTTTTCCCAGTCACGACCCTCTTTCTCTCCAAACCATCAAA	Os87_c3307_aR	GTTTTGGTTGTGCTTATCCTCTTCTTCC	(GGT)7	(GGT)7	GGT	181	185	181-185	Polymorphic													NHc_7097_aL	CAGTTTTCCCAGTCACGACTCGTCTCCCTTTGATACCTCTTTG		yam_O_singleton_87-01091-33_1_c3307_a	Os87_c3307_aL	GGT	3	21	(GGT)	7	(GGT)7			Os87_c3307_aL	(GGT)7			Os87_c3307_aL	GGT				Os87_c3307_a	Os87_c3307_aL	181
Oc_4035_aL	CAGTTTTCCCAGTCACGACGCAATGCAATGCTTGTCATAGATA	Oc_4035_aR	GTTTTCTTTGGCCTTTAATAATTTGAGCA	(TTA)7	(TTA)7	TTA	177	234	177-234	Polymorphic													NHs87_c10771_aL	CAGTTTTCCCAGTCACGACCCTCTTCCGCACCACTCTCTTAG		yam_O_contig_4035_a	Oc_4035_aL	TTA	3	21	(TTA)	7	(TTA)7			Oc_4035_aL	(TTA)7			Oc_4035_aL	TTA				Oc_4035_a	Oc_4035_aL	177
Oc_4895_aL	CAGTTTTCCCAGTCACGACCTGAATTCTTGGTCTTTGGCGAT	Oc_4895_aR	GTTTTCAAAAGTTTTCGTCAAGAACGGT	(GAG)7	(GAG)7	GAG	181	181	181-181	Monomorphic													NHs87_c5683_aL	CAGTTTTCCCAGTCACGACAAGCTTAGAGCAACGAGAGCTCAA		yam_O_contig_4895_a	Oc_4895_aL	GAG	3	21	(GAG)	7	(GAG)7			Oc_4895_aL	(GAG)7			Oc_4895_aL	GAG				Oc_4895_a	Oc_4895_aL	181
Oc_809_aL	CAGTTTTCCCAGTCACGACAAGCATTCTACCATTGTGTGCAAG	Oc_809_aR	GTTTAGTAGCACAACAACATCATAGGCG	(ATGCA)4	(ATGCA)4	ATGCA	170	178	170-178	Polymorphic													NHs87_c940_aL	CAGTTTTCCCAGTCACGACTGTCACCAGGGCTTTTATCTTTGT		yam_O_contig_809_a	Oc_809_aL	ATGCA	5	20	(ATGCA)	4	(ATGCA)4			Oc_809_aL	(ATGCA)4			Oc_809_aL	ATGCA				Oc_809_a	Oc_809_aL	170
Oc_1965_aL	CAGTTTTCCCAGTCACGACAGCCTTCAACCTCATCTTAAAGCA	Oc_1965_aR	GTTTGGTAGTAGCATTGTTCCTCTAGTGGGT	(AT)10	(AT)10	AT	121	121	121-121	Monomorphic													NHs87_lrc7540_aL	CAGTTTTCCCAGTCACGACGCAACGAGGACATCAACAATAACA		yam_O_contig_1965_a	Oc_1965_aL	AT	2	20	(AT)	10	(AT)10			Oc_1965_aL	(AT)10			Oc_1965_aL	AT				Oc_1965_a	Oc_1965_aL	121
Oc_2019_aL	CAGTTTTCCCAGTCACGACCCCTAAATATCAATCACTCCCAAAA	Oc_2019_aR	GTTTGGATGCATTATCCAACAGTCAAGA	(TA)10	(TA)10	TA	147	162	147-162	Polymorphic													NHs87_lrc9940_aL	CAGTTTTCCCAGTCACGACACCTGGAGTGACCAAACAGAAGAG		yam_O_contig_2019_a	Oc_2019_aL	TA	2	20	(TA)	10	(TA)10			Oc_2019_aL	(TA)10			Oc_2019_aL	TA				Oc_2019_a	Oc_2019_aL	147
Oc_4329_aL	CAGTTTTCCCAGTCACGACTCCCAACTAAATTAGAAAGGAACTGC	Oc_4329_aR	GTTTTTTTCTCTGTTCATTCATGTGCTG	(ATAC)5	(ATAC)5	ATAC	181	206	181-206	Polymorphic													NHc_3428cR	GTTTTGACAATCAGGACAATAGCAATACCA		yam_O_contig_4329_a	Oc_4329_aL	ATAC	4	20	(ATAC)	5	(ATAC)5			Oc_4329_aL	(ATAC)5			Oc_4329_aL	ATAC				Oc_4329_a	Oc_4329_aL	181
Oc_2640_aL	CAGTTTTCCCAGTCACGACTCAAAAGCTCAAAACTTCACTCCC	Oc_2640_aR	GTTTCTATTCTTCAATCCCCCACAGAGA	(GGTT)5	(GGTT)5	GGTT	143	143	143-143	Monomorphic													NHc_1324_aR	GTTTTAGTTCCGGGTACCAGAAGATTTG		yam_O_contig_2640_a	Oc_2640_aL	GGTT	4	20	(GGTT)	5	(GGTT)5			Oc_2640_aL	(GGTT)5			Oc_2640_aL	GGTT				Oc_2640_a	Oc_2640_aL	143
Oc_525_aL	CAGTTTTCCCAGTCACGACTCTCTGCTCTGCTACTTGTGCTTC	Oc_525_aR	GTTTCAAGGGAATTGGTCATACATCCAT	(TGTA)5	(TGTA)5	TGTA	104	108	104-108	Polymorphic													NHc_1817_aR	GTTTGACCGGCTCCATGATTGTCTT		yam_O_contig_525_a	Oc_525_aL	TGTA	4	20	(TGTA)	5	(TGTA)5			Oc_525_aL	(TGTA)5			Oc_525_aL	TGTA				Oc_525_a	Oc_525_aL	104
Oc_93_aL	CAGTTTTCCCAGTCACGACGACCGCCTCTGCAAGATTTATTAC	Oc_93_aR	GTTTCTACGGCCTATGTCTGTTGTGAGA	(AT)10	(AT)10	AT	176	205	176-205	Polymorphic													NHc_3848_aR	GTTTAAATTCACAATTGGGAGGAATTGA		yam_O_contig_93_a	Oc_93_aL	AT	2	20	(AT)	10	(AT)10			Oc_93_aL	(AT)10			Oc_93_aL	AT				Oc_93_a	Oc_93_aL	176
Oc_7063_bL	CAGTTTTCCCAGTCACGACACCAAACCTCTTTCCAGTTTCCTC	Oc_7063_bR	GTTTCACCTTAGTTCTTGCCATCGAGTC	(GT)10	(GT)10	GT	155	161	155-161	Polymorphic													NHc_4784_aR	GTTTCGAAAGAGAAAAAGAGATCGTCCA		yam_O_contig_7063_b	Oc_7063_bL	GT	2	20	(GT)	10	(GT)10			Oc_7063_bL	(GT)10			Oc_7063_bL	GT				Oc_7063_b	Oc_7063_bL	155
Oc_1980_aL	CAGTTTTCCCAGTCACGACGCTTTTAAGGGGAGAAAGCAAGAC	Oc_1980_aR	GTTTAAATCCTTGAACTCCCTTTTCCAG	(AAAG)5	(AAAG)5	AAAG	99	99	99-99	Monomorphic													NHc_5720_aR	GTTTTGATCATTTGTTTTGTGAATTGAGG		yam_O_contig_1980_a	Oc_1980_aL	AAAG	4	20	(AAAG)	5	(AAAG)5			Oc_1980_aL	(AAAG)5			Oc_1980_aL	AAAG				Oc_1980_a	Oc_1980_aL	99
Oc_6858_aL	CAGTTTTCCCAGTCACGACAAGACTTTGTTCAGGCTGCAATTC	Oc_6858_aR	GTTTAGACCCAGAGGCCAAGTAGTTTCT	(TA)10	(TA)10	TA	169	185	169-185	Polymorphic													NHs87_c11990_aR	GTTTTGCCGAAAGAAAGAGAAGAGAGAA		yam_O_contig_6858_a	Oc_6858_aL	TA	2	20	(TA)	10	(TA)10			Oc_6858_aL	(TA)10			Oc_6858_aL	TA				Oc_6858_a	Oc_6858_aL	169
Oc_274_aL	CAGTTTTCCCAGTCACGACTTACGTACCAAAACCCACAACTTC	Oc_274_aR	GTTTAATTAATTAAACAACGCGCGAC	(TGCA)5	(TGCA)5	TGCA	0	0	-	Didn't Work													NHs87_lrc3986_aR	GTTTCATTCAAAGTCTCAGTGACCACCA		yam_O_contig_274_a	Oc_274_aL	TGCA	4	20	(TGCA)	5	(TGCA)5			Oc_274_aL	(TGCA)5			Oc_274_aL	TGCA				Oc_274_a	Oc_274_aL
Oc_917_aL	CAGTTTTCCCAGTCACGACCGAAAAATTCGGGGACAAAAA	Oc_917_aR	GTTTATGAGCGCCTACCAGTGAAGAC	(TCATC)4	(TCATC)4	TCATC	142	152	142-152	Polymorphic													NHsA8_c11104_2_aR	GTTTTGGTTTTCCATATGTTTTCCATTCA		yam_O_contig_917_a	Oc_917_aL	TCATC	5	20	(TCATC)	4	(TCATC)4			Oc_917_aL	(TCATC)4			Oc_917_aL	TCATC				Oc_917_a	Oc_917_aL	142
Oc_6682_aL	CAGTTTTCCCAGTCACGACTGGTAAATGAAAACACTATTGACAGAGC	Oc_6682_aR	GTTTCTGACCAGCTTCAAAGATGACAAT	(CACAA)4	(CACAA)4	CACAA	138	142	138-142	Polymorphic													NHsA8_c14662_2_aR	GTTTACACAGTAATCCGAAGGCTATGCT		yam_O_contig_6682_a	Oc_6682_aL	CACAA	5	20	(CACAA)	4	(CACAA)4			Oc_6682_aL	(CACAA)4			Oc_6682_aL	CACAA				Oc_6682_a	Oc_6682_aL	138
Oc_815_aL	CAGTTTTCCCAGTCACGACGGTGGAGGAAGCTCATACACTGTC	Oc_815_aR	GTTTTTTTAGGTCCTCGCCGTTAATGAT	(TA)10	(TA)10	TA	0	0	-	Didn't Work													NHsA8_c8784_3_aR	GTTTCTCGCGGATTTGAATAGATGTTCT		yam_O_contig_815_a	Oc_815_aL	TA	2	20	(TA)	10	(TA)10			Oc_815_aL	(TA)10			Oc_815_aL	TA				Oc_815_a	Oc_815_aL
Oc_148_aL	CAGTTTTCCCAGTCACGACTGTTGGTGTTGATTAAGAGTAGCGG	Oc_148_aR	GTTTCCAGTACAGAGCCATTCCATTCAT	(AAGTG)4	(AAGTG)4	AAGTG	169	169	169-169	Monomorphic													NHsB9_c11075_2_aR	GTTTGAGATGAAGGGAAGGGACGAC		yam_O_contig_148_a	Oc_148_aL	AAGTG	5	20	(AAGTG)	4	(AAGTG)4			Oc_148_aL	(AAGTG)4			Oc_148_aL	AAGTG				Oc_148_a	Oc_148_aL	169
Oc_81_aL	CAGTTTTCCCAGTCACGACGGGATTAGTGTCAAGCTGAGTGGT	Oc_81_aR	GTTTCATGCAAATAGAAACCAACACCAA	(AG)10	(AG)10	AG	131	147	131-147	Polymorphic													NHsB9_c15621_2_aR	GTTTTTGCCACCTTGCACCTATAAAATC		yam_O_contig_81_a	Oc_81_aL	AG	2	20	(AG)	10	(AG)10			Oc_81_aL	(AG)10			Oc_81_aL	AG				Oc_81_a	Oc_81_aL	131
Oc_441_aL	CAGTTTTCCCAGTCACGACGCTGATTGGTCCTCACAGTACTAGC	Oc_441_aR	GTTTAGGAAACATAGCCAGATTAGCAACA	(TTTAT)4	(TTTAT)4	TTTAT	141	146	141-146	Polymorphic													NHsB9_c3076_10_aR	GTTTTTCAGCCTTCAACCTTGTTTTGAT		yam_O_contig_441_a	Oc_441_aL	TTTAT	5	20	(TTTAT)	4	(TTTAT)4			Oc_441_aL	(TTTAT)4			Oc_441_aL	TTTAT				Oc_441_a	Oc_441_aL	141
Os87_c4651_aL	CAGTTTTCCCAGTCACGACTGGAGCTCTTCTTGGGATGTTTAT	Os87_c4651_aR	GTTTCAAACAACACAACTCCATCAATCA	(TGTTG)4	(TGTTG)4	TGTTG	134	139	134-139	Polymorphic													NHc_4998cR	GTTTCATACATATTCAATTGATGGACTCACAA		yam_O_singleton_87-01091-33_1_c4651_a	Os87_c4651_aL	TGTTG	5	20	(TGTTG)	4	(TGTTG)4			Os87_c4651_aL	(TGTTG)4			Os87_c4651_aL	TGTTG				Os87_c4651_a	Os87_c4651_aL	134
Oc_5028_aL	CAGTTTTCCCAGTCACGACCACTGGGGCAGATCAAATTAAAAG	Oc_5028_aR	GTTTCACCAAAATTTCACTAGCGCATAA	(ATAAA)4	(ATAAA)4	ATAAA	155	155	155-155	Monomorphic													NHc_1504_aR	GTTTTTTTATTGTTTGTTTTGATAGCATTGA		yam_O_contig_5028_a	Oc_5028_aL	ATAAA	5	20	(ATAAA)	4	(ATAAA)4			Oc_5028_aL	(ATAAA)4			Oc_5028_aL	ATAAA				Oc_5028_a	Oc_5028_aL	155
Oc_3705cL	CAGTTTTCCCAGTCACGACCAAGCTGGTGATCTTATTCATTGG	Oc_3705cR	GTTTTTCTTTCTTTTCTATACATCTCTCGCA	(AG)10	(AG)10	AG	117	119	117-119	Polymorphic													NHc_3467_aR	GTTTAATGAAATCAAGAATTCCCAGCAA		yam_O_contig_3705_c	Oc_3705cL	AG	2	20	(AG)	10	(AG)10			Oc_3705cL	(AG)10			Oc_3705cL	AG				Oc_3705c	Oc_3705cL	117
Oc_2743_aL	CAGTTTTCCCAGTCACGACCGCTTGTGTAGTGTTTCCATGTTC	Oc_2743_aR	GTTTTGCTCATAAATGGAGTCTTTGGGT	(TA)10	(TA)10	TA	152	154	152-154	Polymorphic													NHc_4375_aR	GTTTGGTTCATCACACACCCAATCTCTA		yam_O_contig_2743_a	Oc_2743_aL	TA	2	20	(TA)	10	(TA)10			Oc_2743_aL	(TA)10			Oc_2743_aL	TA				Oc_2743_a	Oc_2743_aL	152
Oc_148_aL	CAGTTTTCCCAGTCACGACTGTTGGTGTTGATTAAGAGTAGCGG	Oc_148_aR	GTTTCCAGTACAGAGCCATTCCATTCAT	(AAGTG)4	(AAGTG)4	AAGTG	169	169	169-169	Monomorphic													NHc_4781_aR	GTTTGAGCTGCAAGAACTTCATGGTTTT		yam_O_contig_148_a	Oc_148_aL	AAGTG	5	20	(AAGTG)	4	(AAGTG)4			Oc_148_aL	(AAGTG)4			Oc_148_aL	AAGTG				Oc_148_a	Oc_148_aL	169
OsA8_c8634_3_aL	CAGTTTTCCCAGTCACGACGATCACTTTGGTAAGCTTTGGCAG	OsA8_c8634_3_aR	GTTTGTGAAGATCTTGTTTCAAGCGTCA	(AT)10	(AT)10	AT	148	175	148-175	Polymorphic													NHc_5011_bR	GTTTAGCTATCACCACAAAGATCCATCC		yam_O_singleton_A328-33_8_c8634_3_a	OsA8_c8634_3_aL	AT	2	20	(AT)	10	(AT)10			OsA8_c8634_3_aL	(AT)10			OsA8_c8634_3_aL	AT				OsA8_c8634_3_a	OsA8_c8634_3_aL	148
Oc_1707_aL	CAGTTTTCCCAGTCACGACGGTTGTGACCTTTGGATGTAGTTTTT	Oc_1707_aR	GTTTTCATAATCATGTATCAATCCACAGCA	(TTTTG)4	(TTTTG)4	TTTTG	182	185	182-185	Polymorphic													NHc_6846_aR	GTTTTGTTCCTTTATTCATCTTGCTTGTG		yam_O_contig_1707_a	Oc_1707_aL	TTTTG	5	20	(TTTTG)	4	(TTTTG)4			Oc_1707_aL	(TTTTG)4			Oc_1707_aL	TTTTG				Oc_1707_a	Oc_1707_aL	182
Oc_50_aL	CAGTTTTCCCAGTCACGACGCCCTCTGATGGCCTCTAGTTTTA	Oc_50_aR	GTTTAGAGACATTGCAAACAAAAGCCAC	(TA)10	(TA)10	TA	165	175	165-175	Polymorphic													NHs87_c11619_aR	GTTTGACCGATCCGGCCTTTTGTA		yam_O_contig_50_a	Oc_50_aL	TA	2	20	(TA)	10	(TA)10			Oc_50_aL	(TA)10			Oc_50_aL	TA				Oc_50_a	Oc_50_aL	165
Oc_5076_aL	CAGTTTTCCCAGTCACGACACTCTCATTGTTGGGTTTGTGGTT	Oc_5076_aR	GTTTATTGTGACATTTTCCTCTGCCATT	(AT)10	(AT)10	AT	159	184	159-184	Polymorphic													NHs87_lrc3624_aR	GTTTGGGTTTGTTTTACGTGTGTTTTCA		yam_O_contig_5076_a	Oc_5076_aL	AT	2	20	(AT)	10	(AT)10			Oc_5076_aL	(AT)10			Oc_5076_aL	AT				Oc_5076_a	Oc_5076_aL	159
Oc_6143_aL	CAGTTTTCCCAGTCACGACTGGACAAATTCCATCATAGAAGAACC	Oc_6143_aR	GTTTTTGTTTGTCCACTTGAGGCTTACA	(AT)10	(AT)10	AT	171	181	171-181	Polymorphic													NHsA8_c12061_3_aR	GTTTTCTTGTCCTTTTTCTTTCATTTCCC		yam_O_contig_6143_a	Oc_6143_aL	AT	2	20	(AT)	10	(AT)10			Oc_6143_aL	(AT)10			Oc_6143_aL	AT				Oc_6143_a	Oc_6143_aL	171
Oc_5523_aL	CAGTTTTCCCAGTCACGACCATTGTAAAGCTTGGTTGCAGAGA	Oc_5523_aR	GTTTTGAGAGTGATGCGGTTTTTGTTTA	(CT)10	(CT)10	CT	0	0	-	Didn't Work													NHsA8_c13007_2_aR	GTTTACTTTCACCTACCATCATCACCGT		yam_O_contig_5523_a	Oc_5523_aL	CT	2	20	(CT)	10	(CT)10			Oc_5523_aL	(CT)10			Oc_5523_aL	CT				Oc_5523_a	Oc_5523_aL
Oc_5164_aL	CAGTTTTCCCAGTCACGACTTTGATTCTTTTCATTTTTGGTTTGG	Oc_5164_aR	GTTTATCCCATAACACCAGTCCCGAT	(GTTTC)4	(GTTTC)4	GTTTC	162	168	162-168	Polymorphic													NHsA8_c13522_2_aR	GTTTAGAAAATTTGAATCTCACCCCTTC		yam_O_contig_5164_a	Oc_5164_aL	GTTTC	5	20	(GTTTC)	4	(GTTTC)4			Oc_5164_aL	(GTTTC)4			Oc_5164_aL	GTTTC				Oc_5164_a	Oc_5164_aL	162
Oc_4595_aL	CAGTTTTCCCAGTCACGACTACCGTAACCGGCTTAGTTGTAGC	Oc_4595_aR	GTTTCAAAATCTCAGACAGGAGACAGCA	(ATCC)5	(ATCC)5	ATCC	173	177	173-177	Polymorphic													NHsA8_c3256_6_aR	GTTTCAACAATCAAAACCAATGGACTCA		yam_O_contig_4595_a	Oc_4595_aL	ATCC	4	20	(ATCC)	5	(ATCC)5			Oc_4595_aL	(ATCC)5			Oc_4595_aL	ATCC				Oc_4595_a	Oc_4595_aL	173
Os87_lrc3675_aL	CAGTTTTCCCAGTCACGACAGCAGCAGAGAATTGACAACCCTA	Os87_lrc3675_aR	GTTTAACGAACCAACGAAACAAAGTACG	(GT)10	(GT)10	GT	0	0	-	Didn't Work													NHsA8_c4030_10_aR	GTTTTGCTCAATGACCACACTAACTCATC		yam_O_singleton_87-01091-33_1_lrc3675_a	Os87_lrc3675_aL	GT	2	20	(GT)	10	(GT)10			Os87_lrc3675_aL	(GT)10			Os87_lrc3675_aL	GT				Os87_lrc3675_a	Os87_lrc3675_aL
Oc_119_aL	CAGTTTTCCCAGTCACGACCAGAAACCTGAGACCAAGTCCATT	Oc_119_aR	GTTTCAACATGAGTTCACACAACAACGA	(CT)10	(CT)10	CT	179	197	179-197	Polymorphic													NHsA8_c9379_3_aR	GTTTATTCCAAAATACACAATTGGTGCC		yam_O_contig_119_a	Oc_119_aL	CT	2	20	(CT)	10	(CT)10			Oc_119_aL	(CT)10			Oc_119_aL	CT				Oc_119_a	Oc_119_aL	179
Oc_5458_aL	CAGTTTTCCCAGTCACGACAAAAAGCTCCCCGATAAGTTGGT	Oc_5458_aR	GTTTGGGCACTCTAGAATCACTACAGCC	(TA)10	(TA)10	TA	161	172	161-172	Polymorphic													NHsA8_c9564_2_aR	GTTTATGAAATCTATCCAAAGGCCAACA		yam_O_contig_5458_a	Oc_5458_aL	TA	2	20	(TA)	10	(TA)10			Oc_5458_aL	(TA)10			Oc_5458_aL	TA				Oc_5458_a	Oc_5458_aL	161
Oc_7299_aL	CAGTTTTCCCAGTCACGACCAATCCATGATTCTTCGATCTCTAAA	Oc_7299_aR	GTTTGCGATGGAGATCCTGAGTGA	(TAAA)5	(TAAA)5	TAAA	179	180	179-180	Polymorphic													NHsA8_c9852_2_aR	GTTTAATTTGGAACAATGCAAAGCCTAA		yam_O_contig_7299_a	Oc_7299_aL	TAAA	4	20	(TAAA)	5	(TAAA)5			Oc_7299_aL	(TAAA)5			Oc_7299_aL	TAAA				Oc_7299_a	Oc_7299_aL	179
Oc_469_aL	CAGTTTTCCCAGTCACGACTCCTCTGTAACATCATCCTTTGGA	Oc_469_aR	GTTTCACTCCGTTGCATCTCATGATAAC	(AACGG)4	(AACGG)4	AACGG	100	110	100-110	Polymorphic													NHsB9_c10419_2_aR	GTTTCTCCTTTTGTGTGTATTATCATTTGTCA		yam_O_contig_469_a	Oc_469_aL	AACGG	5	20	(AACGG)	4	(AACGG)4			Oc_469_aL	(AACGG)4			Oc_469_aL	AACGG				Oc_469_a	Oc_469_aL	100
Oc_6374_aL	CAGTTTTCCCAGTCACGACGGCCTCGGATGATCATTTCTT	Oc_6374_aR	GTTTCAAAACAAAATCCCAAATGGCTAC	(TTTA)5	(TTTA)5	TTTA	180	181	180-181	Polymorphic													NHsB9_c13489_2_aR	GTTTTGCTTGAGGTAATACTTGCTCATCAT		yam_O_contig_6374_a	Oc_6374_aL	TTTA	4	20	(TTTA)	5	(TTTA)5			Oc_6374_aL	(TTTA)5			Oc_6374_aL	TTTA				Oc_6374_a	Oc_6374_aL	180
OsA8_c5283_4_aL	CAGTTTTCCCAGTCACGACCTTCACAAGGAATGCTAGGGAGAA	OsA8_c5283_4_aR	GTTTTTCATTCAATCAAATACCCACAACA	(AT)10	(AT)10	AT	155	193	155-193	Polymorphic													NHsB9_c13560_2_aR	GTTTCAAAAGAATCAATCAACCCTCCAG		yam_O_singleton_A328-33_8_c5283_4_a	OsA8_c5283_4_aL	AT	2	20	(AT)	10	(AT)10			OsA8_c5283_4_aL	(AT)10			OsA8_c5283_4_aL	AT				OsA8_c5283_4_a	OsA8_c5283_4_aL	155
Oc_2947_bL	CAGTTTTCCCAGTCACGACATAAGATCTGCTGCTTGTTGGCAT	Oc_2947_bR	GTTTTGATTTCAAAAAGGATTAAGACATGGA	(TG)10	(TG)10	TG	147	152	147-152	Polymorphic													NHsB9_c14836_2_aR	GTTTACATGTGCCCATTTAAGACTTGGT		yam_O_contig_2947_b	Oc_2947_bL	TG	2	20	(TG)	10	(TG)10			Oc_2947_bL	(TG)10			Oc_2947_bL	TG				Oc_2947_b	Oc_2947_bL	147
Oc_1395_aL	CAGTTTTCCCAGTCACGACAGGATAAACCCTCTGCCTGTTCAT	Oc_1395_aR	GTTTGAGAGCAAGAAAGTGAAGAAACCCT	(CTCTT)4	(CTCTT)4	CTCTT	120	120	120-120	Monomorphic													NHsB9_c15008_2_aR	GTTTGCATTCCAAGTGAAGAGAAACGTC		yam_O_contig_1395_a	Oc_1395_aL	CTCTT	5	20	(CTCTT)	4	(CTCTT)4			Oc_1395_aL	(CTCTT)4			Oc_1395_aL	CTCTT				Oc_1395_a	Oc_1395_aL	120
Oc_4267_aL	CAGTTTTCCCAGTCACGACATCTTGATGGCTCCTTGAAGACAA	Oc_4267_aR	GTTTCACTACAATGGATTCGAGGGGATA	(AT)10	(AT)10	AT	146	160	146-160	Polymorphic													NHsB9_c15281_2_aR	GTTTAAGCATAACAACGTCTAGATCGGC		yam_O_contig_4267_a	Oc_4267_aL	AT	2	20	(AT)	10	(AT)10			Oc_4267_aL	(AT)10			Oc_4267_aL	AT				Oc_4267_a	Oc_4267_aL	146
Oc_44_aL	CAGTTTTCCCAGTCACGACACAAATTGGTGATGATGAGGCTG	Oc_44_aR	GTTTTCCACACTGCTAGAGAAATGCTTG	(GT)10	(GT)10	GT	253	262	253-262	Polymorphic													NHsB9_c5688_4_aR	GTTTGCTCACCCTTTTCTTGGTTCGT		yam_O_contig_44_a	Oc_44_aL	GT	2	20	(GT)	10	(GT)10			Oc_44_aL	(GT)10			Oc_44_aL	GT				Oc_44_a	Oc_44_aL	253
Oc_6026_aL	CAGTTTTCCCAGTCACGACGATAGGGCTGTGCATGAAACAAG	Oc_6026_aR	GTTTCCATCACAACAGTGCATTACCAAA	(AT)10	(AT)10	AT	180	184	180-184	Polymorphic													NHc_1778_aR	GTTTTCTCACTATCATCAATCTCCGGCT		yam_O_contig_6026_a	Oc_6026_aL	AT	2	20	(AT)	10	(AT)10			Oc_6026_aL	(AT)10			Oc_6026_aL	AT				Oc_6026_a	Oc_6026_aL	180
Oc_4895cL	CAGTTTTCCCAGTCACGACGCGCATGAAGACATAGCAAGTAGA	Oc_4895cR	GTTTGAACCAGAGGTCCAGAACCTATACAA	(AT)10	(AT)10	AT	141	152	141-152	Polymorphic													NHc_268_aR	GTTTCTCTCTGGCTCCCAGTTCTTCATA		yam_O_contig_4895_c	Oc_4895cL	AT	2	20	(AT)	10	(AT)10			Oc_4895cL	(AT)10			Oc_4895cL	AT				Oc_4895c	Oc_4895cL	141
Oc_393_bL	CAGTTTTCCCAGTCACGACGTGGCTTACTGCAAGACGTTATCC	Oc_393_bR	GTTTTAGAAGCGATAGGCGAAATAGACG	(AG)10	(AG)10	AG	115	121	115-121	Polymorphic													NHc_3698_aR	GTTTTGGTGGTTTCTCATTTCCTCCTAA		yam_O_contig_393_b	Oc_393_bL	AG	2	20	(AG)	10	(AG)10			Oc_393_bL	(AG)10			Oc_393_bL	AG				Oc_393_b	Oc_393_bL	115
Oc_2822_bL	CAGTTTTCCCAGTCACGACAAACCCATTAAAGCAAGGCTTCTC	Oc_2822_bR	GTTTGGACTCTCCCAAGTCCATCACTAA	(TCC)6	(TCC)6	TCC	157	160	157-160	Polymorphic													NHc_3786_aR	GTTTCAACTTCTGCTTCTTCACAGGCTT		yam_O_contig_2822_b	Oc_2822_bL	TCC	3	18	(TCC)	6	(TCC)6			Oc_2822_bL	(TCC)6			Oc_2822_bL	TCC				Oc_2822_b	Oc_2822_bL	157
Os87_lrc3379_aL	CAGTTTTCCCAGTCACGACGGTGATTATGGCCGTACGTCTAAC	Os87_lrc3379_aR	GTTTTTTTTACTAGCATCATCGTTCGCA	(GTG)6	(GTG)6	GTG	0	0	-	Didn't Work													NHc_7097_aR	GTTTGCTAACCAAGACTTGCGGAGACT		yam_O_singleton_87-01091-33_1_lrc3379_a	Os87_lrc3379_aL	GTG	3	18	(GTG)	6	(GTG)6			Os87_lrc3379_aL	(GTG)6			Os87_lrc3379_aL	GTG				Os87_lrc3379_a	Os87_lrc3379_aL
Oc_1259_aL	CAGTTTTCCCAGTCACGACGGCCATGAAAACATCTCTATTGCT	Oc_1259_aR	GTTTTGCTCCATCTGATACCTTTCACTG	(GCG)6	(GCG)6	GCG	112	114	112-114	Polymorphic													NHs87_c10771_aR	GTTTAGGAGGAGAGGACGGTGAGAAGT		yam_O_contig_1259_a	Oc_1259_aL	GCG	3	18	(GCG)	6	(GCG)6			Oc_1259_aL	(GCG)6			Oc_1259_aL	GCG				Oc_1259_a	Oc_1259_aL	112
Oc_1804_aL	CAGTTTTCCCAGTCACGACAGAACATCGAGTCAAACACTTCCC	Oc_1804_aR	GTTTAGAACTCAATGCCAAACACAACAA	(GCT)6	(GCT)6	GCT	147	172	147-172	Polymorphic													NHs87_c5683_aR	GTTTATCAATGGATAGAACCGAAACGAA		yam_O_contig_1804_a	Oc_1804_aL	GCT	3	18	(GCT)	6	(GCT)6			Oc_1804_aL	(GCT)6			Oc_1804_aL	GCT				Oc_1804_a	Oc_1804_aL	147
OsB9_c10038_2_aL	CAGTTTTCCCAGTCACGACTTTAAGAGGGATGTTGAAAAATAAACTT	OsB9_c10038_2_aR	GTTTAACTCCTAATCCTTCATATTCCTCAAA	(TTA)6	(TTA)6	TTA	140	174	140-174	Polymorphic													NHs87_c940_aR	GTTTTAAACTTCAGTCAGACCACCACCA		yam_O_singleton_B310-33_9_c10038_2_a	OsB9_c10038_2_aL	TTA	3	18	(TTA)	6	(TTA)6			OsB9_c10038_2_aL	(TTA)6			OsB9_c10038_2_aL	TTA				OsB9_c10038_2_a	OsB9_c10038_2_aL	140
Oc_1923_aL	CAGTTTTCCCAGTCACGACCCAGTCTCTCCATTGCCACTACTT	Oc_1923_aR	GTTTTTTCTTGAGTCTGAGTCCCTTTCG	(TCT)6	(TCT)6	TCT	166	172	166-172	Polymorphic													NHs87_lrc7540_aR	GTTTGTCTGAGATGTTGGGAATAGCACC		yam_O_contig_1923_a	Oc_1923_aL	TCT	3	18	(TCT)	6	(TCT)6			Oc_1923_aL	(TCT)6			Oc_1923_aL	TCT				Oc_1923_a	Oc_1923_aL	166
Oc_798_aL	CAGTTTTCCCAGTCACGACGGGTTCCCTCATCGTCTCTCTAA	Oc_798_aR	GTTTGGAGAAGGACTGAAAGAGAAGCAA	(TCT)6	(TCT)6	TCT	150	157	150-157	Polymorphic													NHs87_lrc9940_aR	GTTTTCACCAAGGAAATCAGAAGTGTCA		yam_O_contig_798_a	Oc_798_aL	TCT	3	18	(TCT)	6	(TCT)6			Oc_798_aL	(TCT)6			Oc_798_aL	TCT				Oc_798_a	Oc_798_aL	150
Oc_5107_aL	CAGTTTTCCCAGTCACGACCGTCTCAAAAATTTCAAGAAATCAAAC	Oc_5107_aR	GTTTGCCCAAATGAATCAAGAAAAGATG	(GTA)6	(GTA)6	GTA	178	182	178-182	Polymorphic																yam_O_contig_5107_a	Oc_5107_aL	GTA	3	18	(GTA)	6	(GTA)6			Oc_5107_aL	(GTA)6			Oc_5107_aL	GTA				Oc_5107_a	Oc_5107_aL	178
Os87_c5620_aL	CAGTTTTCCCAGTCACGACGAGCTTCATTGCTTGTTGTTTGTG	Os87_c5620_aR	GTTTAGCAGTAGCAGGAACAGAGGAAGA	(TCC)6	(TCC)6	TCC	171	171	171-171	Monomorphic													NHsA8_c10860_2_aL	CAGTTTTCCCAGTCACGACGACATAGTTCCATGGCTAGGAGGA		yam_O_singleton_87-01091-33_1_c5620_a	Os87_c5620_aL	TCC	3	18	(TCC)	6	(TCC)6			Os87_c5620_aL	(TCC)6			Os87_c5620_aL	TCC				Os87_c5620_a	Os87_c5620_aL	171
Oc_2285_aL	CAGTTTTCCCAGTCACGACACATAACCTAAACGATCACAATGCC	Oc_2285_aR	GTTTATATGTTTTTGTGTGGGATGCTTG	(ATA)6	(ATA)6	ATA	94	115	94-115	Polymorphic													NHsA8_c12200_2_aL	CAGTTTTCCCAGTCACGACTTAAAAAGATGCTGTTGCTGTTGC		yam_O_contig_2285_a	Oc_2285_aL	ATA	3	18	(ATA)	6	(ATA)6			Oc_2285_aL	(ATA)6			Oc_2285_aL	ATA				Oc_2285_a	Oc_2285_aL	94
Oc_323_aL	CAGTTTTCCCAGTCACGACCTTCGACTCCGACATCAGCC	Oc_323_aR	GTTTACATGGATAAAGGTACCCAGGAGC	(CTC)6	(CTC)6	CTC	158	158	158-158	Monomorphic													NHsA8_c13110_2_aL	CAGTTTTCCCAGTCACGACCCAATTCGTAGGGGAGAGTTCAG		yam_O_contig_323_a	Oc_323_aL	CTC	3	18	(CTC)	6	(CTC)6			Oc_323_aL	(CTC)6			Oc_323_aL	CTC				Oc_323_a	Oc_323_aL	158
Oc_2173cL	CAGTTTTCCCAGTCACGACAAGCACCACCACCTCTTTTAATCA	Oc_2173cR	GTTTAAAGAAGATCAAACCACCAGCATC	(TGA)6	(TGA)6	TGA	120	123	120-123	Polymorphic													NHsA8_c14339_2_aL	CAGTTTTCCCAGTCACGACTCAAAGAGCTATCAAAGAAGGATGAAA		yam_O_contig_2173_c	Oc_2173cL	TGA	3	18	(TGA)	6	(TGA)6			Oc_2173cL	(TGA)6			Oc_2173cL	TGA				Oc_2173c	Oc_2173cL	120
Oc_5817_aL	CAGTTTTCCCAGTCACGACGACCTGGTCTCAATGACATCGTTT	Oc_5817_aR	GTTTTAGTTCAAGGTTCTGGTATGGGGG	(CAG)6	(CAG)6	CAG	0	0	-	Didn't Work													NHsA8_c3500_6_aL	CAGTTTTCCCAGTCACGACCAGAGTTGAAGGTATGATATGCATGG		yam_O_contig_5817_a	Oc_5817_aL	CAG	3	18	(CAG)	6	(CAG)6			Oc_5817_aL	(CAG)6			Oc_5817_aL	CAG				Oc_5817_a	Oc_5817_aL
Os87_c8695_aL	CAGTTTTCCCAGTCACGACGTCTTGCTGTTCTTCCTCATCGAC	Os87_c8695_aR	GTTTATGATCGTTCAAAGCCAGAAACTC	(CGA)6	(CGA)6	CGA	0	0	-	Didn't Work													NHsB9_c10079_2_aL	CAGTTTTCCCAGTCACGACACCCTCCAAAACCAAGTGCTTATC		yam_O_singleton_87-01091-33_1_c8695_a	Os87_c8695_aL	CGA	3	18	(CGA)	6	(CGA)6			Os87_c8695_aL	(CGA)6			Os87_c8695_aL	CGA				Os87_c8695_a	Os87_c8695_aL
Oc_224_aL	CAGTTTTCCCAGTCACGACATTTGGTGGATCAAATCCCTCTTT	Oc_224_aR	GTTTTATTCCCCAAGATATGCAAGCACT	(TTA)6	(TTA)6	TTA	124	124	124-124	Monomorphic													NHsB9_c11446_2_bL	CAGTTTTCCCAGTCACGACAGGCTACAAAAGATGCACCTGAAG		yam_O_contig_224_a	Oc_224_aL	TTA	3	18	(TTA)	6	(TTA)6			Oc_224_aL	(TTA)6			Oc_224_aL	TTA				Oc_224_a	Oc_224_aL	124
Oc_897_aL	CAGTTTTCCCAGTCACGACTGACAATTTAGTGTGAACTGGTGAA	Oc_897_aR	GTTTTCAACCTAACTTTCAATCTCTTCTCTTC	(TTA)6	(TTA)6	TTA	176	186	176-186	Polymorphic													NHsB9_c11476_3_aL	CAGTTTTCCCAGTCACGACTCAAACGCCAATTAACATACTCCA		yam_O_contig_897_a	Oc_897_aL	TTA	3	18	(TTA)	6	(TTA)6			Oc_897_aL	(TTA)6			Oc_897_aL	TTA				Oc_897_a	Oc_897_aL	176
Oc_554_aL	CAGTTTTCCCAGTCACGACTCATAATCGTCCTCCTTGTCGTG	Oc_554_aR	GTTTTAACAAGTCCGATTTCTCCAGAGC	(CGG)6	(CGG)6	CGG	0	0	-	Didn't Work													NHsB9_c12604_2_aL	CAGTTTTCCCAGTCACGACGACGAGAACTTGAATGACCGATCT		yam_O_contig_554_a	Oc_554_aL	CGG	3	18	(CGG)	6	(CGG)6			Oc_554_aL	(CGG)6			Oc_554_aL	CGG				Oc_554_a	Oc_554_aL
Os87_lrc3677_aL	CAGTTTTCCCAGTCACGACATCTCCTCTCTCCTTCACTCCCTC	Os87_lrc3677_aR	GTTTTAGGAGAGTACAAAGTTGGCAGGG	(CTC)6	(CTC)6	CTC	173	173	173-173	Monomorphic													NHsB9_c12667_2_aL	CAGTTTTCCCAGTCACGACTCAGAGTCTTTTTCATTTGATCTGC		yam_O_singleton_87-01091-33_1_lrc3677_a	Os87_lrc3677_aL	CTC	3	18	(CTC)	6	(CTC)6			Os87_lrc3677_aL	(CTC)6			Os87_lrc3677_aL	CTC				Os87_lrc3677_a	Os87_lrc3677_aL	173
Oc_4478_aL	CAGTTTTCCCAGTCACGACGGCTTCTCAATCTCAATCTGGAAT	Oc_4478_aR	GTTTCTTAAGATTCTCGCTCTCGGACTC	(CTC)6	(CTC)6	CTC	141	147	141-147	Polymorphic													NHsB9_c13182_2_aL	CAGTTTTCCCAGTCACGACCATCATGACTCACTTTGTAAACCCC		yam_O_contig_4478_a	Oc_4478_aL	CTC	3	18	(CTC)	6	(CTC)6			Oc_4478_aL	(CTC)6			Oc_4478_aL	CTC				Oc_4478_a	Oc_4478_aL	141
Oc_1225_aL	CAGTTTTCCCAGTCACGACGGTAAGGAGAAATTGGCATCAGTG	Oc_1225_aR	GTTTCCTTCTCCTCAACCTTCTCTTCCT	(TGG)6	(TGG)6	TGG	162	162	162-162	Monomorphic													NHsB9_c14199_2_aL	CAGTTTTCCCAGTCACGACATGAAGATGGAGGTGAGGATGAAA		yam_O_contig_1225_a	Oc_1225_aL	TGG	3	18	(TGG)	6	(TGG)6			Oc_1225_aL	(TGG)6			Oc_1225_aL	TGG				Oc_1225_a	Oc_1225_aL	162
Oc_2998_aL	CAGTTTTCCCAGTCACGACAGCAGATTGATGAATTCTTTTCGG	Oc_2998_aR	GTTTAGGGAAGAGTGATAGTTCCTGGCT	(TTA)6	(TTA)6	TTA	170	170	170-170	Monomorphic													NHsB9_c14481_2_aL	CAGTTTTCCCAGTCACGACTGGAAGATTTGGAGGTCGAGATAG		yam_O_contig_2998_a	Oc_2998_aL	TTA	3	18	(TTA)	6	(TTA)6			Oc_2998_aL	(TTA)6			Oc_2998_aL	TTA				Oc_2998_a	Oc_2998_aL	170
Oc_4870_bL	CAGTTTTCCCAGTCACGACGCCTGAAGGAGGTCTGAACTGAT	Oc_4870_bR	GTTTAGCTTTCACAAGCCTTTTCCTTCT	(AGA)6	(AGA)6	AGA	161	164	161-164	Polymorphic													NHsB9_c9943_3_aL	CAGTTTTCCCAGTCACGACAAACAAGGAAGCACAGACTACAGAGAA		yam_O_contig_4870_b	Oc_4870_bL	AGA	3	18	(AGA)	6	(AGA)6			Oc_4870_bL	(AGA)6			Oc_4870_bL	AGA				Oc_4870_b	Oc_4870_bL	161
Oc_1892_aL	CAGTTTTCCCAGTCACGACTAATGCTATCTGAGGAGGATCCCA	Oc_1892_aR	GTTTACTAAAATAGATGGACGGCTGCAT	(AAC)6	(AAC)6	AAC	169	169	169-169	Monomorphic													NHc_451_aL	CAGTTTTCCCAGTCACGACTGAGTTCAAGTGGGAAGACATCTG		yam_O_contig_1892_a	Oc_1892_aL	AAC	3	18	(AAC)	6	(AAC)6			Oc_1892_aL	(AAC)6			Oc_1892_aL	AAC				Oc_1892_a	Oc_1892_aL	169
Oc_955_aL	CAGTTTTCCCAGTCACGACAGATGATGCAATGTTGGGAAAAGT	Oc_955_aR	GTTTCAAACCATGAAACGCAACTCTACA	(TTA)6	(TTA)6	TTA	179	179	179-179	Monomorphic													NHc_116_aL	CAGTTTTCCCAGTCACGACAATGTTACAAACAGAGCACCAGCA		yam_O_contig_955_a	Oc_955_aL	TTA	3	18	(TTA)	6	(TTA)6			Oc_955_aL	(TTA)6			Oc_955_aL	TTA				Oc_955_a	Oc_955_aL	179
Os87_lrc7533_aL	CAGTTTTCCCAGTCACGACGGAGTGCTTCATTTTCCTCTGATG	Os87_lrc7533_aR	GTTTATTTAAAAAGCAACGCAAAAGCAA	(GAA)6	(GAA)6	GAA	157	157	157-157	Monomorphic													NHc_2801_aL	CAGTTTTCCCAGTCACGACCTTGATCATCATCTCCTCATCTTCAA		yam_O_singleton_87-01091-33_1_lrc7533_a	Os87_lrc7533_aL	GAA	3	18	(GAA)	6	(GAA)6			Os87_lrc7533_aL	(GAA)6			Os87_lrc7533_aL	GAA				Os87_lrc7533_a	Os87_lrc7533_aL	157
Oc_3895_aL	CAGTTTTCCCAGTCACGACATTTCGGGTATTGTGTTCTCTTGG	Oc_3895_aR	GTTTCATCAACACATCCACTGACTCCTC	(GGA)6	(GGA)6	GGA	134	137	134-137	Polymorphic													NHc_4243_aL	CAGTTTTCCCAGTCACGACCAAAGCTTCTTGTTTTTCTTCCCC		yam_O_contig_3895_a	Oc_3895_aL	GGA	3	18	(GGA)	6	(GGA)6			Oc_3895_aL	(GGA)6			Oc_3895_aL	GGA				Oc_3895_a	Oc_3895_aL	134
Os87_lrc4214_bL	CAGTTTTCCCAGTCACGACGCTTGGTTTAGTACTTGGGGACCT	Os87_lrc4214_bR	GTTTATGAAGGTGGAGGAAGAAGGAGAG	(CTT)6	(CTT)6	CTT	151	151	151-151	Monomorphic													NHc_4316_aL	CAGTTTTCCCAGTCACGACGACATTATTAGGCGATTTCCGTGT		yam_O_singleton_87-01091-33_1_lrc4214_b	Os87_lrc4214_bL	CTT	3	18	(CTT)	6	(CTT)6			Os87_lrc4214_bL	(CTT)6			Os87_lrc4214_bL	CTT				Os87_lrc4214_b	Os87_lrc4214_bL	151
Os87_c3168_aL	CAGTTTTCCCAGTCACGACTAAAGCTGGACGCTTTAAGATTCG	Os87_c3168_aR	GTTTCCACTTTATCCGCTTCTTCTCCTT	(AAG)6	(AAG)6	AAG	150	150	150-150	Monomorphic													NHc_4788_aL	CAGTTTTCCCAGTCACGACTCTCTTCTTCTCAAATCAAGTGGG		yam_O_singleton_87-01091-33_1_c3168_a	Os87_c3168_aL	AAG	3	18	(AAG)	6	(AAG)6			Os87_c3168_aL	(AAG)6			Os87_c3168_aL	AAG				Os87_c3168_a	Os87_c3168_aL	150
Oc_3189_aL	CAGTTTTCCCAGTCACGACTTTTGGAGATGGATTCAAAAAGTGA	Oc_3189_aR	GTTTCAGAAAAATAACAACAAATTGAATGGTG	(TGC)6	(TGC)6	TGC	163	175	163-175	Polymorphic													NHs87_c4761_aL	CAGTTTTCCCAGTCACGACTCAAGGTGGTTACTATGGTGGTCA		yam_O_contig_3189_a	Oc_3189_aL	TGC	3	18	(TGC)	6	(TGC)6			Oc_3189_aL	(TGC)6			Oc_3189_aL	TGC				Oc_3189_a	Oc_3189_aL	163
Oc_4494_aL	CAGTTTTCCCAGTCACGACCAGAAGATCAAAGCTGCTGTTCAA	Oc_4494_aR	GTTTATGGGTTCGTTCTTGACTCAACTC	(TTG)6	(TTG)6	TTG	214	220	214-220	Polymorphic													NHs87_c8507_aL	CAGTTTTCCCAGTCACGACTTTTGCAGCAAGATAGGAACAAGA		yam_O_contig_4494_a	Oc_4494_aL	TTG	3	18	(TTG)	6	(TTG)6			Oc_4494_aL	(TTG)6			Oc_4494_aL	TTG				Oc_4494_a	Oc_4494_aL	214
Oc_506_aL	CAGTTTTCCCAGTCACGACCTCATGAGATTCATTCAGGAACCA	Oc_506_aR	GTTTACATCCATCCACTCAAAGTTGGTC	(ATT)6	(ATT)6	ATT	153	162	153-162	Polymorphic													NHs87_lrc10426_aL	CAGTTTTCCCAGTCACGACAACACAAACAAGAAGTAAAACCATGC		yam_O_contig_506_a	Oc_506_aL	ATT	3	18	(ATT)	6	(ATT)6			Oc_506_aL	(ATT)6			Oc_506_aL	ATT				Oc_506_a	Oc_506_aL	153
Oc_5228_aL	CAGTTTTCCCAGTCACGACTTTCTCTACCTGGTGTCCCTTCAC	Oc_5228_aR	GTTTGAAGAAGAGGAAATGGTTGCAGTG	(CAT)6	(CAT)6	CAT	167	191	167-191	Polymorphic													NHs87_lrc3777_aL	CAGTTTTCCCAGTCACGACGGCTATGGAGTTTGTGGCACTTAT		yam_O_contig_5228_a	Oc_5228_aL	CAT	3	18	(CAT)	6	(CAT)6			Oc_5228_aL	(CAT)6			Oc_5228_aL	CAT				Oc_5228_a	Oc_5228_aL	167
Oc_5063_aL	CAGTTTTCCCAGTCACGACGTATACCTCCGATGGTGCCTTCT	Oc_5063_aR	GTTTTGAGACAGACAGCAAGTCCTCAGT	(TCC)6	(TCC)6	TCC	163	166	163-166	Polymorphic													NHsA8_c10866_2_bL	CAGTTTTCCCAGTCACGACGAAGTAGCAGCAGTATGCTTTGGAA		yam_O_contig_5063_a	Oc_5063_aL	TCC	3	18	(TCC)	6	(TCC)6			Oc_5063_aL	(TCC)6			Oc_5063_aL	TCC				Oc_5063_a	Oc_5063_aL	163
Os87_c10557_aL	CAGTTTTCCCAGTCACGACTGTTGTAATCCCATTGGTCCG	Os87_c10557_aR	GTTTTTTCATCCCTTCCAAACCATTACT	(TTC)6	(TTC)6	TTC	173	186	173-186	Polymorphic													NHsA8_c10893_2_aL	CAGTTTTCCCAGTCACGACACGACTGGAATGGATCAGTGCTAT		yam_O_singleton_87-01091-33_1_c10557_a	Os87_c10557_aL	TTC	3	18	(TTC)	6	(TTC)6			Os87_c10557_aL	(TTC)6			Os87_c10557_aL	TTC				Os87_c10557_a	Os87_c10557_aL	173
Os87_lrc4228_bL	CAGTTTTCCCAGTCACGACATCAGTTTCTTGAATTCCACCCAA	Os87_lrc4228_bR	GTTTCACTACCAACAAATAGCAGCAGCA	(TTG)6	(TTG)6	TTG	143	150	143-150	Polymorphic													NHsA8_c11238_2_aL	CAGTTTTCCCAGTCACGACCCATATTAGCACAAGCAAGTCAAATC		yam_O_singleton_87-01091-33_1_lrc4228_b	Os87_lrc4228_bL	TTG	3	18	(TTG)	6	(TTG)6			Os87_lrc4228_bL	(TTG)6			Os87_lrc4228_bL	TTG				Os87_lrc4228_b	Os87_lrc4228_bL	143
Oc_959_aL	CAGTTTTCCCAGTCACGACGATGTTTTCTCCTTCCTGGAACC	Oc_959_aR	GTTTAAGGGGACAACGAGGAAGAGATAG	(GAA)6	(GAA)6	GAA	167	173	167-173	Polymorphic													NHsA8_c12281_2_aL	CAGTTTTCCCAGTCACGACGAATTGAATGAGACCAAGCTGTCC		yam_O_contig_959_a	Oc_959_aL	GAA	3	18	(GAA)	6	(GAA)6			Oc_959_aL	(GAA)6			Oc_959_aL	GAA				Oc_959_a	Oc_959_aL	167
Os87_lrc7923_aL	CAGTTTTCCCAGTCACGACCACGGAGGAATTTTAGAAGGATGA	Os87_lrc7923_aR	GTTTAAACTACCCTCCCAACGACCTC	(GGA)6	(GGA)6	GGA	163	163	163-163	Monomorphic													NHsA8_c3719_7_aL	CAGTTTTCCCAGTCACGACTGGCTTTGAATTTTGCTTCAATCT		yam_O_singleton_87-01091-33_1_lrc7923_a	Os87_lrc7923_aL	GGA	3	18	(GGA)	6	(GGA)6			Os87_lrc7923_aL	(GGA)6			Os87_lrc7923_aL	GGA				Os87_lrc7923_a	Os87_lrc7923_aL	163
Oc_2488_aL	CAGTTTTCCCAGTCACGACTTGCAGATGAGAGCAGTTTGGTTA	Oc_2488_aR	GTTTAGCACAACAACAAAACAACCATTG	(TAT)6	(TAT)6	TAT	182	182	182-182	Monomorphic													NHsA8_c4009_5_aL	CAGTTTTCCCAGTCACGACAATTGCTCTAATCCCTCCCATCTC		yam_O_contig_2488_a	Oc_2488_aL	TAT	3	18	(TAT)	6	(TAT)6			Oc_2488_aL	(TAT)6			Oc_2488_aL	TAT				Oc_2488_a	Oc_2488_aL	182
Oc_2590_aL	CAGTTTTCCCAGTCACGACACTTGTTTGAGAACTCTGGGGTTG	Oc_2590_aR	GTTTCGGCATCCTATACATTGATGCTCT	(TAT)6	(TAT)6	TAT	151	174	151-174	Polymorphic													NHsA8_c4553_8_aL	CAGTTTTCCCAGTCACGACGCACAAACTTACAACAATGAAATGAAA		yam_O_contig_2590_a	Oc_2590_aL	TAT	3	18	(TAT)	6	(TAT)6			Oc_2590_aL	(TAT)6			Oc_2590_aL	TAT				Oc_2590_a	Oc_2590_aL	151
Oc_237_aL	CAGTTTTCCCAGTCACGACGATGAAGGGGCTAAAGTGCAAATA	Oc_237_aR	GTTTGAAAATCAGGCTCATGTTACACCC	(GAT)6	(GAT)6	GAT	177	180	177-180	Polymorphic													NHsA8_c4665_6_aL	CAGTTTTCCCAGTCACGACCAAACTCATTTTTGAAAACCTGCC		yam_O_contig_237_a	Oc_237_aL	GAT	3	18	(GAT)	6	(GAT)6			Oc_237_aL	(GAT)6			Oc_237_aL	GAT				Oc_237_a	Oc_237_aL	177
Oc_4677_bL	CAGTTTTCCCAGTCACGACTAGGGTTAGCGTTAGAGTTCCCGT	Oc_4677_bR	GTTTGTCCAGAGGGGATTCGTCTTG	(CCT)6	(CCT)6	CCT	137	140	137-140	Polymorphic													NHsA8_c5834_4_aL	CAGTTTTCCCAGTCACGACCCGAAACCAGAAATAGAAAACAGTCA		yam_O_contig_4677_b	Oc_4677_bL	CCT	3	18	(CCT)	6	(CCT)6			Oc_4677_bL	(CCT)6			Oc_4677_bL	CCT				Oc_4677_b	Oc_4677_bL	137
Oc_5183_bL	CAGTTTTCCCAGTCACGACGTGGATTCTCGGTGAAACAAAAAC	Oc_5183_bR	GTTTACGAAAAAGGGCTAACAACAACAA	(AAG)6	(AAG)6	AAG	168	171	168-171	Polymorphic													NHsA8_c6180_3_aL	CAGTTTTCCCAGTCACGACGCAAAATGCCTTTTTCTCTTAAATTG		yam_O_contig_5183_b	Oc_5183_bL	AAG	3	18	(AAG)	6	(AAG)6			Oc_5183_bL	(AAG)6			Oc_5183_bL	AAG				Oc_5183_b	Oc_5183_bL	168
Os87_lrc5706_aL	CAGTTTTCCCAGTCACGACCTTGCAGCTCTGAATGCTTACAAC	Os87_lrc5706_aR	GTTTCACCACCATTACCACCTTCTTGTT	(CAT)6	(CAT)6	CAT	169	172	169-172	Polymorphic													NHsA8_c9967_2_aL	CAGTTTTCCCAGTCACGACTTTATCCAGCAAAAGCAAGAGACTT		yam_O_singleton_87-01091-33_1_lrc5706_a	Os87_lrc5706_aL	CAT	3	18	(CAT)	6	(CAT)6			Os87_lrc5706_aL	(CAT)6			Os87_lrc5706_aL	CAT				Os87_lrc5706_a	Os87_lrc5706_aL	169
Oc_1780_aL	CAGTTTTCCCAGTCACGACATTTCCTGGAATTGCCAACATTT	Oc_1780_aR	GTTTAACTGCTCAGCAAATGACTGATGT	(ATT)6	(ATT)6	ATT	159	196	159-196	Polymorphic													NHsB9_c10661_2_aL	CAGTTTTCCCAGTCACGACGCTCAAAACAATTCACTAGTTTGAAAG		yam_O_contig_1780_a	Oc_1780_aL	ATT	3	18	(ATT)	6	(ATT)6			Oc_1780_aL	(ATT)6			Oc_1780_aL	ATT				Oc_1780_a	Oc_1780_aL	159
Oc_4253_aL	CAGTTTTCCCAGTCACGACGTTGCGTCCATCTCCTTCATTATC	Oc_4253_aR	GTTTACCGGGCAATCAAACTACACTTTA	(TCA)6	(TCA)6	TCA	117	124	117-124	Polymorphic													NHsB9_c12804_2_aL	CAGTTTTCCCAGTCACGACGAAAGCATTGACAACCATGAAACA		yam_O_contig_4253_a	Oc_4253_aL	TCA	3	18	(TCA)	6	(TCA)6			Oc_4253_aL	(TCA)6			Oc_4253_aL	TCA				Oc_4253_a	Oc_4253_aL	117
Oc_1629_bL	CAGTTTTCCCAGTCACGACTGAGTTGTTTCAGAGAGAAAATTTCAG	Oc_1629_bR	GTTTCCAATTCCTTATGAACAAAATCAGC	(TGT)6	(TGT)6	TGT	129	129	129-129	Monomorphic													NHsB9_c14405_2_aL	CAGTTTTCCCAGTCACGACGGATAAAAATTTACGAGTTCATTTGATT		yam_O_contig_1629_b	Oc_1629_bL	TGT	3	18	(TGT)	6	(TGT)6			Oc_1629_bL	(TGT)6			Oc_1629_bL	TGT				Oc_1629_b	Oc_1629_bL	129
Oc_5925_aL	CAGTTTTCCCAGTCACGACAGTGGTGCATCATCTGTCACTTCT	Oc_5925_aR	GTTTGCGGCGTTGTCATCTATCATC	(AAT)6	(AAT)6	AAT	102	104	102-104	Polymorphic													NHsB9_c15329_2_aL	CAGTTTTCCCAGTCACGACCAAATGCAACAAATTATCGCAAAA		yam_O_contig_5925_a	Oc_5925_aL	AAT	3	18	(AAT)	6	(AAT)6			Oc_5925_aL	(AAT)6			Oc_5925_aL	AAT				Oc_5925_a	Oc_5925_aL	102
Oc_5988_aL	CAGTTTTCCCAGTCACGACGGCGATACTTGTGGAGGACTCTTA	Oc_5988_aR	GTTTTTAACGAGTTTGAAAACCATGCAA	(TCA)6	(TCA)6	TCA	182	197	182-197	Polymorphic													NHsB9_c5146_5_aL	CAGTTTTCCCAGTCACGACTCACTTCGAGCAAATACAAACACA		yam_O_contig_5988_a	Oc_5988_aL	TCA	3	18	(TCA)	6	(TCA)6			Oc_5988_aL	(TCA)6			Oc_5988_aL	TCA				Oc_5988_a	Oc_5988_aL	182
Oc_4031_aL	CAGTTTTCCCAGTCACGACGGGCTAACAGGAGGAATTAACCAT	Oc_4031_aR	GTTTGTCATATGCTTATCGTCATCGTCG	(TCA)6	(TCA)6	TCA	0	0	-	Didn't Work													NHsB9_c8296_4_aL	CAGTTTTCCCAGTCACGACTGTTCATGGTAGTCTTGGCAGAAA		yam_O_contig_4031_a	Oc_4031_aL	TCA	3	18	(TCA)	6	(TCA)6			Oc_4031_aL	(TCA)6			Oc_4031_aL	TCA				Oc_4031_a	Oc_4031_aL
Oc_6249_aL	CAGTTTTCCCAGTCACGACTTCCGTGGTCTCTTCTTCATCTTC	Oc_6249_aR	GTTTCTTGTCCTCTTTGAATTTCCCCTT	(TCA)6	(TCA)6	TCA	119	119	119-119	Monomorphic													NHsB9_c9597_4_aL	CAGTTTTCCCAGTCACGACAAAATTGTCAACAAGACACCACC		yam_O_contig_6249_a	Oc_6249_aL	TCA	3	18	(TCA)	6	(TCA)6			Oc_6249_aL	(TCA)6			Oc_6249_aL	TCA				Oc_6249_a	Oc_6249_aL	119
Os87_lrc2126_aL	CAGTTTTCCCAGTCACGACCAAAGGGTTTCCAGTGTCCATAAG	Os87_lrc2126_aR	GTTTAATCCAACAATGGTTGCAGAAACT	(TGG)6	(TGG)6	TGG	110	119	110-119	Polymorphic													NHsB9_c9853_3_aL	CAGTTTTCCCAGTCACGACCTAGCTCTTTTTCAGCTGCTCGTC		yam_O_singleton_87-01091-33_1_lrc2126_a	Os87_lrc2126_aL	TGG	3	18	(TGG)	6	(TGG)6			Os87_lrc2126_aL	(TGG)6			Os87_lrc2126_aL	TGG				Os87_lrc2126_a	Os87_lrc2126_aL	110
Oc_4996_bL	CAGTTTTCCCAGTCACGACGGGCTTGGTTGTTTTGTTTTATGT	Oc_4996_bR	GTTTCAAACCCTTCATAAACACACTCTCA	(TTG)6	(TTG)6	TTG	142	150	142-150	Polymorphic													NHsB9_s778_1_aL	CAGTTTTCCCAGTCACGACTGCTTTGTGTTTTGAGGATGATGT		yam_O_contig_4996_b	Oc_4996_bL	TTG	3	18	(TTG)	6	(TTG)6			Oc_4996_bL	(TTG)6			Oc_4996_bL	TTG				Oc_4996_b	Oc_4996_bL	142
Oc_4606_aL	CAGTTTTCCCAGTCACGACCCTCCTCAACATACTACCATTGCC	Oc_4606_aR	GTTTGCCTGTTCCGGATAATTTCATCTT	(TAT)6	(TAT)6	TAT	143	150	143-150	Polymorphic													NHc_3210cL	CAGTTTTCCCAGTCACGACCTTCCACCCATATTTCTCTGAAGC		yam_O_contig_4606_a	Oc_4606_aL	TAT	3	18	(TAT)	6	(TAT)6			Oc_4606_aL	(TAT)6			Oc_4606_aL	TAT				Oc_4606_a	Oc_4606_aL	143
Oc_759_aL	CAGTTTTCCCAGTCACGACGCTGTTTTCCTCCATAGAGATGCT	Oc_759_aR	GTTTGCAATCAACAAAACTATACAGTGTCCA	(TATT)4	(TATT)4	TATT	171	171	171-171	Monomorphic													NHc_451_bL	CAGTTTTCCCAGTCACGACCCAAACCGGTGGCTACTTCTAAAT		yam_O_contig_759_a	Oc_759_aL	TATT	4	16	(TATT)	4	(TATT)4			Oc_759_aL	(TATT)4			Oc_759_aL	TATT				Oc_759_a	Oc_759_aL	171
Oc_2415_bL	CAGTTTTCCCAGTCACGACTCTTGAAATCTTGGGAACTTCCAT	Oc_2415_bR	GTTTACGCTCAACATTCTTATCAAACCA	(TGTA)4	(TGTA)4	TGTA	182	182	182-182	Monomorphic													NHs87_c5029cL	CAGTTTTCCCAGTCACGACTTCCTCACTGTCTTCATTCCCTTC		yam_O_contig_2415_b	Oc_2415_bL	TGTA	4	16	(TGTA)	4	(TGTA)4			Oc_2415_bL	(TGTA)4			Oc_2415_bL	TGTA				Oc_2415_b	Oc_2415_bL	182
Oc_1345_aL	CAGTTTTCCCAGTCACGACATTCCCGGGATTTTTGGTCAC	Oc_1345_aR	GTTTCCTTTGTTTTGAGAGAAAGCGAGA	(TC)8	(TC)8	TC	0	0	-	Didn't Work													NHc_1085_aL	CAGTTTTCCCAGTCACGACCCTTTCTCTTCTGATGCTTCCCTT		yam_O_contig_1345_a	Oc_1345_aL	TC	2	16	(TC)	8	(TC)8			Oc_1345_aL	(TC)8			Oc_1345_aL	TC				Oc_1345_a	Oc_1345_aL
Os87_c9717_aL	CAGTTTTCCCAGTCACGACAGCAGTTCAAGATTCCCAAGTCAG	Os87_c9717_aR	GTTTGCAGATAATCGGATAACAAAGAATGG	(TTAT)4	(TTAT)4	TTAT	158	167	158-167	Polymorphic													NHsA8_c10860_2_aR	GTTTGCAGACATGTGTGGAGATGGTACT		yam_O_singleton_87-01091-33_1_c9717_a	Os87_c9717_aL	TTAT	4	16	(TTAT)	4	(TTAT)4			Os87_c9717_aL	(TTAT)4			Os87_c9717_aL	TTAT				Os87_c9717_a	Os87_c9717_aL	158
Oc_1632_aL	CAGTTTTCCCAGTCACGACGGGATCTCCAACTCCCATCTAAAC	Oc_1632_aR	GTTTCCCATTATTTTTCCTGGAGCTCTT	(CT)8	(CT)8	CT	99	117	99-117	Polymorphic													NHsA8_c12200_2_aR	GTTTCTTTTTGCAGGAAACTTAATGAGTGA		yam_O_contig_1632_a	Oc_1632_aL	CT	2	16	(CT)	8	(CT)8			Oc_1632_aL	(CT)8			Oc_1632_aL	CT				Oc_1632_a	Oc_1632_aL	99
Oc_4872_aL	CAGTTTTCCCAGTCACGACAATCTGAGACACCAGGGATTCAGT	Oc_4872_aR	GTTTGTCATGGTTCATTTGAGCATCTTG	(AT)8	(AT)8	AT	170	172	170-172	Polymorphic													NHsA8_c13110_2_aR	GTTTCCTCTGGATTGGTACCTCATGATT		yam_O_contig_4872_a	Oc_4872_aL	AT	2	16	(AT)	8	(AT)8			Oc_4872_aL	(AT)8			Oc_4872_aL	AT				Oc_4872_a	Oc_4872_aL	170
OsA8_c1745_20_aL	CAGTTTTCCCAGTCACGACTTTACAAGGACCTGCCACTCTCTC	OsA8_c1745_20_aR	GTTTGTTAGTGCTTTGAAGCCTGGATGT	(TC)8	(TC)8	TC	139	144	139-144	Polymorphic													NHsA8_c14339_2_aR	GTTTATGGAGATGTGATTGATGTTGTGG		yam_O_singleton_A328-33_8_c1745_20_a	OsA8_c1745_20_aL	TC	2	16	(TC)	8	(TC)8			OsA8_c1745_20_aL	(TC)8			OsA8_c1745_20_aL	TC				OsA8_c1745_20_a	OsA8_c1745_20_aL	139
Oc_6982_aL	CAGTTTTCCCAGTCACGACATGATTGATGCTGCAAAGAACAAA	Oc_6982_aR	GTTTCAAAGAACAATAAGAATACACCAGCG	(AAAC)4	(AAAC)4	AAAC	161	161	161-161	Monomorphic													NHsA8_c3500_6_aR	GTTTTGTTGATGAACTAATTAACAAAAGGCA		yam_O_contig_6982_a	Oc_6982_aL	AAAC	4	16	(AAAC)	4	(AAAC)4			Oc_6982_aL	(AAAC)4			Oc_6982_aL	AAAC				Oc_6982_a	Oc_6982_aL	161
Oc_5352_aL	CAGTTTTCCCAGTCACGACCATAATTCAAAGCGCACAACACTC	Oc_5352_aR	GTTTTTCTGGAGACAAACATGAAGATGG	(AAAC)4	(AAAC)4	AAAC	124	234	124-234	Polymorphic													NHsB9_c10079_2_aR	GTTTATGTTGTCGCGCGAGATATTTATT		yam_O_contig_5352_a	Oc_5352_aL	AAAC	4	16	(AAAC)	4	(AAAC)4			Oc_5352_aL	(AAAC)4			Oc_5352_aL	AAAC				Oc_5352_a	Oc_5352_aL	124
Oc_2132_aL	CAGTTTTCCCAGTCACGACAGATGTTAATGGGTTGGCAGTGAT	Oc_2132_aR	GTTTGTGTACAAAGATCTGGTGATTGGAAA	(ATCG)4	(ATCG)4	ATCG	174	178	174-178	Polymorphic													NHsB9_c11446_2_bR	GTTTTAGAGTGGTTGCAAAGAGTGCAAG		yam_O_contig_2132_a	Oc_2132_aL	ATCG	4	16	(ATCG)	4	(ATCG)4			Oc_2132_aL	(ATCG)4			Oc_2132_aL	ATCG				Oc_2132_a	Oc_2132_aL	174
Oc_2244_aL	CAGTTTTCCCAGTCACGACGGATGCCAACTTCCACTTTATCAC	Oc_2244_aR	GTTTCATGGATTGAAACTTGGGAGAGAG	(CT)8	(CT)8	CT	130	135	130-135	Polymorphic													NHsB9_c11476_3_aR	GTTTAGTATGTAATGCGAACCCTAAGGC		yam_O_contig_2244_a	Oc_2244_aL	CT	2	16	(CT)	8	(CT)8			Oc_2244_aL	(CT)8			Oc_2244_aL	CT				Oc_2244_a	Oc_2244_aL	130
Oc_2141_aL	CAGTTTTCCCAGTCACGACTCTTCTTTACAACAAGCTGCTGACC	Oc_2141_aR	GTTTTTTTCCTTGCTTTACTGGTTCTGC	(TA)8	(TA)8	TA	145	151	145-151	Polymorphic													NHsB9_c12604_2_aR	GTTTCATTTGGGCAGCTCATATAGGAAT		yam_O_contig_2141_a	Oc_2141_aL	TA	2	16	(TA)	8	(TA)8			Oc_2141_aL	(TA)8			Oc_2141_aL	TA				Oc_2141_a	Oc_2141_aL	145
OsB9_c3050_9_aL	CAGTTTTCCCAGTCACGACTCATTACAAGGGAAGAAGGGATGA	OsB9_c3050_9_aR	GTTTTGGTCAGTTCTTAGTGTCTGGCTG	(CATG)4	(CATG)4	CATG	175	175	175-175	Monomorphic													NHsB9_c12667_2_aR	GTTTCTTAAACAGCTTACCATATCTTGAATGA		yam_O_singleton_B310-33_9_c3050_9_a	OsB9_c3050_9_aL	CATG	4	16	(CATG)	4	(CATG)4			OsB9_c3050_9_aL	(CATG)4			OsB9_c3050_9_aL	CATG				OsB9_c3050_9_a	OsB9_c3050_9_aL	175
Oc_3885_bL	CAGTTTTCCCAGTCACGACTCACTGATAAGGTAAGCAAGATGGC	Oc_3885_bR	GTTTTTGGACAACATTCAAGGAGAAACA	(CT)8	(CT)8	CT	102	110	102-110	Polymorphic													NHsB9_c13182_2_aR	GTTTCATAGCCATGATGGTCATCTTCAG		yam_O_contig_3885_b	Oc_3885_bL	CT	2	16	(CT)	8	(CT)8			Oc_3885_bL	(CT)8			Oc_3885_bL	CT				Oc_3885_b	Oc_3885_bL	102
Oc_191_aL	CAGTTTTCCCAGTCACGACAAATCCATTCCTTTTTACACGCAC	Oc_191_aR	GTTTGTGTGGTTGAGTGGACTTGATGAC	(TTAT)4	(TTAT)4	TTAT	69	69	69-69	Monomorphic													NHsB9_c14199_2_aR	GTTTGATGGTAATCAGGAGCCTCAAGAA		yam_O_contig_191_a	Oc_191_aL	TTAT	4	16	(TTAT)	4	(TTAT)4			Oc_191_aL	(TTAT)4			Oc_191_aL	TTAT				Oc_191_a	Oc_191_aL	69
Oc_4055_aL	CAGTTTTCCCAGTCACGACCAAATCGTAGTGCAAAACATCGAA	Oc_4055_aR	GTTTTGAAAATGATACCCAACTGGAAGAA	(TCCA)4	(TCCA)4	TCCA	165	169	165-169	Polymorphic													NHsB9_c14481_2_aR	GTTTCCTGTGCTCTTTAGAGGTGTCCC		yam_O_contig_4055_a	Oc_4055_aL	TCCA	4	16	(TCCA)	4	(TCCA)4			Oc_4055_aL	(TCCA)4			Oc_4055_aL	TCCA				Oc_4055_a	Oc_4055_aL	165
Oc_3256_aL	CAGTTTTCCCAGTCACGACGCCATTGTTTGCTTATGTGAGAAT	Oc_3256_aR	GTTTGAAGAGGAAATCAATAACCAGAAAGAT	(TA)8	(TA)8	TA	182	184	182-184	Polymorphic													NHsB9_c9943_3_aR	GTTTATTGAGTAGCGTACGTGAGAGCAA		yam_O_contig_3256_a	Oc_3256_aL	TA	2	16	(TA)	8	(TA)8			Oc_3256_aL	(TA)8			Oc_3256_aL	TA				Oc_3256_a	Oc_3256_aL	182
Oc_2430_bL	CAGTTTTCCCAGTCACGACGGCTCAGCACGAAATTGTTTATTT	Oc_2430_bR	GTTTCATCAATATACAAACAAGCGCGAA	(ATTT)4	(ATTT)4	ATTT	176	176	176-176	Monomorphic													NHc_451_aR	GTTTGAGAAGATGCTAGCCTGCCGT		yam_O_contig_2430_b	Oc_2430_bL	ATTT	4	16	(ATTT)	4	(ATTT)4			Oc_2430_bL	(ATTT)4			Oc_2430_bL	ATTT				Oc_2430_b	Oc_2430_bL	176
OsB9_c2370_12_aL	CAGTTTTCCCAGTCACGACGAGTTTGGTTGTTCAATGTGCTTG	OsB9_c2370_12_aR	GTTTACTAACGCCAAAACTACAAAGCCC	(TA)8	(TA)8	TA	183	183	183-183	Monomorphic													NHc_116_aR	GTTTCACAACACCATCATCCAAACTTTC		yam_O_singleton_B310-33_9_c2370_12_a	OsB9_c2370_12_aL	TA	2	16	(TA)	8	(TA)8			OsB9_c2370_12_aL	(TA)8			OsB9_c2370_12_aL	TA				OsB9_c2370_12_a	OsB9_c2370_12_aL	183
Oc_315_aL	CAGTTTTCCCAGTCACGACGTTAGGTTCATGCAGCAACACTTG	Oc_315_aR	GTTTAACTCATCTCACAAATGGAGTGTCTG	(TTTG)4	(TTTG)4	TTTG	123	128	123-128	Polymorphic													NHc_2801_aR	GTTTTCATGCATCTTCATCTCCACATCT		yam_O_contig_315_a	Oc_315_aL	TTTG	4	16	(TTTG)	4	(TTTG)4			Oc_315_aL	(TTTG)4			Oc_315_aL	TTTG				Oc_315_a	Oc_315_aL	123
Oc_1852_aL	CAGTTTTCCCAGTCACGACTGCCATCACTCTTAAATGCAGTACA	Oc_1852_aR	GTTTTGGTTTGGAAGAGAGGAACTCAAA	(TTTA)4	(TTTA)4	TTTA	180	181	180-181	Polymorphic													NHc_4243_aR	GTTTACAACTGTTGCACAACATGCACT		yam_O_contig_1852_a	Oc_1852_aL	TTTA	4	16	(TTTA)	4	(TTTA)4			Oc_1852_aL	(TTTA)4			Oc_1852_aL	TTTA				Oc_1852_a	Oc_1852_aL	180
Oc_3186_aL	CAGTTTTCCCAGTCACGACGAATGCAACCAATGCTCTTACCAT	Oc_3186_aR	GTTTCGTATTATTTTTCATCAATGTCGGC	(AT)8	(AT)8	AT	163	173	163-173	Polymorphic													NHc_4316_aR	GTTTAATGTGATTGCCTGATGGTACAAG		yam_O_contig_3186_a	Oc_3186_aL	AT	2	16	(AT)	8	(AT)8			Oc_3186_aL	(AT)8			Oc_3186_aL	AT				Oc_3186_a	Oc_3186_aL	163
Oc_4278_aL	CAGTTTTCCCAGTCACGACCAAGGACCTATAATGCTCCATTGC	Oc_4278_aR	GTTTATTCTGGCCCTTCTTTATTCTTGG	(AT)8	(AT)8	AT	138	148	138-148	Polymorphic													NHc_4788_aR	GTTTTTCTAGATTCGCGATTAATTTAACTTTT		yam_O_contig_4278_a	Oc_4278_aL	AT	2	16	(AT)	8	(AT)8			Oc_4278_aL	(AT)8			Oc_4278_aL	AT				Oc_4278_a	Oc_4278_aL	138
Oc_1712_aL	CAGTTTTCCCAGTCACGACATGATGATGGTGCTGCAATCTCTA	Oc_1712_aR	GTTTGCCTCAAATTGCTAATACATGGGT	(GAAA)4	(GAAA)4	GAAA	112	119	112-119	Polymorphic													NHs87_c4761_aR	GTTTATGGCGATGCAAAGAGCTATATTT		yam_O_contig_1712_a	Oc_1712_aL	GAAA	4	16	(GAAA)	4	(GAAA)4			Oc_1712_aL	(GAAA)4			Oc_1712_aL	GAAA				Oc_1712_a	Oc_1712_aL	112
Oc_1176_aL	CAGTTTTCCCAGTCACGACAGGTTTAGACGGTGGAAAAGGAAG	Oc_1176_aR	GTTTGAATCCTTTTTCCTAAACCCTCCC	(TA)8	(TA)8	TA	162	171	162-171	Polymorphic													NHs87_c8507_aR	GTTTCCTCCATCCCTTCTCTTGGATAGT		yam_O_contig_1176_a	Oc_1176_aL	TA	2	16	(TA)	8	(TA)8			Oc_1176_aL	(TA)8			Oc_1176_aL	TA				Oc_1176_a	Oc_1176_aL	162
Oc_4953_eL	CAGTTTTCCCAGTCACGACCACCAGGTTTTCCTCATGTCTTCT	Oc_4953_eR	GTTTGACAGGAGCCATGTCCTCTTCTAA	(TGTT)4	(TGTT)4	TGTT	170	170	170-170	Monomorphic													NHs87_lrc10426_aR	GTTTTCCTCTTTTGATCTTTATATTCCATGC		yam_O_contig_4953_e	Oc_4953_eL	TGTT	4	16	(TGTT)	4	(TGTT)4			Oc_4953_eL	(TGTT)4			Oc_4953_eL	TGTT				Oc_4953_e	Oc_4953_eL	170
Oc_4881_aL	CAGTTTTCCCAGTCACGACTCCAAATACACCAACGTATTCCAG	Oc_4881_aR	GTTTTCATCTCTGTAACTCCGAACCTCC	(GA)8	(GA)8	GA	151	167	151-167	Polymorphic													NHs87_lrc3777_aR	GTTTGAGAATTCTTACCCGTACATTAAACCA		yam_O_contig_4881_a	Oc_4881_aL	GA	2	16	(GA)	8	(GA)8			Oc_4881_aL	(GA)8			Oc_4881_aL	GA				Oc_4881_a	Oc_4881_aL	151
Oc_6357_bL	CAGTTTTCCCAGTCACGACAGACGGTTTGATGGCAGTTTTAAG	Oc_6357_bR	GTTTTTTGCAACAGGGTATAGAAGCACA	(AC)8	(AC)8	AC	0	0	-	Didn't Work													NHsA8_c10866_2_bR	GTTTTGAAAATAAAACCATCTCCTCCCA		yam_O_contig_6357_b	Oc_6357_bL	AC	2	16	(AC)	8	(AC)8			Oc_6357_bL	(AC)8			Oc_6357_bL	AC				Oc_6357_b	Oc_6357_bL
Oc_884_aL	CAGTTTTCCCAGTCACGACTTGATTTGTGTTTTACTTGGTTTGC	Oc_884_aR	GTTTCATACAGGTTCCATCAGTTTGTCA	(TA)8	(TA)8	TA	167	167	167-167	Monomorphic													NHsA8_c10893_2_aR	GTTTAAAGTGAGGTGAATTTCCATTTCTTCT		yam_O_contig_884_a	Oc_884_aL	TA	2	16	(TA)	8	(TA)8			Oc_884_aL	(TA)8			Oc_884_aL	TA				Oc_884_a	Oc_884_aL	167
Oc_4913_aL	CAGTTTTCCCAGTCACGACAAGGTGGAGAAGTGGGATGAGAAT	Oc_4913_aR	GTTTGACCAGTTCATTCAAGAACCATCC	(TGTA)4	(TGTA)4	TGTA	158	159	158-159	Polymorphic													NHsA8_c11238_2_aR	GTTTTCATTTCCTCTTTGTTTATGTTCTTGTT		yam_O_contig_4913_a	Oc_4913_aL	TGTA	4	16	(TGTA)	4	(TGTA)4			Oc_4913_aL	(TGTA)4			Oc_4913_aL	TGTA				Oc_4913_a	Oc_4913_aL	158
Oc_5523cL	CAGTTTTCCCAGTCACGACCACCGATCACCGGCTAATTACTAT	Oc_5523cR	GTTTATGCAACGCAAATCTACAACTTCA	(AT)8	(AT)8	AT	122	159	122-159	Polymorphic													NHsA8_c12281_2_aR	GTTTAAGGCTGGTTCTTCTGGAAATCAT		yam_O_contig_5523_c	Oc_5523cL	AT	2	16	(AT)	8	(AT)8			Oc_5523cL	(AT)8			Oc_5523cL	AT				Oc_5523c	Oc_5523cL	122
Oc_988_aL	CAGTTTTCCCAGTCACGACCCAACCTCGCAGAGATAAAAACAA	Oc_988_aR	GTTTAGGAAATTCCATAGCCTCTTGCC	(ATCT)4	(ATCT)4	ATCT	172	186	172-186	Polymorphic													NHsA8_c3719_7_aR	GTTTGACTTTTGGGTACTTCCCCGTAAT		yam_O_contig_988_a	Oc_988_aL	ATCT	4	16	(ATCT)	4	(ATCT)4			Oc_988_aL	(ATCT)4			Oc_988_aL	ATCT				Oc_988_a	Oc_988_aL	172
Oc_2567_aL	CAGTTTTCCCAGTCACGACTGCTGCTGTCTATGCTTGCTGTAT	Oc_2567_aR	GTTTATAATTGCCCTTCTCGCACTCATT	(TTTA)4	(TTTA)4	TTTA	179	185	179-185	Polymorphic													NHsA8_c4009_5_aR	GTTTCGCTTGTTTTCTCTCAACTCTTTCTC		yam_O_contig_2567_a	Oc_2567_aL	TTTA	4	16	(TTTA)	4	(TTTA)4			Oc_2567_aL	(TTTA)4			Oc_2567_aL	TTTA				Oc_2567_a	Oc_2567_aL	179
Oc_4014_aL	CAGTTTTCCCAGTCACGACCCACTTTCCCTTTCTCTTCGTTTT	Oc_4014_aR	GTTTATGGTATTGTTGGTCTTGTCCGAG	(GA)8	(GA)8	GA	167	167	167-167	Monomorphic													NHsA8_c4553_8_aR	GTTTTGGAACCTCTTTATGGTTGAGGAA		yam_O_contig_4014_a	Oc_4014_aL	GA	2	16	(GA)	8	(GA)8			Oc_4014_aL	(GA)8			Oc_4014_aL	GA				Oc_4014_a	Oc_4014_aL	167
Oc_2008_aL	CAGTTTTCCCAGTCACGACCAACCTTATTCCCAAAGATAAAACTGA	Oc_2008_aR	GTTTTCATGCTGGAGTTTAATTTCAAGGT	(AT)8	(AT)8	AT	161	161	161-161	Monomorphic													NHsA8_c4665_6_aR	GTTTTGGTTCTCATTTGAAATACCTGCC		yam_O_contig_2008_a	Oc_2008_aL	AT	2	16	(AT)	8	(AT)8			Oc_2008_aL	(AT)8			Oc_2008_aL	AT				Oc_2008_a	Oc_2008_aL	161
Oc_206_bL	CAGTTTTCCCAGTCACGACTATGATGGAGATTGGAGTGGTGTG	Oc_206_bR	GTTTATATCATTAAGCACCTGCCAGGAA	(GATG)4	(GATG)4	GATG	115	115	115-115	Monomorphic													NHsA8_c5834_4_aR	GTTTCTAAAGAAGCCTCGAATGTCGGAT		yam_O_contig_206_b	Oc_206_bL	GATG	4	16	(GATG)	4	(GATG)4			Oc_206_bL	(GATG)4			Oc_206_bL	GATG				Oc_206_b	Oc_206_bL	115
Oc_2093_aL	CAGTTTTCCCAGTCACGACAATTAAGAGATCGTGATTCGTGGC	Oc_2093_aR	GTTTCCAGGAACACAGTCAAAAATAATAAGAA	(TTAA)4	(TTAA)4	TTAA	179	180	179-180	Polymorphic													NHsA8_c6180_3_aR	GTTTTGCCTTTCTTTTTCTTTCATCCTG		yam_O_contig_2093_a	Oc_2093_aL	TTAA	4	16	(TTAA)	4	(TTAA)4			Oc_2093_aL	(TTAA)4			Oc_2093_aL	TTAA				Oc_2093_a	Oc_2093_aL	179
Oc_179_aL	CAGTTTTCCCAGTCACGACCGGGAGCTTGAGAAGACATTGATA	Oc_179_aR	GTTTTTGCCACTGAAGGTGAAAAATAGG	(CTTT)4	(CTTT)4	CTTT	155	155	155-155	Monomorphic													NHsA8_c9967_2_aR	GTTTCATTTTTCAGTCAAGCAGGAAACA		yam_O_contig_179_a	Oc_179_aL	CTTT	4	16	(CTTT)	4	(CTTT)4			Oc_179_aL	(CTTT)4			Oc_179_aL	CTTT				Oc_179_a	Oc_179_aL	155
Oc_2589_aL	CAGTTTTCCCAGTCACGACGAGAAAGCACCAATTACAAAGCGT	Oc_2589_aR	GTTTCATTGGATTGGTACTGTGAACAACA	(AT)8	(AT)8	AT	149	154	149-154	Polymorphic													NHsB9_c10661_2_aR	GTTTAAAGGTTTCGTGCAAGTAAGAGTG		yam_O_contig_2589_a	Oc_2589_aL	AT	2	16	(AT)	8	(AT)8			Oc_2589_aL	(AT)8			Oc_2589_aL	AT				Oc_2589_a	Oc_2589_aL	149
Oc_4536_bL	CAGTTTTCCCAGTCACGACATATGTACCTGGAAAGGGTGGTGT	Oc_4536_bR	GTTTGCCATAATTTTGTTCCTTTTCTTTATTT	(AT)8	(AT)8	AT	159	161	159-161	Polymorphic													NHsB9_c12804_2_aR	GTTTATTGATGCTCTTTGTTCTTGCTGC		yam_O_contig_4536_b	Oc_4536_bL	AT	2	16	(AT)	8	(AT)8			Oc_4536_bL	(AT)8			Oc_4536_bL	AT				Oc_4536_b	Oc_4536_bL	159
Oc_2676_bL	CAGTTTTCCCAGTCACGACTCCATATAGCTAGAGCCGTAACCC	Oc_2676_bR	GTTTCAACCAAACATCAGATAAAATACCGA	(AT)8	(AT)8	AT	178	180	178-180	Polymorphic													NHsB9_c14405_2_aR	GTTTTTCCCCGATGAAACATTAAAGA		yam_O_contig_2676_b	Oc_2676_bL	AT	2	16	(AT)	8	(AT)8			Oc_2676_bL	(AT)8			Oc_2676_bL	AT				Oc_2676_b	Oc_2676_bL	178
Oc_3442_aL	CAGTTTTCCCAGTCACGACTTTATGTTTGAACATTTTGCCCCT	Oc_3442_aR	GTTTCAAGCTCACAACCCTATCCTTGTT	(GA)8	(GA)8	GA	148	150	148-150	Polymorphic													NHsB9_c15329_2_aR	GTTTGGATCTTTGTTTGGTTTCTTGGTG		yam_O_contig_3442_a	Oc_3442_aL	GA	2	16	(GA)	8	(GA)8			Oc_3442_aL	(GA)8			Oc_3442_aL	GA				Oc_3442_a	Oc_3442_aL	148
Oc_30_dL	CAGTTTTCCCAGTCACGACCATCCGGGCAGTTTTTACTTTTTA	Oc_30_dR	GTTTTTATCTGGTTTGCAAGTTGGCTTT	(AT)8	(AT)8	AT	153	173	153-173	Polymorphic													NHsB9_c5146_5_aR	GTTTGAATGGTGGACAAGAAGTCAGGTT		yam_O_contig_30_d	Oc_30_dL	AT	2	16	(AT)	8	(AT)8			Oc_30_dL	(AT)8			Oc_30_dL	AT				Oc_30_d	Oc_30_dL	153
Oc_1570_aL	CAGTTTTCCCAGTCACGACCTCTCTCGTATGATGGTGTGCTTG	Oc_1570_aR	GTTTCCAACTCTCAAAGACAAGCTCAAAG	(TGCT)4	(TGCT)4	TGCT	134	134	134-134	Monomorphic													NHsB9_c8296_4_aR	GTTTACTTAATAAATGGCAAATGCACCC		yam_O_contig_1570_a	Oc_1570_aL	TGCT	4	16	(TGCT)	4	(TGCT)4			Oc_1570_aL	(TGCT)4			Oc_1570_aL	TGCT				Oc_1570_a	Oc_1570_aL	134
Os87_c2260_aL	CAGTTTTCCCAGTCACGACTTCCACCATTTATAAGGTCGTCAGA	Os87_c2260_aR	GTTTAACGCCAATAAAAGTTCCATTTCA	(TTAT)4	(TTAT)4	TTAT	169	178	169-178	Polymorphic													NHsB9_c9597_4_aR	GTTTGGAGATGTGAGTCTGTTACGTGTG		yam_O_singleton_87-01091-33_1_c2260_a	Os87_c2260_aL	TTAT	4	16	(TTAT)	4	(TTAT)4			Os87_c2260_aL	(TTAT)4			Os87_c2260_aL	TTAT				Os87_c2260_a	Os87_c2260_aL	169
OsA8_c3957_8_aL	CAGTTTTCCCAGTCACGACTACCATCTTCATGGTTGGGCTACT	OsA8_c3957_8_aR	GTTTCAATTGATTTCCTGCAGTCTCAGTT	(AT)8	(AT)8	AT	132	139	132-139	Polymorphic													NHsB9_c9853_3_aR	GTTTAATCGCCATTGTCTTTAATGGTTG		yam_O_singleton_A328-33_8_c3957_8_a	OsA8_c3957_8_aL	AT	2	16	(AT)	8	(AT)8			OsA8_c3957_8_aL	(AT)8			OsA8_c3957_8_aL	AT				OsA8_c3957_8_a	OsA8_c3957_8_aL	132
Oc_509_aL	CAGTTTTCCCAGTCACGACAAAAGGGAACAAGGTCTCCTTATTTA	Oc_509_aR	GTTTAGGCAAAGATGAATGTACTAATCAAAA	(GTAT)4	(GTAT)4	GTAT	179	187	179-187	Polymorphic													NHsB9_s778_1_aR	GTTTTTTGAGCTTGTCTTTGAGAGTTGG		yam_O_contig_509_a	Oc_509_aL	GTAT	4	16	(GTAT)	4	(GTAT)4			Oc_509_aL	(GTAT)4			Oc_509_aL	GTAT				Oc_509_a	Oc_509_aL	179
Oc_472_aL	CAGTTTTCCCAGTCACGACAAAGGGATCATCCTAGTTACTTCAATGT	Oc_472_aR	GTTTCGTACAAATCTGACTTGCTTGCTT	(TA)8	(TA)8	TA	175	177	175-177	Polymorphic													NHc_3210cR	GTTTGGGAGGACAAAGACAGTCTCAAAA		yam_O_contig_472_a	Oc_472_aL	TA	2	16	(TA)	8	(TA)8			Oc_472_aL	(TA)8			Oc_472_aL	TA				Oc_472_a	Oc_472_aL	175
Oc_6374_bL	CAGTTTTCCCAGTCACGACGCCTCGGATGATCATTTCTTTTATT	Oc_6374_bR	GTTTCAAAACAAAATCCCAAATGGCTAC	(TAAA)4	(TAAA)4	TAAA	179	180	179-180	Polymorphic													NHc_451_bR	GTTTTGATAGATCAAACACAAACAAACACAAA		yam_O_contig_6374_b	Oc_6374_bL	TAAA	4	16	(TAAA)	4	(TAAA)4			Oc_6374_bL	(TAAA)4			Oc_6374_bL	TAAA				Oc_6374_b	Oc_6374_bL	179
Oc_6120_aL	CAGTTTTCCCAGTCACGACGATAGCTTTTGTTTGATTGACCCAA	Oc_6120_aR	GTTTATTCAGCAGGAAATTACATGCCAC	(AT)8	(AT)8	AT	177	191	177-191	Polymorphic													NHs87_c5029cR	GTTTCCACAACCAATTCCTCTTAAACAAG		yam_O_contig_6120_a	Oc_6120_aL	AT	2	16	(AT)	8	(AT)8			Oc_6120_aL	(AT)8			Oc_6120_aL	AT				Oc_6120_a	Oc_6120_aL	177
Oc_6011_aL	CAGTTTTCCCAGTCACGACGCCTCGGCTCTCATGAAATACTTA	Oc_6011_aR	GTTTCCACACCAGATGAGAATACACTGC	(AAAT)4	(AAAT)4	AAAT	102	102	102-102	Monomorphic													NHc_1085_aR	GTTTGAGAGAGGAGGTGAAAACATGTACAAA		yam_O_contig_6011_a	Oc_6011_aL	AAAT	4	16	(AAAT)	4	(AAAT)4			Oc_6011_aL	(AAAT)4			Oc_6011_aL	AAAT				Oc_6011_a	Oc_6011_aL	102
Oc_2034_aL	CAGTTTTCCCAGTCACGACTGAGAGCTAGACGAGATGTGATCG	Oc_2034_aR	GTTTCATACAAGATGATGATTTGCAGGC	(TATC)4	(TATC)4	TATC	176	180	176-180	Polymorphic																yam_O_contig_2034_a	Oc_2034_aL	TATC	4	16	(TATC)	4	(TATC)4			Oc_2034_aL	(TATC)4			Oc_2034_aL	TATC				Oc_2034_a	Oc_2034_aL	176
OsA8_c6231_6_aL	CAGTTTTCCCAGTCACGACCACTTTTCTTTTTGTTTCCTGGCA	OsA8_c6231_6_aR	GTTTAATACTGCAGGGTTGTTCTGAAGG	(ACAT)4	(ACAT)4	ACAT	177	177	177-177	Monomorphic													NHc_120_aL	CAGTTTTCCCAGTCACGACTCTCATGTGATCTTCCTCCATCAA		yam_O_singleton_A328-33_8_c6231_6_a	OsA8_c6231_6_aL	ACAT	4	16	(ACAT)	4	(ACAT)4			OsA8_c6231_6_aL	(ACAT)4			OsA8_c6231_6_aL	ACAT				OsA8_c6231_6_a	OsA8_c6231_6_aL	177
Oc_2506_bL	CAGTTTTCCCAGTCACGACCCAACGAAATATGCATGGTTAAAT	Oc_2506_bR	GTTTAAAACACAACACTTACTACTGATCCTTG	(TA)8	(TA)8	TA	149	156	149-156	Polymorphic													NHc_2273_aL	CAGTTTTCCCAGTCACGACAGGAAGTGATCGGTACAATCGAGA		yam_O_contig_2506_b	Oc_2506_bL	TA	2	16	(TA)	8	(TA)8			Oc_2506_bL	(TA)8			Oc_2506_bL	TA				Oc_2506_b	Oc_2506_bL	149
Oc_4552_aL	CAGTTTTCCCAGTCACGACATTCCCGGGATCTCTCCTCTC	Oc_4552_aR	GTTTTCCAGAGGTTTGAAATCCATGAGT	(CT)8	(CT)8	CT	134	134	134-134	Monomorphic													NHc_4075_aL	CAGTTTTCCCAGTCACGACTCCCGGGATAGAGGTTATTAAGGA		yam_O_contig_4552_a	Oc_4552_aL	CT	2	16	(CT)	8	(CT)8			Oc_4552_aL	(CT)8			Oc_4552_aL	CT				Oc_4552_a	Oc_4552_aL	134
OsA8_c5428_4_aL	CAGTTTTCCCAGTCACGACACCCAGCTTCATTTCTCCAAGAG	OsA8_c5428_4_aR	GTTTATCTTGTGCCCACTGTTCAATGT	(AG)8	(AG)8	AG	114	120	114-120	Polymorphic													NHc_504_aL	CAGTTTTCCCAGTCACGACTGTCAAATTCAGCAACATCAACAG		yam_O_singleton_A328-33_8_c5428_4_a	OsA8_c5428_4_aL	AG	2	16	(AG)	8	(AG)8			OsA8_c5428_4_aL	(AG)8			OsA8_c5428_4_aL	AG				OsA8_c5428_4_a	OsA8_c5428_4_aL	114
Oc_3261_aL	CAGTTTTCCCAGTCACGACAAATGGCATCATCCTTAACGAAAG	Oc_3261_aR	GTTTAAACACCAACAATTCAATCTCTTTGA	(AT)8	(AT)8	AT	169	173	169-173	Polymorphic													NHc_5633_aL	CAGTTTTCCCAGTCACGACCACCTCCTCATTCACCGAACTAAC		yam_O_contig_3261_a	Oc_3261_aL	AT	2	16	(AT)	8	(AT)8			Oc_3261_aL	(AT)8			Oc_3261_aL	AT				Oc_3261_a	Oc_3261_aL	169
Os87_c9978_aL	CAGTTTTCCCAGTCACGACCAATGATTGCTTCCACTCTGTTGT	Os87_c9978_aR	GTTTTTGCTTTTGTGTTCATGTTCATGTT	(TTGA)4	(TTGA)4	TTGA	160	160	160-160	Monomorphic													NHc_6025_aL	CAGTTTTCCCAGTCACGACCTATGAAGAAGGTGAGGAAGGCTG		yam_O_singleton_87-01091-33_1_c9978_a	Os87_c9978_aL	TTGA	4	16	(TTGA)	4	(TTGA)4			Os87_c9978_aL	(TTGA)4			Os87_c9978_aL	TTGA				Os87_c9978_a	Os87_c9978_aL	160
OsA8_c6740_3_aL	CAGTTTTCCCAGTCACGACATCCATCCTCCACCTTTCGTC	OsA8_c6740_3_aR	GTTTTGTCCAAGAACTCCTTGTCACAGT	(GA)8	(GA)8	GA	125	141	125-141	Polymorphic													NHc_6117_aL	CAGTTTTCCCAGTCACGACATCAAAACCCGCCGGTGATA		yam_O_singleton_A328-33_8_c6740_3_a	OsA8_c6740_3_aL	GA	2	16	(GA)	8	(GA)8			OsA8_c6740_3_aL	(GA)8			OsA8_c6740_3_aL	GA				OsA8_c6740_3_a	OsA8_c6740_3_aL	125
Oc_3021_aL	CAGTTTTCCCAGTCACGACAACAGAGCCAAACAAAGAGGTGAC	Oc_3021_aR	GTTTTTTCATGAAGTACATTTGCGAGGA	(AT)8	(AT)8	AT	0	0	-	Didn't Work													NHc_6145_aL	CAGTTTTCCCAGTCACGACTTGCTACTGATGATGTTGTTGGTG		yam_O_contig_3021_a	Oc_3021_aL	AT	2	16	(AT)	8	(AT)8			Oc_3021_aL	(AT)8			Oc_3021_aL	AT				Oc_3021_a	Oc_3021_aL
Oc_4904_aL	CAGTTTTCCCAGTCACGACTCAATCATGGAAAATTGAGCAGAG	Oc_4904_aR	GTTTAAAGCTTCTTTTAGTAGCACCCCA	(AT)8	(AT)8	AT	163	171	163-171	Polymorphic													NHc_6237_aL	CAGTTTTCCCAGTCACGACTGCTACTTCGCTTCTCGTCTTCTT		yam_O_contig_4904_a	Oc_4904_aL	AT	2	16	(AT)	8	(AT)8			Oc_4904_aL	(AT)8			Oc_4904_aL	AT				Oc_4904_a	Oc_4904_aL	163
Oc_2156_aL	CAGTTTTCCCAGTCACGACAGTGAAGCATATTCGATCTCTGGG	Oc_2156_aR	GTTTTGTAAGAAGAAAAGCAAAAGAACATGAA	(TATT)4	(TATT)4	TATT	117	117	117-117	Monomorphic													NHc_6296_aL	CAGTTTTCCCAGTCACGACAGAGTTGTCAGGTCATTTTCCTCG		yam_O_contig_2156_a	Oc_2156_aL	TATT	4	16	(TATT)	4	(TATT)4			Oc_2156_aL	(TATT)4			Oc_2156_aL	TATT				Oc_2156_a	Oc_2156_aL	117
Oc_4366cL	CAGTTTTCCCAGTCACGACAAGTGCCCTTAAACTGAGGATGAA	Oc_4366cR	GTTTTGCCACATATCACAAACTTAACACAA	(GA)8	(GA)8	GA	143	171	143-171	Polymorphic													NHc_6686_aL	CAGTTTTCCCAGTCACGACCTCCAGCACTCTCCCTGTACAAAT		yam_O_contig_4366_c	Oc_4366cL	GA	2	16	(GA)	8	(GA)8			Oc_4366cL	(GA)8			Oc_4366cL	GA				Oc_4366c	Oc_4366cL	143
Oc_117cL	CAGTTTTCCCAGTCACGACCCAGTGTTATGTTTGGATTAGTGATGA	Oc_117cR	GTTTCCTTAAAAATCCAGCGCTTACAAA	(TTAT)4	(TTAT)4	TTAT	171	183	171-183	Polymorphic													NHc_6868_aL	CAGTTTTCCCAGTCACGACTATTTATTCGGCATTCTTTGGGTG		yam_O_contig_117_c	Oc_117cL	TTAT	4	16	(TTAT)	4	(TTAT)4			Oc_117cL	(TTAT)4			Oc_117cL	TTAT				Oc_117c	Oc_117cL	171
Oc_2340_aL	CAGTTTTCCCAGTCACGACAGCGCATTCCATATCGTAGTTCAT	Oc_2340_aR	GTTTTCGAAGATAAAAGAGGGGGCTTTA	(AT)8	(AT)8	AT	171	174	171-174	Polymorphic													NHs87_c10016_aL	CAGTTTTCCCAGTCACGACGAGTTCAGTCCTGTTAGTTACAACTGC		yam_O_contig_2340_a	Oc_2340_aL	AT	2	16	(AT)	8	(AT)8			Oc_2340_aL	(AT)8			Oc_2340_aL	AT				Oc_2340_a	Oc_2340_aL	171
Oc_285_aL	CAGTTTTCCCAGTCACGACTAAGACGAGGGACACAACAAACAG	Oc_285_aR	GTTTACTGATGATGATGCTGACGATGAT	(TA)8	(TA)8	TA	96	106	96-106	Polymorphic													NHs87_c10831_aL	CAGTTTTCCCAGTCACGACACATGATGGACGTGTGTAGGAATG		yam_O_contig_285_a	Oc_285_aL	TA	2	16	(TA)	8	(TA)8			Oc_285_aL	(TA)8			Oc_285_aL	TA				Oc_285_a	Oc_285_aL	96
Oc_183cL	CAGTTTTCCCAGTCACGACATCGTCTCCTTTCGTAGTGCTCTG	Oc_183cR	GTTTACAGTACATGCATAAGAACGAGCCT	(AG)8	(AG)8	AG	170	174	170-174	Polymorphic													NHs87_c10893_aL	CAGTTTTCCCAGTCACGACGGATCGACGACGAATCGAAG		yam_O_contig_183_c	Oc_183cL	AG	2	16	(AG)	8	(AG)8			Oc_183cL	(AG)8			Oc_183cL	AG				Oc_183c	Oc_183cL	170
Oc_6369_aL	CAGTTTTCCCAGTCACGACCACATCGCACAAAAAGCAAATAAT	Oc_6369_aR	GTTTTAGCTGCCCGGTAGTCGTAATAAA	(AT)8	(AT)8	AT	153	169	153-169	Polymorphic													NHs87_c11241_aL	CAGTTTTCCCAGTCACGACCTACGATGAGTTCCTCGAGACCC		yam_O_contig_6369_a	Oc_6369_aL	AT	2	16	(AT)	8	(AT)8			Oc_6369_aL	(AT)8			Oc_6369_aL	AT				Oc_6369_a	Oc_6369_aL	153
Oc_7164_aL	CAGTTTTCCCAGTCACGACCAGCAACAGTACGAGGCAGAGATA	Oc_7164_aR	GTTTTACTACTGCAGCACCATGGACATT	(GAT)5	(GAT)5	GAT	125	125	125-125	Monomorphic													NHs87_c3681_aL	CAGTTTTCCCAGTCACGACAGATGGAGATCTCACCGGAGGT		yam_O_contig_7164_a	Oc_7164_aL	GAT	3	15	(GAT)	5	(GAT)5			Oc_7164_aL	(GAT)5			Oc_7164_aL	GAT				Oc_7164_a	Oc_7164_aL	125
Oc_5890_aL	CAGTTTTCCCAGTCACGACTAGAACATCCCCTCAGCTTCAAGT	Oc_5890_aR	GTTTCAAGTCATCATGTTCTGGAGGTTG	(ATC)5	(ATC)5	ATC	171	180	171-180	Polymorphic													NHs87_c7757_aL	CAGTTTTCCCAGTCACGACAAGCTTCGATCCCTCTTTCCAAT		yam_O_contig_5890_a	Oc_5890_aL	ATC	3	15	(ATC)	5	(ATC)5			Oc_5890_aL	(ATC)5			Oc_5890_aL	ATC				Oc_5890_a	Oc_5890_aL	171
Oc_4869_bL	CAGTTTTCCCAGTCACGACGAGAAGGCAGCATTTGATGAATCT	Oc_4869_bR	GTTTGTTTCATCCCCTTCATCATCTGAG	(GAT)5	(GAT)5	GAT	115	126	115-126	Polymorphic													NHs87_c8503_aL	CAGTTTTCCCAGTCACGACCACTTACGATCCTCTCGATTACGC		yam_O_contig_4869_b	Oc_4869_bL	GAT	3	15	(GAT)	5	(GAT)5			Oc_4869_bL	(GAT)5			Oc_4869_bL	GAT				Oc_4869_b	Oc_4869_bL	115
Oc_152_aL	CAGTTTTCCCAGTCACGACCTCCAATGAACCCAATCCAGTTAC	Oc_152_aR	GTTTGGGAGGAGAGTGCAGGATTATTAAA	(TCT)5	(TCT)5	TCT	104	104	104-104	Monomorphic													NHs87_c8985_aL	CAGTTTTCCCAGTCACGACGGCTCTTGTTGAAGGATTAGGGTT		yam_O_contig_152_a	Oc_152_aL	TCT	3	15	(TCT)	5	(TCT)5			Oc_152_aL	(TCT)5			Oc_152_aL	TCT				Oc_152_a	Oc_152_aL	104
OsB9_c9187_3_aL	CAGTTTTCCCAGTCACGACGAAGGAGGGGTTTAATGAAGAGGA	OsB9_c9187_3_aR	GTTTCCTCCTCAAGTGCTCTTTGTTCTC	(GAT)5	(GAT)5	GAT	124	124	124-124	Monomorphic													NHs87_lrc9008_aL	CAGTTTTCCCAGTCACGACCCTGTGAGTGCACACGTAGAGAGT		yam_O_singleton_B310-33_9_c9187_3_a	OsB9_c9187_3_aL	GAT	3	15	(GAT)	5	(GAT)5			OsB9_c9187_3_aL	(GAT)5			OsB9_c9187_3_aL	GAT				OsB9_c9187_3_a	OsB9_c9187_3_aL	124
Oc_1837_bL	CAGTTTTCCCAGTCACGACGAATTCCCGGGATCTTTTATCATC	Oc_1837_bR	GTTTGGAGTGATCTTGGCTTCAAACTGT	(TTC)5	(TTC)5	TTC	0	0	-	Didn't Work													NHs87_lrc9455_aL	CAGTTTTCCCAGTCACGACGTTTCTCATTTCGCTCCGAAGAA		yam_O_contig_1837_b	Oc_1837_bL	TTC	3	15	(TTC)	5	(TTC)5			Oc_1837_bL	(TTC)5			Oc_1837_bL	TTC				Oc_1837_b	Oc_1837_bL
Oc_3548_aL	CAGTTTTCCCAGTCACGACGACTATGTTCGACTCGTTGGAAGG	Oc_3548_aR	GTTTCACCTCAGACATCAACTGGTCTTG	(GCG)5	(GCG)5	GCG	129	129	129-129	Monomorphic													NHsA8_c10143_2_aL	CAGTTTTCCCAGTCACGACTGTTTCCACTAATATGGGAATGGG		yam_O_contig_3548_a	Oc_3548_aL	GCG	3	15	(GCG)	5	(GCG)5			Oc_3548_aL	(GCG)5			Oc_3548_aL	GCG				Oc_3548_a	Oc_3548_aL	129
Oc_124_bL	CAGTTTTCCCAGTCACGACTCCTTGAGCCACCTTCAAGTATTC	Oc_124_bR	GTTTTACCACTGAACCAACTGCTACTGC	(TTC)5	(TTC)5	TTC	105	164	105-164	Polymorphic													NHsA8_c10398_2_aL	CAGTTTTCCCAGTCACGACCTCTCAATCCCATAACAAACAGCC		yam_O_contig_124_b	Oc_124_bL	TTC	3	15	(TTC)	5	(TTC)5			Oc_124_bL	(TTC)5			Oc_124_bL	TTC				Oc_124_b	Oc_124_bL	105
Oc_6191_aL	CAGTTTTCCCAGTCACGACGAGGTTGCAGGTGAGGGTAAAAGT	Oc_6191_aR	GTTTTCCAATCCAATTCACTCATCCTCT	(AGA)5	(AGA)5	AGA	185	213	185-213	Polymorphic													NHsA8_c10400_3_aL	CAGTTTTCCCAGTCACGACGGCTGCAGCTGAGTTAGGTTAAGA		yam_O_contig_6191_a	Oc_6191_aL	AGA	3	15	(AGA)	5	(AGA)5			Oc_6191_aL	(AGA)5			Oc_6191_aL	AGA				Oc_6191_a	Oc_6191_aL	185
Os87_c1821_aL	CAGTTTTCCCAGTCACGACTGTATGCCGAACAAAGACAGAAGA	Os87_c1821_aR	GTTTACACCCATTTCAAGGAAAACAATACT	(TTG)5	(TTG)5	TTG	0	0	-	Didn't Work													NHsA8_c10833_2_aL	CAGTTTTCCCAGTCACGACGGATTGATTTGTCAACAATTCTCAAAA		yam_O_singleton_87-01091-33_1_c1821_a	Os87_c1821_aL	TTG	3	15	(TTG)	5	(TTG)5			Os87_c1821_aL	(TTG)5			Os87_c1821_aL	TTG				Os87_c1821_a	Os87_c1821_aL
Oc_3193_aL	CAGTTTTCCCAGTCACGACTTCTCCTCAACTGCTCCAATCTCT	Oc_3193_aR	GTTTCGTTCTCCAGATCTTCTTTTGGAA	(CTC)5	(CTC)5	CTC	224	227	224-227	Polymorphic													NHsA8_c11631_2_aL	CAGTTTTCCCAGTCACGACTGATCTCACCCAGAAACCCTAACT		yam_O_contig_3193_a	Oc_3193_aL	CTC	3	15	(CTC)	5	(CTC)5			Oc_3193_aL	(CTC)5			Oc_3193_aL	CTC				Oc_3193_a	Oc_3193_aL	224
Os87_lrc8973_aL	CAGTTTTCCCAGTCACGACAGAGTCCATTGAAGTTACCTCCCC	Os87_lrc8973_aR	GTTTTGTTTGTCAATGTTTTTGTTTGGTG	(AAC)5	(AAC)5	AAC	128	128	128-128	Monomorphic													NHsA8_c12903_2_aL	CAGTTTTCCCAGTCACGACAGCAAGCCTAGGATCACTGACAAT		yam_O_singleton_87-01091-33_1_lrc8973_a	Os87_lrc8973_aL	AAC	3	15	(AAC)	5	(AAC)5			Os87_lrc8973_aL	(AAC)5			Os87_lrc8973_aL	AAC				Os87_lrc8973_a	Os87_lrc8973_aL	128
Oc_199_aL	CAGTTTTCCCAGTCACGACGAAACAGATCCCAAAACCGACTC	Oc_199_aR	GTTTAGTGCTTGCTTCGTCCTTCTTTT	(CGC)5	(CGC)5	CGC	141	141	141-141	Monomorphic													NHsA8_c13825_2_aL	CAGTTTTCCCAGTCACGACCCACAAGTAGTTGATCAGACCGTG		yam_O_contig_199_a	Oc_199_aL	CGC	3	15	(CGC)	5	(CGC)5			Oc_199_aL	(CGC)5			Oc_199_aL	CGC				Oc_199_a	Oc_199_aL	141
Oc_6746_aL	CAGTTTTCCCAGTCACGACCGTTATCTTTGGGGTGAAAACCTT	Oc_6746_aR	GTTTATTGAAACATCCTCTTCATCCAGG	(GAT)5	(GAT)5	GAT	118	122	118-122	Polymorphic													NHsA8_c13943_2_aL	CAGTTTTCCCAGTCACGACTAAGGACACCATTTCTGACTGTGC		yam_O_contig_6746_a	Oc_6746_aL	GAT	3	15	(GAT)	5	(GAT)5			Oc_6746_aL	(GAT)5			Oc_6746_aL	GAT				Oc_6746_a	Oc_6746_aL	118
Oc_2069_aL	CAGTTTTCCCAGTCACGACCTACTGACCGAACAAGTGGACCTC	Oc_2069_aR	GTTTACCATAGCCACCACCTCCATAGT	(TGG)5	(TGG)5	TGG	168	168	168-168	Monomorphic													NHsA8_c2056_3_aL	CAGTTTTCCCAGTCACGACGGACACATTCTCAACCAAAGAACC		yam_O_contig_2069_a	Oc_2069_aL	TGG	3	15	(TGG)	5	(TGG)5			Oc_2069_aL	(TGG)5			Oc_2069_aL	TGG				Oc_2069_a	Oc_2069_aL	168
Oc_6621_aL	CAGTTTTCCCAGTCACGACGGTTGGAGTTTGTTGGTTTGAGAT	Oc_6621_aR	GTTTAACCTCAGCTGAAGATGAATGACA	(GAG)5	(GAG)5	GAG	165	165	165-165	Monomorphic													NHsA8_c5868_4_aL	CAGTTTTCCCAGTCACGACTCAGATCGTGGTGAAAAGATCGTA		yam_O_contig_6621_a	Oc_6621_aL	GAG	3	15	(GAG)	5	(GAG)5			Oc_6621_aL	(GAG)5			Oc_6621_aL	GAG				Oc_6621_a	Oc_6621_aL	165
Oc_5843_aL	CAGTTTTCCCAGTCACGACCAAAATAATTCAACCAAACACTTGGA	Oc_5843_aR	GTTTCGGAGATAAGGATGCTTGATATGAT	(AAG)5	(AAG)5	AAG	100	106	100-106	Polymorphic													NHsA8_c6203_7_aL	CAGTTTTCCCAGTCACGACAAAGCAGTGATCTTGCAGGACTGT		yam_O_contig_5843_a	Oc_5843_aL	AAG	3	15	(AAG)	5	(AAG)5			Oc_5843_aL	(AAG)5			Oc_5843_aL	AAG				Oc_5843_a	Oc_5843_aL	100
Oc_2059_aL	CAGTTTTCCCAGTCACGACAAAATAAACAAAGGACACCGATGC	Oc_2059_aR	GTTTCTCTTCCTTCATGTACCAGCAGTG	(AGA)5	(AGA)5	AGA	146	152	146-152	Polymorphic													NHsA8_c6820_3_aL	CAGTTTTCCCAGTCACGACAAGTAGCGTTGAAAGGGGCAG		yam_O_contig_2059_a	Oc_2059_aL	AGA	3	15	(AGA)	5	(AGA)5			Oc_2059_aL	(AGA)5			Oc_2059_aL	AGA				Oc_2059_a	Oc_2059_aL	146
Os87_c7813_aL	CAGTTTTCCCAGTCACGACCCTCCATGACCCATCATAAAAGAA	Os87_c7813_aR	GTTTTCCTCTTCATCTAGTCGTTCCCAC	(GAA)5	(GAA)5	GAA	0	0	-	Didn't Work													NHsA8_c7687_4_aL	CAGTTTTCCCAGTCACGACACTCTTCCCTTTCTCATGATGTGC		yam_O_singleton_87-01091-33_1_c7813_a	Os87_c7813_aL	GAA	3	15	(GAA)	5	(GAA)5			Os87_c7813_aL	(GAA)5			Os87_c7813_aL	GAA				Os87_c7813_a	Os87_c7813_aL
Oc_6974_aL	CAGTTTTCCCAGTCACGACTTTTTGCGCCTATTTATCATCACC	Oc_6974_aR	GTTTACAGTAGCAGCAGCAACATCTTTG	(CCA)5	(CCA)5	CCA	160	163	160-163	Polymorphic													NHsA8_c9247_2_aL	CAGTTTTCCCAGTCACGACGACTTCTATGCTTGCCATTGATGA		yam_O_contig_6974_a	Oc_6974_aL	CCA	3	15	(CCA)	5	(CCA)5			Oc_6974_aL	(CCA)5			Oc_6974_aL	CCA				Oc_6974_a	Oc_6974_aL	160
Oc_1561_aL	CAGTTTTCCCAGTCACGACTAAGCCATCATGGGAATGGTACAC	Oc_1561_aR	GTTTAAAATCCATGGCGTCCGAAG	(GTG)5	(GTG)5	GTG	235	235	235-235	Monomorphic													NHsA8_c9425_2_aL	CAGTTTTCCCAGTCACGACGAAAACAAAGAGAAATCGCGAGG		yam_O_contig_1561_a	Oc_1561_aL	GTG	3	15	(GTG)	5	(GTG)5			Oc_1561_aL	(GTG)5			Oc_1561_aL	GTG				Oc_1561_a	Oc_1561_aL	235
Oc_2051cL	CAGTTTTCCCAGTCACGACAGCTGCAACAGCAACAACAGTTAC	Oc_2051cR	GTTTACAGTCTGCTGGCCAATTTGTT	(CAG)5	(CAG)5	CAG	233	233	233-233	Monomorphic													NHsB9_c10434_2_aL	CAGTTTTCCCAGTCACGACTGAGAGGTGAGCTAGCTTTCCAGA		yam_O_contig_2051_c	Oc_2051cL	CAG	3	15	(CAG)	5	(CAG)5			Oc_2051cL	(CAG)5			Oc_2051cL	CAG				Oc_2051c	Oc_2051cL	233
Oc_5521_aL	CAGTTTTCCCAGTCACGACGATTTCTCTCCCCCAAAACTCATT	Oc_5521_aR	GTTTTTGCTTCTTTGTATATGCAGCACAC	(TAT)5	(TAT)5	TAT	179	242	179-242	Polymorphic													NHsB9_c10590_2_aL	CAGTTTTCCCAGTCACGACAAAGGACATCTTAATAAATTTTTCTCCA		yam_O_contig_5521_a	Oc_5521_aL	TAT	3	15	(TAT)	5	(TAT)5			Oc_5521_aL	(TAT)5			Oc_5521_aL	TAT				Oc_5521_a	Oc_5521_aL	179
OsB9_c12527_2_aL	CAGTTTTCCCAGTCACGACCAGAAATGGAGAAAAATTCCGAGA	OsB9_c12527_2_aR	GTTTTCATTCTTCAACCGGAGTCTATTTC	(GAT)5	(GAT)5	GAT	0	0	-	Didn't Work													NHsB9_c11360_2_aL	CAGTTTTCCCAGTCACGACAGAGAGCAAAGAGGCATTGGG		yam_O_singleton_B310-33_9_c12527_2_a	OsB9_c12527_2_aL	GAT	3	15	(GAT)	5	(GAT)5			OsB9_c12527_2_aL	(GAT)5			OsB9_c12527_2_aL	GAT				OsB9_c12527_2_a	OsB9_c12527_2_aL
Oc_7235_aL	CAGTTTTCCCAGTCACGACTGCGTCAAATACTTCTGAAGCTGA	Oc_7235_aR	GTTTCTTTAGGGGAACCCTGTTTCTTTG	(ACC)5	(ACC)5	ACC	148	167	148-167	Polymorphic													NHsB9_c11441_2_aL	CAGTTTTCCCAGTCACGACCTCAGTGTTGCTGAAGATGACGAT		yam_O_contig_7235_a	Oc_7235_aL	ACC	3	15	(ACC)	5	(ACC)5			Oc_7235_aL	(ACC)5			Oc_7235_aL	ACC				Oc_7235_a	Oc_7235_aL	148
Oc_3756_aL	CAGTTTTCCCAGTCACGACCTCTCTTGCCTCTCCATTTACAGC	Oc_3756_aR	GTTTAATATCGAGATCCAGAGATGGTGG	(TCT)5	(TCT)5	TCT	124	124	124-124	Monomorphic													NHsB9_c12237_2_aL	CAGTTTTCCCAGTCACGACTGCTTCTTCTTTGAATTTCCCAGT		yam_O_contig_3756_a	Oc_3756_aL	TCT	3	15	(TCT)	5	(TCT)5			Oc_3756_aL	(TCT)5			Oc_3756_aL	TCT				Oc_3756_a	Oc_3756_aL	124
Oc_2014_aL	CAGTTTTCCCAGTCACGACTTCTCCTCCTTCTATTCCTTGATTG	Oc_2014_aR	GTTTTTTACCTTAACAATAGCAGTTCCAAAA	(TTG)5	(TTG)5	TTG	0	0	-	Didn't Work													NHsB9_c12559_2_aL	CAGTTTTCCCAGTCACGACAATCGCAAAGACAACCCATATTGT		yam_O_contig_2014_a	Oc_2014_aL	TTG	3	15	(TTG)	5	(TTG)5			Oc_2014_aL	(TTG)5			Oc_2014_aL	TTG				Oc_2014_a	Oc_2014_aL
Oc_5975_aL	CAGTTTTCCCAGTCACGACGGGATCTCTGGTTTATTTCCGTCT	Oc_5975_aR	GTTTTCAAGGATGCGTCAGATACTTTTG	(GGT)5	(GGT)5	GGT	145	149	145-149	Polymorphic													NHsB9_c13181_2_aL	CAGTTTTCCCAGTCACGACAAAAATGAACCTTATTGCAGGGGT		yam_O_contig_5975_a	Oc_5975_aL	GGT	3	15	(GGT)	5	(GGT)5			Oc_5975_aL	(GGT)5			Oc_5975_aL	GGT				Oc_5975_a	Oc_5975_aL	145
Oc_664_aL	CAGTTTTCCCAGTCACGACCAACACTTTGCTTATGAAAGAGACCA	Oc_664_aR	GTTTTGGTGCCATTGTAGATATGAGAAGA	(TAA)5	(TAA)5	TAA	240	249	240-249	Polymorphic													NHsB9_c4927_7_aL	CAGTTTTCCCAGTCACGACTCCATTTACAGCATAACAGCAGGA		yam_O_contig_664_a	Oc_664_aL	TAA	3	15	(TAA)	5	(TAA)5			Oc_664_aL	(TAA)5			Oc_664_aL	TAA				Oc_664_a	Oc_664_aL	240
Oc_4535_aL	CAGTTTTCCCAGTCACGACCTTTGCTTGAATGTTGATCAGGTG	Oc_4535_aR	GTTTCCAGCTCACATTTCCTGCTTTCTA	(TCA)5	(TCA)5	TCA	492	492	492-492	Monomorphic													NHsB9_c9791_4_dL	CAGTTTTCCCAGTCACGACCTATCCCTCTTCTCTCCCCTCTTG		yam_O_contig_4535_a	Oc_4535_aL	TCA	3	15	(TCA)	5	(TCA)5			Oc_4535_aL	(TCA)5			Oc_4535_aL	TCA				Oc_4535_a	Oc_4535_aL	492
Oc_5488_aL	CAGTTTTCCCAGTCACGACCATCAGGAAGAGCATGATAAACCC	Oc_5488_aR	GTTTGTGGCTTTTGGAAAGTCTCAGGTA	(TGC)5	(TGC)5	TGC	128	132	128-132	Polymorphic													NHc_4071_bL	CAGTTTTCCCAGTCACGACAATTAAAATTGAAGGTAGACTAGGAGCA		yam_O_contig_5488_a	Oc_5488_aL	TGC	3	15	(TGC)	5	(TGC)5			Oc_5488_aL	(TGC)5			Oc_5488_aL	TGC				Oc_5488_a	Oc_5488_aL	128
OsA8_c11264_2_aL	CAGTTTTCCCAGTCACGACATATGGACAACAATGTTTCAGGGG	OsA8_c11264_2_aR	GTTTACATCAACAGGGGTTAATTCCTCA	(TGC)5	(TGC)5	TGC	0	0	-	Didn't Work													NHc_941_aL	CAGTTTTCCCAGTCACGACAACTCTCCGAGCTTGAGTTTTTCA		yam_O_singleton_A328-33_8_c11264_2_a	OsA8_c11264_2_aL	TGC	3	15	(TGC)	5	(TGC)5			OsA8_c11264_2_aL	(TGC)5			OsA8_c11264_2_aL	TGC				OsA8_c11264_2_a	OsA8_c11264_2_aL
Oc_170_bL	CAGTTTTCCCAGTCACGACCTTAGATGCCTTCCACGTGTCTCT	Oc_170_bR	GTTTTCTCATCCTTCTCACCTTATCCCA	(TAT)5	(TAT)5	TAT	157	160	157-160	Polymorphic													NHc_120_aR	GTTTCAATCATCTGCATTGCTTTGAAAC		yam_O_contig_170_b	Oc_170_bL	TAT	3	15	(TAT)	5	(TAT)5			Oc_170_bL	(TAT)5			Oc_170_bL	TAT				Oc_170_b	Oc_170_bL	157
Oc_2065_aL	CAGTTTTCCCAGTCACGACGTTTGGTGACCTCCAATGGATATT	Oc_2065_aR	GTTTAAGGTCGAGTGTTCGTGCTTTATC	(TTG)5	(TTG)5	TTG	173	177	173-177	Polymorphic													NHc_2273_aR	GTTTCTTGAAAGAAAGTCGCATACCTGG		yam_O_contig_2065_a	Oc_2065_aL	TTG	3	15	(TTG)	5	(TTG)5			Oc_2065_aL	(TTG)5			Oc_2065_aL	TTG				Oc_2065_a	Oc_2065_aL	173
Oc_834_aL	CAGTTTTCCCAGTCACGACGATCCGACTCGTCCTTCTCCTC	Oc_834_aR	GTTTGAAGCCCTTGGCATTGTCAG	(CCG)5	(CCG)5	CCG	111	111	111-111	Monomorphic													NHc_4075_aR	GTTTGATGGAGAGCTGCGACATACG		yam_O_contig_834_a	Oc_834_aL	CCG	3	15	(CCG)	5	(CCG)5			Oc_834_aL	(CCG)5			Oc_834_aL	CCG				Oc_834_a	Oc_834_aL	111
Oc_6796_bL	CAGTTTTCCCAGTCACGACTTCCAAATACTTAGCACCAGCTCA	Oc_6796_bR	GTTTACCCAATTGGCTACTTCTTTGTTG	(CAA)5	(CAA)5	CAA	130	130	130-130	Monomorphic													NHc_504_aR	GTTTTGATGCTTTTGAGAATGAAAATGAA		yam_O_contig_6796_b	Oc_6796_bL	CAA	3	15	(CAA)	5	(CAA)5			Oc_6796_bL	(CAA)5			Oc_6796_bL	CAA				Oc_6796_b	Oc_6796_bL	130
Oc_6611_aL	CAGTTTTCCCAGTCACGACAGTCCATCAAACTTAATGTGGACAAA	Oc_6611_aR	GTTTGATGATCACCGGAATTATCAAAGC	(CAT)5	(CAT)5	CAT	168	177	168-177	Polymorphic													NHc_5633_aR	GTTTAAGGAGAAGGTTGAGGAGAAGCTG		yam_O_contig_6611_a	Oc_6611_aL	CAT	3	15	(CAT)	5	(CAT)5			Oc_6611_aL	(CAT)5			Oc_6611_aL	CAT				Oc_6611_a	Oc_6611_aL	168
Os87_lrc5347_aL	CAGTTTTCCCAGTCACGACATGCCTGCAGCTGTTCTATATGC	Os87_lrc5347_aR	GTTTTTCTCATCTGTCCGTCAGTGAAGT	(ATA)5	(ATA)5	ATA	173	173	173-173	Monomorphic													NHc_6025_aR	GTTTATGGTACTTGTTCCTTGCTCTTGC		yam_O_singleton_87-01091-33_1_lrc5347_a	Os87_lrc5347_aL	ATA	3	15	(ATA)	5	(ATA)5			Os87_lrc5347_aL	(ATA)5			Os87_lrc5347_aL	ATA				Os87_lrc5347_a	Os87_lrc5347_aL	173
Oc_3284_bL	CAGTTTTCCCAGTCACGACATGATGAAGTCATGGGGGAGTAGA	Oc_3284_bR	GTTTGTTAAGTCCATCGTCAAAACCCTG	(GCA)5	(GCA)5	GCA	156	174	156-174	Polymorphic													NHc_6117_aR	GTTTAGGAAGAGGAAGAGAAAGAAGGCG		yam_O_contig_3284_b	Oc_3284_bL	GCA	3	15	(GCA)	5	(GCA)5			Oc_3284_bL	(GCA)5			Oc_3284_bL	GCA				Oc_3284_b	Oc_3284_bL	156
Oc_582_aL	CAGTTTTCCCAGTCACGACGTCGAACACTTGATGGGCATAAC	Oc_582_aR	GTTTACAACATCAATCAACATCACACCA	(TAT)5	(TAT)5	TAT	179	183	179-183	Polymorphic													NHc_6145_aR	GTTTTAACTGCAAAAACGCTGCAATATC		yam_O_contig_582_a	Oc_582_aL	TAT	3	15	(TAT)	5	(TAT)5			Oc_582_aL	(TAT)5			Oc_582_aL	TAT				Oc_582_a	Oc_582_aL	179
Oc_2863cL	CAGTTTTCCCAGTCACGACTGATCGACTTCCTAACGGAAAGTT	Oc_2863cR	GTTTAAGTTGAGAGAGCGCTTGATTCAT	(TGA)5	(TGA)5	TGA	235	235	235-235	Monomorphic													NHc_6237_aR	GTTTTCAGGAAGGCGATAATAAACCTGA		yam_O_contig_2863_c	Oc_2863cL	TGA	3	15	(TGA)	5	(TGA)5			Oc_2863cL	(TGA)5			Oc_2863cL	TGA				Oc_2863c	Oc_2863cL	235
Os87_c5505_aL	CAGTTTTCCCAGTCACGACCGTTTCCCCACGAACACTAGAC	Os87_c5505_aR	GTTTGAGACAAGCCGAAGCCTGAC	(CGG)5	(CGG)5	CGG	148	151	148-151	Polymorphic													NHc_6296_aR	GTTTGTTATTTACAATCCTCCCCCTTGC		yam_O_singleton_87-01091-33_1_c5505_a	Os87_c5505_aL	CGG	3	15	(CGG)	5	(CGG)5			Os87_c5505_aL	(CGG)5			Os87_c5505_aL	CGG				Os87_c5505_a	Os87_c5505_aL	148
Oc_6821_aL	CAGTTTTCCCAGTCACGACGCTTTGTTCTGTTTGAGATGGTTT	Oc_6821_aR	GTTTCAAAAGTATGTTCTCTGGTAACATGG	(ATG)5	(ATG)5	ATG	161	161	161-161	Monomorphic													NHc_6686_aR	GTTTTTGGCAGCATGAGATTTCAGTAAA		yam_O_contig_6821_a	Oc_6821_aL	ATG	3	15	(ATG)	5	(ATG)5			Oc_6821_aL	(ATG)5			Oc_6821_aL	ATG				Oc_6821_a	Oc_6821_aL	161
Oc_548_aL	CAGTTTTCCCAGTCACGACGAGACAGATCTCCAGAATGGTGGT	Oc_548_aR	GTTTTGAATCGGCTGAATTCAATTACCT	(TAT)5	(TAT)5	TAT	168	171	168-171	Polymorphic													NHc_6868_aR	GTTTCATATCTAGTCTCCGCGAACAACC		yam_O_contig_548_a	Oc_548_aL	TAT	3	15	(TAT)	5	(TAT)5			Oc_548_aL	(TAT)5			Oc_548_aL	TAT				Oc_548_a	Oc_548_aL	168
Os87_c12339_aL	CAGTTTTCCCAGTCACGACACCTAAGATTTTCTCAACCTCCGC	Os87_c12339_aR	GTTTGCACAGCAAGAATGACAAGAAAGA	(TTC)5	(TTC)5	TTC	179	189	179-189	Polymorphic													NHs87_c10016_aR	GTTTACTACTCTGAAGCTCTCGCTTCCT		yam_O_singleton_87-01091-33_1_c12339_a	Os87_c12339_aL	TTC	3	15	(TTC)	5	(TTC)5			Os87_c12339_aL	(TTC)5			Os87_c12339_aL	TTC				Os87_c12339_a	Os87_c12339_aL	179
OsA8_c12359_2_aL	CAGTTTTCCCAGTCACGACGAAGACCATGATTTCCCTTCTCCT	OsA8_c12359_2_aR	GTTTACTCATCTCCTTCGATCCCTCCT	(CGA)5	(CGA)5	CGA	120	125	120-125	Polymorphic													NHs87_c10831_aR	GTTTTCAATAAAACAAGAGCTCACCGGA		yam_O_singleton_A328-33_8_c12359_2_a	OsA8_c12359_2_aL	CGA	3	15	(CGA)	5	(CGA)5			OsA8_c12359_2_aL	(CGA)5			OsA8_c12359_2_aL	CGA				OsA8_c12359_2_a	OsA8_c12359_2_aL	120
OsB9_c9685_3_aL	CAGTTTTCCCAGTCACGACGCTCATTCTCGTTCCCATGCT	OsB9_c9685_3_aR	GTTTTCAACCCTTTGGATCTAGGGTTTC	(CTC)5	(CTC)5	CTC	144	147	144-147	Polymorphic													NHs87_c10893_aR	GTTTATGGGTTGAAGGTGTTGTTGTAGC		yam_O_singleton_B310-33_9_c9685_3_a	OsB9_c9685_3_aL	CTC	3	15	(CTC)	5	(CTC)5			OsB9_c9685_3_aL	(CTC)5			OsB9_c9685_3_aL	CTC				OsB9_c9685_3_a	OsB9_c9685_3_aL	144
Oc_52_aL	CAGTTTTCCCAGTCACGACAAATCCCAACAACTCCTCTCCTTC	Oc_52_aR	GTTTGCAGTAACAGACAAGAGCTATAGGCA	(AAT)5	(AAT)5	AAT	110	129	110-129	Polymorphic													NHs87_c11241_aR	GTTTCTCTCTTCTTCGTCTTCAACGACC		yam_O_contig_52_a	Oc_52_aL	AAT	3	15	(AAT)	5	(AAT)5			Oc_52_aL	(AAT)5			Oc_52_aL	AAT				Oc_52_a	Oc_52_aL	110
Oc_2014_aL	CAGTTTTCCCAGTCACGACTTCTCCTCCTTCTATTCCTTGATTG	Oc_2014_aR	GTTTTTTACCTTAACAATAGCAGTTCCAAAA	(TTG)5	(TTG)5	TTG	0	0	-	Didn't Work													NHs87_c3681_aR	GTTTAAGGTACAAGATCTGGACCCCTTC		yam_O_contig_2014_a	Oc_2014_aL	TTG	3	15	(TTG)	5	(TTG)5			Oc_2014_aL	(TTG)5			Oc_2014_aL	TTG				Oc_2014_a	Oc_2014_aL
Oc_3238_aL	CAGTTTTCCCAGTCACGACGGTTCTGAACTTTCTCGTGGAGAC	Oc_3238_aR	GTTTATCAAAACTGTTTCCCCGTTTTCT	(AAG)5	(AAG)5	AAG	150	150	150-150	Monomorphic													NHs87_c7757_aR	GTTTGATTGAGGGTCGGAATCATCAC		yam_O_contig_3238_a	Oc_3238_aL	AAG	3	15	(AAG)	5	(AAG)5			Oc_3238_aL	(AAG)5			Oc_3238_aL	AAG				Oc_3238_a	Oc_3238_aL	150
Oc_2920_aL	CAGTTTTCCCAGTCACGACTGGTTGTATAGCAGTGAGACCAGG	Oc_2920_aR	GTTTCAGTACTGATCATCAAACCATTCACA	(GAA)5	(GAA)5	GAA	168	168	168-168	Monomorphic													NHs87_c8503_aR	GTTTGAGGCGAGAAGAGAAGCTACGATA		yam_O_contig_2920_a	Oc_2920_aL	GAA	3	15	(GAA)	5	(GAA)5			Oc_2920_aL	(GAA)5			Oc_2920_aL	GAA				Oc_2920_a	Oc_2920_aL	168
Oc_769_aL	CAGTTTTCCCAGTCACGACGATCCACCCTTTCATGCCAAC	Oc_769_aR	GTTTCTTCATGTTCCTGGTGCTAAGGAT	(CCT)5	(CCT)5	CCT	161	161	161-161	Monomorphic													NHs87_c8985_aR	GTTTGACTGGTAGGTTGGGAAACCTCTT		yam_O_contig_769_a	Oc_769_aL	CCT	3	15	(CCT)	5	(CCT)5			Oc_769_aL	(CCT)5			Oc_769_aL	CCT				Oc_769_a	Oc_769_aL	161
Oc_1358_aL	CAGTTTTCCCAGTCACGACTCTGTGCTTAGGACTCAGATGGTG	Oc_1358_aR	GTTTCCATTGCTGCCAATACTGTTGTTA	(CAG)5	(CAG)5	CAG	158	158	158-158	Monomorphic													NHs87_lrc9008_aR	GTTTTCACAAGAGCTCTAATTGGCCTTC		yam_O_contig_1358_a	Oc_1358_aL	CAG	3	15	(CAG)	5	(CAG)5			Oc_1358_aL	(CAG)5			Oc_1358_aL	CAG				Oc_1358_a	Oc_1358_aL	158
Oc_1006_aL	CAGTTTTCCCAGTCACGACACTATGACAGCAGAAGAGGCCG	Oc_1006_aR	GTTTCTCAGCAAATGCTTGTGCTTCTT	(GCT)5	(GCT)5	GCT	162	162	162-162	Monomorphic													NHs87_lrc9455_aR	GTTTAGGCACATTATTCACCATTATCGG		yam_O_contig_1006_a	Oc_1006_aL	GCT	3	15	(GCT)	5	(GCT)5			Oc_1006_aL	(GCT)5			Oc_1006_aL	GCT				Oc_1006_a	Oc_1006_aL	162
OsB9_c9412_3_aL	CAGTTTTCCCAGTCACGACGGTCCAAGGATACTGGAGTCAAGA	OsB9_c9412_3_aR	GTTTACACCATGAGTTCTGTTCTGCTTC	(AGA)5	(AGA)5	AGA	249	249	249-249	Monomorphic													NHsA8_c10143_2_aR	GTTTGCTTGAATGACACCAAGTTCTGG		yam_O_singleton_B310-33_9_c9412_3_a	OsB9_c9412_3_aL	AGA	3	15	(AGA)	5	(AGA)5			OsB9_c9412_3_aL	(AGA)5			OsB9_c9412_3_aL	AGA				OsB9_c9412_3_a	OsB9_c9412_3_aL	249
Oc_2519cL	CAGTTTTCCCAGTCACGACAGTTTGTTTCACTGTCTGCCTGGT	Oc_2519cR	GTTTACAACATGTTCGTGTTCACGCTAT	(TCA)5	(TCA)5	TCA	0	0	-	Didn't Work													NHsA8_c10398_2_aR	GTTTTCTGGTGAAGTCCAGAGAAGGAGT		yam_O_contig_2519_c	Oc_2519cL	TCA	3	15	(TCA)	5	(TCA)5			Oc_2519cL	(TCA)5			Oc_2519cL	TCA				Oc_2519c	Oc_2519cL
Oc_1797cL	CAGTTTTCCCAGTCACGACAGAATGCTAAGGAAGTGCCTGATG	Oc_1797cR	GTTTTGATTGCTCAATAGCAGTACCAATG	(TAT)5	(TAT)5	TAT	0	0	-	Didn't Work													NHsA8_c10400_3_aR	GTTTTCTCTGCTGGTTATGAATGGTTGA		yam_O_contig_1797_c	Oc_1797cL	TAT	3	15	(TAT)	5	(TAT)5			Oc_1797cL	(TAT)5			Oc_1797cL	TAT				Oc_1797c	Oc_1797cL
Oc_70_aL	CAGTTTTCCCAGTCACGACCTTCTGGTGATGATGATGGAGATG	Oc_70_aR	GTTTCTCCTTCTCCAACCTCCTCTGTTT	(TGA)5	(TGA)5	TGA	127	162	127-162	Polymorphic													NHsA8_c10833_2_aR	GTTTGATGGACGACGATGATATTGTGTG		yam_O_contig_70_a	Oc_70_aL	TGA	3	15	(TGA)	5	(TGA)5			Oc_70_aL	(TGA)5			Oc_70_aL	TGA				Oc_70_a	Oc_70_aL	127
Oc_5579_aL	CAGTTTTCCCAGTCACGACGAGAAACAAAGCTATGGCCTGAAA	Oc_5579_aR	GTTTGTTTGATGAAATGACACCAACCTG	(GAT)5	(GAT)5	GAT	176	176	176-176	Monomorphic													NHsA8_c11631_2_aR	GTTTCTTGTTAAGAAGCCACACAAATTCA		yam_O_contig_5579_a	Oc_5579_aL	GAT	3	15	(GAT)	5	(GAT)5			Oc_5579_aL	(GAT)5			Oc_5579_aL	GAT				Oc_5579_a	Oc_5579_aL	176
Oc_4886_aL	CAGTTTTCCCAGTCACGACATCACGAAAACGGAGAAAGAGAGA	Oc_4886_aR	GTTTTTGACCATAGTTGATCCCGAAACT	(TCT)5	(TCT)5	TCT	0	0	-	Didn't Work													NHsA8_c12903_2_aR	GTTTTGTTATCCATGGAAGTCTTAGCCA		yam_O_contig_4886_a	Oc_4886_aL	TCT	3	15	(TCT)	5	(TCT)5			Oc_4886_aL	(TCT)5			Oc_4886_aL	TCT				Oc_4886_a	Oc_4886_aL
OsB9_c12420_2_aL	CAGTTTTCCCAGTCACGACGGTTTGAAAATCATGAACCTTGGA	OsB9_c12420_2_aR	GTTTTCTTCATCACTTTCTTCACCACCA	(ATG)5	(ATG)5	ATG	162	162	162-162	Monomorphic													NHsA8_c13825_2_aR	GTTTCTTTTGCTCTGATTCCTCCTCAAG		yam_O_singleton_B310-33_9_c12420_2_a	OsB9_c12420_2_aL	ATG	3	15	(ATG)	5	(ATG)5			OsB9_c12420_2_aL	(ATG)5			OsB9_c12420_2_aL	ATG				OsB9_c12420_2_a	OsB9_c12420_2_aL	162
Oc_971_aL	CAGTTTTCCCAGTCACGACTCGTAGCTCGAGTTTCTCTTTTGT	Oc_971_aR	GTTTTGGCTAATAGAAGCAACAAGATCG	(TCT)5	(TCT)5	TCT	0	0	-	Didn't Work													NHsA8_c13943_2_aR	GTTTAAACAACAGCAGCAGGTTACAGGT		yam_O_contig_971_a	Oc_971_aL	TCT	3	15	(TCT)	5	(TCT)5			Oc_971_aL	(TCT)5			Oc_971_aL	TCT				Oc_971_a	Oc_971_aL
Oc_1708_aL	CAGTTTTCCCAGTCACGACACATGCCTCTCAAGTTCCTCAATC	Oc_1708_aR	GTTTCTGTAATATGCTGCTGTACCGACG	(TCC)5	(TCC)5	TCC	112	115	112-115	Polymorphic													NHsA8_c2056_3_aR	GTTTATCTGCAGCAAAGTGAACAAACAA		yam_O_contig_1708_a	Oc_1708_aL	TCC	3	15	(TCC)	5	(TCC)5			Oc_1708_aL	(TCC)5			Oc_1708_aL	TCC				Oc_1708_a	Oc_1708_aL	112
Oc_5040_aL	CAGTTTTCCCAGTCACGACTCTGAGATACTAGGAGCTGAGCCA	Oc_5040_aR	GTTTGGTTGGAGCTTGTTGCGTTAGTA	(AGG)5	(AGG)5	AGG	114	114	114-114	Monomorphic													NHsA8_c5868_4_aR	GTTTAGATCACAAATCCCCATCAGAAAA		yam_O_contig_5040_a	Oc_5040_aL	AGG	3	15	(AGG)	5	(AGG)5			Oc_5040_aL	(AGG)5			Oc_5040_aL	AGG				Oc_5040_a	Oc_5040_aL	114
Oc_5040_bL	CAGTTTTCCCAGTCACGACTGGACTCTCACTTGAGGTTACACTG	Oc_5040_bR	GTTTTGAGCAATCCTGTATTCTTTGGTTC	(AAG)5	(AAG)5	AAG	149	152	149-152	Polymorphic													NHsA8_c6203_7_aR	GTTTAGGCACAAACCATGTCCAAATATC		yam_O_contig_5040_b	Oc_5040_bL	AAG	3	15	(AAG)	5	(AAG)5			Oc_5040_bL	(AAG)5			Oc_5040_bL	AAG				Oc_5040_b	Oc_5040_bL	149
OsA8_c9342_3_aL	CAGTTTTCCCAGTCACGACATCATCTCTACAACACCACCAGCA	OsA8_c9342_3_aR	GTTTTTTGGAGGAGATGGACTTATGGAA	(CAA)5	(CAA)5	CAA	178	181	178-181	Polymorphic													NHsA8_c6820_3_aR	GTTTACTGCCAACTTCTAGGAGAGGTGA		yam_O_singleton_A328-33_8_c9342_3_a	OsA8_c9342_3_aL	CAA	3	15	(CAA)	5	(CAA)5			OsA8_c9342_3_aL	(CAA)5			OsA8_c9342_3_aL	CAA				OsA8_c9342_3_a	OsA8_c9342_3_aL	178
Oc_5921_aL	CAGTTTTCCCAGTCACGACTATTGAGGCTCTTTTTATGCCCAA	Oc_5921_aR	GTTTTAGTGATGGTTACCGTGGTTCTCA	(TCC)5	(TCC)5	TCC	340	340	340-340	Monomorphic													NHsA8_c7687_4_aR	GTTTATTCTCCCTTCCAAATTTCAAACC		yam_O_contig_5921_a	Oc_5921_aL	TCC	3	15	(TCC)	5	(TCC)5			Oc_5921_aL	(TCC)5			Oc_5921_aL	TCC				Oc_5921_a	Oc_5921_aL	340
Oc_2671_aL	CAGTTTTCCCAGTCACGACAACAGTATGAGGCTGAGATAGCCG	Oc_2671_aR	GTTTCATGCAAAGTAGAACACAAATGGC	(GAT)5	(GAT)5	GAT	145	149	145-149	Polymorphic													NHsA8_c9247_2_aR	GTTTCCTCACACAAACGTCGAATTTACA		yam_O_contig_2671_a	Oc_2671_aL	GAT	3	15	(GAT)	5	(GAT)5			Oc_2671_aL	(GAT)5			Oc_2671_aL	GAT				Oc_2671_a	Oc_2671_aL	145
Oc_5108_aL	CAGTTTTCCCAGTCACGACCTCAACCATGGCCGTCTTGT	Oc_5108_aR	GTTTGTAGTAGCGAGGGAGAGGAGAAGG	(CCG)5	(CCG)5	CCG	104	267	104-267	Polymorphic													NHsA8_c9425_2_aR	GTTTCTTCTTTCCAAGGTCTTCCAGCTT		yam_O_contig_5108_a	Oc_5108_aL	CCG	3	15	(CCG)	5	(CCG)5			Oc_5108_aL	(CCG)5			Oc_5108_aL	CCG				Oc_5108_a	Oc_5108_aL	104
Oc_317_aL	CAGTTTTCCCAGTCACGACGTGCCACAGTGTTACTGATCCTTG	Oc_317_aR	GTTTCACAATCAAATCAAACATATCATGTGG	(TCT)5	(TCT)5	TCT	184	184	184-184	Monomorphic													NHsB9_c10434_2_aR	GTTTGCAACAACCAAATCCAAAAGTGTT		yam_O_contig_317_a	Oc_317_aL	TCT	3	15	(TCT)	5	(TCT)5			Oc_317_aL	(TCT)5			Oc_317_aL	TCT				Oc_317_a	Oc_317_aL	184
Oc_2948_aL	CAGTTTTCCCAGTCACGACACGAAGACCTGATATATTTCCGCA	Oc_2948_aR	GTTTTTTCAGGATCCTCCTCTTCTTCCT	(GAA)5	(GAA)5	GAA	154	154	154-154	Monomorphic													NHsB9_c10590_2_aR	GTTTTATTTTCACGGTTCTTGGACATTT		yam_O_contig_2948_a	Oc_2948_aL	GAA	3	15	(GAA)	5	(GAA)5			Oc_2948_aL	(GAA)5			Oc_2948_aL	GAA				Oc_2948_a	Oc_2948_aL	154
OsB9_c14687_2_aL	CAGTTTTCCCAGTCACGACTGCATACCCCTTCTAACACAATCA	OsB9_c14687_2_aR	GTTTGAGATGGTGGAGAAGGTAAAGGGT	(TCA)5	(TCA)5	TCA	172	175	172-175	Polymorphic													NHsB9_c11360_2_aR	GTTTGAAGTTGCCATCCTCCTGAGTTC		yam_O_singleton_B310-33_9_c14687_2_a	OsB9_c14687_2_aL	TCA	3	15	(TCA)	5	(TCA)5			OsB9_c14687_2_aL	(TCA)5			OsB9_c14687_2_aL	TCA				OsB9_c14687_2_a	OsB9_c14687_2_aL	172
Oc_214_aL	CAGTTTTCCCAGTCACGACAAATGAATGATGTTTGTGTTTGTTG	Oc_214_aR	GTTTCAAAAGCAATTCATTAGCACTCAA	(GTG)5	(GTG)5	GTG	115	118	115-118	Polymorphic													NHsB9_c11441_2_aR	GTTTACCTACAGAGTTAAGCCTTGACCG		yam_O_contig_214_a	Oc_214_aL	GTG	3	15	(GTG)	5	(GTG)5			Oc_214_aL	(GTG)5			Oc_214_aL	GTG				Oc_214_a	Oc_214_aL	115
Oc_2609_bL	CAGTTTTCCCAGTCACGACCAGCAGCAGCAATGGAGATTAGTA	Oc_2609_bR	GTTTATCCCAGTTGTTCTGTGATGGATT	(TGG)5	(TGG)5	TGG	181	181	181-181	Monomorphic													NHsB9_c12237_2_aR	GTTTTCCATGGTTGACTCTCTAGGCTTC		yam_O_contig_2609_b	Oc_2609_bL	TGG	3	15	(TGG)	5	(TGG)5			Oc_2609_bL	(TGG)5			Oc_2609_bL	TGG				Oc_2609_b	Oc_2609_bL	181
Oc_5715_aL	CAGTTTTCCCAGTCACGACAGGCATTGAGCTGCATAAATTACC	Oc_5715_aR	GTTTAAAGAAACACCATGGAGACGAAGA	(TCA)5	(TCA)5	TCA	182	182	182-182	Monomorphic													NHsB9_c12559_2_aR	GTTTATGGCTTTGCATTAGAGGACTTGT		yam_O_contig_5715_a	Oc_5715_aL	TCA	3	15	(TCA)	5	(TCA)5			Oc_5715_aL	(TCA)5			Oc_5715_aL	TCA				Oc_5715_a	Oc_5715_aL	182
Oc_6940_aL	CAGTTTTCCCAGTCACGACGAATGGTCAGTCTTCAAGCCAATC	Oc_6940_aR	GTTTAGTTCATGGCAAAACCTTCACAAT	(GTT)5	(GTT)5	GTT	176	187	176-187	Polymorphic													NHsB9_c13181_2_aR	GTTTTGCACTTTCATACCCCATTTATCC		yam_O_contig_6940_a	Oc_6940_aL	GTT	3	15	(GTT)	5	(GTT)5			Oc_6940_aL	(GTT)5			Oc_6940_aL	GTT				Oc_6940_a	Oc_6940_aL	176
Oc_3414_aL	CAGTTTTCCCAGTCACGACCGTGGGAAGGAGGAAGAAGAAG	Oc_3414_aR	GTTTAGTAAACTGCGCAAGGATTGACTG	(GAG)5	(GAG)5	GAG	307	310	307-310	Polymorphic													NHsB9_c4927_7_aR	GTTTCCTGCTTATTCATTGTGTTGGTAGC		yam_O_contig_3414_a	Oc_3414_aL	GAG	3	15	(GAG)	5	(GAG)5			Oc_3414_aL	(GAG)5			Oc_3414_aL	GAG				Oc_3414_a	Oc_3414_aL	307
Oc_728_aL	CAGTTTTCCCAGTCACGACGTAAAATCCACCAAAGAACCACCA	Oc_728_aR	GTTTACTGCTGCTTCACTCATCATCATC	(TGA)5	(TGA)5	TGA	257	257	257-257	Monomorphic													NHsB9_c9791_4_dR	GTTTCTCTTTGCCTCAGCTCTTGATGAT		yam_O_contig_728_a	Oc_728_aL	TGA	3	15	(TGA)	5	(TGA)5			Oc_728_aL	(TGA)5			Oc_728_aL	TGA				Oc_728_a	Oc_728_aL	257
Oc_5145_aL	CAGTTTTCCCAGTCACGACGAGTCGTAACTCGTTGGGACAATC	Oc_5145_aR	GTTTACGAGCAGGGAACAAGATTCTG	(GTG)5	(GTG)5	GTG	145	151	145-151	Polymorphic													NHc_4071_bR	GTTTATACCCATCCTACGGTCCTTATTC		yam_O_contig_5145_a	Oc_5145_aL	GTG	3	15	(GTG)	5	(GTG)5			Oc_5145_aL	(GTG)5			Oc_5145_aL	GTG				Oc_5145_a	Oc_5145_aL	145
Oc_4929_aL	CAGTTTTCCCAGTCACGACCGGGATGAAAACTCTCTCCTTTTT	Oc_4929_aR	GTTTGACGATGTCGAGCTCATCCTTC	(TCT)5	(TCT)5	TCT	161	161	161-161	Monomorphic													NHc_941_aR	GTTTTTGTTCATTGATGAAGCTCTTTCTTG		yam_O_contig_4929_a	Oc_4929_aL	TCT	3	15	(TCT)	5	(TCT)5			Oc_4929_aL	(TCT)5			Oc_4929_aL	TCT				Oc_4929_a	Oc_4929_aL	161
Oc_5095_bL	CAGTTTTCCCAGTCACGACTTTTGTGAAAAACTCTTGCAAATCA	Oc_5095_bR	GTTTCACTTTCCCAACTTTCACATACACA	(GAT)5	(GAT)5	GAT	110	120	110-120	Polymorphic																yam_O_contig_5095_b	Oc_5095_bL	GAT	3	15	(GAT)	5	(GAT)5			Oc_5095_bL	(GAT)5			Oc_5095_bL	GAT				Oc_5095_b	Oc_5095_bL	110
Oc_3270_aL	CAGTTTTCCCAGTCACGACGTTAGGTTAAGTTCCCTGCTTGCC	Oc_3270_aR	GTTTGGAAGCCATGCTTGGTGTTTATAG	(CAA)5	(CAA)5	CAA	137	137	137-137	Monomorphic													NHs87_c5029_aL	CAGTTTTCCCAGTCACGACTTCCAGTCCTAGTCCTCCTAACCC		yam_O_contig_3270_a	Oc_3270_aL	CAA	3	15	(CAA)	5	(CAA)5			Oc_3270_aL	(CAA)5			Oc_3270_aL	CAA				Oc_3270_a	Oc_3270_aL	137
Oc_2681_aL	CAGTTTTCCCAGTCACGACCGCTGATCTGATAATAGCTATAAAATGC	Oc_2681_aR	GTTTTCATGATGCAGCTGTATGTGAGTC	(ATT)5	(ATT)5	ATT	139	139	139-139	Monomorphic													NHsA8_c13489_2_aL	CAGTTTTCCCAGTCACGACGGTGGACATGGCACTGGTTTA		yam_O_contig_2681_a	Oc_2681_aL	ATT	3	15	(ATT)	5	(ATT)5			Oc_2681_aL	(ATT)5			Oc_2681_aL	ATT				Oc_2681_a	Oc_2681_aL	139
Oc_5865_aL	CAGTTTTCCCAGTCACGACCACATGCTCATGCTAGCTATTCCA	Oc_5865_aR	GTTTAATCAGCCATGTATCCTATCCCAA	(ATC)5	(ATC)5	ATC	153	153	153-153	Monomorphic													NHc_127cL	CAGTTTTCCCAGTCACGACGTGGTTATGGTGTTGGCTATGGT		yam_O_contig_5865_a	Oc_5865_aL	ATC	3	15	(ATC)	5	(ATC)5			Oc_5865_aL	(ATC)5			Oc_5865_aL	ATC				Oc_5865_a	Oc_5865_aL	153
Oc_1426_aL	CAGTTTTCCCAGTCACGACCCATACAGCAAATGGAAAACAAAA	Oc_1426_aR	GTTTATGATGAACCTTCTTCAACCGAGT	(GTG)5	(GTG)5	GTG	142	142	142-142	Monomorphic													NHc_131_bL	CAGTTTTCCCAGTCACGACTGTTAATTGTTTCATGCCCATCAT		yam_O_contig_1426_a	Oc_1426_aL	GTG	3	15	(GTG)	5	(GTG)5			Oc_1426_aL	(GTG)5			Oc_1426_aL	GTG				Oc_1426_a	Oc_1426_aL	142
Oc_915_aL	CAGTTTTCCCAGTCACGACCCCGGGATGTTTGATAGATACAGA	Oc_915_aR	GTTTCAAGGATCATAACCTGCTGGAGTT	(CAT)5	(CAT)5	CAT	255	255	255-255	Monomorphic													NHc_3405_aL	CAGTTTTCCCAGTCACGACCCATTTTTGTAGCTTGGTCAGAAC		yam_O_contig_915_a	Oc_915_aL	CAT	3	15	(CAT)	5	(CAT)5			Oc_915_aL	(CAT)5			Oc_915_aL	CAT				Oc_915_a	Oc_915_aL	255
Oc_6977_aL	CAGTTTTCCCAGTCACGACTGGGGAAGAAGCTTTAATTCAACA	Oc_6977_aR	GTTTATAAAGCAGTCTCAGCCTCAGCAT	(CAT)5	(CAT)5	CAT	156	156	156-156	Monomorphic													NHc_5174_aL	CAGTTTTCCCAGTCACGACGCCTCTCACTAACACATTCATCCA		yam_O_contig_6977_a	Oc_6977_aL	CAT	3	15	(CAT)	5	(CAT)5			Oc_6977_aL	(CAT)5			Oc_6977_aL	CAT				Oc_6977_a	Oc_6977_aL	156
Oc_3142_aL	CAGTTTTCCCAGTCACGACCAAATCAGGAATTTGCTCACACAG	Oc_3142_aR	GTTTATTGGAGTGGTTGTTTGGGGT	(CAG)5	(CAG)5	CAG	107	107	107-107	Monomorphic													NHc_5324_aL	CAGTTTTCCCAGTCACGACTTGGAAAGAAACCACTACAAAGCC		yam_O_contig_3142_a	Oc_3142_aL	CAG	3	15	(CAG)	5	(CAG)5			Oc_3142_aL	(CAG)5			Oc_3142_aL	CAG				Oc_3142_a	Oc_3142_aL	107
Oc_6560cL	CAGTTTTCCCAGTCACGACAAGGAAAAGGAAGACGAAGAAGGA	Oc_6560cR	GTTTGGAATCGGAGATGGAATCAGAAC	(GAG)5	(GAG)5	GAG	171	171	171-171	Monomorphic													NHc_5914_aL	CAGTTTTCCCAGTCACGACAGTGATGGAAGGGTAATTCGGTAA		yam_O_contig_6560_c	Oc_6560cL	GAG	3	15	(GAG)	5	(GAG)5			Oc_6560cL	(GAG)5			Oc_6560cL	GAG				Oc_6560c	Oc_6560cL	171
Oc_280_aL	CAGTTTTCCCAGTCACGACAAGCCTGAGTGTGATAAGGCTTTG	Oc_280_aR	GTTTTCAAAGCAAGCAATTACATTTAACAGA	(TCT)5	(TCT)5	TCT	165	177	165-177	Polymorphic													NHc_7134_aL	CAGTTTTCCCAGTCACGACAACACAACAAAGGATTTCCACACA		yam_O_contig_280_a	Oc_280_aL	TCT	3	15	(TCT)	5	(TCT)5			Oc_280_aL	(TCT)5			Oc_280_aL	TCT				Oc_280_a	Oc_280_aL	165
Oc_4923_aL	CAGTTTTCCCAGTCACGACAGTGGGGTAGTGTGTTCATGGTTT	Oc_4923_aR	GTTTGAACAAAGCTGCCTTTCATACACC	(AGA)5	(AGA)5	AGA	143	143	143-143	Monomorphic													NHs87_c5013_aL	CAGTTTTCCCAGTCACGACTTTTCTTGGAATCTATGAGCAGGC		yam_O_contig_4923_a	Oc_4923_aL	AGA	3	15	(AGA)	5	(AGA)5			Oc_4923_aL	(AGA)5			Oc_4923_aL	AGA				Oc_4923_a	Oc_4923_aL	143
Oc_3584_aL	CAGTTTTCCCAGTCACGACGAAGAAGACCGTGGCTGAGAAAG	Oc_3584_aR	GTTTCTTGCTTGAGGACCTTGAAGATGT	(AAG)5	(AAG)5	AAG	178	178	178-178	Monomorphic													NHs87_lrc10359_aL	CAGTTTTCCCAGTCACGACATTGCGCTACTAGTCTCCACTTCG		yam_O_contig_3584_a	Oc_3584_aL	AAG	3	15	(AAG)	5	(AAG)5			Oc_3584_aL	(AAG)5			Oc_3584_aL	AAG				Oc_3584_a	Oc_3584_aL	178
Oc_2744_aL	CAGTTTTCCCAGTCACGACTCAAGTTCCAAACAACATTTGCAT	Oc_2744_aR	GTTTTATCTGATGATCAAAGGCACCTCC	(AAT)5	(AAT)5	AAT	157	167	157-167	Polymorphic													NHsA8_c10566_2_aL	CAGTTTTCCCAGTCACGACAAGGAAATGAAGGTGGTGGATATG		yam_O_contig_2744_a	Oc_2744_aL	AAT	3	15	(AAT)	5	(AAT)5			Oc_2744_aL	(AAT)5			Oc_2744_aL	AAT				Oc_2744_a	Oc_2744_aL	157
Oc_763_aL	CAGTTTTCCCAGTCACGACGGTTTGCCTTTGTTTGTTTGATTC	Oc_763_aR	GTTTCCCTCAAACACATGTAATGATGCTA	(TTA)5	(TTA)5	TTA	179	181	179-181	Polymorphic													NHsA8_c10588_2_aL	CAGTTTTCCCAGTCACGACGGCTAATGGTCATTGCTGCTTTAT		yam_O_contig_763_a	Oc_763_aL	TTA	3	15	(TTA)	5	(TTA)5			Oc_763_aL	(TTA)5			Oc_763_aL	TTA				Oc_763_a	Oc_763_aL	179
Oc_6728_aL	CAGTTTTCCCAGTCACGACGCACCTACTCCTTGTTAGACATCCA	Oc_6728_aR	GTTTAAACTGAACCAAACGGAACCAAT	(TAA)5	(TAA)5	TAA	141	141	141-141	Monomorphic													NHsA8_c12137_4_aL	CAGTTTTCCCAGTCACGACACGTTACAAGAGAAGTGAGGACGC		yam_O_contig_6728_a	Oc_6728_aL	TAA	3	15	(TAA)	5	(TAA)5			Oc_6728_aL	(TAA)5			Oc_6728_aL	TAA				Oc_6728_a	Oc_6728_aL	141
Oc_1658_aL	CAGTTTTCCCAGTCACGACATACCCACCAAATCCATCAACCT	Oc_1658_aR	GTTTTTGTGAAGAAGAGGAGAGGGAGG	(TCC)5	(TCC)5	TCC	166	166	166-166	Monomorphic													NHsA8_c12375_2_aL	CAGTTTTCCCAGTCACGACCTTCGCTGAAGCAAAACCCC		yam_O_contig_1658_a	Oc_1658_aL	TCC	3	15	(TCC)	5	(TCC)5			Oc_1658_aL	(TCC)5			Oc_1658_aL	TCC				Oc_1658_a	Oc_1658_aL	166
Oc_239_aL	CAGTTTTCCCAGTCACGACCCAAGGAGAAATCCAGGAAAGG	Oc_239_aR	GTTTCTTGCGCTTCTTATCGTCCTGT	(GAG)5	(GAG)5	GAG	147	147	147-147	Monomorphic													NHsA8_c14455_2_aL	CAGTTTTCCCAGTCACGACTGCATTGTAGTCATTAAACTCCTGC		yam_O_contig_239_a	Oc_239_aL	GAG	3	15	(GAG)	5	(GAG)5			Oc_239_aL	(GAG)5			Oc_239_aL	GAG				Oc_239_a	Oc_239_aL	147
Oc_4167_aL	CAGTTTTCCCAGTCACGACGAGATACGCCGGTTTCTTCTCTC	Oc_4167_aR	GTTTAAGCGAGTTATGGATGATCCTGTC	(GGC)5	(GGC)5	GGC	148	148	148-148	Monomorphic													NHsA8_c4355_5_aL	CAGTTTTCCCAGTCACGACATCTTTTGGCCCATCAATACTCTG		yam_O_contig_4167_a	Oc_4167_aL	GGC	3	15	(GGC)	5	(GGC)5			Oc_4167_aL	(GGC)5			Oc_4167_aL	GGC				Oc_4167_a	Oc_4167_aL	148
Oc_2278_aL	CAGTTTTCCCAGTCACGACAGCATCTCGAGCAGCAAAAGATAG	Oc_2278_aR	GTTTCCTTCAGCTTCATCCTCATCCTTA	(GAT)5	(GAT)5	GAT	71	75	71-75	Polymorphic													NHsA8_c6374_5_aL	CAGTTTTCCCAGTCACGACGTGTGCCGTCTGTCTCACATTAAC		yam_O_contig_2278_a	Oc_2278_aL	GAT	3	15	(GAT)	5	(GAT)5			Oc_2278_aL	(GAT)5			Oc_2278_aL	GAT				Oc_2278_a	Oc_2278_aL	71
OsB9_c12991_3_aL	CAGTTTTCCCAGTCACGACTGCACTCTTCCTTAATCCCACAAC	OsB9_c12991_3_aR	GTTTCAACCATTTGAGGTTTGTTTTTCC	(GCC)5	(GCC)5	GCC	175	178	175-178	Polymorphic													NHsA8_c6591_5_aL	CAGTTTTCCCAGTCACGACGAGTCTGAGTGCCACGATTCAGTA		yam_O_singleton_B310-33_9_c12991_3_a	OsB9_c12991_3_aL	GCC	3	15	(GCC)	5	(GCC)5			OsB9_c12991_3_aL	(GCC)5			OsB9_c12991_3_aL	GCC				OsB9_c12991_3_a	OsB9_c12991_3_aL	175
Oc_1666_bL	CAGTTTTCCCAGTCACGACGAGAGGCATGGATGTAGCTTTGAT	Oc_1666_bR	GTTTACACAAACCCACCCAATCAATC	(ATG)5	(ATG)5	ATG	182	182	182-182	Monomorphic													NHsA8_c8963_4_aL	CAGTTTTCCCAGTCACGACTTGGATGATGTTCGATTAATTCCC		yam_O_contig_1666_b	Oc_1666_bL	ATG	3	15	(ATG)	5	(ATG)5			Oc_1666_bL	(ATG)5			Oc_1666_bL	ATG				Oc_1666_b	Oc_1666_bL	182
Oc_425_aL	CAGTTTTCCCAGTCACGACTTACCACCTCTGAGCCGATTAAGT	Oc_425_aR	GTTTTCTCTTCCTCAACAACACCATCAA	(ATG)5	(ATG)5	ATG	175	200	175-200	Polymorphic													NHsA8_c9612_2_aL	CAGTTTTCCCAGTCACGACTGGTTAGCGAACAAAAGGAATTTG		yam_O_contig_425_a	Oc_425_aL	ATG	3	15	(ATG)	5	(ATG)5			Oc_425_aL	(ATG)5			Oc_425_aL	ATG				Oc_425_a	Oc_425_aL	175
Oc_852_bL	CAGTTTTCCCAGTCACGACTCTAAATGATGGCAAACTTGGTGA	Oc_852_bR	GTTTAGTTTCAACAGCTAATTGCGGAAG	(GCA)5	(GCA)5	GCA	163	163	163-163	Monomorphic													NHsB9_c10576_2_aL	CAGTTTTCCCAGTCACGACTGCATAAGCAATAACTCAAAGCCA		yam_O_contig_852_b	Oc_852_bL	GCA	3	15	(GCA)	5	(GCA)5			Oc_852_bL	(GCA)5			Oc_852_bL	GCA				Oc_852_b	Oc_852_bL	163
Oc_5750_aL	CAGTTTTCCCAGTCACGACTGGTGACGATATCACTCAAAAGCA	Oc_5750_aR	GTTTTATCCTCCTCCACAGCAGGCTTAT	(CTG)5	(CTG)5	CTG	0	0	-	Didn't Work													Oc_1854cL	CAGTTTTCCCAGTCACGACCAAGGAAGAAGGAAAGCTGAGAAA		yam_O_contig_5750_a	Oc_5750_aL	CTG	3	15	(CTG)	5	(CTG)5			Oc_5750_aL	(CTG)5			Oc_5750_aL	CTG				Oc_5750_a	Oc_5750_aL
Oc_2609_bL	CAGTTTTCCCAGTCACGACCAGCAGCAGCAATGGAGATTAGTA	Oc_2609_bR	GTTTATCCCAGTTGTTCTGTGATGGATT	(TGG)5	(TGG)5	TGG	181	181	181-181	Monomorphic													Oc_5238_aL	CAGTTTTCCCAGTCACGACTTATTGTCAACAAGGTGGGTGCTA		yam_O_contig_2609_b	Oc_2609_bL	TGG	3	15	(TGG)	5	(TGG)5			Oc_2609_bL	(TGG)5			Oc_2609_bL	TGG				Oc_2609_b	Oc_2609_bL	181
Oc_2782_aL	CAGTTTTCCCAGTCACGACGAAGAGCATGTGAGGGTGATCTTT	Oc_2782_aR	GTTTACCACCACCCCTTTTATTCACTCT	(GCT)5	(GCT)5	GCT	176	176	176-176	Monomorphic													Oc_406cL	CAGTTTTCCCAGTCACGACACAGACTGACTAAACAGTTCCATTAGCA		yam_O_contig_2782_a	Oc_2782_aL	GCT	3	15	(GCT)	5	(GCT)5			Oc_2782_aL	(GCT)5			Oc_2782_aL	GCT				Oc_2782_a	Oc_2782_aL	176
Oc_437_aL	CAGTTTTCCCAGTCACGACCCCCCTGGTTCCATTTATTGTTAT	Oc_437_aR	GTTTCGGAAAATTCATCTGAGAAGGAAA	(TGC)5	(TGC)5	TGC	157	163	157-163	Polymorphic													Oc_3527_bL	CAGTTTTCCCAGTCACGACTGATGGGATACCTTCTTTCATGCT		yam_O_contig_437_a	Oc_437_aL	TGC	3	15	(TGC)	5	(TGC)5			Oc_437_aL	(TGC)5			Oc_437_aL	TGC				Oc_437_a	Oc_437_aL	157
Oc_1454_aL	CAGTTTTCCCAGTCACGACTTTAGACTCCTCAGAAATGAACAACATC	Oc_1454_aR	GTTTATTTCTATGACGGTATCGGGGAGT	(CAA)5	(CAA)5	CAA	172	172	172-172	Monomorphic													Oc_627_aL	CAGTTTTCCCAGTCACGACGGAAAAGATTCTGGTGATGAGTCC		yam_O_contig_1454_a	Oc_1454_aL	CAA	3	15	(CAA)	5	(CAA)5			Oc_1454_aL	(CAA)5			Oc_1454_aL	CAA				Oc_1454_a	Oc_1454_aL	172
Oc_4414_aL	CAGTTTTCCCAGTCACGACTGTTGTGCTTAGAGCTTCTCATCTCTT	Oc_4414_aR	GTTTCCACCACTCCCTGTACACTGATTAT	(TTA)5	(TTA)5	TTA	134	134	134-134	Monomorphic													Oc_4539_aL	CAGTTTTCCCAGTCACGACTGTGCCTGCTTTTCTGTAGATTTT		yam_O_contig_4414_a	Oc_4414_aL	TTA	3	15	(TTA)	5	(TTA)5			Oc_4414_aL	(TTA)5			Oc_4414_aL	TTA				Oc_4414_a	Oc_4414_aL	134
Oc_666_aL	CAGTTTTCCCAGTCACGACGATCACGTGCAGAGGTGTACCTAA	Oc_666_aR	GTTTAACACCAACCACTTGACCTATACACA	(TTA)5	(TTA)5	TTA	186	186	186-186	Monomorphic													Oc_2083_aL	CAGTTTTCCCAGTCACGACTATTGCTTCGCCTCTGTACAATCA		yam_O_contig_666_a	Oc_666_aL	TTA	3	15	(TTA)	5	(TTA)5			Oc_666_aL	(TTA)5			Oc_666_aL	TTA				Oc_666_a	Oc_666_aL	186
Oc_4563_aL	CAGTTTTCCCAGTCACGACCAGGGAGAGTAGATAGAAGCAGCG	Oc_4563_aR	GTTTCATCATAGCCGACTTTGAGAACAA	(CTT)5	(CTT)5	CTT	124	124	124-124	Monomorphic													Oc_2386_aL	CAGTTTTCCCAGTCACGACGCTGAGAATTGAAGCTCGGAGTAG		yam_O_contig_4563_a	Oc_4563_aL	CTT	3	15	(CTT)	5	(CTT)5			Oc_4563_aL	(CTT)5			Oc_4563_aL	CTT				Oc_4563_a	Oc_4563_aL	124
Os87_c11863_aL	CAGTTTTCCCAGTCACGACCTGATGCATCTCCAACCACAGTT	Os87_c11863_aR	GTTTCAGCCAGTAAAGCAGGTGTACTCA	(TCT)5	(TCT)5	TCT	172	172	172-172	Monomorphic													OsA8_c12327_3_aL	CAGTTTTCCCAGTCACGACAGAACTTGGTTTTCCTTTGCGTC		yam_O_singleton_87-01091-33_1_c11863_a	Os87_c11863_aL	TCT	3	15	(TCT)	5	(TCT)5			Os87_c11863_aL	(TCT)5			Os87_c11863_aL	TCT				Os87_c11863_a	Os87_c11863_aL	172
Oc_3982_aL	CAGTTTTCCCAGTCACGACAGGAGGATGAAGATGATGAAGGTG	Oc_3982_aR	GTTTCATGGACTTGCTTCACAGTCTTGT	(GAA)5	(GAA)5	GAA	130	133	130-133	Polymorphic													Oc_2985_aL	CAGTTTTCCCAGTCACGACCCAACACCAATCCTCTAAAACAGG		yam_O_contig_3982_a	Oc_3982_aL	GAA	3	15	(GAA)	5	(GAA)5			Oc_3982_aL	(GAA)5			Oc_3982_aL	GAA				Oc_3982_a	Oc_3982_aL	130
Oc_5193_aL	CAGTTTTCCCAGTCACGACTATCAAGGTGGAAACCCTGGCTAT	Oc_5193_aR	GTTTAGAAAAACCAGGTCCACTTCCCT	(GGT)5	(GGT)5	GGT	89	204	89-204	Polymorphic													Oc_3971_aL	CAGTTTTCCCAGTCACGACCTAATATGGAGCCTCTCTTGCCTC		yam_O_contig_5193_a	Oc_5193_aL	GGT	3	15	(GGT)	5	(GGT)5			Oc_5193_aL	(GGT)5			Oc_5193_aL	GGT				Oc_5193_a	Oc_5193_aL	89
Oc_1561_aL	CAGTTTTCCCAGTCACGACTAAGCCATCATGGGAATGGTACAC	Oc_1561_aR	GTTTAAAATCCATGGCGTCCGAAG	(GTG)5	(GTG)5	GTG	235	235	235-235	Monomorphic													OsA8_c1060_15_aL	CAGTTTTCCCAGTCACGACATTCAATCAGTAGAGCTGTTGGGC		yam_O_contig_1561_a	Oc_1561_aL	GTG	3	15	(GTG)	5	(GTG)5			Oc_1561_aL	(GTG)5			Oc_1561_aL	GTG				Oc_1561_a	Oc_1561_aL	235
Os87_c4894_aL	CAGTTTTCCCAGTCACGACTAACTAGTAAGAGTCGCCCCTCCC	Os87_c4894_aR	GTTTCAAAAAGAAATTTGAGAGATGGAACG	(AGC)5	(AGC)5	AGC	118	118	118-118	Monomorphic													Oc_1364_aL	CAGTTTTCCCAGTCACGACGTTGGAACCTTGGATCTCGATG		yam_O_singleton_87-01091-33_1_c4894_a	Os87_c4894_aL	AGC	3	15	(AGC)	5	(AGC)5			Os87_c4894_aL	(AGC)5			Os87_c4894_aL	AGC				Os87_c4894_a	Os87_c4894_aL	118
Oc_6794_aL	CAGTTTTCCCAGTCACGACAACGACAAATTCCAACCTCTTGTC	Oc_6794_aR	GTTTTTCAATCGTTTCTATTCTGAAATACTGC	(ACT)5	(ACT)5	ACT	141	141	141-141	Monomorphic													Oc_5075_aL	CAGTTTTCCCAGTCACGACATGGTTAAGCACACACCACCTTCT		yam_O_contig_6794_a	Oc_6794_aL	ACT	3	15	(ACT)	5	(ACT)5			Oc_6794_aL	(ACT)5			Oc_6794_aL	ACT				Oc_6794_a	Oc_6794_aL	141
Oc_5781_aL	CAGTTTTCCCAGTCACGACAGTCCCCCTCAAAAATACACATGA	Oc_5781_aR	GTTTAAGTAGGTCTTGTGCCTACCGTGA	(ATT)5	(ATT)5	ATT	118	126	118-126	Polymorphic													Oc_2919_aL	CAGTTTTCCCAGTCACGACACCGTCAACGAAGCTCAGTCC		yam_O_contig_5781_a	Oc_5781_aL	ATT	3	15	(ATT)	5	(ATT)5			Oc_5781_aL	(ATT)5			Oc_5781_aL	ATT				Oc_5781_a	Oc_5781_aL	118
Os87_c5505_aL	CAGTTTTCCCAGTCACGACCGTTTCCCCACGAACACTAGAC	Os87_c5505_aR	GTTTGAGACAAGCCGAAGCCTGAC	(CGG)5	(CGG)5	CGG	148	151	148-151	Polymorphic													Oc_1547_aL	CAGTTTTCCCAGTCACGACAAGAATCACAAGCATTGGCATGTA		yam_O_singleton_87-01091-33_1_c5505_a	Os87_c5505_aL	CGG	3	15	(CGG)	5	(CGG)5			Os87_c5505_aL	(CGG)5			Os87_c5505_aL	CGG				Os87_c5505_a	Os87_c5505_aL	148
Oc_2111_aL	CAGTTTTCCCAGTCACGACTTTTACAGCAGCAACAGCAACAG	Oc_2111_aR	GTTTCTGTTGTACTTGTGAAACTTGCCG	(CAA)5	(CAA)5	CAA	147	147	147-147	Monomorphic													Oc_248_aL	CAGTTTTCCCAGTCACGACTGGCAGCAACTTCTTTATTTATGGA		yam_O_contig_2111_a	Oc_2111_aL	CAA	3	15	(CAA)	5	(CAA)5			Oc_2111_aL	(CAA)5			Oc_2111_aL	CAA				Oc_2111_a	Oc_2111_aL	147
OsA8_c3639_17_aL	CAGTTTTCCCAGTCACGACAGTTGCAAATAAGGCTCTTCACCA	OsA8_c3639_17_aR	GTTTTAGAACATCATAGAGCCAAACCGC	(GTT)5	(GTT)5	GTT	104	107	104-107	Polymorphic													Oc_4467_aL	CAGTTTTCCCAGTCACGACCCTGCATAAGACATAAGCTCTCAACA		yam_O_singleton_A328-33_8_c3639_17_a	OsA8_c3639_17_aL	GTT	3	15	(GTT)	5	(GTT)5			OsA8_c3639_17_aL	(GTT)5			OsA8_c3639_17_aL	GTT				OsA8_c3639_17_a	OsA8_c3639_17_aL	104
Oc_6771_aL	CAGTTTTCCCAGTCACGACAAAAGGCCGATAACGAACAAAAAT	Oc_6771_aR	GTTTCTTTTGCCAAGGATTTTAATGTGC	(TGT)5	(TGT)5	TGT	134	149	134-149	Polymorphic													Oc_587_aL	CAGTTTTCCCAGTCACGACATCTGAAGCCCTCCTGCTTACTTC		yam_O_contig_6771_a	Oc_6771_aL	TGT	3	15	(TGT)	5	(TGT)5			Oc_6771_aL	(TGT)5			Oc_6771_aL	TGT				Oc_6771_a	Oc_6771_aL	134
Oc_1370_aL	CAGTTTTCCCAGTCACGACAGGTGACGAAGATTGCATTGTTTT	Oc_1370_aR	GTTTGGGCCAAATTAAATTGAGAACAGA	(ATC)5	(ATC)5	ATC	184	184	184-184	Monomorphic													Os87_c4306_aL	CAGTTTTCCCAGTCACGACCCAATGCACCACCACCTCTACT		yam_O_contig_1370_a	Oc_1370_aL	ATC	3	15	(ATC)	5	(ATC)5			Oc_1370_aL	(ATC)5			Oc_1370_aL	ATC				Oc_1370_a	Oc_1370_aL	184
Oc_5994_aL	CAGTTTTCCCAGTCACGACTCACAATGCTTCTGATGAAGGGTA	Oc_5994_aR	GTTTTTAAACACCTGAACGCTGCAACTA	(AT)7	(AT)7	AT	113	113	113-113	Monomorphic													Oc_6102_aL	CAGTTTTCCCAGTCACGACGGCCAGTAATGGTTCTTGTTCATC		yam_O_contig_5994_a	Oc_5994_aL	AT	2	14	(AT)	7	(AT)7			Oc_5994_aL	(AT)7			Oc_5994_aL	AT				Oc_5994_a	Oc_5994_aL	113
Os87_c8512_aL	CAGTTTTCCCAGTCACGACACTTCAGTGGGATCAGAGAGGCTA	Os87_c8512_aR	GTTTATGCACAACTCACCCCATTTTACT	(AG)7	(AG)7	AG	0	0	-	Didn't Work													Os87_lrc10849_aL	CAGTTTTCCCAGTCACGACTACCTGATGGGCGTCTAGGATATG		yam_O_singleton_87-01091-33_1_c8512_a	Os87_c8512_aL	AG	2	14	(AG)	7	(AG)7			Os87_c8512_aL	(AG)7			Os87_c8512_aL	AG				Os87_c8512_a	Os87_c8512_aL
OsA8_c8444_5_aL	CAGTTTTCCCAGTCACGACTCAGGAAATCTTTAATTACATGACCAGA	OsA8_c8444_5_aR	GTTTTTGGAATGTCTCCTGTGATTGAGT	(AT)7	(AT)7	AT	109	111	109-111	Polymorphic													Oc_234_aL	CAGTTTTCCCAGTCACGACTTGCTCGCTGAGAAGTCGAATAAT		yam_O_singleton_A328-33_8_c8444_5_a	OsA8_c8444_5_aL	AT	2	14	(AT)	7	(AT)7			OsA8_c8444_5_aL	(AT)7			OsA8_c8444_5_aL	AT				OsA8_c8444_5_a	OsA8_c8444_5_aL	109
Os87_c8656_aL	CAGTTTTCCCAGTCACGACGGTGCTTTCATGATCTTGCTTATC	Os87_c8656_aR	GTTTCCACCTTTAGTTATAAGACTCTCACACA	(AT)7	(AT)7	AT	127	137	127-137	Polymorphic													Os87_c878_aL	CAGTTTTCCCAGTCACGACTGCACCATGCTCAAGAAGTAACTC		yam_O_singleton_87-01091-33_1_c8656_a	Os87_c8656_aL	AT	2	14	(AT)	7	(AT)7			Os87_c8656_aL	(AT)7			Os87_c8656_aL	AT				Os87_c8656_a	Os87_c8656_aL	127
Oc_3654_bL	CAGTTTTCCCAGTCACGACTAAACTTGAGCAAGGAAGGCATTA	Oc_3654_bR	GTTTTTTTTCACACATATAACCTTTGAGGAA	(GT)7	(GT)7	GT	176	182	176-182	Polymorphic													Oc_4934_aL	CAGTTTTCCCAGTCACGACCTAATCGCGACTCCTCCTCGT		yam_O_contig_3654_b	Oc_3654_bL	GT	2	14	(GT)	7	(GT)7			Oc_3654_bL	(GT)7			Oc_3654_bL	GT				Oc_3654_b	Oc_3654_bL	176
Oc_6461_aL	CAGTTTTCCCAGTCACGACCAAGTTCACCAACAAAGCTTACCC	Oc_6461_aR	GTTTGCAGTAGGACATCATAACAACACACA	(TA)7	(TA)7	TA	174	176	174-176	Polymorphic													Os87_c4306_aL	CAGTTTTCCCAGTCACGACCCAATGCACCACCACCTCTACT		yam_O_contig_6461_a	Oc_6461_aL	TA	2	14	(TA)	7	(TA)7			Oc_6461_aL	(TA)7			Oc_6461_aL	TA				Oc_6461_a	Oc_6461_aL	174
Oc_715_aL	CAGTTTTCCCAGTCACGACCTGATGCCCTCACTTAGTCTGGTT	Oc_715_aR	GTTTACTTGATTGATGAAAGAGAACGCC	(CT)7	(CT)7	CT	126	130	126-130	Polymorphic													NHs87_c5029_aR	GTTTGAAGGGAATGAAGACAGTGAGGAA		yam_O_contig_715_a	Oc_715_aL	CT	2	14	(CT)	7	(CT)7			Oc_715_aL	(CT)7			Oc_715_aL	CT				Oc_715_a	Oc_715_aL	126
Os87_c8512_aL	CAGTTTTCCCAGTCACGACACTTCAGTGGGATCAGAGAGGCTA	Os87_c8512_aR	GTTTATGCACAACTCACCCCATTTTACT	(AG)7	(AG)7	AG	0	0	-	Didn't Work													NHsA8_c13489_2_aR	GTTTCTCCACCACCACCTACACCATC		yam_O_singleton_87-01091-33_1_c8512_a	Os87_c8512_aL	AG	2	14	(AG)	7	(AG)7			Os87_c8512_aL	(AG)7			Os87_c8512_aL	AG				Os87_c8512_a	Os87_c8512_aL
Oc_5127_aL	CAGTTTTCCCAGTCACGACCAACAGATATGATCCTGGTTGCTC	Oc_5127_aR	GTTTCTGGCATCAGCATTAACAGTTACC	(TA)7	(TA)7	TA	184	187	184-187	Polymorphic													NHc_127cR	GTTTCAAGTAGAATGAAGACCTCAAACATCA		yam_O_contig_5127_a	Oc_5127_aL	TA	2	14	(TA)	7	(TA)7			Oc_5127_aL	(TA)7			Oc_5127_aL	TA				Oc_5127_a	Oc_5127_aL	184
Oc_2617_bL	CAGTTTTCCCAGTCACGACATTGATCACAAGAAACCCAATGAA	Oc_2617_bR	GTTTACTGAATAAAGGACACCCATACCTC	(TA)7	(TA)7	TA	156	160	156-160	Polymorphic													NHc_131_bR	GTTTCAGTAATGCTAAACACAAGAAGGTAAGG		yam_O_contig_2617_b	Oc_2617_bL	TA	2	14	(TA)	7	(TA)7			Oc_2617_bL	(TA)7			Oc_2617_bL	TA				Oc_2617_b	Oc_2617_bL	156
Os87_c10382_aL	CAGTTTTCCCAGTCACGACGAGAGAAGAGGGATCGAGGTGTTC	Os87_c10382_aR	GTTTGATGGTCGACGAGAGAGCTAGAGA	(TC)7	(TC)7	TC	103	123	103-123	Polymorphic													NHc_3405_aR	GTTTCAGTAATTTCAATTGAGCAACACTTACT		yam_O_singleton_87-01091-33_1_c10382_a	Os87_c10382_aL	TC	2	14	(TC)	7	(TC)7			Os87_c10382_aL	(TC)7			Os87_c10382_aL	TC				Os87_c10382_a	Os87_c10382_aL	103
Os87_c1577_aL	CAGTTTTCCCAGTCACGACTAGACACCATTAAAAACCAGTGCC	Os87_c1577_aR	GTTTAAAAATTTCCGTGTTTGAAGTGATT	(TA)7	(TA)7	TA	156	161	156-161	Polymorphic													NHc_5174_aR	GTTTCAGACATCAAACAATCAGCAACAA		yam_O_singleton_87-01091-33_1_c1577_a	Os87_c1577_aL	TA	2	14	(TA)	7	(TA)7			Os87_c1577_aL	(TA)7			Os87_c1577_aL	TA				Os87_c1577_a	Os87_c1577_aL	156
OsB9_c15460_2_aL	CAGTTTTCCCAGTCACGACAATTGAAGCCAACCAACCTAAACC	OsB9_c15460_2_aR	GTTTGAGGGTTTTCTTCAACGTTGTGTT	(CA)7	(CA)7	CA	103	115	103-115	Polymorphic													NHc_5324_aR	GTTTTATACAGTTTCAGCCCCTTCTTGC		yam_O_singleton_B310-33_9_c15460_2_a	OsB9_c15460_2_aL	CA	2	14	(CA)	7	(CA)7			OsB9_c15460_2_aL	(CA)7			OsB9_c15460_2_aL	CA				OsB9_c15460_2_a	OsB9_c15460_2_aL	103
Oc_870_aL	CAGTTTTCCCAGTCACGACTAACTTGGTACCCTTTTGCATGGT	Oc_870_aR	GTTTGAAAAACCTCAAACATGAAACGCT	(AT)7	(AT)7	AT	0	0	-	Didn't Work													NHc_5914_aR	GTTTAATTCAGAAGGACTTTTTGGTGAAA		yam_O_contig_870_a	Oc_870_aL	AT	2	14	(AT)	7	(AT)7			Oc_870_aL	(AT)7			Oc_870_aL	AT				Oc_870_a	Oc_870_aL
Oc_47_aL	CAGTTTTCCCAGTCACGACGACTTCCTTGCTGCCTTCGTC	Oc_47_aR	GTTTGCTTGCAAACCCTAACCCTAATTC	(GA)7	(GA)7	GA	155	155	155-155	Monomorphic													NHc_7134_aR	GTTTTGCCATATAAGATGCTTGAAACTCA		yam_O_contig_47_a	Oc_47_aL	GA	2	14	(GA)	7	(GA)7			Oc_47_aL	(GA)7			Oc_47_aL	GA				Oc_47_a	Oc_47_aL	155
Oc_6012_aL	CAGTTTTCCCAGTCACGACCATGAATCAATGCACCCCTGTAT	Oc_6012_aR	GTTTCCATATGCTCCAGGGATACCTCTT	(AT)7	(AT)7	AT	180	180	180-180	Monomorphic													NHs87_c5013_aR	GTTTTCCAATTTTCAATGGCAATAATCA		yam_O_contig_6012_a	Oc_6012_aL	AT	2	14	(AT)	7	(AT)7			Oc_6012_aL	(AT)7			Oc_6012_aL	AT				Oc_6012_a	Oc_6012_aL	180
Oc_6282_aL	CAGTTTTCCCAGTCACGACTGGTCCTCATATTTTGCTCTACTGC	Oc_6282_aR	GTTTTTCAAGACAAACAAAAGGAGGTGG	(AG)7	(AG)7	AG	0	0	-	Didn't Work													NHs87_lrc10359_aR	GTTTATTAAGCAAGATGACAGCCTTGGA		yam_O_contig_6282_a	Oc_6282_aL	AG	2	14	(AG)	7	(AG)7			Oc_6282_aL	(AG)7			Oc_6282_aL	AG				Oc_6282_a	Oc_6282_aL
Oc_2360_aL	CAGTTTTCCCAGTCACGACTTTATTGGGTTGGTCCTTTGATTG	Oc_2360_aR	GTTTATCCACGTTAACATAACCACCACC	(GA)7	(GA)7	GA	158	168	158-168	Polymorphic													NHsA8_c10566_2_aR	GTTTGACCAAACCTATGTATTCACTTACTTGG		yam_O_contig_2360_a	Oc_2360_aL	GA	2	14	(GA)	7	(GA)7			Oc_2360_aL	(GA)7			Oc_2360_aL	GA				Oc_2360_a	Oc_2360_aL	158
Oc_913_aL	CAGTTTTCCCAGTCACGACAAATTACCAAGAAAACAAAGAAAACAAA	Oc_913_aR	GTTTGCTGATGCTACTACTGCTCCAAAC	(AG)7	(AG)7	AG	141	150	141-150	Polymorphic													NHsA8_c10588_2_aR	GTTTATGGAAAGGAGATTCCTTGGTTGT		yam_O_contig_913_a	Oc_913_aL	AG	2	14	(AG)	7	(AG)7			Oc_913_aL	(AG)7			Oc_913_aL	AG				Oc_913_a	Oc_913_aL	141
Oc_320_bL	CAGTTTTCCCAGTCACGACTTGTGGTTGCTTACAAAAATTCCC	Oc_320_bR	GTTTCCAATAGAACTCGCACCAAAACTT	(TA)7	(TA)7	TA	149	188	149-188	Polymorphic													NHsA8_c12137_4_aR	GTTTTTCTTCAACATTATCATTGGCAGC		yam_O_contig_320_b	Oc_320_bL	TA	2	14	(TA)	7	(TA)7			Oc_320_bL	(TA)7			Oc_320_bL	TA				Oc_320_b	Oc_320_bL	149
Oc_6474_aL	CAGTTTTCCCAGTCACGACGAATTCCCGGGACTCTGTTTTACT	Oc_6474_aR	GTTTAGACAAAAACCCTAAACCCTACGC	(TC)7	(TC)7	TC	0	0	-	Didn't Work													NHsA8_c12375_2_aR	GTTTTCTCCATCCTTCTATACATCCCCC		yam_O_contig_6474_a	Oc_6474_aL	TC	2	14	(TC)	7	(TC)7			Oc_6474_aL	(TC)7			Oc_6474_aL	TC				Oc_6474_a	Oc_6474_aL
Oc_6254_dL	CAGTTTTCCCAGTCACGACACTGGCTGCTGCTAAGAAGAAAGA	Oc_6254_dR	GTTTCATCTAAAAGGGCAGCAAAAGTGT	(TA)7	(TA)7	TA	0	0	-	Didn't Work													NHsA8_c14455_2_aR	GTTTAGCTGGATGAACAACACCAATCTA		yam_O_contig_6254_d	Oc_6254_dL	TA	2	14	(TA)	7	(TA)7			Oc_6254_dL	(TA)7			Oc_6254_dL	TA				Oc_6254_d	Oc_6254_dL
Oc_6014_aL	CAGTTTTCCCAGTCACGACTCGGTGAAATCATAAACATGTCCTT	Oc_6014_aR	GTTTTGTCGTTTAGCCCGATTTAGAAGA	(TA)7	(TA)7	TA	182	182	182-182	Monomorphic													NHsA8_c4355_5_aR	GTTTTAATTGATGATAAGTGCCGCCTTT		yam_O_contig_6014_a	Oc_6014_aL	TA	2	14	(TA)	7	(TA)7			Oc_6014_aL	(TA)7			Oc_6014_aL	TA				Oc_6014_a	Oc_6014_aL	182
Oc_1949_aL	CAGTTTTCCCAGTCACGACGGAGCCTACCACACAGTCTTTGAT	Oc_1949_aR	GTTTCACACCACGAGTAATGGTACACAA	(AT)7	(AT)7	AT	180	182	180-182	Polymorphic													NHsA8_c6374_5_aR	GTTTTCCAAACCAAAATGAACAATACAAAA		yam_O_contig_1949_a	Oc_1949_aL	AT	2	14	(AT)	7	(AT)7			Oc_1949_aL	(AT)7			Oc_1949_aL	AT				Oc_1949_a	Oc_1949_aL	180
Oc_1949_aL	CAGTTTTCCCAGTCACGACGGAGCCTACCACACAGTCTTTGAT	Oc_1949_aR	GTTTCACACCACGAGTAATGGTACACAA	(AT)7	(AT)7	AT	180	182	180-182	Polymorphic													NHsA8_c6591_5_aR	GTTTAAGACTGTATTCTTTTGTCAACCCAAA		yam_O_contig_1949_a	Oc_1949_aL	AT	2	14	(AT)	7	(AT)7			Oc_1949_aL	(AT)7			Oc_1949_aL	AT				Oc_1949_a	Oc_1949_aL	180
Oc_3419_aL	CAGTTTTCCCAGTCACGACTGTTAATCAGTAAATCAACCATCCTTCA	Oc_3419_aR	GTTTAGACTGTGCATGGTCAAGGGTAAT	(AT)7	(AT)7	AT	145	148	145-148	Polymorphic													NHsA8_c8963_4_aR	GTTTAACTAACTATTCACATGGCACCCG		yam_O_contig_3419_a	Oc_3419_aL	AT	2	14	(AT)	7	(AT)7			Oc_3419_aL	(AT)7			Oc_3419_aL	AT				Oc_3419_a	Oc_3419_aL	145
Oc_808_aL	CAGTTTTCCCAGTCACGACCCTTCTTGTGGACCTGTTGTTGTA	Oc_808_aR	GTTTTCCCCTATACATTCCTTTAAGTTCAGA	(TA)7	(TA)7	TA	167	177	167-177	Polymorphic													NHsA8_c9612_2_aR	GTTTGCACTCACGGGTTCTTATTAATGC		yam_O_contig_808_a	Oc_808_aL	TA	2	14	(TA)	7	(TA)7			Oc_808_aL	(TA)7			Oc_808_aL	TA				Oc_808_a	Oc_808_aL	167
OsA8_c14521_2_aL	CAGTTTTCCCAGTCACGACAGGGCTTACTTTTTGGTTCTGATG	OsA8_c14521_2_aR	GTTTGCATCAAGAACTTGTTTCAGTGGA	(TA)7	(TA)7	TA	142	145	142-145	Polymorphic													NHsB9_c10576_2_aR	GTTTTGGAAACCATTAGCACATAATTCAAA		yam_O_singleton_A328-33_8_c14521_2_a	OsA8_c14521_2_aL	TA	2	14	(TA)	7	(TA)7			OsA8_c14521_2_aL	(TA)7			OsA8_c14521_2_aL	TA				OsA8_c14521_2_a	OsA8_c14521_2_aL	142
Oc_125_aL	CAGTTTTCCCAGTCACGACCGCCTTTTAGCTTCTTCTCTAGCC	Oc_125_aR	GTTTAAGTCTTATAGCGGGAATCAAGGC	(TC)7	(TC)7	TC	0	0	-	Didn't Work													Oc_1854cR	GTTTAAAGCAACACACAACAAGGTCGT		yam_O_contig_125_a	Oc_125_aL	TC	2	14	(TC)	7	(TC)7			Oc_125_aL	(TC)7			Oc_125_aL	TC				Oc_125_a	Oc_125_aL
Oc_468_aL	CAGTTTTCCCAGTCACGACTATTTCCTGGAGGAGAGGTAGGGT	Oc_468_aR	GTTTCCAGATCTAGCATCTCCATAAGGG	(AG)7	(AG)7	AG	0	0	-	Didn't Work													Oc_5238_aR	GTTTTCATTTCATTTCATTTCAAAGGGG		yam_O_contig_468_a	Oc_468_aL	AG	2	14	(AG)	7	(AG)7			Oc_468_aL	(AG)7			Oc_468_aL	AG				Oc_468_a	Oc_468_aL
Oc_5182_aL	CAGTTTTCCCAGTCACGACTACAGGGCAACTGAGTTCATTTCA	Oc_5182_aR	GTTTAAAAGATTACAAACCGGCAACAGA	(GT)7	(GT)7	GT	128	136	128-136	Polymorphic													Oc_406cR	GTTTGTGCTGTGCACAAGCTGAGAAG		yam_O_contig_5182_a	Oc_5182_aL	GT	2	14	(GT)	7	(GT)7			Oc_5182_aL	(GT)7			Oc_5182_aL	GT				Oc_5182_a	Oc_5182_aL	128
Oc_2491_aL	CAGTTTTCCCAGTCACGACAACCCACTTAGGAAATGCAATCAA	Oc_2491_aR	GTTTGGGACATCAGACAACACATCACAC	(TG)7	(TG)7	TG	160	179	160-179	Polymorphic													Oc_3527_bR	GTTTAAGCCATCACATTCACTGCAAGTA		yam_O_contig_2491_a	Oc_2491_aL	TG	2	14	(TG)	7	(TG)7			Oc_2491_aL	(TG)7			Oc_2491_aL	TG				Oc_2491_a	Oc_2491_aL	160
Oc_6297_aL	CAGTTTTCCCAGTCACGACGATGGCAGAAAGTAAGGATTGGTG	Oc_6297_aR	GTTTGCCTGAGAAGAACGGACTGAATAA	(TA)7	(TA)7	TA	180	180	180-180	Monomorphic													Oc_627_aR	GTTTTCTTTGTTGTGCATTGTCTTTTGTC		yam_O_contig_6297_a	Oc_6297_aL	TA	2	14	(TA)	7	(TA)7			Oc_6297_aL	(TA)7			Oc_6297_aL	TA				Oc_6297_a	Oc_6297_aL	180
Oc_2445_aL	CAGTTTTCCCAGTCACGACACCATCCCTTCAAATTCATCCTTT	Oc_2445_aR	GTTTAAACACACAGAGAGGGAGCAAGAA	(CT)7	(CT)7	CT	113	115	113-115	Polymorphic													Oc_4539_aR	GTTTGGAGATGGTTTGAGAGACCATTATT		yam_O_contig_2445_a	Oc_2445_aL	CT	2	14	(CT)	7	(CT)7			Oc_2445_aL	(CT)7			Oc_2445_aL	CT				Oc_2445_a	Oc_2445_aL	113
Oc_5427_aL	CAGTTTTCCCAGTCACGACGAAGGAAATGGCCTCTCTTGTTTT	Oc_5427_aR	GTTTCAAAATCTGCAAACTTAAATCGCC	(GT)7	(GT)7	GT	156	163	156-163	Polymorphic													Oc_2083_aR	GTTTGGAGCACTGGTGGAGAGATTAGTG		yam_O_contig_5427_a	Oc_5427_aL	GT	2	14	(GT)	7	(GT)7			Oc_5427_aL	(GT)7			Oc_5427_aL	GT				Oc_5427_a	Oc_5427_aL	156
Oc_5707_aL	CAGTTTTCCCAGTCACGACCGGTTGCCTCTTTTACCAGAATAA	Oc_5707_aR	GTTTGGAATGAATCACATTGCACGTTT	(TA)7	(TA)7	TA	179	181	179-181	Polymorphic													Oc_2386_aR	GTTTCCTATCAATAATTCACCCATCCCA		yam_O_contig_5707_a	Oc_5707_aL	TA	2	14	(TA)	7	(TA)7			Oc_5707_aL	(TA)7			Oc_5707_aL	TA				Oc_5707_a	Oc_5707_aL	179
Oc_5806_aL	CAGTTTTCCCAGTCACGACTCCAAAAGTTACAGCGATAGGGTC	Oc_5806_aR	GTTTTTCAACAAAGAAACGCGTACAAAA	(GT)7	(GT)7	GT	165	167	165-167	Polymorphic													OsA8_c12327_3_aR	GTTTCAATACAAGAAGACTTTGGCGCTT		yam_O_contig_5806_a	Oc_5806_aL	GT	2	14	(GT)	7	(GT)7			Oc_5806_aL	(GT)7			Oc_5806_aL	GT				Oc_5806_a	Oc_5806_aL	165
Oc_2122_aL	CAGTTTTCCCAGTCACGACTAAAATCCTGGCTTGCAATTTTGT	Oc_2122_aR	GTTTAATATGTGTGAGCGTGCAGTCTTC	(TA)7	(TA)7	TA	180	188	180-188	Polymorphic													Oc_2985_aR	GTTTAGAGATCTAGGGGCTTGAAAGCTG		yam_O_contig_2122_a	Oc_2122_aL	TA	2	14	(TA)	7	(TA)7			Oc_2122_aL	(TA)7			Oc_2122_aL	TA				Oc_2122_a	Oc_2122_aL	180
Oc_2999_aL	CAGTTTTCCCAGTCACGACGTTATTCACTTCCCACATCTCCCA	Oc_2999_aR	GTTTAACAAGAGAGGAAATACAAGGTGTGTG	(AT)7	(AT)7	AT	94	104	94-104	Polymorphic													Oc_3971_aR	GTTTTTCCACAAGAATCAAGCTGGTAAT		yam_O_contig_2999_a	Oc_2999_aL	AT	2	14	(AT)	7	(AT)7			Oc_2999_aL	(AT)7			Oc_2999_aL	AT				Oc_2999_a	Oc_2999_aL	94
Oc_5740_aL	CAGTTTTCCCAGTCACGACCAGTATGCAGCGATGGACAATAAG	Oc_5740_aR	GTTTCACACAGCAATTTTTGGAGCTAGA	(AT)7	(AT)7	AT	122	124	122-124	Polymorphic													OsA8_c1060_15_aR	GTTTCAATTTTCATTTCTATATTCCCATCACA		yam_O_contig_5740_a	Oc_5740_aL	AT	2	14	(AT)	7	(AT)7			Oc_5740_aL	(AT)7			Oc_5740_aL	AT				Oc_5740_a	Oc_5740_aL	122
Os87_c5790_aL	CAGTTTTCCCAGTCACGACTTCACCACCAAAAAGCTTAAAAGG	Os87_c5790_aR	GTTTGTCCTCACTGACAAGATCATCGC	(GA)7	(GA)7	GA	127	129	127-129	Polymorphic													Oc_1364_aR	GTTTGAGATATAGGATCTCGGAGGAGGG		yam_O_singleton_87-01091-33_1_c5790_a	Os87_c5790_aL	GA	2	14	(GA)	7	(GA)7			Os87_c5790_aL	(GA)7			Os87_c5790_aL	GA				Os87_c5790_a	Os87_c5790_aL	127
Oc_232_aL	CAGTTTTCCCAGTCACGACATCCCGATTAAGGCCACAGC	Oc_232_aR	GTTTCCCTCTTCTCTTCGTCTTCTCTCC	(AG)7	(AG)7	AG	102	114	102-114	Polymorphic													Oc_5075_aR	GTTTAGAGGTACAAGGATTGCGAGTTTG		yam_O_contig_232_a	Oc_232_aL	AG	2	14	(AG)	7	(AG)7			Oc_232_aL	(AG)7			Oc_232_aL	AG				Oc_232_a	Oc_232_aL	102
Oc_2912_aL	CAGTTTTCCCAGTCACGACCATGTGAGGGAGAACTACACCAAA	Oc_2912_aR	GTTTTGGCTCTCTCATCAGCTTAGCTTT	(AG)7	(AG)7	AG	170	171	170-171	Polymorphic													Oc_2919_aR	GTTTACCGTAGCCTCCACCAGCAC		yam_O_contig_2912_a	Oc_2912_aL	AG	2	14	(AG)	7	(AG)7			Oc_2912_aL	(AG)7			Oc_2912_aL	AG				Oc_2912_a	Oc_2912_aL	170
Oc_2823_aL	CAGTTTTCCCAGTCACGACTCTCTGAGGAACTCTTCCTTCTCTCTT	Oc_2823_aR	GTTTATACTCGAGTCCTTTGACAAACCG	(TA)7	(TA)7	TA	104	106	104-106	Polymorphic													Oc_1547_aR	GTTTTAGCTTTGCTTGAGAATCAGGCTT		yam_O_contig_2823_a	Oc_2823_aL	TA	2	14	(TA)	7	(TA)7			Oc_2823_aL	(TA)7			Oc_2823_aL	TA				Oc_2823_a	Oc_2823_aL	104
OsA8_c8062_4_aL	CAGTTTTCCCAGTCACGACAACCAGAAGAATACACAGCGAAGC	OsA8_c8062_4_aR	GTTTAGTTCCTTCCTTCATTGGAGAACC	(AG)7	(AG)7	AG	152	154	152-154	Polymorphic													Oc_248_aR	GTTTTCTGCGTGCACGTTAGAGTCTATT		yam_O_singleton_A328-33_8_c8062_4_a	OsA8_c8062_4_aL	AG	2	14	(AG)	7	(AG)7			OsA8_c8062_4_aL	(AG)7			OsA8_c8062_4_aL	AG				OsA8_c8062_4_a	OsA8_c8062_4_aL	152
Oc_1015_aL	CAGTTTTCCCAGTCACGACTTTTGAGTGAACCAACCAATTTGA	Oc_1015_aR	GTTTTCACTGAAGGGAAGAGTAACTGGAA	(TC)7	(TC)7	TC	164	164	164-164	Monomorphic													Oc_4467_aR	GTTTAGACCTTCTTCTTGTTGGCCTTTC		yam_O_contig_1015_a	Oc_1015_aL	TC	2	14	(TC)	7	(TC)7			Oc_1015_aL	(TC)7			Oc_1015_aL	TC				Oc_1015_a	Oc_1015_aL	164
Oc_3113_bL	CAGTTTTCCCAGTCACGACTGAAGTCAATGCTCCATTTCATGT	Oc_3113_bR	GTTTAGCAAAATATACTTCACACCAATACGG	(TA)7	(TA)7	TA	147	154	147-154	Polymorphic													Oc_587_aR	GTTTTCCTCTTATGCATGCCCATTTATT		yam_O_contig_3113_b	Oc_3113_bL	TA	2	14	(TA)	7	(TA)7			Oc_3113_bL	(TA)7			Oc_3113_bL	TA				Oc_3113_b	Oc_3113_bL	147
Oc_5079_aL	CAGTTTTCCCAGTCACGACAGGTACCTACCCGTCGAGATTTGT	Oc_5079_aR	GTTTGTGTCATCCTCGTTGCACTTCAC	(TG)7	(TG)7	TG	181	181	181-181	Monomorphic													Os87_c4306_aR	GTTTTGTTAACTCGGCCACTTCGTACTC		yam_O_contig_5079_a	Oc_5079_aL	TG	2	14	(TG)	7	(TG)7			Oc_5079_aL	(TG)7			Oc_5079_aL	TG				Oc_5079_a	Oc_5079_aL	181
Oc_2231_aL	CAGTTTTCCCAGTCACGACGTCCTGCTTATGGACTTCCATGTT	Oc_2231_aR	GTTTTTTTGAAAGACACAGAGAGATCAACTG	(AT)7	(AT)7	AT	173	181	173-181	Polymorphic													Oc_6102_aR	GTTTGATGAGGATGTCTCTGCTCCTGAT		yam_O_contig_2231_a	Oc_2231_aL	AT	2	14	(AT)	7	(AT)7			Oc_2231_aL	(AT)7			Oc_2231_aL	AT				Oc_2231_a	Oc_2231_aL	173
OsA8_c12358_2_aL	CAGTTTTCCCAGTCACGACGGGATGTTTGAGAGAAGAAGCTCA	OsA8_c12358_2_aR	GTTTATTGCCTTGGTTCTCAGAGGATTT	(AG)7	(AG)7	AG	138	138	138-138	Monomorphic													Os87_lrc10849_aR	GTTTGTCATTGTCATTGTTTTTCCGTCC		yam_O_singleton_A328-33_8_c12358_2_a	OsA8_c12358_2_aL	AG	2	14	(AG)	7	(AG)7			OsA8_c12358_2_aL	(AG)7			OsA8_c12358_2_aL	AG				OsA8_c12358_2_a	OsA8_c12358_2_aL	138
Oc_2822_aL	CAGTTTTCCCAGTCACGACTTTTTCATTCTTTCACATTAATGATCTC	Oc_2822_aR	GTTTGGTGGATACTATGATGCACTTTGA	(TA)6	(TA)6	TA	176	182	176-182	Polymorphic													Oc_234_aR	GTTTTTTATTCATTTTTGCAATTAAACCACAA		yam_O_contig_2822_a	Oc_2822_aL	TA	2	12	(TA)	6	(TA)6			Oc_2822_aL	(TA)6			Oc_2822_aL	TA				Oc_2822_a	Oc_2822_aL	176
Oc_6024_aL	CAGTTTTCCCAGTCACGACTTTTCCTCTTTCCAGCAATGACAC	Oc_6024_aR	GTTTAAGGTTTTGGGTTTGGTTAGATGG	(AT)6	(AT)6	AT	121	121	121-121	Monomorphic													Os87_c878_aR	GTTTTTGGGCTTTCCTTGCAATCTATTA		yam_O_contig_6024_a	Oc_6024_aL	AT	2	12	(AT)	6	(AT)6			Oc_6024_aL	(AT)6			Oc_6024_aL	AT				Oc_6024_a	Oc_6024_aL	121
Oc_2072_bL	CAGTTTTCCCAGTCACGACCTTACTCCCATTTTACCCCTGACC	Oc_2072_bR	GTTTGGTCCATCTCAACCCATACATCAT	(TA)6	(TA)6	TA	159	159	159-159	Monomorphic													Oc_4934_aR	GTTTGCTATATACCTCCTCTCCGCGTCT		yam_O_contig_2072_b	Oc_2072_bL	TA	2	12	(TA)	6	(TA)6			Oc_2072_bL	(TA)6			Oc_2072_bL	TA				Oc_2072_b	Oc_2072_bL	159
OsA8_c9415_2_aL	CAGTTTTCCCAGTCACGACATATGCAAAGAGCCCACTTACTCG	OsA8_c9415_2_aR	GTTTTGATAGAGTCAAGGGAGAAATCCG	(TTA)4	(TTA)4	TTA	136	136	136-136	Monomorphic													Os87_c4306_aR	GTTTTGTTAACTCGGCCACTTCGTACTC		yam_O_singleton_A328-33_8_c9415_2_a	OsA8_c9415_2_aL	TTA	3	12	(TTA)	4	(TTA)4			OsA8_c9415_2_aL	(TTA)4			OsA8_c9415_2_aL	TTA				OsA8_c9415_2_a	OsA8_c9415_2_aL	136
Oc_5062_bL	CAGTTTTCCCAGTCACGACTCACTGCTTCTCTTGCTCATCATC	Oc_5062_bR	GTTTGATCCTCAATCTCAACGCTGTTCT	(GAG)4	(GAG)4	GAG	166	169	166-169	Polymorphic																yam_O_contig_5062_b	Oc_5062_bL	GAG	3	12	(GAG)	4	(GAG)4			Oc_5062_bL	(GAG)4			Oc_5062_bL	GAG				Oc_5062_b	Oc_5062_bL	166
Oc_4943_bL	CAGTTTTCCCAGTCACGACGTGTGATGGTGGCAATTAAGTCTC	Oc_4943_bR	GTTTTGCTACTAACACAGCCATGATAAGG	(TGT)4	(TGT)4	TGT	169	169	169-169	Monomorphic													Oc_3654_aL	CAGTTTTCCCAGTCACGACGGTTGAGTAACGCGAACATTCACT		yam_O_contig_4943_b	Oc_4943_bL	TGT	3	12	(TGT)	4	(TGT)4			Oc_4943_bL	(TGT)4			Oc_4943_bL	TGT				Oc_4943_b	Oc_4943_bL	169
Oc_4873_aL	CAGTTTTCCCAGTCACGACTGGAGTGTTAGCAAGTAAGGTGGA	Oc_4873_aR	GTTTATTCCATGCAACAATACAGCAAAA	(AT)6	(AT)6	AT	118	143	118-143	Polymorphic													Oc_3101_aL	CAGTTTTCCCAGTCACGACCCTAGAGGGAAGTCACAGGTTGAA		yam_O_contig_4873_a	Oc_4873_aL	AT	2	12	(AT)	6	(AT)6			Oc_4873_aL	(AT)6			Oc_4873_aL	AT				Oc_4873_a	Oc_4873_aL	118
Oc_2415_aL	CAGTTTTCCCAGTCACGACTGGGCCCTACAGATATTTTCTTGA	Oc_2415_aR	GTTTGATCCTCTCATCCATGTCTTGCTT	(AGG)4	(AGG)4	AGG	116	125	116-125	Polymorphic													Oc_4395_aL	CAGTTTTCCCAGTCACGACTGAATCAATTGTATAGCAGGGTGG		yam_O_contig_2415_a	Oc_2415_aL	AGG	3	12	(AGG)	4	(AGG)4			Oc_2415_aL	(AGG)4			Oc_2415_aL	AGG				Oc_2415_a	Oc_2415_aL	116
Oc_1113_aL	CAGTTTTCCCAGTCACGACTCTAAGAAGCATGGGAAGAAATGG	Oc_1113_aR	GTTTTTTAATGACAAGGACACAACATCAGA	(ATC)4	(ATC)4	ATC	112	118	112-118	Polymorphic													Oc_360_aL	CAGTTTTCCCAGTCACGACTCTCTTCTGGATTCCTTCGTGAAC		yam_O_contig_1113_a	Oc_1113_aL	ATC	3	12	(ATC)	4	(ATC)4			Oc_1113_aL	(ATC)4			Oc_1113_aL	ATC				Oc_1113_a	Oc_1113_aL	112
Oc_6679_aL	CAGTTTTCCCAGTCACGACAAGAAGAGGCTGCTATCCTTCCTG	Oc_6679_aR	GTTTCAATACCCATCTGCTCCTCTTCAG	(GAA)4	(GAA)4	GAA	125	125	125-125	Monomorphic													Oc_205_aL	CAGTTTTCCCAGTCACGACTTTGGGATCAAAACATAGATACACACA		yam_O_contig_6679_a	Oc_6679_aL	GAA	3	12	(GAA)	4	(GAA)4			Oc_6679_aL	(GAA)4			Oc_6679_aL	GAA				Oc_6679_a	Oc_6679_aL	125
Oc_3396_bL	CAGTTTTCCCAGTCACGACTTCAGCTTCAAATGGCAGTAAACA	Oc_3396_bR	GTTTAAGCAGTTACTTTCCTCCTCGCTT	(GTG)4	(GTG)4	GTG	130	130	130-130	Monomorphic													Oc_3981_aL	CAGTTTTCCCAGTCACGACATGAGGGTTTGTATGTGTGAGGAA		yam_O_contig_3396_b	Oc_3396_bL	GTG	3	12	(GTG)	4	(GTG)4			Oc_3396_bL	(GTG)4			Oc_3396_bL	GTG				Oc_3396_b	Oc_3396_bL	130
Oc_1019_aL	CAGTTTTCCCAGTCACGACTCAACAACGGAGGTTTAGTGTGAA	Oc_1019_aR	GTTTTGGTCCTACTCCCACTACTCCAAG	(GGC)4	(GGC)4	GGC	511	524	511-524	Polymorphic													OsA8_c3645_12_aL	CAGTTTTCCCAGTCACGACGCTTACTGAAGAAGAATTGGCTGC		yam_O_contig_1019_a	Oc_1019_aL	GGC	3	12	(GGC)	4	(GGC)4			Oc_1019_aL	(GGC)4			Oc_1019_aL	GGC				Oc_1019_a	Oc_1019_aL	511
Oc_4991_aL	CAGTTTTCCCAGTCACGACGTCTCTGCTTTCCGTTCCTTTGT	Oc_4991_aR	GTTTGCTAAACCTCCACAAAAACTCCAA	(CT)6	(CT)6	CT	162	168	162-168	Polymorphic													Oc_3514_aL	CAGTTTTCCCAGTCACGACCATTCCTCCGATCAGAGCCTAAC		yam_O_contig_4991_a	Oc_4991_aL	CT	2	12	(CT)	6	(CT)6			Oc_4991_aL	(CT)6			Oc_4991_aL	CT				Oc_4991_a	Oc_4991_aL	162
Oc_5784_aL	CAGTTTTCCCAGTCACGACATACACCCAACCACACCATCTCTC	Oc_5784_aR	GTTTAAGGTGGCCGCAGTGTATTTTTAT	(TA)6	(TA)6	TA	177	179	177-179	Polymorphic													Oc_3514cL	CAGTTTTCCCAGTCACGACCTTCAAGCTCAGTACCAGGCAG		yam_O_contig_5784_a	Oc_5784_aL	TA	2	12	(TA)	6	(TA)6			Oc_5784_aL	(TA)6			Oc_5784_aL	TA				Oc_5784_a	Oc_5784_aL	177
Oc_5573_aL	CAGTTTTCCCAGTCACGACAAGATATGAATCATCCTCAAAGACAAA	Oc_5573_aR	GTTTATGGCATACCACATAAAGTTGAGC	(AT)6	(AT)6	AT	175	179	175-179	Polymorphic													Oc_3758cL	CAGTTTTCCCAGTCACGACAATGGTGCAAATAGATCCCATTTCT		yam_O_contig_5573_a	Oc_5573_aL	AT	2	12	(AT)	6	(AT)6			Oc_5573_aL	(AT)6			Oc_5573_aL	AT				Oc_5573_a	Oc_5573_aL	175
Oc_5825_aL	CAGTTTTCCCAGTCACGACAGCTAAACATTGTGCCAAATCCAT	Oc_5825_aR	GTTTTGAGAAATTGTGAACCTCATCATCA	(TA)6	(TA)6	TA	161	165	161-165	Polymorphic													Oc_1833_aL	CAGTTTTCCCAGTCACGACTACTGCGTGCTAGGCAATCTGTAG		yam_O_contig_5825_a	Oc_5825_aL	TA	2	12	(TA)	6	(TA)6			Oc_5825_aL	(TA)6			Oc_5825_aL	TA				Oc_5825_a	Oc_5825_aL	161
Os87_c2900_aL	CAGTTTTCCCAGTCACGACGTCTCATGCTAGAGAACCACCACA	Os87_c2900_aR	GTTTAACGAAACTAGCAGCAGAAGCATT	(TGA)4	(TGA)4	TGA	136	136	136-136	Monomorphic													Oc_586_aL	CAGTTTTCCCAGTCACGACGATGCTGCTGTCTCGGTTTATCAT		yam_O_singleton_87-01091-33_1_c2900_a	Os87_c2900_aL	TGA	3	12	(TGA)	4	(TGA)4			Os87_c2900_aL	(TGA)4			Os87_c2900_aL	TGA				Os87_c2900_a	Os87_c2900_aL	136
Oc_6126_aL	CAGTTTTCCCAGTCACGACGAATAACTGAGGGCGACAGTAACG	Oc_6126_aR	GTTTACCAACATCTGAGTCAAAGGGAAA	(TC)6	(TC)6	TC	146	150	146-150	Polymorphic													Oc_5440_aL	CAGTTTTCCCAGTCACGACTGTTCCTTACCTTCTCAAAGAGACTCA		yam_O_contig_6126_a	Oc_6126_aL	TC	2	12	(TC)	6	(TC)6			Oc_6126_aL	(TC)6			Oc_6126_aL	TC				Oc_6126_a	Oc_6126_aL	146
Oc_5955_aL	CAGTTTTCCCAGTCACGACGACTGAACATGAACCAGTTCAAACA	Oc_5955_aR	GTTTTTACCAGATGACAATCAAGATGCC	(TTA)4	(TTA)4	TTA	125	133	125-133	Polymorphic													Os87_c937_aL	CAGTTTTCCCAGTCACGACCTATTCCTGCCCAAGACTATCCCT		yam_O_contig_5955_a	Oc_5955_aL	TTA	3	12	(TTA)	4	(TTA)4			Oc_5955_aL	(TTA)4			Oc_5955_aL	TTA				Oc_5955_a	Oc_5955_aL	125
Os87_c11820_aL	CAGTTTTCCCAGTCACGACCTCTGAAAACAGGAGATCGGCTAA	Os87_c11820_aR	GTTTCCTCCTTCTCTTGATCTCAACCCT	(GAG)4	(GAG)4	GAG	0	0	-	Didn't Work													Oc_951_aL	CAGTTTTCCCAGTCACGACAAGTCTCGAGCATTCCCCTACTCT		yam_O_singleton_87-01091-33_1_c11820_a	Os87_c11820_aL	GAG	3	12	(GAG)	4	(GAG)4			Os87_c11820_aL	(GAG)4			Os87_c11820_aL	GAG				Os87_c11820_a	Os87_c11820_aL
Os87_c9202_aL	CAGTTTTCCCAGTCACGACACCACCTCGAGATCAGGAACACT	Os87_c9202_aR	GTTTTGTTCGTCTTCATCCTCTTCCTTC	(ACA)4	(ACA)4	ACA	140	144	140-144	Polymorphic													Oc_5610_aL	CAGTTTTCCCAGTCACGACCCCTTCTCCATCTCCTTCTTCTCT		yam_O_singleton_87-01091-33_1_c9202_a	Os87_c9202_aL	ACA	3	12	(ACA)	4	(ACA)4			Os87_c9202_aL	(ACA)4			Os87_c9202_aL	ACA				Os87_c9202_a	Os87_c9202_aL	140
Oc_223_aL	CAGTTTTCCCAGTCACGACATACCCTAACCTCAAACTCTCCGC	Oc_223_aR	GTTTGATGTTGAGAACGAGGAGGGAGTA	(CGG)4	(CGG)4	CGG	153	153	153-153	Monomorphic													Oc_3321_aL	CAGTTTTCCCAGTCACGACGCTATTTCATCTTGTTTTTCCCCC		yam_O_contig_223_a	Oc_223_aL	CGG	3	12	(CGG)	4	(CGG)4			Oc_223_aL	(CGG)4			Oc_223_aL	CGG				Oc_223_a	Oc_223_aL	153
Oc_3585_aL	CAGTTTTCCCAGTCACGACGTATCAAGGTGAAGGTGCTGGAAT	Oc_3585_aR	GTTTTCCTATTTACAAGAAGCCATTGCC	(CTG)4	(CTG)4	CTG	157	157	157-157	Monomorphic													Oc_6254_aL	CAGTTTTCCCAGTCACGACGACGTTATCTCCATTGCTTCGTCT		yam_O_contig_3585_a	Oc_3585_aL	CTG	3	12	(CTG)	4	(CTG)4			Oc_3585_aL	(CTG)4			Oc_3585_aL	CTG				Oc_3585_a	Oc_3585_aL	157
Oc_3785_bL	CAGTTTTCCCAGTCACGACTAGGCTGTTCTTGCTTCTTCCATC	Oc_3785_bR	GTTTCAATATCCGGTCCAAATTGATGAT	(TCA)4	(TCA)4	TCA	0	0	-	Didn't Work													Oc_446_aL	CAGTTTTCCCAGTCACGACCTAAGCCTCCGACGAAGAAGC		yam_O_contig_3785_b	Oc_3785_bL	TCA	3	12	(TCA)	4	(TCA)4			Oc_3785_bL	(TCA)4			Oc_3785_bL	TCA				Oc_3785_b	Oc_3785_bL
Oc_22_aL	CAGTTTTCCCAGTCACGACTCGGCATTCTCTGCTTATATTTCC	Oc_22_aR	GTTTTGGCTTACAGCATTGTCCAAAGTA	(CAG)4	(CAG)4	CAG	252	252	252-252	Monomorphic													Oc_5376_aL	CAGTTTTCCCAGTCACGACCCGCAGGCCAATAATAAAGTAAGA		yam_O_contig_22_a	Oc_22_aL	CAG	3	12	(CAG)	4	(CAG)4			Oc_22_aL	(CAG)4			Oc_22_aL	CAG				Oc_22_a	Oc_22_aL	252
Oc_346_aL	CAGTTTTCCCAGTCACGACATTTCCAGGCTCATTTATGCAAAG	Oc_346_aR	GTTTTTTGCATAGAGAACTCCACAAGACA	(TA)6	(TA)6	TA	114	116	114-116	Polymorphic													Oc_1086_aL	CAGTTTTCCCAGTCACGACGAATTCCCGGGATAAACCAACT		yam_O_contig_346_a	Oc_346_aL	TA	2	12	(TA)	6	(TA)6			Oc_346_aL	(TA)6			Oc_346_aL	TA				Oc_346_a	Oc_346_aL	114
Oc_5073_aL	CAGTTTTCCCAGTCACGACCCAGAGTTCCTTAAAGCCAATCAA	Oc_5073_aR	GTTTTCATCGTCCTCTTCCTTTCAGAAT	(AT)6	(AT)6	AT	161	165	161-165	Polymorphic													Oc_512_aL	CAGTTTTCCCAGTCACGACGTCCCAAGCTGCTACCCTGAATA		yam_O_contig_5073_a	Oc_5073_aL	AT	2	12	(AT)	6	(AT)6			Oc_5073_aL	(AT)6			Oc_5073_aL	AT				Oc_5073_a	Oc_5073_aL	161
Oc_400_aL	CAGTTTTCCCAGTCACGACGCACCATTGTCTTAACTTCCAAGG	Oc_400_aR	GTTTGTAGAGCCCGAGTGATCGGAG	(CCG)4	(CCG)4	CCG	160	160	160-160	Monomorphic													Oc_1038_aL	CAGTTTTCCCAGTCACGACATAGGGACGAGACTCAGGACCAG		yam_O_contig_400_a	Oc_400_aL	CCG	3	12	(CCG)	4	(CCG)4			Oc_400_aL	(CCG)4			Oc_400_aL	CCG				Oc_400_a	Oc_400_aL	160
OsA8_c9804_3_aL	CAGTTTTCCCAGTCACGACAACAAAATTGAACACGATAATAACCGA	OsA8_c9804_3_aR	GTTTTTTTTGCTTTTGGTTTGATTCGAT	(ATT)4	(ATT)4	ATT	131	131	131-131	Monomorphic													Oc_5776_bL	CAGTTTTCCCAGTCACGACCGGAATCAAGCTGTGTTACTGATG		yam_O_singleton_A328-33_8_c9804_3_a	OsA8_c9804_3_aL	ATT	3	12	(ATT)	4	(ATT)4			OsA8_c9804_3_aL	(ATT)4			OsA8_c9804_3_aL	ATT				OsA8_c9804_3_a	OsA8_c9804_3_aL	131
Os87_c7755_aL	CAGTTTTCCCAGTCACGACGGAACACAAACCTCAAGGATGC	Os87_c7755_aR	GTTTGGTACGCGTTTTTCCTTCTCTTG	(GAG)4	(GAG)4	GAG	0	0	-	Didn't Work													Oc_7199_aL	CAGTTTTCCCAGTCACGACAGCAGAGTGTTTTAGCCAATGTGA		yam_O_singleton_87-01091-33_1_c7755_a	Os87_c7755_aL	GAG	3	12	(GAG)	4	(GAG)4			Os87_c7755_aL	(GAG)4			Os87_c7755_aL	GAG				Os87_c7755_a	Os87_c7755_aL
Oc_1612_aL	CAGTTTTCCCAGTCACGACATCGAGAAAATAGGCACCAATTCA	Oc_1612_aR	GTTTTTTATCATCCACCGCTCTCCAC	(GAG)4	(GAG)4	GAG	160	160	160-160	Monomorphic													Oc_1786_aL	CAGTTTTCCCAGTCACGACCTTCTTGGTCCACTTGCTCAACTT		yam_O_contig_1612_a	Oc_1612_aL	GAG	3	12	(GAG)	4	(GAG)4			Oc_1612_aL	(GAG)4			Oc_1612_aL	GAG				Oc_1612_a	Oc_1612_aL	160
Oc_3605_aL	CAGTTTTCCCAGTCACGACTCATCTGACAGTATGCGAATGAAAA	Oc_3605_aR	GTTTATAGCTCCAATTAGTGGATGGCAA	(TG)6	(TG)6	TG	174	190	174-190	Polymorphic													Oc_4851_bL	CAGTTTTCCCAGTCACGACGTTCTTGATGTCTGCTGCGAATTA		yam_O_contig_3605_a	Oc_3605_aL	TG	2	12	(TG)	6	(TG)6			Oc_3605_aL	(TG)6			Oc_3605_aL	TG				Oc_3605_a	Oc_3605_aL	174
Oc_778cL	CAGTTTTCCCAGTCACGACCTTCTTGAACAGATGTTTGGCTCT	Oc_778cR	GTTTTTTTTCTATCACAAGTTTCTTCCTTTTT	(GAT)4	(GAT)4	GAT	158	158	158-158	Monomorphic													Oc_898_aL	CAGTTTTCCCAGTCACGACAAACCATCCTTGTCACAACACCTAA		yam_O_contig_778_c	Oc_778cL	GAT	3	12	(GAT)	4	(GAT)4			Oc_778cL	(GAT)4			Oc_778cL	GAT				Oc_778c	Oc_778cL	158
Oc_825_aL	CAGTTTTCCCAGTCACGACCAATGAAGTCTGATATACACCGCGT	Oc_825_aR	GTTTGCTTCATTGTTTGCTCCTTCAAGT	(AG)6	(AG)6	AG	154	154	154-154	Monomorphic													Oc_4953_dL	CAGTTTTCCCAGTCACGACGGTTAGGAATGGGAGAATGATTGA		yam_O_contig_825_a	Oc_825_aL	AG	2	12	(AG)	6	(AG)6			Oc_825_aL	(AG)6			Oc_825_aL	AG				Oc_825_a	Oc_825_aL	154
Oc_539_aL	CAGTTTTCCCAGTCACGACGTGGAGGAGTCTTTGGATTCTTGA	Oc_539_aR	GTTTTTTGTTACTCAGAAAATGCCACCA	(TTG)4	(TTG)4	TTG	139	171	139-171	Polymorphic													Oc_5519_aL	CAGTTTTCCCAGTCACGACGCAAAGGAAAAGCTAGCATCAAAG		yam_O_contig_539_a	Oc_539_aL	TTG	3	12	(TTG)	4	(TTG)4			Oc_539_aL	(TTG)4			Oc_539_aL	TTG				Oc_539_a	Oc_539_aL	139
Oc_3885_aL	CAGTTTTCCCAGTCACGACGATCCCTCCTTCCTGTTCCTCTT	Oc_3885_aR	GTTTGGACGAGGAGGAGCTCAGTGTAG	(CTC)4	(CTC)4	CTC	156	172	156-172	Polymorphic													Oc_5824_aL	CAGTTTTCCCAGTCACGACGCTGAGAAGAGATCGAAGATGGTG		yam_O_contig_3885_a	Oc_3885_aL	CTC	3	12	(CTC)	4	(CTC)4			Oc_3885_aL	(CTC)4			Oc_3885_aL	CTC				Oc_3885_a	Oc_3885_aL	156
Oc_7086_aL	CAGTTTTCCCAGTCACGACTCCTAGTGTTCTTAAAGTTTGCCTTCC	Oc_7086_aR	GTTTTGATTAGCATAGGCGCTGAAAGAT	(TA)6	(TA)6	TA	177	177	177-177	Monomorphic													Oc_3199_aL	CAGTTTTCCCAGTCACGACCACAAACACTGGGACTTTTCATCA		yam_O_contig_7086_a	Oc_7086_aL	TA	2	12	(TA)	6	(TA)6			Oc_7086_aL	(TA)6			Oc_7086_aL	TA				Oc_7086_a	Oc_7086_aL	177
Oc_2051_aL	CAGTTTTCCCAGTCACGACAACCGAGGCAACATGAGTACCTTA	Oc_2051_aR	GTTTGCTGCTGTTGCTGTAACTGTTGTT	(CAG)4	(CAG)4	CAG	159	168	159-168	Polymorphic													Oc_2547_aL	CAGTTTTCCCAGTCACGACCAAAAGTTTCCACAACCTCTCTGG		yam_O_contig_2051_a	Oc_2051_aL	CAG	3	12	(CAG)	4	(CAG)4			Oc_2051_aL	(CAG)4			Oc_2051_aL	CAG				Oc_2051_a	Oc_2051_aL	159
Oc_917_bL	CAGTTTTCCCAGTCACGACCAGCAGTAGTTCAGGTGAGAGCAG	Oc_917_bR	GTTTAATCATAACCAAACTCATCCTCGC	(GAA)4	(GAA)4	GAA	165	165	165-165	Monomorphic													Oc_2852_aL	CAGTTTTCCCAGTCACGACAATGCTTGCTGACAAAGGCAA		yam_O_contig_917_b	Oc_917_bL	GAA	3	12	(GAA)	4	(GAA)4			Oc_917_bL	(GAA)4			Oc_917_bL	GAA				Oc_917_b	Oc_917_bL	165
Oc_768_aL	CAGTTTTCCCAGTCACGACGATAGAAGATCCGATTCCCTCCTC	Oc_768_aR	GTTTCTGCGGTATAGGAGATCCTTGAGA	(TCC)4	(TCC)4	TCC	127	169	127-169	Polymorphic													Os87_c4483_aL	CAGTTTTCCCAGTCACGACCTTCTTCTTTGCTTCTCGTTCTCG		yam_O_contig_768_a	Oc_768_aL	TCC	3	12	(TCC)	4	(TCC)4			Oc_768_aL	(TCC)4			Oc_768_aL	TCC				Oc_768_a	Oc_768_aL	127
Oc_894_aL	CAGTTTTCCCAGTCACGACGGAACTGCCAATCAAGAAGGTAGA	Oc_894_aR	GTTTCCCTTACTCTCCCCAAACTTCATT	(TTA)4	(TTA)4	TTA	179	179	179-179	Monomorphic													Oc_5393_aL	CAGTTTTCCCAGTCACGACTTGTCCATCTTTTGGGGTACTGTT		yam_O_contig_894_a	Oc_894_aL	TTA	3	12	(TTA)	4	(TTA)4			Oc_894_aL	(TTA)4			Oc_894_aL	TTA				Oc_894_a	Oc_894_aL	179
Oc_4003_aL	CAGTTTTCCCAGTCACGACTGAAGAAGAATTACCGGACTTTGC	Oc_4003_aR	GTTTCATGAACAGAAACATCTCCGACAA	(TGA)4	(TGA)4	TGA	177	177	177-177	Monomorphic													Oc_6407_aL	CAGTTTTCCCAGTCACGACCGGGAAACAAATAACAATACCCTTC		yam_O_contig_4003_a	Oc_4003_aL	TGA	3	12	(TGA)	4	(TGA)4			Oc_4003_aL	(TGA)4			Oc_4003_aL	TGA				Oc_4003_a	Oc_4003_aL	177
Oc_5847_aL	CAGTTTTCCCAGTCACGACGCTAGCAAGCAGAAAACCTATCCA	Oc_5847_aR	GTTTGGCATAAGAGAGCTCCCATTTCTT	(GAA)4	(GAA)4	GAA	153	154	153-154	Polymorphic													Oc_5164_bL	CAGTTTTCCCAGTCACGACTATGAGCAATGGTTGAGAAGGACA		yam_O_contig_5847_a	Oc_5847_aL	GAA	3	12	(GAA)	4	(GAA)4			Oc_5847_aL	(GAA)4			Oc_5847_aL	GAA				Oc_5847_a	Oc_5847_aL	153
OsA8_c14040_2_aL	CAGTTTTCCCAGTCACGACCATCCACAGTGGTTTTAGTGCTTG	OsA8_c14040_2_aR	GTTTCCCTCAAGGCATGTTTAACACAATA	(AT)6	(AT)6	AT	137	141	137-141	Polymorphic													Oc_6262_aL	CAGTTTTCCCAGTCACGACCGGGATTGATAAAGGACTTGAAAA		yam_O_singleton_A328-33_8_c14040_2_a	OsA8_c14040_2_aL	AT	2	12	(AT)	6	(AT)6			OsA8_c14040_2_aL	(AT)6			OsA8_c14040_2_aL	AT				OsA8_c14040_2_a	OsA8_c14040_2_aL	137
Oc_1782_aL	CAGTTTTCCCAGTCACGACATCAAGCGGAAGTAGTAGCAGTGG	Oc_1782_aR	GTTTTGTTGCTGTCTTTTGGTTGTTGTT	(GCA)4	(GCA)4	GCA	159	159	159-159	Monomorphic													Oc_718_aL	CAGTTTTCCCAGTCACGACGCAGGGGAAACTATGTCAAGATGT		yam_O_contig_1782_a	Oc_1782_aL	GCA	3	12	(GCA)	4	(GCA)4			Oc_1782_aL	(GCA)4			Oc_1782_aL	GCA				Oc_1782_a	Oc_1782_aL	159
Oc_6184_aL	CAGTTTTCCCAGTCACGACAACAACATCAACGCAAACCTAGC	Oc_6184_aR	GTTTGTCGATGAGATCCTCGGTAGTGAC	(CTC)4	(CTC)4	CTC	122	122	122-122	Monomorphic													Oc_1086_aL	CAGTTTTCCCAGTCACGACGAATTCCCGGGATAAACCAACT		yam_O_contig_6184_a	Oc_6184_aL	CTC	3	12	(CTC)	4	(CTC)4			Oc_6184_aL	(CTC)4			Oc_6184_aL	CTC				Oc_6184_a	Oc_6184_aL	122
OsA8_c5278_6_aL	CAGTTTTCCCAGTCACGACACCATCTTCCTCTCCATCCTTAGC	OsA8_c5278_6_aR	GTTTGGTGAAGAGGAATCTGATGCAAGT	(AGC)4	(AGC)4	AGC	293	322	293-322	Polymorphic													Oc_4868_aL	CAGTTTTCCCAGTCACGACACTAAATTCCCATTCCTGTTCCGT		yam_O_singleton_A328-33_8_c5278_6_a	OsA8_c5278_6_aL	AGC	3	12	(AGC)	4	(AGC)4			OsA8_c5278_6_aL	(AGC)4			OsA8_c5278_6_aL	AGC				OsA8_c5278_6_a	OsA8_c5278_6_aL	293
Oc_815_bL	CAGTTTTCCCAGTCACGACTTTATGACATGCTCCAGGTGCTTA	Oc_815_bR	GTTTTTTTACCCCTAACCAAACCAAACA	(CTT)4	(CTT)4	CTT	0	0	-	Didn't Work													Oc_3279_aL	CAGTTTTCCCAGTCACGACTCGTATTGAAGCAGCTCATGAAAG		yam_O_contig_815_b	Oc_815_bL	CTT	3	12	(CTT)	4	(CTT)4			Oc_815_bL	(CTT)4			Oc_815_bL	CTT				Oc_815_b	Oc_815_bL
Oc_101_aL	CAGTTTTCCCAGTCACGACTTCTTCGGTATTTTGGTGGGATTA	Oc_101_aR	GTTTAATGAAAAGCCTAAGCAGTCACCA	(TTC)4	(TTC)4	TTC	168	174	168-174	Polymorphic													Os87_c10801_aL	CAGTTTTCCCAGTCACGACTCCATGAACTGGATTTATGATTTTGA		yam_O_contig_101_a	Oc_101_aL	TTC	3	12	(TTC)	4	(TTC)4			Oc_101_aL	(TTC)4			Oc_101_aL	TTC				Oc_101_a	Oc_101_aL	168
Oc_827_aL	CAGTTTTCCCAGTCACGACCCTCCGAAACCTAAAGATCCACTT	Oc_827_aR	GTTTGTCTCCCACGCCCTCTCTTC	(GGC)4	(GGC)4	GGC	181	184	181-184	Polymorphic													Oc_3451_aL	CAGTTTTCCCAGTCACGACGAAAAGGCTCATCTTTTCCTCTCC		yam_O_contig_827_a	Oc_827_aL	GGC	3	12	(GGC)	4	(GGC)4			Oc_827_aL	(GGC)4			Oc_827_aL	GGC				Oc_827_a	Oc_827_aL	181
Oc_139_aL	CAGTTTTCCCAGTCACGACTTCCCGGGATCATCAAATCTC	Oc_139_aR	GTTTATCGTTCACGAAGAAGAGATCGAG	(TCT)4	(TCT)4	TCT	0	0	-	Didn't Work													Os87_lrc4485_aL	CAGTTTTCCCAGTCACGACCAATGGCTGGGAAACTGATACACT		yam_O_contig_139_a	Oc_139_aL	TCT	3	12	(TCT)	4	(TCT)4			Oc_139_aL	(TCT)4			Oc_139_aL	TCT				Oc_139_a	Oc_139_aL
Oc_5500_bL	CAGTTTTCCCAGTCACGACCATATCTCACCGGCTTGGGA	Oc_5500_bR	GTTTTTCGTTCTTCGATTTCATCAATCA	(GTG)4	(GTG)4	GTG	150	150	150-150	Monomorphic													Oc_6996_aL	CAGTTTTCCCAGTCACGACTTAAATAGTGCTCTTCGGATTGCC		yam_O_contig_5500_b	Oc_5500_bL	GTG	3	12	(GTG)	4	(GTG)4			Oc_5500_bL	(GTG)4			Oc_5500_bL	GTG				Oc_5500_b	Oc_5500_bL	150
OsA8_c12198_2_aL	CAGTTTTCCCAGTCACGACGAGCTGCACAAACACCATTTCTTA	OsA8_c12198_2_aR	GTTTGAACAGTCTCCCGAAACAGAAAAA	(CCA)4	(CCA)4	CCA	123	123	123-123	Monomorphic													Oc_1520_aL	CAGTTTTCCCAGTCACGACGTGGGTTTGGTAAAGGGAACTTCT		yam_O_singleton_A328-33_8_c12198_2_a	OsA8_c12198_2_aL	CCA	3	12	(CCA)	4	(CCA)4			OsA8_c12198_2_aL	(CCA)4			OsA8_c12198_2_aL	CCA				OsA8_c12198_2_a	OsA8_c12198_2_aL	123
Oc_700_aL	CAGTTTTCCCAGTCACGACAGTCAGTTTTGGTAGGGCTGAGTG	Oc_700_aR	GTTTATAGAAATTGATTTGCCACACCGT	(GTA)4	(GTA)4	GTA	0	0	-	Didn't Work													Oc_3654_aR	GTTTGGCAACGAATGGAAAAGAATCAAT		yam_O_contig_700_a	Oc_700_aL	GTA	3	12	(GTA)	4	(GTA)4			Oc_700_aL	(GTA)4			Oc_700_aL	GTA				Oc_700_a	Oc_700_aL
Oc_2103_aL	CAGTTTTCCCAGTCACGACGAGAGCAACATGAATGATCTGGTG	Oc_2103_aR	GTTTCCAATTAATTTGGCTCCTCTTCCT	(GAA)4	(GAA)4	GAA	131	131	131-131	Monomorphic													Oc_3101_aR	GTTTACCCATAGAAACCCTAATCAAGCC		yam_O_contig_2103_a	Oc_2103_aL	GAA	3	12	(GAA)	4	(GAA)4			Oc_2103_aL	(GAA)4			Oc_2103_aL	GAA				Oc_2103_a	Oc_2103_aL	131
OsB9_c454_44cL	CAGTTTTCCCAGTCACGACGTGTTCCTTGTGTTTGTGATGCTT	OsB9_c454_44cR	GTTTAATCAAGATCAAATGGCTGAGGAG	(TTC)4	(TTC)4	TTC	165	168	165-168	Polymorphic													Oc_4395_aR	GTTTCAATTTCCCTGGTGATAAAGTTTTG		yam_O_singleton_B310-33_9_c454_44_c	OsB9_c454_44cL	TTC	3	12	(TTC)	4	(TTC)4			OsB9_c454_44cL	(TTC)4			OsB9_c454_44cL	TTC				OsB9_c454_44c	OsB9_c454_44cL	165
Oc_6057_aL	CAGTTTTCCCAGTCACGACTTTAGGCCTTCATTGGTTGTTCAT	Oc_6057_aR	GTTTCCACTGATTACTTGTGCTCTCATTCT	(TA)6	(TA)6	TA	111	113	111-113	Polymorphic													Oc_360_aR	GTTTAAAATCCACAAAGCAATCATCACTC		yam_O_contig_6057_a	Oc_6057_aL	TA	2	12	(TA)	6	(TA)6			Oc_6057_aL	(TA)6			Oc_6057_aL	TA				Oc_6057_a	Oc_6057_aL	111
Oc_4843_aL	CAGTTTTCCCAGTCACGACGGACTTCTAGCTGGAGGTGCTCTA	Oc_4843_aR	GTTTTCCAAGTCTTTACATTGCGAGGAT	(TTC)4	(TTC)4	TTC	180	186	180-186	Polymorphic													Oc_205_aR	GTTTTGGCATCAACTGGTCATTAAGTGT		yam_O_contig_4843_a	Oc_4843_aL	TTC	3	12	(TTC)	4	(TTC)4			Oc_4843_aL	(TTC)4			Oc_4843_aL	TTC				Oc_4843_a	Oc_4843_aL	180
Oc_6227_aL	CAGTTTTCCCAGTCACGACTTTTACCCCTCCCGATCCGT	Oc_6227_aR	GTTTATTAATAAGGCAGATGCCGACGTT	(CGC)4	(CGC)4	CGC	170	178	170-178	Polymorphic													Oc_3981_aR	GTTTTTTTTGTCTTTGGCTTGTAAACTAATTC		yam_O_contig_6227_a	Oc_6227_aL	CGC	3	12	(CGC)	4	(CGC)4			Oc_6227_aL	(CGC)4			Oc_6227_aL	CGC				Oc_6227_a	Oc_6227_aL	170
Oc_4324_bL	CAGTTTTCCCAGTCACGACATGTTTTCCACCATCACCTAATGC	Oc_4324_bR	GTTTCTGATGAGAACTAGAGATGCCGGT	(CA)6	(CA)6	CA	117	117	117-117	Monomorphic													OsA8_c3645_12_aR	GTTTTTGCATCTTGGTGAAGGAGTTGTA		yam_O_contig_4324_b	Oc_4324_bL	CA	2	12	(CA)	6	(CA)6			Oc_4324_bL	(CA)6			Oc_4324_bL	CA				Oc_4324_b	Oc_4324_bL	117
Oc_3544_aL	CAGTTTTCCCAGTCACGACTCTCACTCAGTCGAACAGCAAAAC	Oc_3544_aR	GTTTGGGAGGACAAAGAGAAAGCACATA	(GAT)4	(GAT)4	GAT	135	135	135-135	Monomorphic													Oc_3514_aR	GTTTGGCGGTAGTTGTTGTTGTAGTTGTT		yam_O_contig_3544_a	Oc_3544_aL	GAT	3	12	(GAT)	4	(GAT)4			Oc_3544_aL	(GAT)4			Oc_3544_aL	GAT				Oc_3544_a	Oc_3544_aL	135
Oc_1612_aL	CAGTTTTCCCAGTCACGACATCGAGAAAATAGGCACCAATTCA	Oc_1612_aR	GTTTTTTATCATCCACCGCTCTCCAC	(GAG)4	(GAG)4	GAG	160	160	160-160	Monomorphic													Oc_3514cR	GTTTAAAAACAAAATACTCCTCTGCTAATCAC		yam_O_contig_1612_a	Oc_1612_aL	GAG	3	12	(GAG)	4	(GAG)4			Oc_1612_aL	(GAG)4			Oc_1612_aL	GAG				Oc_1612_a	Oc_1612_aL	160
Oc_1165_aL	CAGTTTTCCCAGTCACGACAGTTTTGGTTGGCATTTGAAGAAG	Oc_1165_aR	GTTTAAACCAACTCAAAAGCTTATCACACA	(TA)6	(TA)6	TA	115	130	115-130	Polymorphic													Oc_3758cR	GTTTCCTCTCATCACACACCACAATCA		yam_O_contig_1165_a	Oc_1165_aL	TA	2	12	(TA)	6	(TA)6			Oc_1165_aL	(TA)6			Oc_1165_aL	TA				Oc_1165_a	Oc_1165_aL	115
Oc_1191_aL	CAGTTTTCCCAGTCACGACAGCTTTGCAAAATGATGCTGTTTC	Oc_1191_aR	GTTTTGGGATTGATCTTCCTCACATTCT	(GCG)4	(GCG)4	GCG	150	153	150-153	Polymorphic													Oc_1833_aR	GTTTCTGCTGCAGCCTTGAGACTTATC		yam_O_contig_1191_a	Oc_1191_aL	GCG	3	12	(GCG)	4	(GCG)4			Oc_1191_aL	(GCG)4			Oc_1191_aL	GCG				Oc_1191_a	Oc_1191_aL	150
Oc_1391_aL	CAGTTTTCCCAGTCACGACATAAGGCATCATTAGCAGGACACG	Oc_1391_aR	GTTTCATAAGGTGGAGGATAACCAGCAG	(CTC)4	(CTC)4	CTC	180	180	180-180	Monomorphic													Oc_586_aR	GTTTACTGGAGATCATCCTCCTCTTCG		yam_O_contig_1391_a	Oc_1391_aL	CTC	3	12	(CTC)	4	(CTC)4			Oc_1391_aL	(CTC)4			Oc_1391_aL	CTC				Oc_1391_a	Oc_1391_aL	180
Oc_1065_aL	CAGTTTTCCCAGTCACGACTTGCAATTCAACAACAAAATTTGAA	Oc_1065_aR	GTTTATTCAGATTAGAAGAAGACCGCCC	(AAT)4	(AAT)4	AAT	163	163	163-163	Monomorphic													Oc_5440_aR	GTTTCATTGTCACAAAGGGACATTCTCA		yam_O_contig_1065_a	Oc_1065_aL	AAT	3	12	(AAT)	4	(AAT)4			Oc_1065_aL	(AAT)4			Oc_1065_aL	AAT				Oc_1065_a	Oc_1065_aL	163
OsB9_c5459_5_aL	CAGTTTTCCCAGTCACGACATGCTTCGCAGTTCGTTGGT	OsB9_c5459_5_aR	GTTTGCATCTGCCTGAAGTATGAGGAAT	(CTT)4	(CTT)4	CTT	0	0	-	Didn't Work													Os87_c937_aR	GTTTGACCACAACAAACAACAAACAACC		yam_O_singleton_B310-33_9_c5459_5_a	OsB9_c5459_5_aL	CTT	3	12	(CTT)	4	(CTT)4			OsB9_c5459_5_aL	(CTT)4			OsB9_c5459_5_aL	CTT				OsB9_c5459_5_a	OsB9_c5459_5_aL
Oc_345_aL	CAGTTTTCCCAGTCACGACGGGATGAGAAGCATCTGGAATCT	Oc_345_aR	GTTTTCTTCTCCACGAGACTCTCCACTT	(TCT)4	(TCT)4	TCT	180	186	180-186	Polymorphic													Oc_951_aR	GTTTCATTTTCGAAGCGATCGAGAGA		yam_O_contig_345_a	Oc_345_aL	TCT	3	12	(TCT)	4	(TCT)4			Oc_345_aL	(TCT)4			Oc_345_aL	TCT				Oc_345_a	Oc_345_aL	180
Oc_4418_aL	CAGTTTTCCCAGTCACGACTGATGATACCATGTAATTGTCCGC	Oc_4418_aR	GTTTAAGTAGTGGCATTGAGAGCGAATC	(TG)6	(TG)6	TG	145	149	145-149	Polymorphic													Oc_5610_aR	GTTTAGCTTGGCCATCTCTTACTCCAAT		yam_O_contig_4418_a	Oc_4418_aL	TG	2	12	(TG)	6	(TG)6			Oc_4418_aL	(TG)6			Oc_4418_aL	TG				Oc_4418_a	Oc_4418_aL	145
Oc_1889_aL	CAGTTTTCCCAGTCACGACAAATCTAAAAAGGAGAGGAGGGCG	Oc_1889_aR	GTTTATCGAAGGGGTTGCTGATCATAG	(GAA)4	(GAA)4	GAA	118	133	118-133	Polymorphic													Oc_3321_aR	GTTTTCCAGGAACAAATGGTTTGAGATT		yam_O_contig_1889_a	Oc_1889_aL	GAA	3	12	(GAA)	4	(GAA)4			Oc_1889_aL	(GAA)4			Oc_1889_aL	GAA				Oc_1889_a	Oc_1889_aL	118
Oc_6491_aL	CAGTTTTCCCAGTCACGACGAGCACCCGTAGAACACAGTATCA	Oc_6491_aR	GTTTGTTGCAATTGGAGGAGCTTTTATG	(AG)6	(AG)6	AG	173	179	173-179	Polymorphic													Oc_6254_aR	GTTTGGATTAAGGAAGGGCTGTTGAGAT		yam_O_contig_6491_a	Oc_6491_aL	AG	2	12	(AG)	6	(AG)6			Oc_6491_aL	(AG)6			Oc_6491_aL	AG				Oc_6491_a	Oc_6491_aL	173
Os87_c4013_aL	CAGTTTTCCCAGTCACGACGATCGTCCTCGCAAAGATCTCAT	Os87_c4013_aR	GTTTATCCATGACAAAGGAATCTACCGA	(CCT)4	(CCT)4	CCT	151	151	151-151	Monomorphic													Oc_446_aR	GTTTATCTTGGACTTCGACTTGGCAG		yam_O_singleton_87-01091-33_1_c4013_a	Os87_c4013_aL	CCT	3	12	(CCT)	4	(CCT)4			Os87_c4013_aL	(CCT)4			Os87_c4013_aL	CCT				Os87_c4013_a	Os87_c4013_aL	151
Oc_1958_aL	CAGTTTTCCCAGTCACGACTGATCCTATAGACATCCAACGGCT	Oc_1958_aR	GTTTGAGAACCTCGAGCGCACTGT	(TCT)4	(TCT)4	TCT	150	150	150-150	Monomorphic													Oc_5376_aR	GTTTCATCAGTGACTCCAATTTCACACC		yam_O_contig_1958_a	Oc_1958_aL	TCT	3	12	(TCT)	4	(TCT)4			Oc_1958_aL	(TCT)4			Oc_1958_aL	TCT				Oc_1958_a	Oc_1958_aL	150
Oc_6014_bL	CAGTTTTCCCAGTCACGACTCGATTTGAAAAGACTCCGATCTC	Oc_6014_bR	GTTTGCTTTCCTCTTCTCGCTTCTATCC	(GAA)4	(GAA)4	GAA	167	167	167-167	Monomorphic													Oc_1086_aR	GTTTCAATAGCATGTAGGGCGAGGAC		yam_O_contig_6014_b	Oc_6014_bL	GAA	3	12	(GAA)	4	(GAA)4			Oc_6014_bL	(GAA)4			Oc_6014_bL	GAA				Oc_6014_b	Oc_6014_bL	167
Oc_2959_bL	CAGTTTTCCCAGTCACGACTCAAAGCCTTCAAAAATATTATTCCG	Oc_2959_bR	GTTTAGCATGCTCGCTTATGTAAAGCA	(TA)6	(TA)6	TA	147	147	147-147	Monomorphic													Oc_512_aR	GTTTATAGGATTTCCATCGCTCCAAAGT		yam_O_contig_2959_b	Oc_2959_bL	TA	2	12	(TA)	6	(TA)6			Oc_2959_bL	(TA)6			Oc_2959_bL	TA				Oc_2959_b	Oc_2959_bL	147
Oc_41_aL	CAGTTTTCCCAGTCACGACGGATCGTTTGCGTGTTCGTATC	Oc_41_aR	GTTTTTGAGATCTGGTTCTTCCCCATTA	(TCG)4	(TCG)4	TCG	126	126	126-126	Monomorphic													Oc_1038_aR	GTTTACAGAAGTGACGGGGTCGATAG		yam_O_contig_41_a	Oc_41_aL	TCG	3	12	(TCG)	4	(TCG)4			Oc_41_aL	(TCG)4			Oc_41_aL	TCG				Oc_41_a	Oc_41_aL	126
Oc_5646_aL	CAGTTTTCCCAGTCACGACACTGGTTGAGTGTTTTTCTGAGGG	Oc_5646_aR	GTTTAGAGTGCTTGCCAGGACAATATCT	(TA)6	(TA)6	TA	179	179	179-179	Monomorphic													Oc_5776_bR	GTTTTCAATGCAAACAAAGAACAAGTAATCA		yam_O_contig_5646_a	Oc_5646_aL	TA	2	12	(TA)	6	(TA)6			Oc_5646_aL	(TA)6			Oc_5646_aL	TA				Oc_5646_a	Oc_5646_aL	179
Oc_6452_aL	CAGTTTTCCCAGTCACGACGATACTTTGAATCCCAAGCGTGTC	Oc_6452_aR	GTTTTCTTCGTCTCCTTGTCGAGTCTTT	(AG)6	(AG)6	AG	143	143	143-143	Monomorphic													Oc_7199_aR	GTTTCCTGATTTTTCACCTTGTTCTTGC		yam_O_contig_6452_a	Oc_6452_aL	AG	2	12	(AG)	6	(AG)6			Oc_6452_aL	(AG)6			Oc_6452_aL	AG				Oc_6452_a	Oc_6452_aL	143
Os87_c1740_aL	CAGTTTTCCCAGTCACGACATCGGAGTGGCATTCTCGTTATTA	Os87_c1740_aR	GTTTTGCTGTCATTTCTCCATAAAGTTCA	(ATA)4	(ATA)4	ATA	179	182	179-182	Polymorphic													Oc_1786_aR	GTTTCTTCGTGCTTTATCAGGATGTGG		yam_O_singleton_87-01091-33_1_c1740_a	Os87_c1740_aL	ATA	3	12	(ATA)	4	(ATA)4			Os87_c1740_aL	(ATA)4			Os87_c1740_aL	ATA				Os87_c1740_a	Os87_c1740_aL	179
Oc_5467_aL	CAGTTTTCCCAGTCACGACGAATACGAAAAGGAGAGGGAAGGA	Oc_5467_aR	GTTTCCTTCAATGAAATATTTATACGCTGCC	(TA)6	(TA)6	TA	162	166	162-166	Polymorphic													Oc_4851_bR	GTTTGACACTTCCTAAGAAGGGCTACACA		yam_O_contig_5467_a	Oc_5467_aL	TA	2	12	(TA)	6	(TA)6			Oc_5467_aL	(TA)6			Oc_5467_aL	TA				Oc_5467_a	Oc_5467_aL	162
Oc_4740_aL	CAGTTTTCCCAGTCACGACCAGGTCTGACGAGTCATGTCAACT	Oc_4740_aR	GTTTCTCACTGGATTGACAGAGCTCAAG	(TCA)4	(TCA)4	TCA	166	191	166-191	Polymorphic													Oc_898_aR	GTTTCCAATTAACACACCTTGATCACCA		yam_O_contig_4740_a	Oc_4740_aL	TCA	3	12	(TCA)	4	(TCA)4			Oc_4740_aL	(TCA)4			Oc_4740_aL	TCA				Oc_4740_a	Oc_4740_aL	166
Oc_125_bL	CAGTTTTCCCAGTCACGACGCAGCATCATTGAAAGGAAGAGAT	Oc_125_bR	GTTTTGAACCTCAATTAAAACCTCGACC	(GCA)4	(GCA)4	GCA	179	179	179-179	Monomorphic													Oc_4953_dR	GTTTAAGCAGGCTAACAGTTGGTGAAAA		yam_O_contig_125_b	Oc_125_bL	GCA	3	12	(GCA)	4	(GCA)4			Oc_125_bL	(GCA)4			Oc_125_bL	GCA				Oc_125_b	Oc_125_bL	179
Oc_3462_bL	CAGTTTTCCCAGTCACGACCAAAGTCTTGGCAGCCATTATTC	Oc_3462_bR	GTTTAATGGGAAGAAGAGTAGCCATTGT	(TGT)4	(TGT)4	TGT	317	328	317-328	Polymorphic													Oc_5519_aR	GTTTTGAAATGGAACTACAATCCTTCCAA		yam_O_contig_3462_b	Oc_3462_bL	TGT	3	12	(TGT)	4	(TGT)4			Oc_3462_bL	(TGT)4			Oc_3462_bL	TGT				Oc_3462_b	Oc_3462_bL	317
Oc_1192_aL	CAGTTTTCCCAGTCACGACGGATCTTTTCCCTTCTCTCTGGTC	Oc_1192_aR	GTTTCTCAGCTTATCACCATCACCTCCT	(GAC)4	(GAC)4	GAC	111	111	111-111	Monomorphic													Oc_5824_aR	GTTTCGGGATCTTCCCTAATCTCCTTC		yam_O_contig_1192_a	Oc_1192_aL	GAC	3	12	(GAC)	4	(GAC)4			Oc_1192_aL	(GAC)4			Oc_1192_aL	GAC				Oc_1192_a	Oc_1192_aL	111
Os87_c11482_aL	CAGTTTTCCCAGTCACGACCCCGCTCTCCTGCTAGGAAC	Os87_c11482_aR	GTTTAACATGTCTTCGAGCTGAGCAAG	(GGT)4	(GGT)4	GGT	0	0	-	Didn't Work													Oc_3199_aR	GTTTTAAAGATGTTTGGTCTCGTCTGGC		yam_O_singleton_87-01091-33_1_c11482_a	Os87_c11482_aL	GGT	3	12	(GGT)	4	(GGT)4			Os87_c11482_aL	(GGT)4			Os87_c11482_aL	GGT				Os87_c11482_a	Os87_c11482_aL
Oc_2627_aL	CAGTTTTCCCAGTCACGACCTTGATGCTGGTGTTCTGTATGTG	Oc_2627_aR	GTTTCCCTGTCATGTAGCCCAGTAATTT	(TAT)4	(TAT)4	TAT	182	184	182-184	Polymorphic													Oc_2547_aR	GTTTAACATCCAACAACCGAGCTTAAAA		yam_O_contig_2627_a	Oc_2627_aL	TAT	3	12	(TAT)	4	(TAT)4			Oc_2627_aL	(TAT)4			Oc_2627_aL	TAT				Oc_2627_a	Oc_2627_aL	182
Oc_2127_aL	CAGTTTTCCCAGTCACGACAGCCTCTGGTTGAGACTGCTTCTA	Oc_2127_aR	GTTTCCACTGCAGAGTACTACACCATGC	(TAA)4	(TAA)4	TAA	171	171	171-171	Monomorphic													Oc_2852_aR	GTTTACTGAGCTTCCCACTAGCCTACAG		yam_O_contig_2127_a	Oc_2127_aL	TAA	3	12	(TAA)	4	(TAA)4			Oc_2127_aL	(TAA)4			Oc_2127_aL	TAA				Oc_2127_a	Oc_2127_aL	171
Oc_982_aL	CAGTTTTCCCAGTCACGACCGAGAAACTTCAACCCTACTTGTC	Oc_982_aR	GTTTGTATTGGAATGATACTTGAAAGTGAGAA	(ATC)4	(ATC)4	ATC	178	178	178-178	Monomorphic													Os87_c4483_aR	GTTTCATCTTCTCCACTTCCTTCCAAAA		yam_O_contig_982_a	Oc_982_aL	ATC	3	12	(ATC)	4	(ATC)4			Oc_982_aL	(ATC)4			Oc_982_aL	ATC				Oc_982_a	Oc_982_aL	178
Oc_567_aL	CAGTTTTCCCAGTCACGACTTGGTAAGTGAGTTAGTGGGCCTT	Oc_567_aR	GTTTTGCTTTATTAATTTCCACTCAAAACAAG	(AT)6	(AT)6	AT	68	106	68-106	Polymorphic													Oc_5393_aR	GTTTAAAAACATAAAATGCAAAACAATCCTG		yam_O_contig_567_a	Oc_567_aL	AT	2	12	(AT)	6	(AT)6			Oc_567_aL	(AT)6			Oc_567_aL	AT				Oc_567_a	Oc_567_aL	68
Oc_594_aL	CAGTTTTCCCAGTCACGACAGGACCGCTGAAGGACTCAAC	Oc_594_aR	GTTTACCAACTTCCCCTCTCCTCCTT	(GGA)4	(GGA)4	GGA	0	0	-	Didn't Work													Oc_6407_aR	GTTTAAGCGTAGAGATATCCCAGTTTGG		yam_O_contig_594_a	Oc_594_aL	GGA	3	12	(GGA)	4	(GGA)4			Oc_594_aL	(GGA)4			Oc_594_aL	GGA				Oc_594_a	Oc_594_aL
Oc_594_bL	CAGTTTTCCCAGTCACGACTCTGTACCTCGTCTCCTTCAGCTC	Oc_594_bR	GTTTCCTTCTCGATCTCCGATCTCC	(CCG)4	(CCG)4	CCG	167	176	167-176	Polymorphic													Oc_5164_bR	GTTTATAATGCATGGCTTTTCCAAATCA		yam_O_contig_594_b	Oc_594_bL	CCG	3	12	(CCG)	4	(CCG)4			Oc_594_bL	(CCG)4			Oc_594_bL	CCG				Oc_594_b	Oc_594_bL	167
Oc_4714_aL	CAGTTTTCCCAGTCACGACCAAAGCTTCTGCAATTCCTTGATT	Oc_4714_aR	GTTTTTAAGGAGCCAAAAGCAATCTGAG	(CAT)4	(CAT)4	CAT	112	112	112-112	Monomorphic													Oc_6262_aR	GTTTAAGATCTTCTAGGATTGCCACCAC		yam_O_contig_4714_a	Oc_4714_aL	CAT	3	12	(CAT)	4	(CAT)4			Oc_4714_aL	(CAT)4			Oc_4714_aL	CAT				Oc_4714_a	Oc_4714_aL	112
Oc_2022_aL	CAGTTTTCCCAGTCACGACATGGTGATGCAATCTGGAATTTTT	Oc_2022_aR	GTTTTGCTGCATTCTAAGTTTGGCAATA	(TTA)4	(TTA)4	TTA	150	150	150-150	Monomorphic													Oc_718_aR	GTTTGTTACAGCATACAAAAGGCCCAAC		yam_O_contig_2022_a	Oc_2022_aL	TTA	3	12	(TTA)	4	(TTA)4			Oc_2022_aL	(TTA)4			Oc_2022_aL	TTA				Oc_2022_a	Oc_2022_aL	150
Oc_2845_aL	CAGTTTTCCCAGTCACGACAACTCGATCATCATCTGATTTCCC	Oc_2845_aR	GTTTGCATAGCTAATTTGCAGCTCTTTTTC	(TA)6	(TA)6	TA	97	102	97-102	Polymorphic													Oc_1086_aR	GTTTCAATAGCATGTAGGGCGAGGAC		yam_O_contig_2845_a	Oc_2845_aL	TA	2	12	(TA)	6	(TA)6			Oc_2845_aL	(TA)6			Oc_2845_aL	TA				Oc_2845_a	Oc_2845_aL	97
Oc_5253_aL	CAGTTTTCCCAGTCACGACAGAAGAAAGAGTCCGGAATCAAGG	Oc_5253_aR	GTTTCAACAGCTTTCTGTTCCATTCTGA	(TGT)4	(TGT)4	TGT	160	163	160-163	Polymorphic													Oc_4868_aR	GTTTGGGATAAACACCACTGGCCTTATT		yam_O_contig_5253_a	Oc_5253_aL	TGT	3	12	(TGT)	4	(TGT)4			Oc_5253_aL	(TGT)4			Oc_5253_aL	TGT				Oc_5253_a	Oc_5253_aL	160
Oc_3418_aL	CAGTTTTCCCAGTCACGACAGAGAGGAGAACGTGGAGGTTTTG	Oc_3418_aR	GTTTCAAGCTTGGTAACAGGAACCCACT	(GAG)4	(GAG)4	GAG	159	161	159-161	Polymorphic													Oc_3279_aR	GTTTGTAGCTGATCAACCACGTAACGCT		yam_O_contig_3418_a	Oc_3418_aL	GAG	3	12	(GAG)	4	(GAG)4			Oc_3418_aL	(GAG)4			Oc_3418_aL	GAG				Oc_3418_a	Oc_3418_aL	159
Oc_4657_aL	CAGTTTTCCCAGTCACGACGGAGGCAGAAATGAATCTGAGCTA	Oc_4657_aR	GTTTTGCACTTCAGTTCCAGTGCAAG	(TTG)4	(TTG)4	TTG	67	67	67-67	Monomorphic													Os87_c10801_aR	GTTTACTTTCAAGAAATGCAGGCAACTT		yam_O_contig_4657_a	Oc_4657_aL	TTG	3	12	(TTG)	4	(TTG)4			Oc_4657_aL	(TTG)4			Oc_4657_aL	TTG				Oc_4657_a	Oc_4657_aL	67
Oc_4932_aL	CAGTTTTCCCAGTCACGACCTGTACAGAGGGATCGGTATAGGG	Oc_4932_aR	GTTTTATGCTCGAAGACTGCTGAACTTG	(CAG)4	(CAG)4	CAG	163	163	163-163	Monomorphic													Oc_3451_aR	GTTTCTAATCCAAAGACGAAGCACGAAG		yam_O_contig_4932_a	Oc_4932_aL	CAG	3	12	(CAG)	4	(CAG)4			Oc_4932_aL	(CAG)4			Oc_4932_aL	CAG				Oc_4932_a	Oc_4932_aL	163
Os87_c10863_aL	CAGTTTTCCCAGTCACGACTTGAGCCAGCACAAGGTCTTATTT	Os87_c10863_aR	GTTTTGCTTTTGTTTGAATTCTCATTGC	(TA)6	(TA)6	TA	154	154	154-154	Monomorphic													Os87_lrc4485_aR	GTTTTCCCAATCAAACAAACTTCCAAAC		yam_O_singleton_87-01091-33_1_c10863_a	Os87_c10863_aL	TA	2	12	(TA)	6	(TA)6			Os87_c10863_aL	(TA)6			Os87_c10863_aL	TA				Os87_c10863_a	Os87_c10863_aL	154
Oc_2436cL	CAGTTTTCCCAGTCACGACGAGTGGGAGCACCACTTTGAGTAT	Oc_2436cR	GTTTTCTGATGGGAATTGGTACAATGTTT	(GAT)4	(GAT)4	GAT	125	126	125-126	Polymorphic													Oc_6996_aR	GTTTTATAGCAAGATGGCTGCCCTGTAT		yam_O_contig_2436_c	Oc_2436cL	GAT	3	12	(GAT)	4	(GAT)4			Oc_2436cL	(GAT)4			Oc_2436cL	GAT				Oc_2436c	Oc_2436cL	125
Oc_3705_bL	CAGTTTTCCCAGTCACGACACATCACCAGCATCAGTGTCAAGT	Oc_3705_bR	GTTTTGCTATATATCCTTGCCCCTCTGA	(CTT)4	(CTT)4	CTT	136	136	136-136	Monomorphic													Oc_1520_aR	GTTTATATTGAAATGCCATACCCACAGC		yam_O_contig_3705_b	Oc_3705_bL	CTT	3	12	(CTT)	4	(CTT)4			Oc_3705_bL	(CTT)4			Oc_3705_bL	CTT				Oc_3705_b	Oc_3705_bL	136
Oc_68_aL	CAGTTTTCCCAGTCACGACAATCTCACAAACCAAAGACCCAAA	Oc_68_aR	GTTTAGTTGAGGAAGAGGAGAAGAAGGG	(ATC)4	(ATC)4	ATC	115	115	115-115	Monomorphic																yam_O_contig_68_a	Oc_68_aL	ATC	3	12	(ATC)	4	(ATC)4			Oc_68_aL	(ATC)4			Oc_68_aL	ATC				Oc_68_a	Oc_68_aL	115
Oc_769_bL	CAGTTTTCCCAGTCACGACGGAGGTTGAAAGAGAGCTTGAGTG	Oc_769_bR	GTTTAGAACACGTGAAAGCACTCACAAA	(CT)6	(CT)6	CT	167	167	167-167	Monomorphic													Os87_c11757_aL	CAGTTTTCCCAGTCACGACGAGAAGAGAAACAGCGAACTGAGG		yam_O_contig_769_b	Oc_769_bL	CT	2	12	(CT)	6	(CT)6			Oc_769_bL	(CT)6			Oc_769_bL	CT				Oc_769_b	Oc_769_bL	167
Oc_16_aL	CAGTTTTCCCAGTCACGACCACATCATGCCATCATTCCATAGT	Oc_16_aR	GTTTTGTTTTAGACTTTGATTTCATGCCC	(TCT)4	(TCT)4	TCT	149	149	149-149	Monomorphic													Oc_1164_aL	CAGTTTTCCCAGTCACGACCACTTTTCTATCAAGCTTTCCTATGTGT		yam_O_contig_16_a	Oc_16_aL	TCT	3	12	(TCT)	4	(TCT)4			Oc_16_aL	(TCT)4			Oc_16_aL	TCT				Oc_16_a	Oc_16_aL	149
Oc_1128_aL	CAGTTTTCCCAGTCACGACGATCCTGATCGAACGGTTGAAA	Oc_1128_aR	GTTTGGTGAGTTTTCCGACTTTGGAGT	(ACC)4	(ACC)4	ACC	112	172	112-172	Polymorphic													Oc_1164_aL	CAGTTTTCCCAGTCACGACCACTTTTCTATCAAGCTTTCCTATGTGT		yam_O_contig_1128_a	Oc_1128_aL	ACC	3	12	(ACC)	4	(ACC)4			Oc_1128_aL	(ACC)4			Oc_1128_aL	ACC				Oc_1128_a	Oc_1128_aL	112
Oc_3343_aL	CAGTTTTCCCAGTCACGACCTAATGGCCAGGAAGCAAATCAG	Oc_3343_aR	GTTTTATGTGAGCCATCCCTACGGAAAT	(TGG)4	(TGG)4	TGG	171	171	171-171	Monomorphic													Os87_lrc4485_aL	CAGTTTTCCCAGTCACGACCAATGGCTGGGAAACTGATACACT		yam_O_contig_3343_a	Oc_3343_aL	TGG	3	12	(TGG)	4	(TGG)4			Oc_3343_aL	(TGG)4			Oc_3343_aL	TGG				Oc_3343_a	Oc_3343_aL	171
Oc_2186_aL	CAGTTTTCCCAGTCACGACGGTTTGCCTCACTATCTTTCTTGC	Oc_2186_aR	GTTTGATGATCGTAGTTCCCATCGAGT	(TC)6	(TC)6	TC	123	133	123-133	Polymorphic													Oc_2185_aL	CAGTTTTCCCAGTCACGACTCTCCTTATCTTTCTCATTGCCCA		yam_O_contig_2186_a	Oc_2186_aL	TC	2	12	(TC)	6	(TC)6			Oc_2186_aL	(TC)6			Oc_2186_aL	TC				Oc_2186_a	Oc_2186_aL	123
Oc_3157_aL	CAGTTTTCCCAGTCACGACTTGTTAAATTGGCACAAGAAATGC	Oc_3157_aR	GTTTCAAAAGAAACCATTTTTCGGTCAT	(TTC)4	(TTC)4	TTC	117	124	117-124	Polymorphic													Oc_1666_aL	CAGTTTTCCCAGTCACGACATTGCTCATCAGGTACGCTTTGTT		yam_O_contig_3157_a	Oc_3157_aL	TTC	3	12	(TTC)	4	(TTC)4			Oc_3157_aL	(TTC)4			Oc_3157_aL	TTC				Oc_3157_a	Oc_3157_aL	117
Oc_7240_bL	CAGTTTTCCCAGTCACGACATGGCAACAGCAGGTTTTGTTATT	Oc_7240_bR	GTTTAAAGGTCAGCTAGGGTTTGGAAAG	(TA)6	(TA)6	TA	158	160	158-160	Polymorphic													Oc_3771_aL	CAGTTTTCCCAGTCACGACTGCTACTCCCTTCACTTTTATGCC		yam_O_contig_7240_b	Oc_7240_bL	TA	2	12	(TA)	6	(TA)6			Oc_7240_bL	(TA)6			Oc_7240_bL	TA				Oc_7240_b	Oc_7240_bL	158
Oc_7240_aL	CAGTTTTCCCAGTCACGACCGCATACAAGCTCCACTCCAC	Oc_7240_aR	GTTTATAGGGATGAGGGCTGTCTGGT	(CCG)4	(CCG)4	CCG	102	102	102-102	Monomorphic													Oc_3780_bL	CAGTTTTCCCAGTCACGACTGTTCATCTTTATCCCACTCCTCC		yam_O_contig_7240_a	Oc_7240_aL	CCG	3	12	(CCG)	4	(CCG)4			Oc_7240_aL	(CCG)4			Oc_7240_aL	CCG				Oc_7240_a	Oc_7240_aL	102
Oc_2918_aL	CAGTTTTCCCAGTCACGACATGTATTTTTGCAAATGCTGGCTT	Oc_2918_aR	GTTTAAAACACAAAATTCCGGACCGTAT	(TGT)4	(TGT)4	TGT	120	127	120-127	Polymorphic													Oc_2055_bL	CAGTTTTCCCAGTCACGACTTCTTGTTGAGAAGAGATTGGACC		yam_O_contig_2918_a	Oc_2918_aL	TGT	3	12	(TGT)	4	(TGT)4			Oc_2918_aL	(TGT)4			Oc_2918_aL	TGT				Oc_2918_a	Oc_2918_aL	120
Oc_4953_aL	CAGTTTTCCCAGTCACGACCTTGCTTTTCAACCAAGCCTTCTA	Oc_4953_aR	GTTTGTAGAAGGAGAAGTCGTCGTCAGC	(CCA)4	(CCA)4	CCA	71	132	71-132	Polymorphic													Oc_1251_aL	CAGTTTTCCCAGTCACGACAATTCCCGGGATGTGCTCTC		yam_O_contig_4953_a	Oc_4953_aL	CCA	3	12	(CCA)	4	(CCA)4			Oc_4953_aL	(CCA)4			Oc_4953_aL	CCA				Oc_4953_a	Oc_4953_aL	71
OsB9_c13941_2_aL	CAGTTTTCCCAGTCACGACATATGCTGCAACCAAACTTCAACA	OsB9_c13941_2_aR	GTTTAATAATGCTCTTGTTGGCAGTGATT	(TA)6	(TA)6	TA	100	100	100-100	Monomorphic													Os87_c6490_aL	CAGTTTTCCCAGTCACGACAAGAGAACCATGGGAGCTTGTTC		yam_O_singleton_B310-33_9_c13941_2_a	OsB9_c13941_2_aL	TA	2	12	(TA)	6	(TA)6			OsB9_c13941_2_aL	(TA)6			OsB9_c13941_2_aL	TA				OsB9_c13941_2_a	OsB9_c13941_2_aL	100
Oc_1797_aL	CAGTTTTCCCAGTCACGACGAGCAAGAGAAAGAACTGCGAAAG	Oc_1797_aR	GTTTGCTCAGTGAAGGAGCTCTGAGAAT	(CAC)4	(CAC)4	CAC	173	173	173-173	Monomorphic													Oc_2055_bL	CAGTTTTCCCAGTCACGACTTCTTGTTGAGAAGAGATTGGACC		yam_O_contig_1797_a	Oc_1797_aL	CAC	3	12	(CAC)	4	(CAC)4			Oc_1797_aL	(CAC)4			Oc_1797_aL	CAC				Oc_1797_a	Oc_1797_aL	173
Oc_1681_aL	CAGTTTTCCCAGTCACGACGGCGAAGAGGTCGTCTCTATGAC	Oc_1681_aR	GTTTCTGAACAAGCGGCGCAGTAG	(CCT)4	(CCT)4	CCT	167	167	167-167	Monomorphic													Oc_6027_aL	CAGTTTTCCCAGTCACGACAATTCAACAGCCAGCTACCTCATC		yam_O_contig_1681_a	Oc_1681_aL	CCT	3	12	(CCT)	4	(CCT)4			Oc_1681_aL	(CCT)4			Oc_1681_aL	CCT				Oc_1681_a	Oc_1681_aL	167
Os87_c10429_aL	CAGTTTTCCCAGTCACGACTTGAAGGGACGTGAAATAACAAAAA	Os87_c10429_aR	GTTTATACCTCACTTGCCCAACAACATT	(CA)6	(CA)6	CA	0	0	-	Didn't Work													Oc_483_aL	CAGTTTTCCCAGTCACGACAGAACAACCCAATTCCCAGATACA		yam_O_singleton_87-01091-33_1_c10429_a	Os87_c10429_aL	CA	2	12	(CA)	6	(CA)6			Os87_c10429_aL	(CA)6			Os87_c10429_aL	CA				Os87_c10429_a	Os87_c10429_aL
Oc_3819_aL	CAGTTTTCCCAGTCACGACTTCACCCTGATCACCAAATACCTT	Oc_3819_aR	GTTTCAGGAAGAGTTATGAGGAGGCAAA	(TA)6	(TA)6	TA	177	177	177-177	Monomorphic													Oc_908_aL	CAGTTTTCCCAGTCACGACCTCCTCTTGACTCGGTATCACGTT		yam_O_contig_3819_a	Oc_3819_aL	TA	2	12	(TA)	6	(TA)6			Oc_3819_aL	(TA)6			Oc_3819_aL	TA				Oc_3819_a	Oc_3819_aL	177
OsA8_c5279_5_aL	CAGTTTTCCCAGTCACGACGCTCTCTGATGAGACATCCTCCTT	OsA8_c5279_5_aR	GTTTTTCCACTCTTCATCCAAACAAACA	(CTC)4	(CTC)4	CTC	151	151	151-151	Monomorphic													OsA8_c2962_23_aL	CAGTTTTCCCAGTCACGACTTGGTAAAACTTAAAGCTGGAGATG		yam_O_singleton_A328-33_8_c5279_5_a	OsA8_c5279_5_aL	CTC	3	12	(CTC)	4	(CTC)4			OsA8_c5279_5_aL	(CTC)4			OsA8_c5279_5_aL	CTC				OsA8_c5279_5_a	OsA8_c5279_5_aL	151
Oc_5879_aL	CAGTTTTCCCAGTCACGACTCAACACATCTCTTGCTTGATGAAC	Oc_5879_aR	GTTTAAAACTTTCCAAAATTGAAGGCTG	(TG)6	(TG)6	TG	142	149	142-149	Polymorphic													Oc_2804_aL	CAGTTTTCCCAGTCACGACAGGCCTGATGAAGATGAAGGTATG		yam_O_contig_5879_a	Oc_5879_aL	TG	2	12	(TG)	6	(TG)6			Oc_5879_aL	(TG)6			Oc_5879_aL	TG				Oc_5879_a	Oc_5879_aL	142
Oc_5561_bL	CAGTTTTCCCAGTCACGACCAGCATCACACTGAGCCATCTATT	Oc_5561_bR	GTTTTGTTGTCCCATTTTGCCTTTAGAT	(AGT)4	(AGT)4	AGT	116	127	116-127	Polymorphic													Oc_6128_aL	CAGTTTTCCCAGTCACGACCTGCTGAGAAGTCTCCAAGGAAGT		yam_O_contig_5561_b	Oc_5561_bL	AGT	3	12	(AGT)	4	(AGT)4			Oc_5561_bL	(AGT)4			Oc_5561_bL	AGT				Oc_5561_b	Oc_5561_bL	116
Oc_5771_aL	CAGTTTTCCCAGTCACGACCCATGGATCTCAATGGAGAAAGAC	Oc_5771_aR	GTTTGAACAAGTATCAGTGTTTATTGCCCA	(TA)6	(TA)6	TA	170	175	170-175	Polymorphic													Oc_4918_aL	CAGTTTTCCCAGTCACGACATCATGGTCAGTGATGCCATTTC		yam_O_contig_5771_a	Oc_5771_aL	TA	2	12	(TA)	6	(TA)6			Oc_5771_aL	(TA)6			Oc_5771_aL	TA				Oc_5771_a	Oc_5771_aL	170
Oc_5813_aL	CAGTTTTCCCAGTCACGACTTTACAAGGACCTGGCACTCTCTC	Oc_5813_aR	GTTTTGTTAGTGTCTTTGAAGTCCTGGATG	(TC)6	(TC)6	TC	143	147	143-147	Polymorphic													Oc_7219_aL	CAGTTTTCCCAGTCACGACGTGATCGTCTTTTCATCGACTGG		yam_O_contig_5813_a	Oc_5813_aL	TC	2	12	(TC)	6	(TC)6			Oc_5813_aL	(TC)6			Oc_5813_aL	TC				Oc_5813_a	Oc_5813_aL	143
Oc_1165_aL	CAGTTTTCCCAGTCACGACAGTTTTGGTTGGCATTTGAAGAAG	Oc_1165_aR	GTTTAAACCAACTCAAAAGCTTATCACACA	(TA)6	(TA)6	TA	115	130	115-130	Polymorphic													OsB9_c3043_10_aL	CAGTTTTCCCAGTCACGACCTGGGTTTTCTCTTGAAGGATTGA		yam_O_contig_1165_a	Oc_1165_aL	TA	2	12	(TA)	6	(TA)6			Oc_1165_aL	(TA)6			Oc_1165_aL	TA				Oc_1165_a	Oc_1165_aL	115
Oc_5905_aL	CAGTTTTCCCAGTCACGACTAAAGAGAAGGTCTACCACCACCG	Oc_5905_aR	GTTTTGGGACCTGAAGGACCTTGTAGTA	(CGA)4	(CGA)4	CGA	114	120	114-120	Polymorphic													Oc_2949_aL	CAGTTTTCCCAGTCACGACATTCATACTCACACGCCACACACT		yam_O_contig_5905_a	Oc_5905_aL	CGA	3	12	(CGA)	4	(CGA)4			Oc_5905_aL	(CGA)4			Oc_5905_aL	CGA				Oc_5905_a	Oc_5905_aL	114
Oc_558_aL	CAGTTTTCCCAGTCACGACACACCTCTTGCTGCTTCAGAAGTT	Oc_558_aR	GTTTAGTTTGCACCAAAGAAACACCAAT	(TGC)4	(TGC)4	TGC	136	136	136-136	Monomorphic													Oc_727_aL	CAGTTTTCCCAGTCACGACCCCCATGTGTTTTTCTAGATCAGG		yam_O_contig_558_a	Oc_558_aL	TGC	3	12	(TGC)	4	(TGC)4			Oc_558_aL	(TGC)4			Oc_558_aL	TGC				Oc_558_a	Oc_558_aL	136
Oc_2130_aL	CAGTTTTCCCAGTCACGACCTCCTTCTCACCCTCCTCTTCTTC	Oc_2130_aR	GTTTAAAGATGAAGCCACGAGAGATCC	(GCT)4	(GCT)4	GCT	164	164	164-164	Monomorphic													Os87_lrc4450_aL	CAGTTTTCCCAGTCACGACTTTCTGACTGATCAAGCCCTTTTC		yam_O_contig_2130_a	Oc_2130_aL	GCT	3	12	(GCT)	4	(GCT)4			Oc_2130_aL	(GCT)4			Oc_2130_aL	GCT				Oc_2130_a	Oc_2130_aL	164
Oc_3309_aL	CAGTTTTCCCAGTCACGACCATAACCCTGATAGAGGATGGCAG	Oc_3309_aR	GTTTTGTGTAGAGTGGAAGAAGGGGTTT	(CTT)4	(CTT)4	CTT	170	170	170-170	Monomorphic													Oc_2868_aL	CAGTTTTCCCAGTCACGACTCTCGCAAACGCATTAATCTGATA		yam_O_contig_3309_a	Oc_3309_aL	CTT	3	12	(CTT)	4	(CTT)4			Oc_3309_aL	(CTT)4			Oc_3309_aL	CTT				Oc_3309_a	Oc_3309_aL	170
Oc_5632_aL	CAGTTTTCCCAGTCACGACATCTCCACCGTCCATCTCCAC	Oc_5632_aR	GTTTAGAGCAAGCTTCAGGGGAGG	(CCT)4	(CCT)4	CCT	97	105	97-105	Polymorphic													Oc_1923_bL	CAGTTTTCCCAGTCACGACTCCGACAACGAATGCCTCTATACT		yam_O_contig_5632_a	Oc_5632_aL	CCT	3	12	(CCT)	4	(CCT)4			Oc_5632_aL	(CCT)4			Oc_5632_aL	CCT				Oc_5632_a	Oc_5632_aL	97
Oc_1099_aL	CAGTTTTCCCAGTCACGACGATAGGAGGCCACTGATTCAAGAG	Oc_1099_aR	GTTTACTAGCGAAGTGCATCCCTACAAC	(ATC)4	(ATC)4	ATC	175	178	175-178	Polymorphic													Oc_1893_aL	CAGTTTTCCCAGTCACGACATCCGTTTCCGTTTTCGGATT		yam_O_contig_1099_a	Oc_1099_aL	ATC	3	12	(ATC)	4	(ATC)4			Oc_1099_aL	(ATC)4			Oc_1099_aL	ATC				Oc_1099_a	Oc_1099_aL	175
Oc_5882_aL	CAGTTTTCCCAGTCACGACGCCTGATCCATCAGCCAAATATAA	Oc_5882_aR	GTTTGTTTTGCTGTGAGACAATCAATCG	(TA)6	(TA)6	TA	166	166	166-166	Monomorphic													Oc_1854_aL	CAGTTTTCCCAGTCACGACGAACAATGCTTCGAGGAATAGGAA		yam_O_contig_5882_a	Oc_5882_aL	TA	2	12	(TA)	6	(TA)6			Oc_5882_aL	(TA)6			Oc_5882_aL	TA				Oc_5882_a	Oc_5882_aL	166
Oc_6893_aL	CAGTTTTCCCAGTCACGACTGTGCGACACATCAGATCAGTAAA	Oc_6893_aR	GTTTAGATGAGATTGATGCAGTGTCCTG	(AT)6	(AT)6	AT	149	151	149-151	Polymorphic													Oc_2863_bL	CAGTTTTCCCAGTCACGACTCTTCATCTTTTTCTTCTGTTAGGTGC		yam_O_contig_6893_a	Oc_6893_aL	AT	2	12	(AT)	6	(AT)6			Oc_6893_aL	(AT)6			Oc_6893_aL	AT				Oc_6893_a	Oc_6893_aL	149
Oc_823_aL	CAGTTTTCCCAGTCACGACCAGAATCTGAAACATGCCACACTC	Oc_823_aR	GTTTCAACTGAAATCATGGCAATTTGAA	(ATC)4	(ATC)4	ATC	165	176	165-176	Polymorphic													OsA8_c9740_2_aL	CAGTTTTCCCAGTCACGACAGACCAAGGCTAAGGAAATCCAAG		yam_O_contig_823_a	Oc_823_aL	ATC	3	12	(ATC)	4	(ATC)4			Oc_823_aL	(ATC)4			Oc_823_aL	ATC				Oc_823_a	Oc_823_aL	165
Oc_3461_aL	CAGTTTTCCCAGTCACGACTCATTTTCTACATCCCGGTAAAGC	Oc_3461_aR	GTTTAACCCCTGACGAAGAAATTTAACC	(TA)6	(TA)6	TA	113	117	113-117	Polymorphic													Oc_6261_bL	CAGTTTTCCCAGTCACGACATCAGGGGTAGATTGGGAAGACTC		yam_O_contig_3461_a	Oc_3461_aL	TA	2	12	(TA)	6	(TA)6			Oc_3461_aL	(TA)6			Oc_3461_aL	TA				Oc_3461_a	Oc_3461_aL	113
Oc_5780_aL	CAGTTTTCCCAGTCACGACGCACTGGATCTGGTAGGATATTGC	Oc_5780_aR	GTTTAACATCATATGAAGGTTGGTGTTGAA	(GAT)4	(GAT)4	GAT	135	138	135-138	Polymorphic													Oc_4411_aL	CAGTTTTCCCAGTCACGACAACCCTAACCCTAGTTTCGGTGAA		yam_O_contig_5780_a	Oc_5780_aL	GAT	3	12	(GAT)	4	(GAT)4			Oc_5780_aL	(GAT)4			Oc_5780_aL	GAT				Oc_5780_a	Oc_5780_aL	135
Oc_1751_aL	CAGTTTTCCCAGTCACGACGGCCCTTGAGATCTCTCTTCTCTC	Oc_1751_aR	GTTTTGAATCGAAATGCACTCTCTCATC	(CTC)4	(CTC)4	CTC	112	112	112-112	Monomorphic													Oc_4347_aL	CAGTTTTCCCAGTCACGACCTGCTATCACTGACAAGAAGGCAC		yam_O_contig_1751_a	Oc_1751_aL	CTC	3	12	(CTC)	4	(CTC)4			Oc_1751_aL	(CTC)4			Oc_1751_aL	CTC				Oc_1751_a	Oc_1751_aL	112
Oc_4873_aL	CAGTTTTCCCAGTCACGACTGGAGTGTTAGCAAGTAAGGTGGA	Oc_4873_aR	GTTTATTCCATGCAACAATACAGCAAAA	(AT)6	(AT)6	AT	118	143	118-143	Polymorphic													Os87_lrc7943_aL	CAGTTTTCCCAGTCACGACCATGTTAGCTTTGGCTTTGATGTG		yam_O_contig_4873_a	Oc_4873_aL	AT	2	12	(AT)	6	(AT)6			Oc_4873_aL	(AT)6			Oc_4873_aL	AT				Oc_4873_a	Oc_4873_aL	118
Os87_lrc4003_aL	CAGTTTTCCCAGTCACGACCCTTCCTCCGCTCTCACCTC	Os87_lrc4003_aR	GTTTAGTCGATTTAGGGTTAGGATTGGG	(CCG)4	(CCG)4	CCG	174	177	174-177	Polymorphic													Os87_lrc6408_aL	CAGTTTTCCCAGTCACGACAGGTGAAAGTTGGAGAGGTTTGTG		yam_O_singleton_87-01091-33_1_lrc4003_a	Os87_lrc4003_aL	CCG	3	12	(CCG)	4	(CCG)4			Os87_lrc4003_aL	(CCG)4			Os87_lrc4003_aL	CCG				Os87_lrc4003_a	Os87_lrc4003_aL	174
Os87_lrc4003_aL	CAGTTTTCCCAGTCACGACCCTTCCTCCGCTCTCACCTC	Os87_lrc4003_aR	GTTTAGTCGATTTAGGGTTAGGATTGGG	(CCG)4	(CCG)4	CCG	174	177	174-177	Polymorphic													Oc_1799_aL	CAGTTTTCCCAGTCACGACAAAATCAGCTAAGGCAGTGTCTTTATTC		yam_O_singleton_87-01091-33_1_lrc4003_a	Os87_lrc4003_aL	CCG	3	12	(CCG)	4	(CCG)4			Os87_lrc4003_aL	(CCG)4			Os87_lrc4003_aL	CCG				Os87_lrc4003_a	Os87_lrc4003_aL	174
Oc_2578_aL	CAGTTTTCCCAGTCACGACTGTTGTTGGGCTTGTGAATTTATG	Oc_2578_aR	GTTTTCCCTTTCTCTTGTTCTGTTTCCA	(AT)6	(AT)6	AT	173	173	173-173	Monomorphic													Os87_lrc3745_aL	CAGTTTTCCCAGTCACGACTATTATCGAGAACAAAGGCCTGGA		yam_O_contig_2578_a	Oc_2578_aL	AT	2	12	(AT)	6	(AT)6			Oc_2578_aL	(AT)6			Oc_2578_aL	AT				Oc_2578_a	Oc_2578_aL	173
Oc_5302_aL	CAGTTTTCCCAGTCACGACCACCTGTGGCAAGTGAAATAATCA	Oc_5302_aR	GTTTCTAACTCCCTGCCATACAGGACAC	(TG)6	(TG)6	TG	172	173	172-173	Polymorphic													Os87_lrc5487_aL	CAGTTTTCCCAGTCACGACGAGTGTTTTGACGAAATGGTCGAT		yam_O_contig_5302_a	Oc_5302_aL	TG	2	12	(TG)	6	(TG)6			Oc_5302_aL	(TG)6			Oc_5302_aL	TG				Oc_5302_a	Oc_5302_aL	172
Oc_5408_aL	CAGTTTTCCCAGTCACGACCTCTACTCCATGGCGAGCTCTT	Oc_5408_aR	GTTTAGGATCTTGTTAGGGTTCCCAGAG	(GCG)4	(GCG)4	GCG	114	114	114-114	Monomorphic													Oc_304_aL	CAGTTTTCCCAGTCACGACGAGGAGGCATGAATTGTAAACCAG		yam_O_contig_5408_a	Oc_5408_aL	GCG	3	12	(GCG)	4	(GCG)4			Oc_5408_aL	(GCG)4			Oc_5408_aL	GCG				Oc_5408_a	Oc_5408_aL	114
Oc_5382_aL	CAGTTTTCCCAGTCACGACGGATCGCAACCCTTCTGGTC	Oc_5382_aR	GTTTAGCCTCTTTGGCAAAATAACGAAC	(CGA)4	(CGA)4	CGA	0	0	-	Didn't Work													Oc_5888_aL	CAGTTTTCCCAGTCACGACGAAATGATGGTGAAATAAGGCTCAA		yam_O_contig_5382_a	Oc_5382_aL	CGA	3	12	(CGA)	4	(CGA)4			Oc_5382_aL	(CGA)4			Oc_5382_aL	CGA				Oc_5382_a	Oc_5382_aL
Oc_362_aL	CAGTTTTCCCAGTCACGACGAAAGCGCTTCAATCATTCCTTT	Oc_362_aR	GTTTTGTCGATCTTGACAACCTCATCAT	(AAG)4	(AAG)4	AAG	254	254	254-254	Monomorphic													Oc_3776_aL	CAGTTTTCCCAGTCACGACAATTCCCGGGACTCAGCAAG		yam_O_contig_362_a	Oc_362_aL	AAG	3	12	(AAG)	4	(AAG)4			Oc_362_aL	(AAG)4			Oc_362_aL	AAG				Oc_362_a	Oc_362_aL	254
Oc_6258_aL	CAGTTTTCCCAGTCACGACAAGGACTCCCACCATCAGGTC	Oc_6258_aR	GTTTGTGGTGGTATTGGAGCAGTGATT	(CCA)4	(CCA)4	CCA	167	167	167-167	Monomorphic													Oc_5569_aL	CAGTTTTCCCAGTCACGACCGTCCGTTTTGTATCATCATCGT		yam_O_contig_6258_a	Oc_6258_aL	CCA	3	12	(CCA)	4	(CCA)4			Oc_6258_aL	(CCA)4			Oc_6258_aL	CCA				Oc_6258_a	Oc_6258_aL	167
Oc_6971_aL	CAGTTTTCCCAGTCACGACCTCCACCGTAATAATCATTTCCCC	Oc_6971_aR	GTTTGAACCGAAGATCTGGTGGTGG	(CCG)4	(CCG)4	CCG	0	0	-	Didn't Work													Oc_6095_aL	CAGTTTTCCCAGTCACGACTTCCCCTTCTATGTCAGAAAACACA		yam_O_contig_6971_a	Oc_6971_aL	CCG	3	12	(CCG)	4	(CCG)4			Oc_6971_aL	(CCG)4			Oc_6971_aL	CCG				Oc_6971_a	Oc_6971_aL
Oc_2434_aL	CAGTTTTCCCAGTCACGACTAAAGAGAAAGGCAGAAGCATTGG	Oc_2434_aR	GTTTCGTCAACAACAGGTGGTTCATTT	(CAG)4	(CAG)4	CAG	428	428	428-428	Monomorphic													OsB9_c11806_4_aL	CAGTTTTCCCAGTCACGACCCTGGTCTTCTACGTCACCTTCTC		yam_O_contig_2434_a	Oc_2434_aL	CAG	3	12	(CAG)	4	(CAG)4			Oc_2434_aL	(CAG)4			Oc_2434_aL	CAG				Oc_2434_a	Oc_2434_aL	428
Os87_c7861_aL	CAGTTTTCCCAGTCACGACATAGCTTTGGATTAGTGCATTGCC	Os87_c7861_aR	GTTTTCCGAAAGCTCTCCACTATCTTCA	(CGT)4	(CGT)4	CGT	153	162	153-162	Polymorphic													Os87_c3563_aL	CAGTTTTCCCAGTCACGACGATTCCTTCCTTCCATTCCAAGTC		yam_O_singleton_87-01091-33_1_c7861_a	Os87_c7861_aL	CGT	3	12	(CGT)	4	(CGT)4			Os87_c7861_aL	(CGT)4			Os87_c7861_aL	CGT				Os87_c7861_a	Os87_c7861_aL	153
Oc_6249cL	CAGTTTTCCCAGTCACGACTTGTGATGAAGAGTTTGAGGGAGA	Oc_6249cR	GTTTCCAACTGGAATCATACATCCCTCT	(AGA)4	(AGA)4	AGA	130	130	130-130	Monomorphic													Oc_5017_aL	CAGTTTTCCCAGTCACGACGCAAAACCCTCCTGTCCTCAA		yam_O_contig_6249_c	Oc_6249cL	AGA	3	12	(AGA)	4	(AGA)4			Oc_6249cL	(AGA)4			Oc_6249cL	AGA				Oc_6249c	Oc_6249cL	130
Oc_2675_aL	CAGTTTTCCCAGTCACGACCTGAGAGCAATCCCAAGACCATT	Oc_2675_aR	GTTTAAACGCGAACAACAATGGATAGAT	(GC)6	(GC)6	GC	98	102	98-102	Polymorphic													Oc_5405_bL	CAGTTTTCCCAGTCACGACACCTTTACACACCGGAAACACACT		yam_O_contig_2675_a	Oc_2675_aL	GC	2	12	(GC)	6	(GC)6			Oc_2675_aL	(GC)6			Oc_2675_aL	GC				Oc_2675_a	Oc_2675_aL	98
Oc_1562_aL	CAGTTTTCCCAGTCACGACTGACCAGAACCCACTCAGTGTTTA	Oc_1562_aR	GTTTGTCACCTCAGCAATGCACATCTT	(GAG)4	(GAG)4	GAG	104	104	104-104	Monomorphic													Os87_c3307_aL	CAGTTTTCCCAGTCACGACCCTCTTTCTCTCCAAACCATCAAA		yam_O_contig_1562_a	Oc_1562_aL	GAG	3	12	(GAG)	4	(GAG)4			Oc_1562_aL	(GAG)4			Oc_1562_aL	GAG				Oc_1562_a	Oc_1562_aL	104
Oc_1065_aL	CAGTTTTCCCAGTCACGACTTGCAATTCAACAACAAAATTTGAA	Oc_1065_aR	GTTTATTCAGATTAGAAGAAGACCGCCC	(AAT)4	(AAT)4	AAT	163	163	163-163	Monomorphic													Os87_c11757_aR	GTTTCTCTTGCAAGGACTCTGATGATGA		yam_O_contig_1065_a	Oc_1065_aL	AAT	3	12	(AAT)	4	(AAT)4			Oc_1065_aL	(AAT)4			Oc_1065_aL	AAT				Oc_1065_a	Oc_1065_aL	163
Oc_31_aL	CAGTTTTCCCAGTCACGACGGATCACACACTCACACAACACAA	Oc_31_aR	GTTTTTGATGCCATCTCTGAGACTCACT	(AAG)4	(AAG)4	AAG	110	110	110-110	Monomorphic													Oc_1164_aR	GTTTGCCATACATCGGATTCAAATAACA		yam_O_contig_31_a	Oc_31_aL	AAG	3	12	(AAG)	4	(AAG)4			Oc_31_aL	(AAG)4			Oc_31_aL	AAG				Oc_31_a	Oc_31_aL	110
Oc_1075_aL	CAGTTTTCCCAGTCACGACCCTCCTCTTCCTCTTCCACTTCTC	Oc_1075_aR	GTTTGGAGAGATCCTTTGGGAAGAGATT	(CCT)4	(CCT)4	CCT	79	168	79-168	Polymorphic													Oc_1164_aR	GTTTGCCATACATCGGATTCAAATAACA		yam_O_contig_1075_a	Oc_1075_aL	CCT	3	12	(CCT)	4	(CCT)4			Oc_1075_aL	(CCT)4			Oc_1075_aL	CCT				Oc_1075_a	Oc_1075_aL	79
Oc_5289_aL	CAGTTTTCCCAGTCACGACAGACTTCATGTACCCTACCAGTGGA	Oc_5289_aR	GTTTCGGACAAACAAAGACCTCCTTAAA	(ATA)4	(ATA)4	ATA	133	133	133-133	Monomorphic													Os87_lrc4485_aR	GTTTTCCCAATCAAACAAACTTCCAAAC		yam_O_contig_5289_a	Oc_5289_aL	ATA	3	12	(ATA)	4	(ATA)4			Oc_5289_aL	(ATA)4			Oc_5289_aL	ATA				Oc_5289_a	Oc_5289_aL	133
Oc_5499_aL	CAGTTTTCCCAGTCACGACATTCCCTCGTTCCTTCATCTCTCT	Oc_5499_aR	GTTTGAATCGAGATCGAACTCCTCTTCA	(CTC)4	(CTC)4	CTC	175	175	175-175	Monomorphic													Oc_2185_aR	GTTTCCTGAGAGGTCTTGGAGAGAAGTG		yam_O_contig_5499_a	Oc_5499_aL	CTC	3	12	(CTC)	4	(CTC)4			Oc_5499_aL	(CTC)4			Oc_5499_aL	CTC				Oc_5499_a	Oc_5499_aL	175
Oc_5499_bL	CAGTTTTCCCAGTCACGACTCTGTGCGTGTGTCTCTTTCTCTT	Oc_5499_bR	GTTTCAAATCTCAAAGCACAACATCCAG	(TGT)4	(TGT)4	TGT	160	160	160-160	Monomorphic													Oc_1666_aR	GTTTACCTTCTTGGCATCTCTGCTCTT		yam_O_contig_5499_b	Oc_5499_bL	TGT	3	12	(TGT)	4	(TGT)4			Oc_5499_bL	(TGT)4			Oc_5499_bL	TGT				Oc_5499_b	Oc_5499_bL	160
Oc_7353_aL	CAGTTTTCCCAGTCACGACTGTGGCCAAATCCTCTCAAATACT	Oc_7353_aR	GTTTCCCTCGTCATCTTCATCTTCATCT	(TGA)4	(TGA)4	TGA	0	0	-	Didn't Work													Oc_3771_aR	GTTTTCTTCTCTTCCTTTATTCCTTCTCTCTG		yam_O_contig_7353_a	Oc_7353_aL	TGA	3	12	(TGA)	4	(TGA)4			Oc_7353_aL	(TGA)4			Oc_7353_aL	TGA				Oc_7353_a	Oc_7353_aL
Os87_c8742_aL	CAGTTTTCCCAGTCACGACGGGATATCACACCACCATGAGTCT	Os87_c8742_aR	GTTTTAAAAAGCTTGGATCCTCCTCCTG	(GCC)4	(GCC)4	GCC	263	266	263-266	Polymorphic													Oc_3780_bR	GTTTGGATTCCATAGCTGGTCAAGAAGA		yam_O_singleton_87-01091-33_1_c8742_a	Os87_c8742_aL	GCC	3	12	(GCC)	4	(GCC)4			Os87_c8742_aL	(GCC)4			Os87_c8742_aL	GCC				Os87_c8742_a	Os87_c8742_aL	263
Oc_890_aL	CAGTTTTCCCAGTCACGACGGTTGCTGAGAGTCACAAATCAAA	Oc_890_aR	GTTTTGAGATTAAGACAACGGGTATGGC	(GAA)4	(GAA)4	GAA	0	0	-	Didn't Work													Oc_2055_bR	GTTTAAAGTGTGTACAAATACAAATGACAACA		yam_O_contig_890_a	Oc_890_aL	GAA	3	12	(GAA)	4	(GAA)4			Oc_890_aL	(GAA)4			Oc_890_aL	GAA				Oc_890_a	Oc_890_aL
Oc_6210_bL	CAGTTTTCCCAGTCACGACTTTAATTTCCAACAAATTGCCACC	Oc_6210_bR	GTTTAATGCTTGATTTCTGTTGGCTTGT	(ATG)4	(ATG)4	ATG	171	171	171-171	Monomorphic													Oc_1251_aR	GTTTCGTGACCTGGCAAGTAGTATCCC		yam_O_contig_6210_b	Oc_6210_bL	ATG	3	12	(ATG)	4	(ATG)4			Oc_6210_bL	(ATG)4			Oc_6210_bL	ATG				Oc_6210_b	Oc_6210_bL	171
Oc_1408_aL	CAGTTTTCCCAGTCACGACAACAGACCAAGTTGGATAGCAAGG	Oc_1408_aR	GTTTCTTATCAAAATCATCACCAAGCCC	(TGA)4	(TGA)4	TGA	368	368	368-368	Monomorphic													Os87_c6490_aR	GTTTCTATAGCAATCGGGGAATTCAGG		yam_O_contig_1408_a	Oc_1408_aL	TGA	3	12	(TGA)	4	(TGA)4			Oc_1408_aL	(TGA)4			Oc_1408_aL	TGA				Oc_1408_a	Oc_1408_aL	368
Oc_376_aL	CAGTTTTCCCAGTCACGACTCAAGATCGATGAGTTTTGAGCTG	Oc_376_aR	GTTTAATTTGAGGCTATCATTCATGGCT	(ATG)4	(ATG)4	ATG	156	156	156-156	Monomorphic													Oc_2055_bR	GTTTAAAGTGTGTACAAATACAAATGACAACA		yam_O_contig_376_a	Oc_376_aL	ATG	3	12	(ATG)	4	(ATG)4			Oc_376_aL	(ATG)4			Oc_376_aL	ATG				Oc_376_a	Oc_376_aL	156
Oc_822_aL	CAGTTTTCCCAGTCACGACATCTCATCGACTATGTCTCCTCCG	Oc_822_aR	GTTTCGGAACATCTTACTGCGACTTCTT	(GAA)4	(GAA)4	GAA	157	157	157-157	Monomorphic													Oc_6027_aR	GTTTCAACATCATGGAAATCCAACAAGA		yam_O_contig_822_a	Oc_822_aL	GAA	3	12	(GAA)	4	(GAA)4			Oc_822_aL	(GAA)4			Oc_822_aL	GAA				Oc_822_a	Oc_822_aL	157
Oc_3001_aL	CAGTTTTCCCAGTCACGACGGGATCGATTGAGAGCGAGAT	Oc_3001_aR	GTTTATCTTGATGTCCTCCGAGATGC	(GAT)4	(GAT)4	GAT	171	171	171-171	Monomorphic													Oc_483_aR	GTTTGAGAAAGCAACGGCAAAGAAGAG		yam_O_contig_3001_a	Oc_3001_aL	GAT	3	12	(GAT)	4	(GAT)4			Oc_3001_aL	(GAT)4			Oc_3001_aL	GAT				Oc_3001_a	Oc_3001_aL	171
Oc_4139_aL	CAGTTTTCCCAGTCACGACCGGCCTCTTCCTCTTCTTCCT	Oc_4139_aR	GTTTTGTTAACTATGATATCCGGCACCC	(TCT)4	(TCT)4	TCT	257	261	257-261	Polymorphic													Oc_908_aR	GTTTAAACCCGACTAATTACATGTGTGGA		yam_O_contig_4139_a	Oc_4139_aL	TCT	3	12	(TCT)	4	(TCT)4			Oc_4139_aL	(TCT)4			Oc_4139_aL	TCT				Oc_4139_a	Oc_4139_aL	257
Oc_4621_aL	CAGTTTTCCCAGTCACGACTACTATAAAGCTGTTGCCTGCCGT	Oc_4621_aR	GTTTATGGAATTGACTTGAGAGGATTCG	(TGA)4	(TGA)4	TGA	177	177	177-177	Monomorphic													OsA8_c2962_23_aR	GTTTTCAGCAAAAACCATCTATTCATTG		yam_O_contig_4621_a	Oc_4621_aL	TGA	3	12	(TGA)	4	(TGA)4			Oc_4621_aL	(TGA)4			Oc_4621_aL	TGA				Oc_4621_a	Oc_4621_aL	177
Oc_3237_aL	CAGTTTTCCCAGTCACGACTCCTTCTTTCCTCTTTTCACTCACA	Oc_3237_aR	GTTTTCCCTCTTCTTGTTCTTCTTTCTCA	(ATG)4	(ATG)4	ATG	168	168	168-168	Monomorphic													Oc_2804_aR	GTTTAAAAAGACAACCAGACAGAAGACAGA		yam_O_contig_3237_a	Oc_3237_aL	ATG	3	12	(ATG)	4	(ATG)4			Oc_3237_aL	(ATG)4			Oc_3237_aL	ATG				Oc_3237_a	Oc_3237_aL	168
Oc_987_bL	CAGTTTTCCCAGTCACGACGAAACAAAAGTAACACAGCACAGCA	Oc_987_bR	GTTTGATGCTGCTTAGGGTTCTTCTTCA	(ACA)4	(ACA)4	ACA	129	145	129-145	Polymorphic													Oc_6128_aR	GTTTTCATTCCACCATGACATCTTCAGT		yam_O_contig_987_b	Oc_987_bL	ACA	3	12	(ACA)	4	(ACA)4			Oc_987_bL	(ACA)4			Oc_987_bL	ACA				Oc_987_b	Oc_987_bL	129
Oc_1240_aL	CAGTTTTCCCAGTCACGACGATCTTCGATCTCTCACAACCGTC	Oc_1240_aR	GTTTGTATGCTCGGATCCCTCCTCTC	(GGA)4	(GGA)4	GGA	134	134	134-134	Monomorphic													Oc_4918_aR	GTTTTGCCATTTCTTCTAGACAAGGAGG		yam_O_contig_1240_a	Oc_1240_aL	GGA	3	12	(GGA)	4	(GGA)4			Oc_1240_aL	(GGA)4			Oc_1240_aL	GGA				Oc_1240_a	Oc_1240_aL	134
Os87_lrc10167_aL	CAGTTTTCCCAGTCACGACCGACACCTTTTTGTTTGTTCGAGT	Os87_lrc10167_aR	GTTTGTCAACCAAAGCTTTTCCCAAGT	(TGA)4	(TGA)4	TGA	124	127	124-127	Polymorphic													Oc_7219_aR	GTTTATAGCTCCATGGGGACAAGGAT		yam_O_singleton_87-01091-33_1_lrc10167_a	Os87_lrc10167_aL	TGA	3	12	(TGA)	4	(TGA)4			Os87_lrc10167_aL	(TGA)4			Os87_lrc10167_aL	TGA				Os87_lrc10167_a	Os87_lrc10167_aL	124
Oc_3369_aL	CAGTTTTCCCAGTCACGACTAATTCCAGCACTGAAACTGCAAG	Oc_3369_aR	GTTTTAGCACTCTTTCTTTGGGGTTTTG	(GCT)4	(GCT)4	GCT	126	139	126-139	Polymorphic													OsB9_c3043_10_aR	GTTTCCAAAGTTATCACCTTTCTGGAACTT		yam_O_contig_3369_a	Oc_3369_aL	GCT	3	12	(GCT)	4	(GCT)4			Oc_3369_aL	(GCT)4			Oc_3369_aL	GCT				Oc_3369_a	Oc_3369_aL	126
Oc_5893_aL	CAGTTTTCCCAGTCACGACATCTTACCCTCTGTGTGGAGAAGC	Oc_5893_aR	GTTTTCATACACATGACAACAATGACGG	(ATT)4	(ATT)4	ATT	173	179	173-179	Polymorphic													Oc_2949_aR	GTTTGTGGAAAGTTCTGGAACGAAATTG		yam_O_contig_5893_a	Oc_5893_aL	ATT	3	12	(ATT)	4	(ATT)4			Oc_5893_aL	(ATT)4			Oc_5893_aL	ATT				Oc_5893_a	Oc_5893_aL	173
Oc_459_bL	CAGTTTTCCCAGTCACGACTTAATTGTGCACTTTGGGATTTGA	Oc_459_bR	GTTTAAACAAACTCCGAACTTACAAGCAG	(TA)6	(TA)6	TA	121	121	121-121	Monomorphic													Oc_727_aR	GTTTACAAGTGAAATTCCAAACCAGAGG		yam_O_contig_459_b	Oc_459_bL	TA	2	12	(TA)	6	(TA)6			Oc_459_bL	(TA)6			Oc_459_bL	TA				Oc_459_b	Oc_459_bL	121
Oc_348_aL	CAGTTTTCCCAGTCACGACGGTAATGGAGGAGGAGATGGAGTC	Oc_348_aR	GTTTCTTCCCAACTTTCTTCACTTCCAA	(AGG)4	(AGG)4	AGG	143	143	143-143	Monomorphic													Os87_lrc4450_aR	GTTTGGTCTCTTCTCCAGCTCTGTTGTG		yam_O_contig_348_a	Oc_348_aL	AGG	3	12	(AGG)	4	(AGG)4			Oc_348_aL	(AGG)4			Oc_348_aL	AGG				Oc_348_a	Oc_348_aL	143
Oc_3965_aL	CAGTTTTCCCAGTCACGACCCCTCATAGAGTTGTAGGATTGGG	Oc_3965_aR	GTTTAAAGGAGCATCAAACGATGAAGAG	(TCT)4	(TCT)4	TCT	150	150	150-150	Monomorphic													Oc_2868_aR	GTTTGGAGAGCTCAATCTTCCTGCTTCT		yam_O_contig_3965_a	Oc_3965_aL	TCT	3	12	(TCT)	4	(TCT)4			Oc_3965_aL	(TCT)4			Oc_3965_aL	TCT				Oc_3965_a	Oc_3965_aL	150
OsA8_c8005_3_aL	CAGTTTTCCCAGTCACGACTTGTTATTTTTGTGCAAAACGGTG	OsA8_c8005_3_aR	GTTTAAGATCTCGTAGCTGAGCTTGTCG	(ACG)4	(ACG)4	ACG	0	0	-	Didn't Work													Oc_1923_bR	GTTTACAACAACAGCAGCAACAAGAGTC		yam_O_singleton_A328-33_8_c8005_3_a	OsA8_c8005_3_aL	ACG	3	12	(ACG)	4	(ACG)4			OsA8_c8005_3_aL	(ACG)4			OsA8_c8005_3_aL	ACG				OsA8_c8005_3_a	OsA8_c8005_3_aL
Oc_277_aL	CAGTTTTCCCAGTCACGACAATTCCCGGGATCACACATCT	Oc_277_aR	GTTTATCGGTGTCGTACTGGTTCCTAAA	(GAC)4	(GAC)4	GAC	129	129	129-129	Monomorphic													Oc_1893_aR	GTTTAGATGTCCGATATCAAGCCCTCTC		yam_O_contig_277_a	Oc_277_aL	GAC	3	12	(GAC)	4	(GAC)4			Oc_277_aL	(GAC)4			Oc_277_aL	GAC				Oc_277_a	Oc_277_aL	129
OsA8_c5062_9_aL	CAGTTTTCCCAGTCACGACAGATCGTTATGCTTGCTGGTGATT	OsA8_c5062_9_aR	GTTTTACATTTATTCACAATCCATGGCG	(TA)6	(TA)6	TA	149	149	149-149	Monomorphic													Oc_1854_aR	GTTTGCCACCACTTCCATTGTTTAGAGT		yam_O_singleton_A328-33_8_c5062_9_a	OsA8_c5062_9_aL	TA	2	12	(TA)	6	(TA)6			OsA8_c5062_9_aL	(TA)6			OsA8_c5062_9_aL	TA				OsA8_c5062_9_a	OsA8_c5062_9_aL	149
Oc_330_aL	CAGTTTTCCCAGTCACGACGCTTCTTTCCAGTTCCAAGGGTAT	Oc_330_aR	GTTTTCCTTTTCTTTGTTGTTGTGCTTG	(AAG)4	(AAG)4	AAG	457	457	457-457	Monomorphic													Oc_2863_bR	GTTTTGTTTTGAGTGTACTCCATTTATTTCCA		yam_O_contig_330_a	Oc_330_aL	AAG	3	12	(AAG)	4	(AAG)4			Oc_330_aL	(AAG)4			Oc_330_aL	AAG				Oc_330_a	Oc_330_aL	457
Oc_3993_aL	CAGTTTTCCCAGTCACGACTTGTAGGCAATACCAGTAGGAACCA	Oc_3993_aR	GTTTAGGTTTCTGTTTGGGAATGACTTG	(AGC)4	(AGC)4	AGC	105	105	105-105	Monomorphic													OsA8_c9740_2_aR	GTTTCCCATTTCCAACCTCAAGGATTAT		yam_O_contig_3993_a	Oc_3993_aL	AGC	3	12	(AGC)	4	(AGC)4			Oc_3993_aL	(AGC)4			Oc_3993_aL	AGC				Oc_3993_a	Oc_3993_aL	105
Oc_1165_aL	CAGTTTTCCCAGTCACGACAGTTTTGGTTGGCATTTGAAGAAG	Oc_1165_aR	GTTTAAACCAACTCAAAAGCTTATCACACA	(TA)6	(TA)6	TA	115	130	115-130	Polymorphic													Oc_6261_bR	GTTTAAAATCAAAAACCCACTAAAATCATCA		yam_O_contig_1165_a	Oc_1165_aL	TA	2	12	(TA)	6	(TA)6			Oc_1165_aL	(TA)6			Oc_1165_aL	TA				Oc_1165_a	Oc_1165_aL	116
Oc_1477_aL	CAGTTTTCCCAGTCACGACGACGATTCCTGGATCTATGCTTTG	Oc_1477_aR	GTTTTCCTCCACAAAAGTAGGAGGTTTG	(TA)6	(TA)6	TA	156	162	156-162	Polymorphic													Oc_4411_aR	GTTTTATCCCTCCAGCATCACCTCAC		yam_O_contig_1477_a	Oc_1477_aL	TA	2	12	(TA)	6	(TA)6			Oc_1477_aL	(TA)6			Oc_1477_aL	TA				Oc_1477_a	Oc_1477_aL	156
Oc_838_aL	CAGTTTTCCCAGTCACGACTGACCTTTTGTCCTTTGAAGACATT	Oc_838_aR	GTTTAAAGAGTCCAGGAAAGAACACAACA	(TA)6	(TA)6	TA	143	143	143-143	Monomorphic													Oc_4347_aR	GTTTCAGATGATTTGATAGCTGCTGCAC		yam_O_contig_838_a	Oc_838_aL	TA	2	12	(TA)	6	(TA)6			Oc_838_aL	(TA)6			Oc_838_aL	TA				Oc_838_a	Oc_838_aL	143
Oc_6956_aL	CAGTTTTCCCAGTCACGACTATACAGTGCCGTGTCTGTTTGTC	Oc_6956_aR	GTTTACATTACTGATACAACCAAAATACCCTT	(CAT)4	(CAT)4	CAT	116	128	116-128	Polymorphic													Os87_lrc7943_aR	GTTTGCTCGGCAACTTATTAATGGTGAG		yam_O_contig_6956_a	Oc_6956_aL	CAT	3	12	(CAT)	4	(CAT)4			Oc_6956_aL	(CAT)4			Oc_6956_aL	CAT				Oc_6956_a	Oc_6956_aL	116
Oc_35_aL	CAGTTTTCCCAGTCACGACCTAGACGCCCTCCTGCTTCTC	Oc_35_aR	GTTTCATTGTTCACCTTCTCCTTCTGCT	(AGA)4	(AGA)4	AGA	334	334	334-334	Monomorphic													Os87_lrc6408_aR	GTTTGACATCTGATTACCTTCTCCTTCCC		yam_O_contig_35_a	Oc_35_aL	AGA	3	12	(AGA)	4	(AGA)4			Oc_35_aL	(AGA)4			Oc_35_aL	AGA				Oc_35_a	Oc_35_aL	334
Oc_6231_aL	CAGTTTTCCCAGTCACGACAGCAAGGTTCTTGGCTCCCTAATA	Oc_6231_aR	GTTTAGGATTCACAGGCACACAATTACA	(AT)6	(AT)6	AT	147	147	147-147	Monomorphic													Oc_1799_aR	GTTTAGTTACAAAACAACAACGCCAACA		yam_O_contig_6231_a	Oc_6231_aL	AT	2	12	(AT)	6	(AT)6			Oc_6231_aL	(AT)6			Oc_6231_aL	AT				Oc_6231_a	Oc_6231_aL	147
Oc_3011_aL	CAGTTTTCCCAGTCACGACACATTTCACCTCTTCTTTTGGCAG	Oc_3011_aR	GTTTAACCAGCATGCGTGAATTACAAC	(GTT)4	(GTT)4	GTT	173	176	173-176	Polymorphic													Os87_lrc3745_aR	GTTTCTTCCATTTCTCTGGCTGAACATC		yam_O_contig_3011_a	Oc_3011_aL	GTT	3	12	(GTT)	4	(GTT)4			Oc_3011_aL	(GTT)4			Oc_3011_aL	GTT				Oc_3011_a	Oc_3011_aL	173
Os87_c10818_aL	CAGTTTTCCCAGTCACGACTCTCCGGACTCTCACCTTCAGTAG	Os87_c10818_aR	GTTTAAGTCGATGTCGACCATCTCGTA	(AG)6	(AG)6	AG	0	0	-	Didn't Work													Os87_lrc5487_aR	GTTTGAACCACATCCTACTACAATGAACACAC		yam_O_singleton_87-01091-33_1_c10818_a	Os87_c10818_aL	AG	2	12	(AG)	6	(AG)6			Os87_c10818_aL	(AG)6			Os87_c10818_aL	AG				Os87_c10818_a	Os87_c10818_aL
Oc_6673_aL	CAGTTTTCCCAGTCACGACTACTTCGCCTTATCCTCCTCTGTG	Oc_6673_aR	GTTTGGGATCGCCCTTTTTCTCTC	(GGC)4	(GGC)4	GGC	167	172	167-172	Polymorphic													Oc_304_aR	GTTTTGAATTTCACTGATCATCACTTTTTCA		yam_O_contig_6673_a	Oc_6673_aL	GGC	3	12	(GGC)	4	(GGC)4			Oc_6673_aL	(GGC)4			Oc_6673_aL	GGC				Oc_6673_a	Oc_6673_aL	167
Oc_5050_aL	CAGTTTTCCCAGTCACGACCTCCACTTCCACATCCACTCCTAT	Oc_5050_aR	GTTTTTCATAATGCATTCCAGACAACAAG	(AT)6	(AT)6	AT	169	175	169-175	Polymorphic													Oc_5888_aR	GTTTCATCAACATTCAACATGGAATTAAGAC		yam_O_contig_5050_a	Oc_5050_aL	AT	2	12	(AT)	6	(AT)6			Oc_5050_aL	(AT)6			Oc_5050_aL	AT				Oc_5050_a	Oc_5050_aL	169
Oc_845_bL	CAGTTTTCCCAGTCACGACGACATTTGTCCACTGGTCTTTGTG	Oc_845_bR	GTTTATTCTCTCCATGGTTAAATGCCAA	(TCT)4	(TCT)4	TCT	124	124	124-124	Monomorphic													Oc_3776_aR	GTTTCTCCATCATCGTCGGATACAGAG		yam_O_contig_845_b	Oc_845_bL	TCT	3	12	(TCT)	4	(TCT)4			Oc_845_bL	(TCT)4			Oc_845_bL	TCT				Oc_845_b	Oc_845_bL	124
Oc_2870_aL	CAGTTTTCCCAGTCACGACCCATATGTTTTGCCTTTTGTTTCA	Oc_2870_aR	GTTTATGGAATTTCCGCATCATAAAACT	(TTA)4	(TTA)4	TTA	180	180	180-180	Monomorphic													Oc_5569_aR	GTTTTTTACACGTCATCACTCCATCACC		yam_O_contig_2870_a	Oc_2870_aL	TTA	3	12	(TTA)	4	(TTA)4			Oc_2870_aL	(TTA)4			Oc_2870_aL	TTA				Oc_2870_a	Oc_2870_aL	180
Oc_3139_aL	CAGTTTTCCCAGTCACGACTTGTGTACAGCCCCCTTCTTTTTA	Oc_3139_aR	GTTTTGTCATCTTCGTCGATTGATTGAT	(GAA)4	(GAA)4	GAA	153	162	153-162	Polymorphic													Oc_6095_aR	GTTTTATGCGATGTTGAGTCAGGTGAAC		yam_O_contig_3139_a	Oc_3139_aL	GAA	3	12	(GAA)	4	(GAA)4			Oc_3139_aL	(GAA)4			Oc_3139_aL	GAA				Oc_3139_a	Oc_3139_aL	153
OsB9_c11828_2_aL	CAGTTTTCCCAGTCACGACATTCTTCCAACCCAAGCAATCC	OsB9_c11828_2_aR	GTTTGCGAAGATGACCTCGATGAGA	(TC)6	(TC)6	TC	134	138	134-138	Polymorphic													OsB9_c11806_4_aR	GTTTTGGTGAGTTCTTCTCCAAGATTGA		yam_O_singleton_B310-33_9_c11828_2_a	OsB9_c11828_2_aL	TC	2	12	(TC)	6	(TC)6			OsB9_c11828_2_aL	(TC)6			OsB9_c11828_2_aL	TC				OsB9_c11828_2_a	OsB9_c11828_2_aL	134
Os87_c11550_aL	CAGTTTTCCCAGTCACGACTCAATCGGGGTAGCTATTCATTTT	Os87_c11550_aR	GTTTTTTCGTAACATCAGTTGTTCTTTCATT	(AT)6	(AT)6	AT	183	183	183-183	Monomorphic													Os87_c3563_aR	GTTTCACTGGGATGGAGAAATCCCT		yam_O_singleton_87-01091-33_1_c11550_a	Os87_c11550_aL	AT	2	12	(AT)	6	(AT)6			Os87_c11550_aL	(AT)6			Os87_c11550_aL	AT				Os87_c11550_a	Os87_c11550_aL	183
Os87_lrc4432_aL	CAGTTTTCCCAGTCACGACCGTGTTGGCAAAAAGCAGTG	Os87_lrc4432_aR	GTTTAAAAGCCCTAACTGGTGACCTGA	(GCG)4	(GCG)4	GCG	123	129	123-129	Polymorphic													Oc_5017_aR	GTTTCGAATTAGTCCTTGCATTGTTTCC		yam_O_singleton_87-01091-33_1_lrc4432_a	Os87_lrc4432_aL	GCG	3	12	(GCG)	4	(GCG)4			Os87_lrc4432_aL	(GCG)4			Os87_lrc4432_aL	GCG				Os87_lrc4432_a	Os87_lrc4432_aL	123
OsA8_c14388_2_aL	CAGTTTTCCCAGTCACGACTCTGTCACTTTGGTCGAATATCCA	OsA8_c14388_2_aR	GTTTACATTGCTCCAGGTATGTGTGTCA	(AGT)4	(AGT)4	AGT	163	165	163-165	Polymorphic													Oc_5405_bR	GTTTAGTGTTGAACTGAAGTGTGGCTGT		yam_O_singleton_A328-33_8_c14388_2_a	OsA8_c14388_2_aL	AGT	3	12	(AGT)	4	(AGT)4			OsA8_c14388_2_aL	(AGT)4			OsA8_c14388_2_aL	AGT				OsA8_c14388_2_a	OsA8_c14388_2_aL	163
Oc_2879_aL	CAGTTTTCCCAGTCACGACCTCTTCCAATTCACGCCAATCTAC	Oc_2879_aR	GTTTTGATGGTCTTAAGTCTTCCTTCCG	(ATG)4	(ATG)4	ATG	0	0	-	Didn't Work													Os87_c3307_aR	GTTTTGGTTGTGCTTATCCTCTTCTTCC		yam_O_contig_2879_a	Oc_2879_aL	ATG	3	12	(ATG)	4	(ATG)4			Oc_2879_aL	(ATG)4			Oc_2879_aL	ATG				Oc_2879_a	Oc_2879_aL
OsA8_c8687_3_aL	CAGTTTTCCCAGTCACGACACTGCTGGTTTGAATTTCTCGTTC	OsA8_c8687_3_aR	GTTTGTTGAACTCAATCAGATCCCCATC	(TCT)4	(TCT)4	TCT	211	217	211-217	Polymorphic																yam_O_singleton_A328-33_8_c8687_3_a	OsA8_c8687_3_aL	TCT	3	12	(TCT)	4	(TCT)4			OsA8_c8687_3_aL	(TCT)4			OsA8_c8687_3_aL	TCT				OsA8_c8687_3_a	OsA8_c8687_3_aL	211
Oc_30_aL	CAGTTTTCCCAGTCACGACAAGAAGAAGCACCACTTCTTTGGA	Oc_30_aR	GTTTTGCCAAACATACAACAAAAGGAGA	(AT)6	(AT)6	AT	163	163	163-163	Monomorphic													Oc_4035_aL	CAGTTTTCCCAGTCACGACGCAATGCAATGCTTGTCATAGATA		yam_O_contig_30_a	Oc_30_aL	AT	2	12	(AT)	6	(AT)6			Oc_30_aL	(AT)6			Oc_30_aL	AT				Oc_30_a	Oc_30_aL	163
Oc_3054_aL	CAGTTTTCCCAGTCACGACAGAGCTTTGAGCATAACACTGTGC	Oc_3054_aR	GTTTATTGCATCCTCACAGAACAACAAA	(GAT)4	(GAT)4	GAT	149	149	149-149	Monomorphic													Oc_4895_aL	CAGTTTTCCCAGTCACGACCTGAATTCTTGGTCTTTGGCGAT		yam_O_contig_3054_a	Oc_3054_aL	GAT	3	12	(GAT)	4	(GAT)4			Oc_3054_aL	(GAT)4			Oc_3054_aL	GAT				Oc_3054_a	Oc_3054_aL	149
Oc_108_bL	CAGTTTTCCCAGTCACGACTCATGTTGCTTTGCTTGCTATTGT	Oc_108_bR	GTTTGCATCAACTACATCATAAACACAGGG	(TTG)4	(TTG)4	TTG	112	116	112-116	Polymorphic													Oc_809_aL	CAGTTTTCCCAGTCACGACAAGCATTCTACCATTGTGTGCAAG		yam_O_contig_108_b	Oc_108_bL	TTG	3	12	(TTG)	4	(TTG)4			Oc_108_bL	(TTG)4			Oc_108_bL	TTG				Oc_108_b	Oc_108_bL	112
Oc_3335_aL	CAGTTTTCCCAGTCACGACAATGCCAGAGGAGGATATGTGAAA	Oc_3335_aR	GTTTTGCTGCAATTATTCCCTTTAACAAC	(TAT)4	(TAT)4	TAT	156	156	156-156	Monomorphic													Oc_1965_aL	CAGTTTTCCCAGTCACGACAGCCTTCAACCTCATCTTAAAGCA		yam_O_contig_3335_a	Oc_3335_aL	TAT	3	12	(TAT)	4	(TAT)4			Oc_3335_aL	(TAT)4			Oc_3335_aL	TAT				Oc_3335_a	Oc_3335_aL	156
Oc_3002_aL	CAGTTTTCCCAGTCACGACGCTGCTGTTTGATGGTTATCCCTA	Oc_3002_aR	GTTTGCAACCTCCTTGTGAACAGAAAAC	(TTG)4	(TTG)4	TTG	156	156	156-156	Monomorphic													Oc_2019_aL	CAGTTTTCCCAGTCACGACCCCTAAATATCAATCACTCCCAAAA		yam_O_contig_3002_a	Oc_3002_aL	TTG	3	12	(TTG)	4	(TTG)4			Oc_3002_aL	(TTG)4			Oc_3002_aL	TTG				Oc_3002_a	Oc_3002_aL	156
Oc_734_aL	CAGTTTTCCCAGTCACGACTAACCGATCGATAGTTGGCTTCAT	Oc_734_aR	GTTTAAGAGACCGAAGACACAGTCAACC	(TCA)4	(TCA)4	TCA	136	136	136-136	Monomorphic													Oc_4329_aL	CAGTTTTCCCAGTCACGACTCCCAACTAAATTAGAAAGGAACTGC		yam_O_contig_734_a	Oc_734_aL	TCA	3	12	(TCA)	4	(TCA)4			Oc_734_aL	(TCA)4			Oc_734_aL	TCA				Oc_734_a	Oc_734_aL	136
OsB9_c15091_2_aL	CAGTTTTCCCAGTCACGACGAGGAATGCAGGTGAGAAGAGTTC	OsB9_c15091_2_aR	GTTTGTCAAAGAAATCCAAGGTTGTTGC	(AGC)4	(AGC)4	AGC	169	172	169-172	Polymorphic													Oc_2640_aL	CAGTTTTCCCAGTCACGACTCAAAAGCTCAAAACTTCACTCCC		yam_O_singleton_B310-33_9_c15091_2_a	OsB9_c15091_2_aL	AGC	3	12	(AGC)	4	(AGC)4			OsB9_c15091_2_aL	(AGC)4			OsB9_c15091_2_aL	AGC				OsB9_c15091_2_a	OsB9_c15091_2_aL	169
Oc_3348_aL	CAGTTTTCCCAGTCACGACTTTAGAAGTCCACCTTGAGCTATCG	Oc_3348_aR	GTTTTTTCCCAAAACATCCAGAACTCAT	(AT)6	(AT)6	AT	116	122	116-122	Polymorphic													Oc_525_aL	CAGTTTTCCCAGTCACGACTCTCTGCTCTGCTACTTGTGCTTC		yam_O_contig_3348_a	Oc_3348_aL	AT	2	12	(AT)	6	(AT)6			Oc_3348_aL	(AT)6			Oc_3348_aL	AT				Oc_3348_a	Oc_3348_aL	116
Oc_815_bL	CAGTTTTCCCAGTCACGACTTTATGACATGCTCCAGGTGCTTA	Oc_815_bR	GTTTTTTTACCCCTAACCAAACCAAACA	(CTT)4	(CTT)4	CTT	0	0	-	Didn't Work													Oc_93_aL	CAGTTTTCCCAGTCACGACGACCGCCTCTGCAAGATTTATTAC		yam_O_contig_815_b	Oc_815_bL	CTT	3	12	(CTT)	4	(CTT)4			Oc_815_bL	(CTT)4			Oc_815_bL	CTT				Oc_815_b	Oc_815_bL
OsA8_c11757_2_aL	CAGTTTTCCCAGTCACGACAGAACCTGAAGACGTTCCATGC	OsA8_c11757_2_aR	GTTTTCTTCTCCCCTTTGATCTTCTCCT	(GA)6	(GA)6	GA	121	161	121-161	Polymorphic													Oc_7063_bL	CAGTTTTCCCAGTCACGACACCAAACCTCTTTCCAGTTTCCTC		yam_O_singleton_A328-33_8_c11757_2_a	OsA8_c11757_2_aL	GA	2	12	(GA)	6	(GA)6			OsA8_c11757_2_aL	(GA)6			OsA8_c11757_2_aL	GA				OsA8_c11757_2_a	OsA8_c11757_2_aL	121
Oc_797_aL	CAGTTTTCCCAGTCACGACCAGCTTGAGGGTGTTCTCATCTCT	Oc_797_aR	GTTTTGGTGATGGTACAATTGCATTTTCT	(TGT)4	(TGT)4	TGT	177	177	177-177	Monomorphic													Oc_1980_aL	CAGTTTTCCCAGTCACGACGCTTTTAAGGGGAGAAAGCAAGAC		yam_O_contig_797_a	Oc_797_aL	TGT	3	12	(TGT)	4	(TGT)4			Oc_797_aL	(TGT)4			Oc_797_aL	TGT				Oc_797_a	Oc_797_aL	177
Oc_3579_aL	CAGTTTTCCCAGTCACGACATTCCCGGGATTTAGTTCCTCTCT	Oc_3579_aR	GTTTTGTGAGCTTCACCAGCTAACTTTG	(CT)6	(CT)6	CT	0	0	-	Didn't Work													Oc_6858_aL	CAGTTTTCCCAGTCACGACAAGACTTTGTTCAGGCTGCAATTC		yam_O_contig_3579_a	Oc_3579_aL	CT	2	12	(CT)	6	(CT)6			Oc_3579_aL	(CT)6			Oc_3579_aL	CT				Oc_3579_a	Oc_3579_aL
Oc_5353_aL	CAGTTTTCCCAGTCACGACTTTCGTGTTGCATGTCTTTGTTTT	Oc_5353_aR	GTTTGCAAATCCACATCCAAGAGACTTT	(TAT)4	(TAT)4	TAT	157	157	157-157	Monomorphic													Oc_274_aL	CAGTTTTCCCAGTCACGACTTACGTACCAAAACCCACAACTTC		yam_O_contig_5353_a	Oc_5353_aL	TAT	3	12	(TAT)	4	(TAT)4			Oc_5353_aL	(TAT)4			Oc_5353_aL	TAT				Oc_5353_a	Oc_5353_aL	157
Oc_1065_aL	CAGTTTTCCCAGTCACGACTTGCAATTCAACAACAAAATTTGAA	Oc_1065_aR	GTTTATTCAGATTAGAAGAAGACCGCCC	(AAT)4	(AAT)4	AAT	163	163	163-163	Monomorphic													Oc_917_aL	CAGTTTTCCCAGTCACGACCGAAAAATTCGGGGACAAAAA		yam_O_contig_1065_a	Oc_1065_aL	AAT	3	12	(AAT)	4	(AAT)4			Oc_1065_aL	(AAT)4			Oc_1065_aL	AAT				Oc_1065_a	Oc_1065_aL	163
Oc_6560_bL	CAGTTTTCCCAGTCACGACAAACAACCGTTGCTGCTGCT	Oc_6560_bR	GTTTCCTTCTTCGTCTTCCTTTTCCTTC	(GCT)4	(GCT)4	GCT	167	167	167-167	Monomorphic													Oc_6682_aL	CAGTTTTCCCAGTCACGACTGGTAAATGAAAACACTATTGACAGAGC		yam_O_contig_6560_b	Oc_6560_bL	GCT	3	12	(GCT)	4	(GCT)4			Oc_6560_bL	(GCT)4			Oc_6560_bL	GCT				Oc_6560_b	Oc_6560_bL	167
Oc_4540_aL	CAGTTTTCCCAGTCACGACTCTTGTTTTCTTGTTTTTGTCCAAGT	Oc_4540_aR	GTTTTGTATGAATGGTGCATTTCCATTT	(TAA)4	(TAA)4	TAA	161	161	161-161	Monomorphic													Oc_815_aL	CAGTTTTCCCAGTCACGACGGTGGAGGAAGCTCATACACTGTC		yam_O_contig_4540_a	Oc_4540_aL	TAA	3	12	(TAA)	4	(TAA)4			Oc_4540_aL	(TAA)4			Oc_4540_aL	TAA				Oc_4540_a	Oc_4540_aL	161
Oc_2441_aL	CAGTTTTCCCAGTCACGACGAACACACATGATTTCCCTTTTCC	Oc_2441_aR	GTTTATTGCGTTGAGCAAACATCAAAT	(TTG)4	(TTG)4	TTG	182	182	182-182	Monomorphic													Oc_148_aL	CAGTTTTCCCAGTCACGACTGTTGGTGTTGATTAAGAGTAGCGG		yam_O_contig_2441_a	Oc_2441_aL	TTG	3	12	(TTG)	4	(TTG)4			Oc_2441_aL	(TTG)4			Oc_2441_aL	TTG				Oc_2441_a	Oc_2441_aL	182
Oc_2441_bL	CAGTTTTCCCAGTCACGACTCCATTTCTTCACAACTACTGGCT	Oc_2441_bR	GTTTTCAAAACTGTTGTCAGACAGATAAAAA	(TA)6	(TA)6	TA	168	168	168-168	Monomorphic													Oc_81_aL	CAGTTTTCCCAGTCACGACGGGATTAGTGTCAAGCTGAGTGGT		yam_O_contig_2441_b	Oc_2441_bL	TA	2	12	(TA)	6	(TA)6			Oc_2441_bL	(TA)6			Oc_2441_bL	TA				Oc_2441_b	Oc_2441_bL	168
Oc_5087_aL	CAGTTTTCCCAGTCACGACGGGAGAACGCTCGAAGAAGAC	Oc_5087_aR	GTTTGACGGGGAGAAGAGAAGTAGAAGG	(GAA)4	(GAA)4	GAA	147	147	147-147	Monomorphic													Oc_441_aL	CAGTTTTCCCAGTCACGACGCTGATTGGTCCTCACAGTACTAGC		yam_O_contig_5087_a	Oc_5087_aL	GAA	3	12	(GAA)	4	(GAA)4			Oc_5087_aL	(GAA)4			Oc_5087_aL	GAA				Oc_5087_a	Oc_5087_aL	147
OsA8_c11048_2_aL	CAGTTTTCCCAGTCACGACAGAAGTTTGTCAGGCATCTTCCAC	OsA8_c11048_2_aR	GTTTCAACATCAGAAGGATAAATTACCCAAA	(TTG)4	(TTG)4	TTG	158	165	158-165	Polymorphic													Os87_c4651_aL	CAGTTTTCCCAGTCACGACTGGAGCTCTTCTTGGGATGTTTAT		yam_O_singleton_A328-33_8_c11048_2_a	OsA8_c11048_2_aL	TTG	3	12	(TTG)	4	(TTG)4			OsA8_c11048_2_aL	(TTG)4			OsA8_c11048_2_aL	TTG				OsA8_c11048_2_a	OsA8_c11048_2_aL	158
Oc_3766_aL	CAGTTTTCCCAGTCACGACCTAAGACGTTTCTCGGGGAGTTCT	Oc_3766_aR	GTTTAAGAGTCGGTGTGTGGGATTAAAA	(TGC)4	(TGC)4	TGC	154	160	154-160	Polymorphic													Oc_5028_aL	CAGTTTTCCCAGTCACGACCACTGGGGCAGATCAAATTAAAAG		yam_O_contig_3766_a	Oc_3766_aL	TGC	3	12	(TGC)	4	(TGC)4			Oc_3766_aL	(TGC)4			Oc_3766_aL	TGC				Oc_3766_a	Oc_3766_aL	154
Oc_3766_bL	CAGTTTTCCCAGTCACGACTGGAATGCTATTCTTAATTCCATGA	Oc_3766_bR	GTTTGCATTGCTATGTATTCTGTAGCAGC	(CA)6	(CA)6	CA	175	177	175-177	Polymorphic													Oc_3705cL	CAGTTTTCCCAGTCACGACCAAGCTGGTGATCTTATTCATTGG		yam_O_contig_3766_b	Oc_3766_bL	CA	2	12	(CA)	6	(CA)6			Oc_3766_bL	(CA)6			Oc_3766_bL	CA				Oc_3766_b	Oc_3766_bL	175
Oc_5606_bL	CAGTTTTCCCAGTCACGACATATCGACGATGTCTCCTCCTCC	Oc_5606_bR	GTTTATCCACCCAACAATTACCACAAAA	(TGA)4	(TGA)4	TGA	160	160	160-160	Monomorphic													Oc_2743_aL	CAGTTTTCCCAGTCACGACCGCTTGTGTAGTGTTTCCATGTTC		yam_O_contig_5606_b	Oc_5606_bL	TGA	3	12	(TGA)	4	(TGA)4			Oc_5606_bL	(TGA)4			Oc_5606_bL	TGA				Oc_5606_b	Oc_5606_bL	160
Os87_c4229_aL	CAGTTTTCCCAGTCACGACTACTCAAAAGCCAAGCTTTGAACC	Os87_c4229_aR	GTTTGATGCAAGGTGAGATTAGGGAGAA	(CTT)4	(CTT)4	CTT	152	158	152-158	Polymorphic													Oc_148_aL	CAGTTTTCCCAGTCACGACTGTTGGTGTTGATTAAGAGTAGCGG		yam_O_singleton_87-01091-33_1_c4229_a	Os87_c4229_aL	CTT	3	12	(CTT)	4	(CTT)4			Os87_c4229_aL	(CTT)4			Os87_c4229_aL	CTT				Os87_c4229_a	Os87_c4229_aL	152
Oc_5183_aL	CAGTTTTCCCAGTCACGACGGGGACAAGTCCAAAGAAAGAGAG	Oc_5183_aR	GTTTAAAGGAGCCAATCTAGGGTTTCAC	(GA)6	(GA)6	GA	143	152	143-152	Polymorphic													OsA8_c8634_3_aL	CAGTTTTCCCAGTCACGACGATCACTTTGGTAAGCTTTGGCAG		yam_O_contig_5183_a	Oc_5183_aL	GA	2	12	(GA)	6	(GA)6			Oc_5183_aL	(GA)6			Oc_5183_aL	GA				Oc_5183_a	Oc_5183_aL	143
Os87_c9577_aL	CAGTTTTCCCAGTCACGACTACCAAAGGATGCAAACCCTAACA	Os87_c9577_aR	GTTTATCGTAAGAACTGTTGTTGCCACC	(TGG)4	(TGG)4	TGG	122	122	122-122	Monomorphic													Oc_1707_aL	CAGTTTTCCCAGTCACGACGGTTGTGACCTTTGGATGTAGTTTTT		yam_O_singleton_87-01091-33_1_c9577_a	Os87_c9577_aL	TGG	3	12	(TGG)	4	(TGG)4			Os87_c9577_aL	(TGG)4			Os87_c9577_aL	TGG				Os87_c9577_a	Os87_c9577_aL	122
Oc_5680_aL	CAGTTTTCCCAGTCACGACTGGAGATCTCTTTGTTTGCTTTGA	Oc_5680_aR	GTTTCACACGCATTTCATCAAACATTCT	(AT)6	(AT)6	AT	139	193	139-193	Polymorphic													Oc_50_aL	CAGTTTTCCCAGTCACGACGCCCTCTGATGGCCTCTAGTTTTA		yam_O_contig_5680_a	Oc_5680_aL	AT	2	12	(AT)	6	(AT)6			Oc_5680_aL	(AT)6			Oc_5680_aL	AT				Oc_5680_a	Oc_5680_aL	139
Oc_7179_aL	CAGTTTTCCCAGTCACGACTCCAACTCCACCAAAGTACACAGA	Oc_7179_aR	GTTTAATATCTTTGTTTGCATCATGGGG	(ACA)4	(ACA)4	ACA	166	166	166-166	Monomorphic													Oc_5076_aL	CAGTTTTCCCAGTCACGACACTCTCATTGTTGGGTTTGTGGTT		yam_O_contig_7179_a	Oc_7179_aL	ACA	3	12	(ACA)	4	(ACA)4			Oc_7179_aL	(ACA)4			Oc_7179_aL	ACA				Oc_7179_a	Oc_7179_aL	166
Oc_628_aL	CAGTTTTCCCAGTCACGACGCTGGACATCGAAAACCTTGTACT	Oc_628_aR	GTTTAGAGCAAAAGCAGTACAACAAGCC	(ATT)4	(ATT)4	ATT	166	166	166-166	Monomorphic													Oc_6143_aL	CAGTTTTCCCAGTCACGACTGGACAAATTCCATCATAGAAGAACC		yam_O_contig_628_a	Oc_628_aL	ATT	3	12	(ATT)	4	(ATT)4			Oc_628_aL	(ATT)4			Oc_628_aL	ATT				Oc_628_a	Oc_628_aL	166
Oc_3374_aL	CAGTTTTCCCAGTCACGACGCCAGAGGTTACGGGTACAGATAC	Oc_3374_aR	GTTTCTACAAACCACTGCTGGCTCTACA	(AT)6	(AT)6	AT	166	172	166-172	Polymorphic													Oc_5523_aL	CAGTTTTCCCAGTCACGACCATTGTAAAGCTTGGTTGCAGAGA		yam_O_contig_3374_a	Oc_3374_aL	AT	2	12	(AT)	6	(AT)6			Oc_3374_aL	(AT)6			Oc_3374_aL	AT				Oc_3374_a	Oc_3374_aL	166
Oc_3516_aL	CAGTTTTCCCAGTCACGACGATCATCTCCTTTAGCTGCACCAC	Oc_3516_aR	GTTTAGGTACCAAAGGCTAATGACGATG	(TCT)4	(TCT)4	TCT	167	174	167-174	Polymorphic													Oc_5164_aL	CAGTTTTCCCAGTCACGACTTTGATTCTTTTCATTTTTGGTTTGG		yam_O_contig_3516_a	Oc_3516_aL	TCT	3	12	(TCT)	4	(TCT)4			Oc_3516_aL	(TCT)4			Oc_3516_aL	TCT				Oc_3516_a	Oc_3516_aL	167
Oc_5255_aL	CAGTTTTCCCAGTCACGACTGCAGTCATTGGTGTAGCAAACTT	Oc_5255_aR	GTTTTTGACATGAAGATCAAACAACATCAA	(TA)6	(TA)6	TA	131	140	131-140	Polymorphic													Oc_4595_aL	CAGTTTTCCCAGTCACGACTACCGTAACCGGCTTAGTTGTAGC		yam_O_contig_5255_a	Oc_5255_aL	TA	2	12	(TA)	6	(TA)6			Oc_5255_aL	(TA)6			Oc_5255_aL	TA				Oc_5255_a	Oc_5255_aL	131
Oc_4734_aL	CAGTTTTCCCAGTCACGACGCAGCACTCAAAGAGGAAGAAAAG	Oc_4734_aR	GTTTACTCCAATTTAGCCTGCACTCTTG	(GCT)4	(GCT)4	GCT	100	100	100-100	Monomorphic													Os87_lrc3675_aL	CAGTTTTCCCAGTCACGACAGCAGCAGAGAATTGACAACCCTA		yam_O_contig_4734_a	Oc_4734_aL	GCT	3	12	(GCT)	4	(GCT)4			Oc_4734_aL	(GCT)4			Oc_4734_aL	GCT				Oc_4734_a	Oc_4734_aL	100
OsB9_c10514_2_aL	CAGTTTTCCCAGTCACGACAACATAAGCATGGCTTCTTCATCA	OsB9_c10514_2_aR	GTTTCACCTAAACGAACCTTGATGTGTC	(TTC)4	(TTC)4	TTC	174	174	174-174	Monomorphic													Oc_119_aL	CAGTTTTCCCAGTCACGACCAGAAACCTGAGACCAAGTCCATT		yam_O_singleton_B310-33_9_c10514_2_a	OsB9_c10514_2_aL	TTC	3	12	(TTC)	4	(TTC)4			OsB9_c10514_2_aL	(TTC)4			OsB9_c10514_2_aL	TTC				OsB9_c10514_2_a	OsB9_c10514_2_aL	174
Oc_649_bL	CAGTTTTCCCAGTCACGACCTCTTGCCTTATTCTCATCCTCAGA	Oc_649_bR	GTTTAGACATGCTTGCAATCCAAATACA	(TAC)4	(TAC)4	TAC	119	125	119-125	Polymorphic													Oc_5458_aL	CAGTTTTCCCAGTCACGACAAAAAGCTCCCCGATAAGTTGGT		yam_O_contig_649_b	Oc_649_bL	TAC	3	12	(TAC)	4	(TAC)4			Oc_649_bL	(TAC)4			Oc_649_bL	TAC				Oc_649_b	Oc_649_bL	119
Oc_1519_aL	CAGTTTTCCCAGTCACGACCCAAAGTGAAGGTGAAGATGATGA	Oc_1519_aR	GTTTAGAGAAGACGCCGGAATAAAGAAC	(AGA)4	(AGA)4	AGA	150	150	150-150	Monomorphic													Oc_7299_aL	CAGTTTTCCCAGTCACGACCAATCCATGATTCTTCGATCTCTAAA		yam_O_contig_1519_a	Oc_1519_aL	AGA	3	12	(AGA)	4	(AGA)4			Oc_1519_aL	(AGA)4			Oc_1519_aL	AGA				Oc_1519_a	Oc_1519_aL	150
Oc_3313_aL	CAGTTTTCCCAGTCACGACGAATAGCTTCAAACTCCCCAACTG	Oc_3313_aR	GTTTAAAGCAGTTTTTGGGTAGACTTGG	(ACC)4	(ACC)4	ACC	0	0	-	Didn't Work													Oc_469_aL	CAGTTTTCCCAGTCACGACTCCTCTGTAACATCATCCTTTGGA		yam_O_contig_3313_a	Oc_3313_aL	ACC	3	12	(ACC)	4	(ACC)4			Oc_3313_aL	(ACC)4			Oc_3313_aL	ACC				Oc_3313_a	Oc_3313_aL
Oc_5259_aL	CAGTTTTCCCAGTCACGACAGCTACTGCCAAATGGAAAAGTTG	Oc_5259_aR	GTTTGTTGCATCATGGTTTAACCGACTA	(ACA)4	(ACA)4	ACA	169	169	169-169	Monomorphic													Oc_6374_aL	CAGTTTTCCCAGTCACGACGGCCTCGGATGATCATTTCTT		yam_O_contig_5259_a	Oc_5259_aL	ACA	3	12	(ACA)	4	(ACA)4			Oc_5259_aL	(ACA)4			Oc_5259_aL	ACA				Oc_5259_a	Oc_5259_aL	169
Oc_2588_aL	CAGTTTTCCCAGTCACGACTTCTGCAAACAACCAAGAAACTCA	Oc_2588_aR	GTTTCTTCTTCTTCTGGGTCGTCATCAT	(ATG)4	(ATG)4	ATG	99	129	99-129	Polymorphic													OsA8_c5283_4_aL	CAGTTTTCCCAGTCACGACCTTCACAAGGAATGCTAGGGAGAA		yam_O_contig_2588_a	Oc_2588_aL	ATG	3	12	(ATG)	4	(ATG)4			Oc_2588_aL	(ATG)4			Oc_2588_aL	ATG				Oc_2588_a	Oc_2588_aL	99
Oc_634_aL	CAGTTTTCCCAGTCACGACAGGCCTTCTCTTTGTTGATTGTTG	Oc_634_aR	GTTTATTTTTGCTGATCATTTTGCAGGT	(TA)6	(TA)6	TA	169	169	169-169	Monomorphic													Oc_2947_bL	CAGTTTTCCCAGTCACGACATAAGATCTGCTGCTTGTTGGCAT		yam_O_contig_634_a	Oc_634_aL	TA	2	12	(TA)	6	(TA)6			Oc_634_aL	(TA)6			Oc_634_aL	TA				Oc_634_a	Oc_634_aL	169
Os87_c10305_aL	CAGTTTTCCCAGTCACGACGAAAGCTAAGGCAACAAGTGAGGA	Os87_c10305_aR	GTTTAAACCACTTCCAGCACTGCTAATC	(AGC)4	(AGC)4	AGC	161	167	161-167	Polymorphic													Oc_1395_aL	CAGTTTTCCCAGTCACGACAGGATAAACCCTCTGCCTGTTCAT		yam_O_singleton_87-01091-33_1_c10305_a	Os87_c10305_aL	AGC	3	12	(AGC)	4	(AGC)4			Os87_c10305_aL	(AGC)4			Os87_c10305_aL	AGC				Os87_c10305_a	Os87_c10305_aL	161
Oc_3618_bL	CAGTTTTCCCAGTCACGACGGACGATATTTTTCCCCATTTTTC	Oc_3618_bR	GTTTTACCATCAACACCGTCAGTGACTT	(TCA)4	(TCA)4	TCA	154	162	154-162	Polymorphic													Oc_4267_aL	CAGTTTTCCCAGTCACGACATCTTGATGGCTCCTTGAAGACAA		yam_O_contig_3618_b	Oc_3618_bL	TCA	3	12	(TCA)	4	(TCA)4			Oc_3618_bL	(TCA)4			Oc_3618_bL	TCA				Oc_3618_b	Oc_3618_bL	154
Oc_2390_aL	CAGTTTTCCCAGTCACGACCGATCATGAGGTTCTTCCCAACTA	Oc_2390_aR	GTTTAAATCCCAAACCAAATGACACATC	(TTG)4	(TTG)4	TTG	161	167	161-167	Polymorphic													Oc_44_aL	CAGTTTTCCCAGTCACGACACAAATTGGTGATGATGAGGCTG		yam_O_contig_2390_a	Oc_2390_aL	TTG	3	12	(TTG)	4	(TTG)4			Oc_2390_aL	(TTG)4			Oc_2390_aL	TTG				Oc_2390_a	Oc_2390_aL	161
Oc_5506_aL	CAGTTTTCCCAGTCACGACGTAGCCAGGGGTACCATAGGACG	Oc_5506_aR	GTTTAGTTTCCTTTTGGTCACCACCATC	(GGA)4	(GGA)4	GGA	182	182	182-182	Monomorphic													Oc_6026_aL	CAGTTTTCCCAGTCACGACGATAGGGCTGTGCATGAAACAAG		yam_O_contig_5506_a	Oc_5506_aL	GGA	3	12	(GGA)	4	(GGA)4			Oc_5506_aL	(GGA)4			Oc_5506_aL	GGA				Oc_5506_a	Oc_5506_aL	182
Oc_4153_aL	CAGTTTTCCCAGTCACGACCACGCTTGAGAAGGTGAAGTCC	Oc_4153_aR	GTTTCGAGATTAGCACATAAAGCAAGCA	(GGA)4	(GGA)4	GGA	253	265	253-265	Polymorphic													Oc_4895cL	CAGTTTTCCCAGTCACGACGCGCATGAAGACATAGCAAGTAGA		yam_O_contig_4153_a	Oc_4153_aL	GGA	3	12	(GGA)	4	(GGA)4			Oc_4153_aL	(GGA)4			Oc_4153_aL	GGA				Oc_4153_a	Oc_4153_aL	253
Oc_4837_aL	CAGTTTTCCCAGTCACGACCAAAGATAACACCAGACATGATATCCAA	Oc_4837_aR	GTTTTCATGCTTCTTGTTTCTTGTTTGC	(ACA)4	(ACA)4	ACA	157	157	157-157	Monomorphic													Oc_393_bL	CAGTTTTCCCAGTCACGACGTGGCTTACTGCAAGACGTTATCC		yam_O_contig_4837_a	Oc_4837_aL	ACA	3	12	(ACA)	4	(ACA)4			Oc_4837_aL	(ACA)4			Oc_4837_aL	ACA				Oc_4837_a	Oc_4837_aL	157
Oc_2262_aL	CAGTTTTCCCAGTCACGACGCAAGCTTCCCAGATAGTTCAAAA	Oc_2262_aR	GTTTGGTAGCAAAACCTAGAGCCACTGA	(ATC)4	(ATC)4	ATC	0	0	-	Didn't Work													Oc_2822_bL	CAGTTTTCCCAGTCACGACAAACCCATTAAAGCAAGGCTTCTC		yam_O_contig_2262_a	Oc_2262_aL	ATC	3	12	(ATC)	4	(ATC)4			Oc_2262_aL	(ATC)4			Oc_2262_aL	ATC				Oc_2262_a	Oc_2262_aL
Oc_235_aL	CAGTTTTCCCAGTCACGACTACCTTGGTATGAAAAGCACACGA	Oc_235_aR	GTTTATGGTGATCGACGAGGAGAGTATT	(TGG)4	(TGG)4	TGG	346	346	346-346	Monomorphic													Os87_lrc3379_aL	CAGTTTTCCCAGTCACGACGGTGATTATGGCCGTACGTCTAAC		yam_O_contig_235_a	Oc_235_aL	TGG	3	12	(TGG)	4	(TGG)4			Oc_235_aL	(TGG)4			Oc_235_aL	TGG				Oc_235_a	Oc_235_aL	346
Oc_3527_aL	CAGTTTTCCCAGTCACGACCTGCAACTGAAACTGATGAGCATT	Oc_3527_aR	GTTTCTTGTTTCGGAGCAATCTCTTTGT	(TAA)4	(TAA)4	TAA	168	168	168-168	Monomorphic													Oc_4035_aR	GTTTTCTTTGGCCTTTAATAATTTGAGCA		yam_O_contig_3527_a	Oc_3527_aL	TAA	3	12	(TAA)	4	(TAA)4			Oc_3527_aL	(TAA)4			Oc_3527_aL	TAA				Oc_3527_a	Oc_3527_aL	168
Oc_5267_aL	CAGTTTTCCCAGTCACGACGATGGAGAATGGCTCTATGCAGAT	Oc_5267_aR	GTTTCAAAACCACAATTTGGTCATCAGA	(CGA)4	(CGA)4	CGA	144	146	144-146	Polymorphic													Oc_4895_aR	GTTTTCAAAAGTTTTCGTCAAGAACGGT		yam_O_contig_5267_a	Oc_5267_aL	CGA	3	12	(CGA)	4	(CGA)4			Oc_5267_aL	(CGA)4			Oc_5267_aL	CGA				Oc_5267_a	Oc_5267_aL	144
Oc_4037_aL	CAGTTTTCCCAGTCACGACCATCAAGCCAATCACCACCAC	Oc_4037_aR	GTTTATAAACAACAGCATTGCCTCTTCC	(CCT)4	(CCT)4	CCT	165	165	165-165	Monomorphic													Oc_809_aR	GTTTAGTAGCACAACAACATCATAGGCG		yam_O_contig_4037_a	Oc_4037_aL	CCT	3	12	(CCT)	4	(CCT)4			Oc_4037_aL	(CCT)4			Oc_4037_aL	CCT				Oc_4037_a	Oc_4037_aL	165
Oc_6934_aL	CAGTTTTCCCAGTCACGACCATCAAACAGCCTCAACCTCAGTA	Oc_6934_aR	GTTTAAGCACCGCAAAAAGTTTACAGAC	(AGC)4	(AGC)4	AGC	0	0	-	Didn't Work													Oc_1965_aR	GTTTGGTAGTAGCATTGTTCCTCTAGTGGGT		yam_O_contig_6934_a	Oc_6934_aL	AGC	3	12	(AGC)	4	(AGC)4			Oc_6934_aL	(AGC)4			Oc_6934_aL	AGC				Oc_6934_a	Oc_6934_aL
Oc_246_bL	CAGTTTTCCCAGTCACGACCCTACAAGCCTCCTCACTACAGGT	Oc_246_bR	GTTTCAAAACAATGGACTTGGTTCTTCTT	(AAG)4	(AAG)4	AAG	111	114	111-114	Polymorphic													Oc_2019_aR	GTTTGGATGCATTATCCAACAGTCAAGA		yam_O_contig_246_b	Oc_246_bL	AAG	3	12	(AAG)	4	(AAG)4			Oc_246_bL	(AAG)4			Oc_246_bL	AAG				Oc_246_b	Oc_246_bL	111
Oc_73_bL	CAGTTTTCCCAGTCACGACGAGAAGTTTGCTTCTGTGCCATCT	Oc_73_bR	GTTTCATGTCCTCATCAGATTCCTCCTT	(TGG)4	(TGG)4	TGG	179	179	179-179	Monomorphic													Oc_4329_aR	GTTTTTTTCTCTGTTCATTCATGTGCTG		yam_O_contig_73_b	Oc_73_bL	TGG	3	12	(TGG)	4	(TGG)4			Oc_73_bL	(TGG)4			Oc_73_bL	TGG				Oc_73_b	Oc_73_bL	179
Oc_73_aL	CAGTTTTCCCAGTCACGACGATAAACCCTCGAAGCTCCAAAAC	Oc_73_aR	GTTTACCGTAGACAGCAAGCAAATAAGC	(GCG)4	(GCG)4	GCG	0	0	-	Didn't Work													Oc_2640_aR	GTTTCTATTCTTCAATCCCCCACAGAGA		yam_O_contig_73_a	Oc_73_aL	GCG	3	12	(GCG)	4	(GCG)4			Oc_73_aL	(GCG)4			Oc_73_aL	GCG				Oc_73_a	Oc_73_aL
Oc_5041_aL	CAGTTTTCCCAGTCACGACAGATTCCAAACAAGAGTTTGCTGC	Oc_5041_aR	GTTTCATCACATGGTTTGTCATAATTCCA	(TA)6	(TA)6	TA	169	169	169-169	Monomorphic													Oc_525_aR	GTTTCAAGGGAATTGGTCATACATCCAT		yam_O_contig_5041_a	Oc_5041_aL	TA	2	12	(TA)	6	(TA)6			Oc_5041_aL	(TA)6			Oc_5041_aL	TA				Oc_5041_a	Oc_5041_aL	169
Oc_283_aL	CAGTTTTCCCAGTCACGACAGAAAACTCTGAGAGACAGACCATTG	Oc_283_aR	GTTTTGATCCAAGTTTCAGATGGAAATG	(AGA)4	(AGA)4	AGA	155	155	155-155	Monomorphic													Oc_93_aR	GTTTCTACGGCCTATGTCTGTTGTGAGA		yam_O_contig_283_a	Oc_283_aL	AGA	3	12	(AGA)	4	(AGA)4			Oc_283_aL	(AGA)4			Oc_283_aL	AGA				Oc_283_a	Oc_283_aL	155
Oc_3113_aL	CAGTTTTCCCAGTCACGACTGCCGAACCATCAAGTTCTTTAAT	Oc_3113_aR	GTTTCCAAGATGAGAGAGCAAACAAGGT	(GAT)4	(GAT)4	GAT	173	174	173-174	Polymorphic													Oc_7063_bR	GTTTCACCTTAGTTCTTGCCATCGAGTC		yam_O_contig_3113_a	Oc_3113_aL	GAT	3	12	(GAT)	4	(GAT)4			Oc_3113_aL	(GAT)4			Oc_3113_aL	GAT				Oc_3113_a	Oc_3113_aL	173
Oc_2586_bL	CAGTTTTCCCAGTCACGACTGGTAGACCTCCAATGGAACTTTT	Oc_2586_bR	GTTTATCATCCAATCTCCACTTTTTCCA	(TGT)4	(TGT)4	TGT	170	170	170-170	Monomorphic													Oc_1980_aR	GTTTAAATCCTTGAACTCCCTTTTCCAG		yam_O_contig_2586_b	Oc_2586_bL	TGT	3	12	(TGT)	4	(TGT)4			Oc_2586_bL	(TGT)4			Oc_2586_bL	TGT				Oc_2586_b	Oc_2586_bL	170
Oc_4594_aL	CAGTTTTCCCAGTCACGACCTTCAATACCAGTGGCTTGCATTA	Oc_4594_aR	GTTTTTGAATTTGATATCGGGGTGATTC	(CTG)4	(CTG)4	CTG	0	0	-	Didn't Work													Oc_6858_aR	GTTTAGACCCAGAGGCCAAGTAGTTTCT		yam_O_contig_4594_a	Oc_4594_aL	CTG	3	12	(CTG)	4	(CTG)4			Oc_4594_aL	(CTG)4			Oc_4594_aL	CTG				Oc_4594_a	Oc_4594_aL
OsB9_c5676_5_aL	CAGTTTTCCCAGTCACGACTAACACCTTTTCACCTTCTTCCCA	OsB9_c5676_5_aR	GTTTATTGGGATTTAGGGTTTCCAAAGA	(TCT)4	(TCT)4	TCT	160	160	160-160	Monomorphic													Oc_274_aR	GTTTAATTAATTAAACAACGCGCGAC		yam_O_singleton_B310-33_9_c5676_5_a	OsB9_c5676_5_aL	TCT	3	12	(TCT)	4	(TCT)4			OsB9_c5676_5_aL	(TCT)4			OsB9_c5676_5_aL	TCT				OsB9_c5676_5_a	OsB9_c5676_5_aL	160
Oc_1444_aL	CAGTTTTCCCAGTCACGACCTTGCTAAGGCGTCTATCAACCTC	Oc_1444_aR	GTTTAAGGTTTCCGTTGACCACCTTC	(CCG)4	(CCG)4	CCG	167	170	167-170	Polymorphic													Oc_917_aR	GTTTATGAGCGCCTACCAGTGAAGAC		yam_O_contig_1444_a	Oc_1444_aL	CCG	3	12	(CCG)	4	(CCG)4			Oc_1444_aL	(CCG)4			Oc_1444_aL	CCG				Oc_1444_a	Oc_1444_aL	167
Oc_6412_aL	CAGTTTTCCCAGTCACGACTGAGGGATCCCATAGTAAAAGCAA	Oc_6412_aR	GTTTGCTTCCTCCACTCTTCTCTCCTCT	(AGG)4	(AGG)4	AGG	163	163	163-163	Monomorphic													Oc_6682_aR	GTTTCTGACCAGCTTCAAAGATGACAAT		yam_O_contig_6412_a	Oc_6412_aL	AGG	3	12	(AGG)	4	(AGG)4			Oc_6412_aL	(AGG)4			Oc_6412_aL	AGG				Oc_6412_a	Oc_6412_aL	163
Oc_907_aL	CAGTTTTCCCAGTCACGACCAACTGGTGATAAATAAGCGGAAA	Oc_907_aR	GTTTGAAAATCATTTATTCAGACATACAAGCA	(TA)6	(TA)6	TA	150	184	150-184	Polymorphic													Oc_815_aR	GTTTTTTTAGGTCCTCGCCGTTAATGAT		yam_O_contig_907_a	Oc_907_aL	TA	2	12	(TA)	6	(TA)6			Oc_907_aL	(TA)6			Oc_907_aL	TA				Oc_907_a	Oc_907_aL	150
Oc_2189cL	CAGTTTTCCCAGTCACGACAAATATGGTTGGTTGTTGGTGCTT	Oc_2189cR	GTTTTTGGTTATGTGTTTACCCGCTACTT	(TTA)4	(TTA)4	TTA	181	184	181-184	Polymorphic													Oc_148_aR	GTTTCCAGTACAGAGCCATTCCATTCAT		yam_O_contig_2189_c	Oc_2189cL	TTA	3	12	(TTA)	4	(TTA)4			Oc_2189cL	(TTA)4			Oc_2189cL	TTA				Oc_2189c	Oc_2189cL	181
Oc_238_aL	CAGTTTTCCCAGTCACGACGATGATGCCAACGTTCACTTGTTA	Oc_238_aR	GTTTTAAAACAACACGAAGGAGCACGTA	(AT)6	(AT)6	AT	161	176	161-176	Polymorphic													Oc_81_aR	GTTTCATGCAAATAGAAACCAACACCAA		yam_O_contig_238_a	Oc_238_aL	AT	2	12	(AT)	6	(AT)6			Oc_238_aL	(AT)6			Oc_238_aL	AT				Oc_238_a	Oc_238_aL	161
Oc_6343_aL	CAGTTTTCCCAGTCACGACATTTGGCTTGCTCATATGATTGGT	Oc_6343_aR	GTTTGTACATGGATATGGACATCCTCCC	(TA)6	(TA)6	TA	107	109	107-109	Polymorphic													Oc_441_aR	GTTTAGGAAACATAGCCAGATTAGCAACA		yam_O_contig_6343_a	Oc_6343_aL	TA	2	12	(TA)	6	(TA)6			Oc_6343_aL	(TA)6			Oc_6343_aL	TA				Oc_6343_a	Oc_6343_aL	107
Oc_5085_aL	CAGTTTTCCCAGTCACGACAATTCCCGGGATCAAGCACTA	Oc_5085_aR	GTTTGCCAAGAAGAAAAAGAGGACCTTC	(CTT)4	(CTT)4	CTT	131	131	131-131	Monomorphic													Os87_c4651_aR	GTTTCAAACAACACAACTCCATCAATCA		yam_O_contig_5085_a	Oc_5085_aL	CTT	3	12	(CTT)	4	(CTT)4			Oc_5085_aL	(CTT)4			Oc_5085_aL	CTT				Oc_5085_a	Oc_5085_aL	131
Oc_1879_aL	CAGTTTTCCCAGTCACGACAAGAAACGGACTGCTACAGATGCT	Oc_1879_aR	GTTTAGTTGAGGCAGTTAATGGACGAAG	(GCA)4	(GCA)4	GCA	135	135	135-135	Monomorphic													Oc_5028_aR	GTTTCACCAAAATTTCACTAGCGCATAA		yam_O_contig_1879_a	Oc_1879_aL	GCA	3	12	(GCA)	4	(GCA)4			Oc_1879_aL	(GCA)4			Oc_1879_aL	GCA				Oc_1879_a	Oc_1879_aL	135
Oc_2473_aL	CAGTTTTCCCAGTCACGACCATTGCATTGACATTGGTATTGGT	Oc_2473_aR	GTTTTCAAAGCAAGCGCATAAACAACTA	(GAT)4	(GAT)4	GAT	142	149	142-149	Polymorphic													Oc_3705cR	GTTTTTCTTTCTTTTCTATACATCTCTCGCA		yam_O_contig_2473_a	Oc_2473_aL	GAT	3	12	(GAT)	4	(GAT)4			Oc_2473_aL	(GAT)4			Oc_2473_aL	GAT				Oc_2473_a	Oc_2473_aL	142
Oc_2171_aL	CAGTTTTCCCAGTCACGACTGTGGCTATTTGTTATTGTGGGATA	Oc_2171_aR	GTTTAATATAATTACATCACAACTCCATGCAC	(TA)6	(TA)6	TA	124	124	124-124	Monomorphic													Oc_2743_aR	GTTTTGCTCATAAATGGAGTCTTTGGGT		yam_O_contig_2171_a	Oc_2171_aL	TA	2	12	(TA)	6	(TA)6			Oc_2171_aL	(TA)6			Oc_2171_aL	TA				Oc_2171_a	Oc_2171_aL	124
Oc_3707_aL	CAGTTTTCCCAGTCACGACGTTTGAGATCATTTTCAGGCGG	Oc_3707_aR	GTTTATGACCTGCTTATTGGCCATGAT	(GAG)4	(GAG)4	GAG	160	160	160-160	Monomorphic													Oc_148_aR	GTTTCCAGTACAGAGCCATTCCATTCAT		yam_O_contig_3707_a	Oc_3707_aL	GAG	3	12	(GAG)	4	(GAG)4			Oc_3707_aL	(GAG)4			Oc_3707_aL	GAG				Oc_3707_a	Oc_3707_aL	160
Os87_c1911_aL	CAGTTTTCCCAGTCACGACTTCTCTGGTTCCCAATTCCACTAA	Os87_c1911_aR	GTTTGCAGAGCACCACTCTTTTCTTCTC	(AT)6	(AT)6	AT	163	165	163-165	Polymorphic													OsA8_c8634_3_aR	GTTTGTGAAGATCTTGTTTCAAGCGTCA		yam_O_singleton_87-01091-33_1_c1911_a	Os87_c1911_aL	AT	2	12	(AT)	6	(AT)6			Os87_c1911_aL	(AT)6			Os87_c1911_aL	AT				Os87_c1911_a	Os87_c1911_aL	163
Oc_1655_aL	CAGTTTTCCCAGTCACGACATTCTCTAGGGTTTCAATCCCCTC	Oc_1655_aR	GTTTGAGAACCTCCGCTTCTTCACTTT	(TCT)4	(TCT)4	TCT	147	150	147-150	Polymorphic													Oc_1707_aR	GTTTTCATAATCATGTATCAATCCACAGCA		yam_O_contig_1655_a	Oc_1655_aL	TCT	3	12	(TCT)	4	(TCT)4			Oc_1655_aL	(TCT)4			Oc_1655_aL	TCT				Oc_1655_a	Oc_1655_aL	147
Os87_c2259_aL	CAGTTTTCCCAGTCACGACAGGTTGATGACCTTAGTGACAGGC	Os87_c2259_aR	GTTTTGAATACACAGACCCAATGAAGGA	(TCT)4	(TCT)4	TCT	169	169	169-169	Monomorphic													Oc_50_aR	GTTTAGAGACATTGCAAACAAAAGCCAC		yam_O_singleton_87-01091-33_1_c2259_a	Os87_c2259_aL	TCT	3	12	(TCT)	4	(TCT)4			Os87_c2259_aL	(TCT)4			Os87_c2259_aL	TCT				Os87_c2259_a	Os87_c2259_aL	169
Oc_4996_aL	CAGTTTTCCCAGTCACGACGATGAAGAAAAGAAACCTGGCCTT	Oc_4996_aR	GTTTATCTTTGATCTTCTCCTTCAGCCC	(AGA)4	(AGA)4	AGA	265	284	265-284	Polymorphic													Oc_5076_aR	GTTTATTGTGACATTTTCCTCTGCCATT		yam_O_contig_4996_a	Oc_4996_aL	AGA	3	12	(AGA)	4	(AGA)4			Oc_4996_aL	(AGA)4			Oc_4996_aL	AGA				Oc_4996_a	Oc_4996_aL	265
Os87_c5226_aL	CAGTTTTCCCAGTCACGACGCAACATCACCGTCAACGAG	Os87_c5226_aR	GTTTACCATTCAGTTCCTCCAGTTTCC	(GGC)4	(GGC)4	GGC	0	0	-	Didn't Work													Oc_6143_aR	GTTTTTGTTTGTCCACTTGAGGCTTACA		yam_O_singleton_87-01091-33_1_c5226_a	Os87_c5226_aL	GGC	3	12	(GGC)	4	(GGC)4			Os87_c5226_aL	(GGC)4			Os87_c5226_aL	GGC				Os87_c5226_a	Os87_c5226_aL
Oc_2457_aL	CAGTTTTCCCAGTCACGACAGGGGGAAGGATGACAAAAGTTAC	Oc_2457_aR	GTTTCTCTTATCAGCGCAATCACAGTTG	(TTC)4	(TTC)4	TTC	0	0	-	Didn't Work													Oc_5523_aR	GTTTTGAGAGTGATGCGGTTTTTGTTTA		yam_O_contig_2457_a	Oc_2457_aL	TTC	3	12	(TTC)	4	(TTC)4			Oc_2457_aL	(TTC)4			Oc_2457_aL	TTC				Oc_2457_a	Oc_2457_aL
Oc_3435_aL	CAGTTTTCCCAGTCACGACCAAATTTGCTGAAATGAATGCTTG	Oc_3435_aR	GTTTCCAGAAAATACTCATCACCACCAA	(TG)6	(TG)6	TG	166	166	166-166	Monomorphic													Oc_5164_aR	GTTTATCCCATAACACCAGTCCCGAT		yam_O_contig_3435_a	Oc_3435_aL	TG	2	12	(TG)	6	(TG)6			Oc_3435_aL	(TG)6			Oc_3435_aL	TG				Oc_3435_a	Oc_3435_aL	166
Os87_c4637_aL	CAGTTTTCCCAGTCACGACTAAGTCATCATCAATGGTCGGTTC	Os87_c4637_aR	GTTTGGTTCGATCAAAATGGAGTATGTG	(TGA)4	(TGA)4	TGA	170	170	170-170	Monomorphic													Oc_4595_aR	GTTTCAAAATCTCAGACAGGAGACAGCA		yam_O_singleton_87-01091-33_1_c4637_a	Os87_c4637_aL	TGA	3	12	(TGA)	4	(TGA)4			Os87_c4637_aL	(TGA)4			Os87_c4637_aL	TGA				Os87_c4637_a	Os87_c4637_aL	170
Oc_1265_aL	CAGTTTTCCCAGTCACGACAACGATGAGGCGGTGGACTT	Oc_1265_aR	GTTTTATCTTGGGTACGTTGATGGCTTC	(CGA)4	(CGA)4	CGA	103	103	103-103	Monomorphic													Os87_lrc3675_aR	GTTTAACGAACCAACGAAACAAAGTACG		yam_O_contig_1265_a	Oc_1265_aL	CGA	3	12	(CGA)	4	(CGA)4			Oc_1265_aL	(CGA)4			Oc_1265_aL	CGA				Oc_1265_a	Oc_1265_aL	103
Oc_2484_aL	CAGTTTTCCCAGTCACGACCTTTGCTTGCTGCAATGTATCATC	Oc_2484_aR	GTTTACACAAGACATGAAAACCACAACC	(GAT)4	(GAT)4	GAT	175	175	175-175	Monomorphic													Oc_119_aR	GTTTCAACATGAGTTCACACAACAACGA		yam_O_contig_2484_a	Oc_2484_aL	GAT	3	12	(GAT)	4	(GAT)4			Oc_2484_aL	(GAT)4			Oc_2484_aL	GAT				Oc_2484_a	Oc_2484_aL	175
Oc_5191_aL	CAGTTTTCCCAGTCACGACGTGGAAGCGTGGAACTGGAAT	Oc_5191_aR	GTTTACTGGATTGAAGTCCTTGACGAAG	(ATG)4	(ATG)4	ATG	149	149	149-149	Monomorphic													Oc_5458_aR	GTTTGGGCACTCTAGAATCACTACAGCC		yam_O_contig_5191_a	Oc_5191_aL	ATG	3	12	(ATG)	4	(ATG)4			Oc_5191_aL	(ATG)4			Oc_5191_aL	ATG				Oc_5191_a	Oc_5191_aL	149
Oc_393_aL	CAGTTTTCCCAGTCACGACTTCTCTCGTTCGAAATTTGTAGCC	Oc_393_aR	GTTTGAGAACGGAGAGATTCCAGACAAC	(GAT)4	(GAT)4	GAT	136	136	136-136	Monomorphic													Oc_7299_aR	GTTTGCGATGGAGATCCTGAGTGA		yam_O_contig_393_a	Oc_393_aL	GAT	3	12	(GAT)	4	(GAT)4			Oc_393_aL	(GAT)4			Oc_393_aL	GAT				Oc_393_a	Oc_393_aL	136
Oc_605_aL	CAGTTTTCCCAGTCACGACTCACAATCCCCAATCCTCTTCTAA	Oc_605_aR	GTTTGGAAAGCCTCTTCATGGTTGATTA	(CT)6	(CT)6	CT	129	129	129-129	Monomorphic													Oc_469_aR	GTTTCACTCCGTTGCATCTCATGATAAC		yam_O_contig_605_a	Oc_605_aL	CT	2	12	(CT)	6	(CT)6			Oc_605_aL	(CT)6			Oc_605_aL	CT				Oc_605_a	Oc_605_aL	129
																							Oc_6374_aR	GTTTCAAAACAAAATCCCAAATGGCTAC
																							OsA8_c5283_4_aR	GTTTTTCATTCAATCAAATACCCACAACA
																							Oc_2947_bR	GTTTTGATTTCAAAAAGGATTAAGACATGGA
																							Oc_1395_aR	GTTTGAGAGCAAGAAAGTGAAGAAACCCT
																							Oc_4267_aR	GTTTCACTACAATGGATTCGAGGGGATA
																							Oc_44_aR	GTTTTCCACACTGCTAGAGAAATGCTTG
																							Oc_6026_aR	GTTTCCATCACAACAGTGCATTACCAAA
																							Oc_4895cR	GTTTGAACCAGAGGTCCAGAACCTATACAA
																							Oc_393_bR	GTTTTAGAAGCGATAGGCGAAATAGACG
																							Oc_2822_bR	GTTTGGACTCTCCCAAGTCCATCACTAA
																							Os87_lrc3379_aR	GTTTTTTTTACTAGCATCATCGTTCGCA
																							Oc_1259_aL	CAGTTTTCCCAGTCACGACGGCCATGAAAACATCTCTATTGCT
																							Oc_1804_aL	CAGTTTTCCCAGTCACGACAGAACATCGAGTCAAACACTTCCC
																							OsB9_c10038_2_aL	CAGTTTTCCCAGTCACGACTTTAAGAGGGATGTTGAAAAATAAACTT
																							Oc_1923_aL	CAGTTTTCCCAGTCACGACCCAGTCTCTCCATTGCCACTACTT
																							Oc_798_aL	CAGTTTTCCCAGTCACGACGGGTTCCCTCATCGTCTCTCTAA
																							Oc_5107_aL	CAGTTTTCCCAGTCACGACCGTCTCAAAAATTTCAAGAAATCAAAC
																							Os87_c5620_aL	CAGTTTTCCCAGTCACGACGAGCTTCATTGCTTGTTGTTTGTG
																							Oc_2285_aL	CAGTTTTCCCAGTCACGACACATAACCTAAACGATCACAATGCC
																							Oc_323_aL	CAGTTTTCCCAGTCACGACCTTCGACTCCGACATCAGCC
																							Oc_2173cL	CAGTTTTCCCAGTCACGACAAGCACCACCACCTCTTTTAATCA
																							Oc_5817_aL	CAGTTTTCCCAGTCACGACGACCTGGTCTCAATGACATCGTTT
																							Os87_c8695_aL	CAGTTTTCCCAGTCACGACGTCTTGCTGTTCTTCCTCATCGAC
																							Oc_224_aL	CAGTTTTCCCAGTCACGACATTTGGTGGATCAAATCCCTCTTT
																							Oc_897_aL	CAGTTTTCCCAGTCACGACTGACAATTTAGTGTGAACTGGTGAA
																							Oc_554_aL	CAGTTTTCCCAGTCACGACTCATAATCGTCCTCCTTGTCGTG
																							Os87_lrc3677_aL	CAGTTTTCCCAGTCACGACATCTCCTCTCTCCTTCACTCCCTC
																							Oc_4478_aL	CAGTTTTCCCAGTCACGACGGCTTCTCAATCTCAATCTGGAAT
																							Oc_1225_aL	CAGTTTTCCCAGTCACGACGGTAAGGAGAAATTGGCATCAGTG
																							Oc_2998_aL	CAGTTTTCCCAGTCACGACAGCAGATTGATGAATTCTTTTCGG
																							Oc_4870_bL	CAGTTTTCCCAGTCACGACGCCTGAAGGAGGTCTGAACTGAT
																							Oc_1892_aL	CAGTTTTCCCAGTCACGACTAATGCTATCTGAGGAGGATCCCA
																							Oc_955_aL	CAGTTTTCCCAGTCACGACAGATGATGCAATGTTGGGAAAAGT
																							Os87_lrc7533_aL	CAGTTTTCCCAGTCACGACGGAGTGCTTCATTTTCCTCTGATG
																							Oc_3895_aL	CAGTTTTCCCAGTCACGACATTTCGGGTATTGTGTTCTCTTGG
																							Os87_lrc4214_bL	CAGTTTTCCCAGTCACGACGCTTGGTTTAGTACTTGGGGACCT
																							Os87_c3168_aL	CAGTTTTCCCAGTCACGACTAAAGCTGGACGCTTTAAGATTCG
																							Oc_3189_aL	CAGTTTTCCCAGTCACGACTTTTGGAGATGGATTCAAAAAGTGA
																							Oc_4494_aL	CAGTTTTCCCAGTCACGACCAGAAGATCAAAGCTGCTGTTCAA
																							Oc_506_aL	CAGTTTTCCCAGTCACGACCTCATGAGATTCATTCAGGAACCA
																							Oc_5228_aL	CAGTTTTCCCAGTCACGACTTTCTCTACCTGGTGTCCCTTCAC
																							Oc_5063_aL	CAGTTTTCCCAGTCACGACGTATACCTCCGATGGTGCCTTCT
																							Os87_c10557_aL	CAGTTTTCCCAGTCACGACTGTTGTAATCCCATTGGTCCG
																							Os87_lrc4228_bL	CAGTTTTCCCAGTCACGACATCAGTTTCTTGAATTCCACCCAA
																							Oc_959_aL	CAGTTTTCCCAGTCACGACGATGTTTTCTCCTTCCTGGAACC
																							Os87_lrc7923_aL	CAGTTTTCCCAGTCACGACCACGGAGGAATTTTAGAAGGATGA
																							Oc_2488_aL	CAGTTTTCCCAGTCACGACTTGCAGATGAGAGCAGTTTGGTTA
																							Oc_2590_aL	CAGTTTTCCCAGTCACGACACTTGTTTGAGAACTCTGGGGTTG
																							Oc_237_aL	CAGTTTTCCCAGTCACGACGATGAAGGGGCTAAAGTGCAAATA
																							Oc_4677_bL	CAGTTTTCCCAGTCACGACTAGGGTTAGCGTTAGAGTTCCCGT
																							Oc_5183_bL	CAGTTTTCCCAGTCACGACGTGGATTCTCGGTGAAACAAAAAC
																							Os87_lrc5706_aL	CAGTTTTCCCAGTCACGACCTTGCAGCTCTGAATGCTTACAAC
																							Oc_1780_aL	CAGTTTTCCCAGTCACGACATTTCCTGGAATTGCCAACATTT
																							Oc_4253_aL	CAGTTTTCCCAGTCACGACGTTGCGTCCATCTCCTTCATTATC
																							Oc_1629_bL	CAGTTTTCCCAGTCACGACTGAGTTGTTTCAGAGAGAAAATTTCAG
																							Oc_5925_aL	CAGTTTTCCCAGTCACGACAGTGGTGCATCATCTGTCACTTCT
																							Oc_5988_aL	CAGTTTTCCCAGTCACGACGGCGATACTTGTGGAGGACTCTTA
																							Oc_4031_aL	CAGTTTTCCCAGTCACGACGGGCTAACAGGAGGAATTAACCAT
																							Oc_6249_aL	CAGTTTTCCCAGTCACGACTTCCGTGGTCTCTTCTTCATCTTC
																							Oc_1259_aR	GTTTTGCTCCATCTGATACCTTTCACTG
																							Oc_1804_aR	GTTTAGAACTCAATGCCAAACACAACAA
																							OsB9_c10038_2_aR	GTTTAACTCCTAATCCTTCATATTCCTCAAA
																							Oc_1923_aR	GTTTTTTCTTGAGTCTGAGTCCCTTTCG
																							Oc_798_aR	GTTTGGAGAAGGACTGAAAGAGAAGCAA
																							Oc_5107_aR	GTTTGCCCAAATGAATCAAGAAAAGATG
																							Os87_c5620_aR	GTTTAGCAGTAGCAGGAACAGAGGAAGA
																							Oc_2285_aR	GTTTATATGTTTTTGTGTGGGATGCTTG
																							Oc_323_aR	GTTTACATGGATAAAGGTACCCAGGAGC
																							Oc_2173cR	GTTTAAAGAAGATCAAACCACCAGCATC
																							Oc_5817_aR	GTTTTAGTTCAAGGTTCTGGTATGGGGG
																							Os87_c8695_aR	GTTTATGATCGTTCAAAGCCAGAAACTC
																							Oc_224_aR	GTTTTATTCCCCAAGATATGCAAGCACT
																							Oc_897_aR	GTTTTCAACCTAACTTTCAATCTCTTCTCTTC
																							Oc_554_aR	GTTTTAACAAGTCCGATTTCTCCAGAGC
																							Os87_lrc3677_aR	GTTTTAGGAGAGTACAAAGTTGGCAGGG
																							Oc_4478_aR	GTTTCTTAAGATTCTCGCTCTCGGACTC
																							Oc_1225_aR	GTTTCCTTCTCCTCAACCTTCTCTTCCT
																							Oc_2998_aR	GTTTAGGGAAGAGTGATAGTTCCTGGCT
																							Oc_4870_bR	GTTTAGCTTTCACAAGCCTTTTCCTTCT
																							Oc_1892_aR	GTTTACTAAAATAGATGGACGGCTGCAT
																							Oc_955_aR	GTTTCAAACCATGAAACGCAACTCTACA
																							Os87_lrc7533_aR	GTTTATTTAAAAAGCAACGCAAAAGCAA
																							Oc_3895_aR	GTTTCATCAACACATCCACTGACTCCTC
																							Os87_lrc4214_bR	GTTTATGAAGGTGGAGGAAGAAGGAGAG
																							Os87_c3168_aR	GTTTCCACTTTATCCGCTTCTTCTCCTT
																							Oc_3189_aR	GTTTCAGAAAAATAACAACAAATTGAATGGTG
																							Oc_4494_aR	GTTTATGGGTTCGTTCTTGACTCAACTC
																							Oc_506_aR	GTTTACATCCATCCACTCAAAGTTGGTC
																							Oc_5228_aR	GTTTGAAGAAGAGGAAATGGTTGCAGTG
																							Oc_5063_aR	GTTTTGAGACAGACAGCAAGTCCTCAGT
																							Os87_c10557_aR	GTTTTTTCATCCCTTCCAAACCATTACT
																							Os87_lrc4228_bR	GTTTCACTACCAACAAATAGCAGCAGCA
																							Oc_959_aR	GTTTAAGGGGACAACGAGGAAGAGATAG
																							Os87_lrc7923_aR	GTTTAAACTACCCTCCCAACGACCTC
																							Oc_2488_aR	GTTTAGCACAACAACAAAACAACCATTG
																							Oc_2590_aR	GTTTCGGCATCCTATACATTGATGCTCT
																							Oc_237_aR	GTTTGAAAATCAGGCTCATGTTACACCC
																							Oc_4677_bR	GTTTGTCCAGAGGGGATTCGTCTTG
																							Oc_5183_bR	GTTTACGAAAAAGGGCTAACAACAACAA
																							Os87_lrc5706_aR	GTTTCACCACCATTACCACCTTCTTGTT
																							Oc_1780_aR	GTTTAACTGCTCAGCAAATGACTGATGT
																							Oc_4253_aR	GTTTACCGGGCAATCAAACTACACTTTA
																							Oc_1629_bR	GTTTCCAATTCCTTATGAACAAAATCAGC
																							Oc_5925_aR	GTTTGCGGCGTTGTCATCTATCATC
																							Oc_5988_aR	GTTTTTAACGAGTTTGAAAACCATGCAA
																							Oc_4031_aR	GTTTGTCATATGCTTATCGTCATCGTCG
																							Oc_6249_aR	GTTTCTTGTCCTCTTTGAATTTCCCCTT
																							Os87_lrc2126_aL	CAGTTTTCCCAGTCACGACCAAAGGGTTTCCAGTGTCCATAAG
																							Oc_4996_bL	CAGTTTTCCCAGTCACGACGGGCTTGGTTGTTTTGTTTTATGT
																							Oc_4606_aL	CAGTTTTCCCAGTCACGACCCTCCTCAACATACTACCATTGCC
																							Oc_759_aL	CAGTTTTCCCAGTCACGACGCTGTTTTCCTCCATAGAGATGCT
																							Oc_2415_bL	CAGTTTTCCCAGTCACGACTCTTGAAATCTTGGGAACTTCCAT
																							Oc_1345_aL	CAGTTTTCCCAGTCACGACATTCCCGGGATTTTTGGTCAC
																							Os87_c9717_aL	CAGTTTTCCCAGTCACGACAGCAGTTCAAGATTCCCAAGTCAG
																							Oc_1632_aL	CAGTTTTCCCAGTCACGACGGGATCTCCAACTCCCATCTAAAC
																							Oc_4872_aL	CAGTTTTCCCAGTCACGACAATCTGAGACACCAGGGATTCAGT
																							OsA8_c1745_20_aL	CAGTTTTCCCAGTCACGACTTTACAAGGACCTGCCACTCTCTC
																							Oc_6982_aL	CAGTTTTCCCAGTCACGACATGATTGATGCTGCAAAGAACAAA
																							Oc_5352_aL	CAGTTTTCCCAGTCACGACCATAATTCAAAGCGCACAACACTC
																							Oc_2132_aL	CAGTTTTCCCAGTCACGACAGATGTTAATGGGTTGGCAGTGAT
																							Oc_2244_aL	CAGTTTTCCCAGTCACGACGGATGCCAACTTCCACTTTATCAC
																							Oc_2141_aL	CAGTTTTCCCAGTCACGACTCTTCTTTACAACAAGCTGCTGACC
																							OsB9_c3050_9_aL	CAGTTTTCCCAGTCACGACTCATTACAAGGGAAGAAGGGATGA
[truncated: 1,040 more rows]
[truncated: 4 more columns]

## Sheet: Polymorphism and allele range
Marker Name L	Primer L	Marker Name R	Primer R	Repeat Motif	Repeat Motif w/subscript	Repeat Motif w/o #	Allele Min	Allele Max	Allele Range	Poly/Monomorphic				# Di's	# Tri's	# 4	# 5	#6	#7
[truncated: 1,152 more rows]

[truncated: 1 more sheets: Allele Ranges]
